# Supplementary material for: In-depth transcriptome characterization uncovers distinct gene family expansions for Cupressus gigantea important to this long-lived species’ adaptability to environmental cues
Source: PubMed Central journal article supplement (PMC6417167; doi:10.1186/s12864-019-5584-6), 2019-03-13
Supplement: 12864_2019_5584_MOESM10_ESM.pdf [file 12864_2019_5584_MOESM10_ESM.pdf]

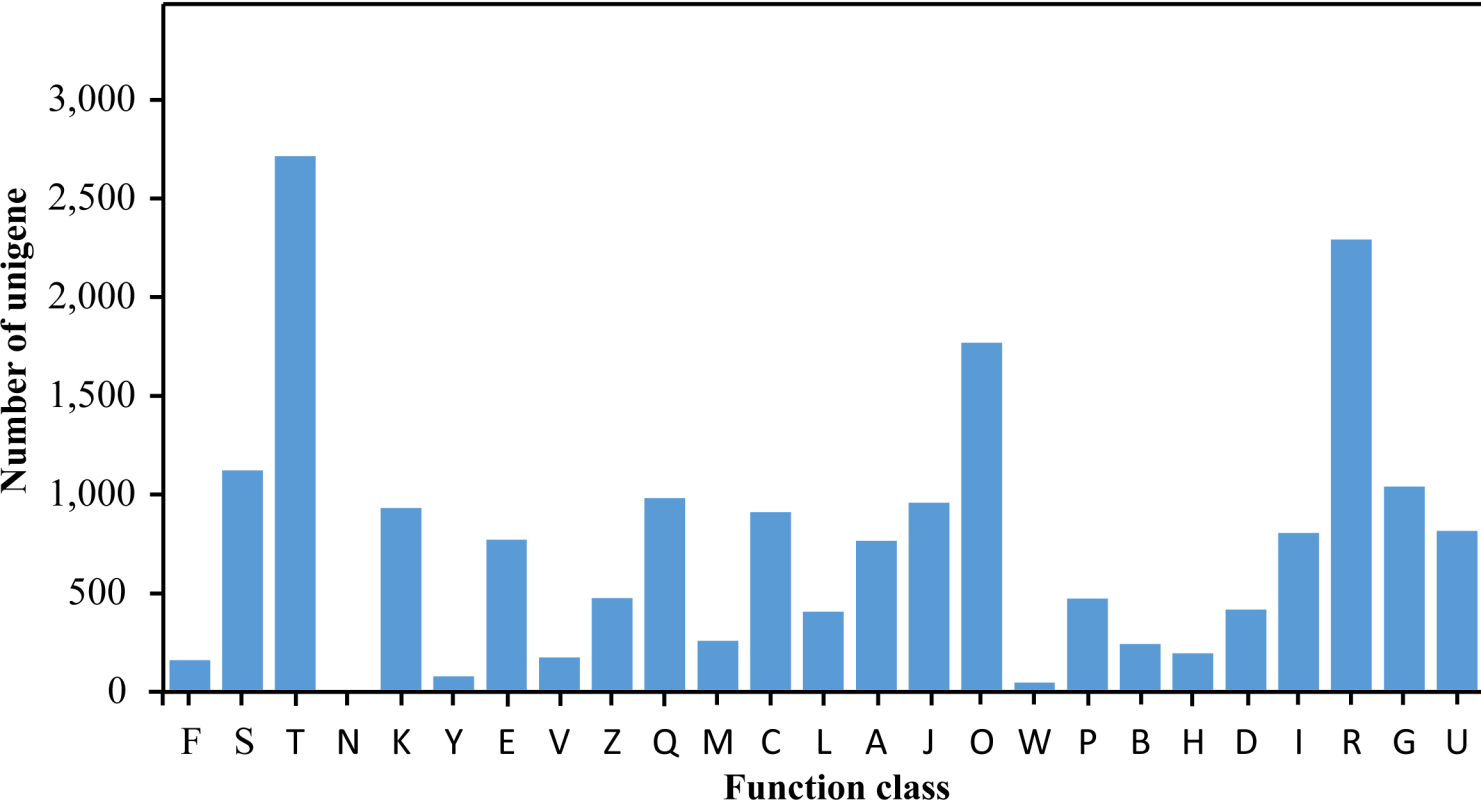

- F: Nucleotide transport and metabolism
- S: Function unknown
- T: Signal transduction mechanisms
- N: Cell motility
- K: Transcription
- Y: Nuclear structure
- E: Amino acid transport and metabolism
- V: Defense mechanisms
- Z: Cytoskeleton
- Q: Secondary metabolites biosynthesis,transport and catabolism
- M: Cell wall/membrane/envelope biogenesis
- C: Energy production and conversion
- L: Replication,recombination and repair
- A: RNA processing and modification
- O: Posttranslational modification,protein turnover,chaperones
- J: Translation,ribosomal structure and biogenesis
- W: Extracellular structures
- P: Inorganic ion transport and metabolism
- B: Chromatin structure and dynamics
- H: Coenzyme transport and metabolism
- D: Cell cycle control,cell division,chromosome partitioning
- I: Lipid transport and metabolism
- R: General function and metabolism
- G: Carbohydrate transport and metabolism
- U: Intracellular trafficking,secretion,and vesicular transport
