# Supplementary material for: In-depth transcriptome characterization uncovers distinct gene family expansions for Cupressus gigantea important to this long-lived species’ adaptability to environmental cues
Source: PubMed Central journal article supplement (PMC6417167; doi:10.1186/s12864-019-5584-6), 2019-03-13

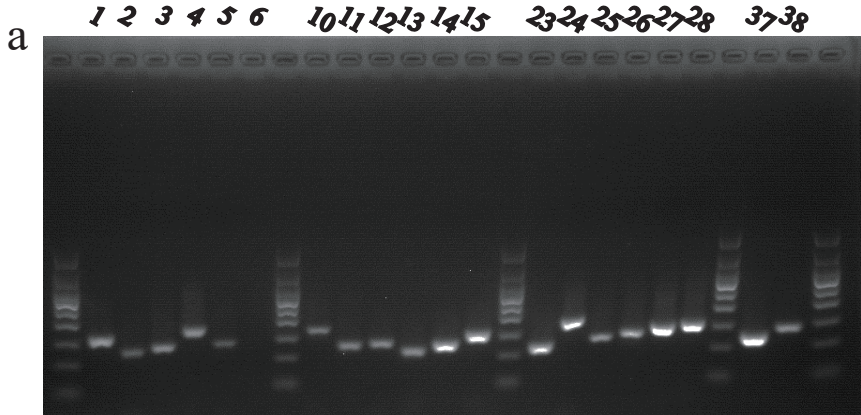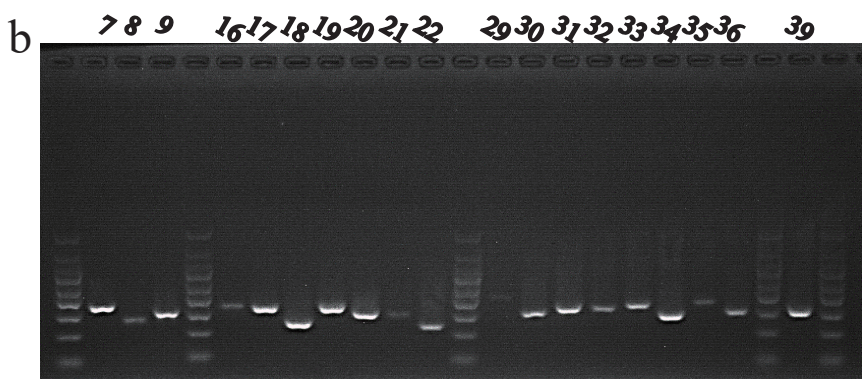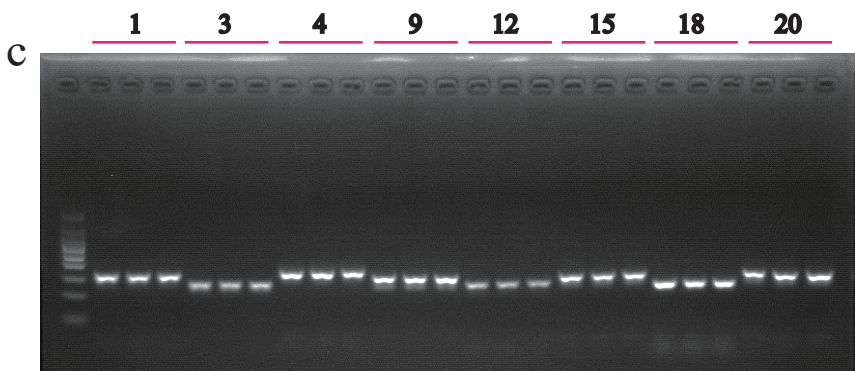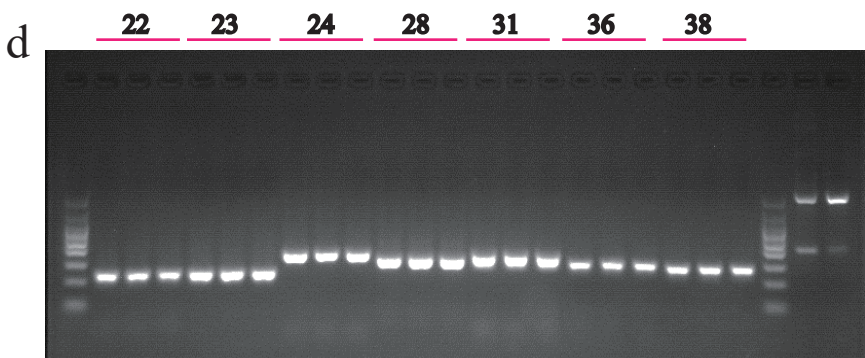

Supplement: 12864_2019_5584_MOESM18_ESM.pdf [file 12864_2019_5584_MOESM18_ESM.pdf]
