# Supplementary material for: In-depth transcriptome characterization uncovers distinct gene family expansions for Cupressus gigantea important to this long-lived species’ adaptability to environmental cues
Source: BMC Genomics. 2019 Mar 13;20:213. doi: 10.1186/s12864-019-5584-6 (PMC6417167; doi:10.1186/s12864-019-5584-6)
Supplement: Supplementary file 6 — Table S3. Database matches (full results) for C. gigantea unigenes. (XLSX 1763 kb) [file 12864_2019_5584_MOESM6_ESM.xlsx]

## Sheet: Sheet1
Supplementary Table 3. Database matches (full results) for C. gigantea unigenes
All unigenes	GO annotation	KOG annotation	Nr annotation	Swiss_port annotation	KEGG annotation
Second_Contig1		Second_Contig1	Second_Contig1	Second_Contig1
Second_Contig2
Second_Contig3	Second_Contig3		Second_Contig3
Second_Contig4
Second_Contig5			Second_Contig5
Second_Contig6			Second_Contig6
Second_Contig7
Second_Contig8
Second_Contig9
Second_Contig10
Second_Contig11
Second_Contig12	Second_Contig12	Second_Contig12		Second_Contig12
First_Contig1
First_Contig2
First_Contig3	First_Contig3		First_Contig3	First_Contig3
First_Contig4
First_Contig5	First_Contig5	First_Contig5	First_Contig5	First_Contig5
First_Contig6	First_Contig6		First_Contig6	First_Contig6
First_Contig7	First_Contig7		First_Contig7	First_Contig7
First_Contig8
First_Contig9	First_Contig9		First_Contig9	First_Contig9
First_Contig10
First_Contig11			First_Contig11	First_Contig11
First_Contig12
First_Contig13			First_Contig13
First_Contig14	First_Contig14	First_Contig14	First_Contig14	First_Contig14
First_Contig15	First_Contig15	First_Contig15	First_Contig15	First_Contig15	First_Contig15
First_Contig16			First_Contig16
First_Contig17
First_Contig18	First_Contig18	First_Contig18	First_Contig18	First_Contig18	First_Contig18
First_Contig19
First_Contig20	First_Contig20	First_Contig20	First_Contig20	First_Contig20
First_Contig21	First_Contig21		First_Contig21	First_Contig21
First_Contig22
First_Contig23
First_Contig24	First_Contig24		First_Contig24	First_Contig24
First_Contig25	First_Contig25		First_Contig25	First_Contig25
First_Contig26
First_Contig27	First_Contig27		First_Contig27	First_Contig27
First_Contig28
First_Contig29			First_Contig29
First_Contig30
First_Contig31	First_Contig31		First_Contig31	First_Contig31
First_Contig32			First_Contig32
First_Contig33
First_Contig34	First_Contig34		First_Contig34	First_Contig34
First_Contig35	First_Contig35		First_Contig35
First_Contig36			First_Contig36
First_Contig37
First_Contig38	First_Contig38		First_Contig38	First_Contig38
First_Contig39	First_Contig39		First_Contig39	First_Contig39
First_Contig40
First_Contig41	First_Contig41		First_Contig41	First_Contig41	First_Contig41
First_Contig42	First_Contig42		First_Contig42	First_Contig42
First_Contig43	First_Contig43		First_Contig43	First_Contig43	First_Contig43
First_Contig44
First_Contig45	First_Contig45		First_Contig45
First_Contig46	First_Contig46		First_Contig46	First_Contig46
First_Contig47	First_Contig47	First_Contig47	First_Contig47	First_Contig47	First_Contig47
First_Contig48	First_Contig48	First_Contig48	First_Contig48	First_Contig48	First_Contig48
First_Contig49	First_Contig49	First_Contig49	First_Contig49	First_Contig49	First_Contig49
First_Contig50	First_Contig50	First_Contig50	First_Contig50	First_Contig50	First_Contig50
First_Contig51	First_Contig51	First_Contig51	First_Contig51	First_Contig51	First_Contig51
First_Contig52	First_Contig52	First_Contig52	First_Contig52	First_Contig52	First_Contig52
First_Contig53	First_Contig53		First_Contig53
First_Contig54			First_Contig54
First_Contig55	First_Contig55		First_Contig55
First_Contig56	First_Contig56		First_Contig56
First_Contig57
First_Contig58
First_Contig59	First_Contig59	First_Contig59	First_Contig59	First_Contig59
First_Contig60	First_Contig60		First_Contig60	First_Contig60
First_Contig61	First_Contig61	First_Contig61	First_Contig61	First_Contig61	First_Contig61
First_Contig62	First_Contig62	First_Contig62	First_Contig62	First_Contig62	First_Contig62
First_Contig63	First_Contig63		First_Contig63	First_Contig63
First_Contig64			First_Contig64
First_Contig65	First_Contig65		First_Contig65	First_Contig65
First_Contig66			First_Contig66
First_Contig67
First_Contig68
First_Contig69	First_Contig69	First_Contig69	First_Contig69	First_Contig69	First_Contig69
First_Contig70			First_Contig70
First_Contig71
First_Contig72	First_Contig72	First_Contig72	First_Contig72	First_Contig72
First_Contig73	First_Contig73		First_Contig73	First_Contig73	First_Contig73
First_Contig74	First_Contig74		First_Contig74	First_Contig74
First_Contig75	First_Contig75		First_Contig75	First_Contig75
First_Contig76			First_Contig76
First_Contig77	First_Contig77	First_Contig77	First_Contig77	First_Contig77	First_Contig77
First_Contig78			First_Contig78
First_Contig79	First_Contig79		First_Contig79	First_Contig79
First_Contig80	First_Contig80	First_Contig80	First_Contig80	First_Contig80
First_Contig81	First_Contig81		First_Contig81	First_Contig81	First_Contig81
First_Contig82
First_Contig83	First_Contig83		First_Contig83	First_Contig83
First_Contig84
First_Contig85	First_Contig85		First_Contig85	First_Contig85
First_Contig86
First_Contig87
First_Contig88
First_Contig89
First_Contig90	First_Contig90			First_Contig90
First_Contig91			First_Contig91
First_Contig92
First_Contig93
First_Contig94
First_Contig95	First_Contig95		First_Contig95	First_Contig95
First_Contig96			First_Contig96
First_Contig97
First_Contig98
First_Contig99			First_Contig99	First_Contig99
First_Contig100	First_Contig100	First_Contig100	First_Contig100	First_Contig100	First_Contig100
First_Contig101	First_Contig101	First_Contig101	First_Contig101	First_Contig101
First_Contig102
First_Contig103	First_Contig103		First_Contig103	First_Contig103
First_Contig104
First_Contig105
First_Contig106
First_Contig107
First_Contig108	First_Contig108	First_Contig108	First_Contig108	First_Contig108
First_Contig109	First_Contig109	First_Contig109	First_Contig109	First_Contig109
First_Contig110
First_Contig111
First_Contig112	First_Contig112		First_Contig112	First_Contig112
First_Contig113			First_Contig113
First_Contig114			First_Contig114
First_Contig115	First_Contig115		First_Contig115	First_Contig115
First_Contig116			First_Contig116
First_Contig117
First_Contig118
First_Contig119
First_Contig120
First_Contig121	First_Contig121	First_Contig121	First_Contig121	First_Contig121
First_Contig122
First_Contig123
First_Contig124
First_Contig125	First_Contig125		First_Contig125	First_Contig125
First_Contig126
First_Contig127
First_Contig128
First_Contig129			First_Contig129
First_Contig130	First_Contig130		First_Contig130	First_Contig130
First_Contig131	First_Contig131	First_Contig131	First_Contig131
First_Contig132
First_Contig133	First_Contig133		First_Contig133	First_Contig133
First_Contig134
First_Contig135
First_Contig136
First_Contig137
First_Contig138			First_Contig138
First_Contig139
First_Contig140	First_Contig140	First_Contig140	First_Contig140	First_Contig140	First_Contig140
First_Contig141
First_Contig142	First_Contig142	First_Contig142	First_Contig142	First_Contig142	First_Contig142
First_Contig143	First_Contig143		First_Contig143	First_Contig143
First_Contig144	First_Contig144		First_Contig144	First_Contig144
First_Contig145			First_Contig145
First_Contig146
First_Contig147
First_Contig148	First_Contig148	First_Contig148	First_Contig148	First_Contig148
First_Contig149
First_Contig150
First_Contig151
First_Contig152
First_Contig153
First_Contig154
First_Contig155	First_Contig155	First_Contig155	First_Contig155	First_Contig155
First_Contig156	First_Contig156		First_Contig156	First_Contig156
First_Contig157
First_Contig158
First_Contig159			First_Contig159
First_Contig160
First_Contig161
First_Contig162
First_Contig163
First_Contig164
First_Contig165
First_Contig166	First_Contig166	First_Contig166	First_Contig166	First_Contig166
First_Contig167	First_Contig167		First_Contig167	First_Contig167	First_Contig167
First_Contig168	First_Contig168		First_Contig168	First_Contig168	First_Contig168
First_Contig169	First_Contig169	First_Contig169	First_Contig169
First_Contig170
First_Contig171
First_Contig172			First_Contig172	First_Contig172
First_Contig173		First_Contig173
First_Contig174	First_Contig174		First_Contig174	First_Contig174	First_Contig174
First_Contig175
First_Contig176
First_Contig177
First_Contig178
First_Contig179
First_Contig180
First_Contig181
First_Contig182
First_Contig183			First_Contig183
First_Contig184			First_Contig184
First_Contig185
First_Contig186
First_Contig187	First_Contig187		First_Contig187	First_Contig187
First_Contig188	First_Contig188		First_Contig188
First_Contig189	First_Contig189		First_Contig189
First_Contig190	First_Contig190	First_Contig190	First_Contig190
First_Contig191	First_Contig191		First_Contig191	First_Contig191
First_Contig192
First_Contig193
First_Contig194
First_Contig195	First_Contig195		First_Contig195	First_Contig195
First_Contig196			First_Contig196
First_Contig197
First_Contig198
First_Contig199
First_Contig200	First_Contig200		First_Contig200
First_Contig201	First_Contig201		First_Contig201	First_Contig201	First_Contig201
First_Contig202			First_Contig202
First_Contig203
First_Contig204	First_Contig204		First_Contig204	First_Contig204	First_Contig204
First_Contig205	First_Contig205	First_Contig205	First_Contig205	First_Contig205	First_Contig205
First_Contig206
First_Contig207
First_Contig208
First_Contig209	First_Contig209		First_Contig209	First_Contig209
First_Contig210
First_Contig211
First_Contig212
First_Contig213	First_Contig213		First_Contig213	First_Contig213
First_Contig214
First_Contig215			First_Contig215
First_Contig216
First_Contig217	First_Contig217		First_Contig217
First_Contig218
First_Contig219
First_Contig220
First_Contig221	First_Contig221	First_Contig221	First_Contig221	First_Contig221
First_Contig222
First_Contig223			First_Contig223	First_Contig223
First_Contig224
First_Contig225
First_Contig226
First_Contig227
First_Contig228
First_Contig229
First_Contig230			First_Contig230
First_Contig231			First_Contig231
First_Contig232			First_Contig232
First_Contig233
First_Contig234	First_Contig234		First_Contig234	First_Contig234
First_Contig235
First_Contig236
First_Contig237	First_Contig237	First_Contig237	First_Contig237	First_Contig237
First_Contig238
First_Contig239	First_Contig239	First_Contig239	First_Contig239	First_Contig239	First_Contig239
First_Contig240
First_Contig241
First_Contig242
First_Contig243			First_Contig243
First_Contig244
First_Contig245		First_Contig245	First_Contig245
First_Contig246
First_Contig247	First_Contig247		First_Contig247
First_Contig248
First_Contig249	First_Contig249	First_Contig249	First_Contig249	First_Contig249
First_Contig250
First_Contig251	First_Contig251		First_Contig251	First_Contig251
First_Contig252
First_Contig253
First_Contig254	First_Contig254		First_Contig254
First_Contig255
First_Contig256
First_Contig257	First_Contig257	First_Contig257	First_Contig257		First_Contig257
First_Contig258
First_Contig259
First_Contig260
First_Contig261			First_Contig261	First_Contig261
First_Contig262			First_Contig262
First_Contig263	First_Contig263		First_Contig263	First_Contig263
First_Contig264
First_Contig265	First_Contig265	First_Contig265	First_Contig265	First_Contig265
First_Contig266	First_Contig266	First_Contig266	First_Contig266	First_Contig266	First_Contig266
First_Contig267
First_Contig268
First_Contig269			First_Contig269
First_Contig270
First_Contig271
First_Contig272
First_Contig273	First_Contig273		First_Contig273	First_Contig273
First_Contig274
First_Contig275	First_Contig275		First_Contig275
First_Contig276
First_Contig277
First_Contig278	First_Contig278		First_Contig278	First_Contig278
First_Contig279			First_Contig279
First_Contig280	First_Contig280		First_Contig280
First_Contig281
First_Contig282
First_Contig283	First_Contig283		First_Contig283
First_Contig284	First_Contig284	First_Contig284	First_Contig284	First_Contig284
First_Contig285
First_Contig286		First_Contig286	First_Contig286
First_Contig287
First_Contig288			First_Contig288
First_Contig289	First_Contig289	First_Contig289	First_Contig289	First_Contig289
First_Contig290			First_Contig290
First_Contig291
First_Contig292
First_Contig293			First_Contig293
First_Contig294	First_Contig294	First_Contig294	First_Contig294	First_Contig294	First_Contig294
First_Contig295	First_Contig295		First_Contig295
First_Contig296			First_Contig296
First_Contig297	First_Contig297		First_Contig297	First_Contig297
First_Contig298
First_Contig299	First_Contig299		First_Contig299	First_Contig299
First_Contig300
First_Contig301	First_Contig301	First_Contig301	First_Contig301	First_Contig301
First_Contig302
First_Contig303
First_Contig304	First_Contig304	First_Contig304	First_Contig304	First_Contig304	First_Contig304
First_Contig305
First_Contig306
First_Contig307
First_Contig308
First_Contig309
First_Contig310
First_Contig311
First_Contig312
First_Contig313
First_Contig314			First_Contig314
First_Contig315	First_Contig315	First_Contig315	First_Contig315	First_Contig315
First_Contig316
First_Contig317
First_Contig318	First_Contig318		First_Contig318
First_Contig319	First_Contig319	First_Contig319	First_Contig319	First_Contig319
First_Contig320
First_Contig321
First_Contig322	First_Contig322		First_Contig322	First_Contig322	First_Contig322
First_Contig323
First_Contig324	First_Contig324		First_Contig324	First_Contig324
First_Contig325	First_Contig325		First_Contig325
First_Contig326
First_Contig327			First_Contig327
First_Contig328
First_Contig329
First_Contig330	First_Contig330		First_Contig330	First_Contig330
First_Contig331	First_Contig331		First_Contig331	First_Contig331
First_Contig332
First_Contig333
First_Contig334
First_Contig335	First_Contig335		First_Contig335	First_Contig335
First_Contig336
First_Contig337
First_Contig338	First_Contig338		First_Contig338	First_Contig338
First_Contig339			First_Contig339
First_Contig340
First_Contig341	First_Contig341		First_Contig341	First_Contig341
First_Contig342
First_Contig343
First_Contig344
First_Contig345
First_Contig346
First_Contig347
First_Contig348			First_Contig348
First_Contig349
First_Contig350
First_Contig351	First_Contig351		First_Contig351	First_Contig351
First_Contig352	First_Contig352		First_Contig352
First_Contig353	First_Contig353	First_Contig353	First_Contig353	First_Contig353
First_Contig354	First_Contig354	First_Contig354	First_Contig354	First_Contig354
First_Contig355
First_Contig356	First_Contig356	First_Contig356	First_Contig356	First_Contig356
First_Contig357
First_Contig358
First_Contig359
First_Contig360	First_Contig360		First_Contig360	First_Contig360
First_Contig361
First_Contig362	First_Contig362		First_Contig362	First_Contig362
First_Contig363
First_Contig364
First_Contig365	First_Contig365	First_Contig365	First_Contig365	First_Contig365
First_Contig366
First_Contig367
First_Contig368			First_Contig368
First_Contig369	First_Contig369		First_Contig369	First_Contig369
First_Contig370
First_Contig371
First_Contig372
First_Contig373	First_Contig373	First_Contig373	First_Contig373	First_Contig373	First_Contig373
First_Contig374
First_Contig375
First_Contig376
First_Contig377			First_Contig377
First_Contig378
First_Contig379
First_Contig380
First_Contig381			First_Contig381
First_Contig382
First_Contig383		First_Contig383
First_Contig384
First_Contig385
First_Contig386
First_Contig387
First_Contig388
First_Contig389	First_Contig389		First_Contig389	First_Contig389
First_Contig390
First_Contig391
First_Contig392
First_Contig393	First_Contig393	First_Contig393	First_Contig393	First_Contig393
First_Contig394			First_Contig394
First_Contig395
First_Contig396			First_Contig396	First_Contig396
First_Contig397
First_Contig398
First_Contig399
First_Contig400
First_Contig401
First_Contig402
First_Contig403
First_Contig404
First_Contig405
First_Contig406	First_Contig406		First_Contig406
First_Contig407
First_Contig408	First_Contig408		First_Contig408	First_Contig408
First_Contig409	First_Contig409	First_Contig409	First_Contig409	First_Contig409
First_Contig410	First_Contig410		First_Contig410	First_Contig410
First_Contig411	First_Contig411	First_Contig411	First_Contig411
First_Contig412
First_Contig413
First_Contig414			First_Contig414
First_Contig415			First_Contig415
First_Contig416
First_Contig417
First_Contig418	First_Contig418		First_Contig418
First_Contig419
First_Contig420
First_Contig421	First_Contig421		First_Contig421
First_Contig422
First_Contig423	First_Contig423	First_Contig423	First_Contig423	First_Contig423	First_Contig423
First_Contig424
First_Contig425
First_Contig426
First_Contig427
First_Contig428
First_Contig429	First_Contig429	First_Contig429	First_Contig429
First_Contig430	First_Contig430		First_Contig430	First_Contig430	First_Contig430
First_Contig431	First_Contig431	First_Contig431	First_Contig431	First_Contig431
First_Contig432
First_Contig433	First_Contig433	First_Contig433	First_Contig433	First_Contig433
First_Contig434
First_Contig435
First_Contig436
First_Contig437	First_Contig437		First_Contig437
First_Contig438
First_Contig439
First_Contig440
First_Contig441
First_Contig442
First_Contig443	First_Contig443	First_Contig443	First_Contig443	First_Contig443
First_Contig444
First_Contig445
First_Contig446
First_Contig447	First_Contig447		First_Contig447	First_Contig447
First_Contig448
First_Contig449
First_Contig450
First_Contig451
First_Contig452	First_Contig452		First_Contig452	First_Contig452
First_Contig453
First_Contig454
First_Contig455
First_Contig456	First_Contig456		First_Contig456
First_Contig457			First_Contig457
First_Contig458
First_Contig459
First_Contig460
First_Contig461
First_Contig462	First_Contig462		First_Contig462	First_Contig462
First_Contig463
First_Contig464	First_Contig464		First_Contig464	First_Contig464	First_Contig464
First_Contig465	First_Contig465		First_Contig465
First_Contig466	First_Contig466	First_Contig466	First_Contig466	First_Contig466
First_Contig467
First_Contig468
First_Contig469
First_Contig470	First_Contig470	First_Contig470	First_Contig470	First_Contig470	First_Contig470
First_Contig471
First_Contig472
First_Contig473			First_Contig473
First_Contig474
First_Contig475
First_Contig476	First_Contig476		First_Contig476	First_Contig476
First_Contig477
First_Contig478
First_Contig479
First_Contig480
First_Contig481
First_Contig482
First_Contig483
First_Contig484
First_Contig485
First_Contig486			First_Contig486
First_Contig487
First_Contig488			First_Contig488
First_Contig489
First_Contig490	First_Contig490		First_Contig490	First_Contig490
First_Contig491	First_Contig491	First_Contig491	First_Contig491	First_Contig491
First_Contig492	First_Contig492		First_Contig492	First_Contig492
First_Contig493
First_Contig494
First_Contig495
First_Contig496			First_Contig496
First_Contig497
First_Contig498	First_Contig498		First_Contig498	First_Contig498
First_Contig499
First_Contig500
First_Contig501
First_Contig502
First_Contig503	First_Contig503	First_Contig503	First_Contig503	First_Contig503
First_Contig504
First_Contig505	First_Contig505	First_Contig505	First_Contig505		First_Contig505
First_Contig506
First_Contig507
First_Contig508
First_Contig509
First_Contig510
First_Contig511	First_Contig511	First_Contig511	First_Contig511	First_Contig511
First_Contig512
First_Contig513	First_Contig513		First_Contig513	First_Contig513
First_Contig514
First_Contig515
First_Contig516		First_Contig516	First_Contig516
First_Contig517
First_Contig518
First_Contig519
First_Contig520	First_Contig520		First_Contig520	First_Contig520
First_Contig521	First_Contig521		First_Contig521	First_Contig521
First_Contig522
First_Contig523
First_Contig524		First_Contig524	First_Contig524
First_Contig525	First_Contig525		First_Contig525	First_Contig525
First_Contig526
First_Contig527
First_Contig528
First_Contig529
First_Contig530	First_Contig530		First_Contig530	First_Contig530
First_Contig531
First_Contig532	First_Contig532	First_Contig532	First_Contig532	First_Contig532	First_Contig532
First_Contig533
First_Contig534
First_Contig535
First_Contig536
First_Contig537
First_Contig538	First_Contig538	First_Contig538	First_Contig538	First_Contig538	First_Contig538
First_Contig539
First_Contig540
First_Contig541
First_Contig542
First_Contig543
First_Contig544
First_Contig545
First_Contig546
First_Contig547	First_Contig547		First_Contig547	First_Contig547
First_Contig548
First_Contig549
First_Contig550
First_Contig551
First_Contig552
First_Contig553
First_Contig554
First_Contig555
First_Contig556	First_Contig556	First_Contig556	First_Contig556	First_Contig556	First_Contig556
First_Contig557	First_Contig557	First_Contig557	First_Contig557	First_Contig557	First_Contig557
First_Contig558	First_Contig558	First_Contig558	First_Contig558
First_Contig559
First_Contig560
First_Contig561
First_Contig562	First_Contig562		First_Contig562	First_Contig562
First_Contig563	First_Contig563		First_Contig563	First_Contig563
First_Contig564
First_Contig565	First_Contig565	First_Contig565	First_Contig565	First_Contig565
First_Contig566			First_Contig566
First_Contig567			First_Contig567
First_Contig568
First_Contig569
First_Contig570
First_Contig571
First_Contig572
First_Contig573
First_Contig574
First_Contig575
First_Contig576
First_Contig577
First_Contig578
First_Contig579
First_Contig580
First_Contig581
First_Contig582	First_Contig582		First_Contig582	First_Contig582
First_Contig583
First_Contig584
First_Contig585
First_Contig586
First_Contig587
First_Contig588
First_Contig589
First_Contig590
First_Contig591
First_Contig592
First_Contig593	First_Contig593	First_Contig593	First_Contig593	First_Contig593
First_Contig594
First_Contig595
First_Contig596
First_Contig597	First_Contig597		First_Contig597
First_Contig598
First_Contig599
First_Contig600			First_Contig600
First_Contig601
First_Contig602
First_Contig603	First_Contig603	First_Contig603	First_Contig603	First_Contig603
First_Contig604
First_Contig605
First_Contig606
First_Contig607
First_Contig608
First_Contig609
First_Contig610
First_Contig611
First_Contig612
First_Contig613				First_Contig613
First_Contig614
First_Contig615
First_Contig616
First_Contig617			First_Contig617
First_Contig618
First_Contig619
First_Contig620
First_Contig621
First_Contig622	First_Contig622		First_Contig622
First_Contig623
First_Contig624
First_Contig625
First_Contig626			First_Contig626	First_Contig626
First_Contig627	First_Contig627	First_Contig627	First_Contig627	First_Contig627
First_Contig628
First_Contig629
First_Contig630			First_Contig630
First_Contig631
First_Contig632
First_Contig633
First_Contig634	First_Contig634	First_Contig634	First_Contig634	First_Contig634
First_Contig635	First_Contig635		First_Contig635
First_Contig636			First_Contig636
First_Contig637	First_Contig637		First_Contig637	First_Contig637
First_Contig638			First_Contig638
First_Contig639	First_Contig639	First_Contig639	First_Contig639	First_Contig639
First_Contig640
First_Contig641
First_Contig642			First_Contig642
First_Contig643
First_Contig644
First_Contig645	First_Contig645		First_Contig645
First_Contig646
First_Contig647
First_Contig648			First_Contig648
First_Contig649
First_Contig650
First_Contig651			First_Contig651
First_Contig652
First_Contig653
First_Contig654
First_Contig655			First_Contig655
First_Contig656
First_Contig657
First_Contig658
First_Contig659
First_Contig660			First_Contig660
First_Contig661
First_Contig662
First_Contig663	First_Contig663		First_Contig663
First_Contig664
First_Contig665
First_Contig666
First_Contig667
First_Contig668
First_Contig669			First_Contig669
First_Contig670
First_Contig671			First_Contig671
First_Contig672
First_Contig673
First_Contig674	First_Contig674		First_Contig674
First_Contig675			First_Contig675
First_Contig676
First_Contig677
First_Contig678
First_Contig679
First_Contig680
First_Contig681
First_Contig682	First_Contig682	First_Contig682	First_Contig682	First_Contig682	First_Contig682
First_Contig683
First_Contig684	First_Contig684	First_Contig684	First_Contig684	First_Contig684
First_Contig685
First_Contig686
First_Contig687
First_Contig688
First_Contig689			First_Contig689
First_Contig690
First_Contig691
First_Contig692
First_Contig693	First_Contig693		First_Contig693	First_Contig693	First_Contig693
First_Contig694
First_Contig695
First_Contig696
First_Contig697
First_Contig698
First_Contig699
First_Contig700
First_Contig701
First_Contig702
First_Contig703	First_Contig703	First_Contig703	First_Contig703	First_Contig703
First_Contig704
First_Contig705
First_Contig706
First_Contig707
First_Contig708
First_Contig709	First_Contig709	First_Contig709	First_Contig709	First_Contig709	First_Contig709
First_Contig710
First_Contig711
First_Contig712
First_Contig713
First_Contig714
First_Contig715
First_Contig716
First_Contig717
First_Contig718
First_Contig719	First_Contig719		First_Contig719
First_Contig720
First_Contig721	First_Contig721		First_Contig721	First_Contig721
First_Contig722
First_Contig723			First_Contig723
First_Contig724
First_Contig725
First_Contig726			First_Contig726
First_Contig727
First_Contig728
First_Contig729
First_Contig730
First_Contig731	First_Contig731	First_Contig731	First_Contig731	First_Contig731
First_Contig732
First_Contig733
First_Contig734
First_Contig735
First_Contig736
First_Contig737
First_Contig738
First_Contig739
First_Contig740
First_Contig741
First_Contig742
First_Contig743
First_Contig744
First_Contig745
First_Contig746
First_Contig747
First_Contig748
First_Contig749
First_Contig750
First_Contig751	First_Contig751		First_Contig751
First_Contig752
First_Contig753			First_Contig753
First_Contig754
First_Contig755
First_Contig756
First_Contig757	First_Contig757		First_Contig757	First_Contig757
First_Contig758
First_Contig759
First_Contig760			First_Contig760
First_Contig761
First_Contig762
First_Contig763
First_Contig764
First_Contig765
First_Contig766
First_Contig767	First_Contig767		First_Contig767
First_Contig768
First_Contig769
First_Contig770
First_Contig771
First_Contig772
First_Contig773
First_Contig774	First_Contig774		First_Contig774
First_Contig775
First_Contig776
First_Contig777
First_Contig778
First_Contig779
First_Contig780
First_Contig781
First_Contig782
First_Contig783
First_Contig784
First_Contig785
First_Contig786
First_Contig787
First_Contig788			First_Contig788
First_Contig789
First_Contig790	First_Contig790			First_Contig790
First_Contig791	First_Contig791	First_Contig791	First_Contig791	First_Contig791
First_Contig792
First_Contig793
First_Contig794
First_Contig795
First_Contig796	First_Contig796	First_Contig796	First_Contig796
First_Contig797
First_Contig798
First_Contig799
First_Contig800
First_Contig801
First_Contig802
First_Contig803	First_Contig803		First_Contig803	First_Contig803	First_Contig803
First_Contig804
First_Contig805
First_Contig806
First_Contig807
First_Contig808	First_Contig808		First_Contig808	First_Contig808
First_Contig809
First_Contig810
First_Contig811	First_Contig811		First_Contig811	First_Contig811
First_Contig812
First_Contig813
First_Contig814	First_Contig814		First_Contig814	First_Contig814	First_Contig814
First_Contig815
First_Contig816
First_Contig817
First_Contig818
First_Contig819
First_Contig820
First_Contig821
First_Contig822
First_Contig823
First_Contig824
First_Contig825
First_Contig826	First_Contig826		First_Contig826	First_Contig826	First_Contig826
First_Contig827
First_Contig828
First_Contig829
First_Contig830
First_Contig831	First_Contig831		First_Contig831
First_Contig832	First_Contig832		First_Contig832	First_Contig832
First_Contig833	First_Contig833	First_Contig833	First_Contig833	First_Contig833
First_Contig834
First_Contig835
First_Contig836
First_Contig837
First_Contig838
First_Contig839
First_Contig840
First_Contig841
First_Contig842
First_Contig843	First_Contig843		First_Contig843
First_Contig844
First_Contig845
First_Contig846
First_Contig847
First_Contig848
First_Contig849
First_Contig850
First_Contig851
First_Contig852
First_Contig853
First_Contig854
First_Contig855
First_Contig856
First_Contig857
First_Contig858
First_Contig859	First_Contig859		First_Contig859	First_Contig859
First_Contig860
First_Contig861
First_Contig862			First_Contig862
First_Contig863
First_Contig864
First_Contig865
First_Contig866	First_Contig866	First_Contig866	First_Contig866	First_Contig866	First_Contig866
First_Contig867
First_Contig868
First_Contig869
First_Contig870
First_Contig871
First_Contig872
First_Contig873
First_Contig874			First_Contig874
First_Contig875
First_Contig876
First_Contig877	First_Contig877	First_Contig877	First_Contig877	First_Contig877	First_Contig877
First_Contig878
First_Contig879
First_Contig880
First_Contig881
First_Contig882
First_Contig883
First_Contig884
First_Contig885
First_Contig886
First_Contig887
First_Contig888
First_Contig889
First_Contig890	First_Contig890		First_Contig890	First_Contig890
First_Contig891
First_Contig892
First_Contig893
First_Contig894	First_Contig894	First_Contig894	First_Contig894
First_Contig895
First_Contig896
First_Contig897
First_Contig898	First_Contig898	First_Contig898	First_Contig898	First_Contig898
First_Contig899
First_Contig900
First_Contig901
First_Contig902
First_Contig903	First_Contig903	First_Contig903	First_Contig903	First_Contig903	First_Contig903
First_Contig904
First_Contig905
First_Contig906
First_Contig907			First_Contig907
First_Contig908
First_Contig909
First_Contig910
First_Contig911	First_Contig911	First_Contig911	First_Contig911	First_Contig911
First_Contig912
First_Contig913
First_Contig914
First_Contig915
First_Contig916
First_Contig917
First_Contig918
First_Contig919
First_Contig920
First_Contig921
First_Contig922
First_Contig923
First_Contig924	First_Contig924		First_Contig924	First_Contig924
First_Contig925
First_Contig926
First_Contig927	First_Contig927		First_Contig927	First_Contig927
First_Contig928
First_Contig929
First_Contig930
First_Contig931	First_Contig931	First_Contig931	First_Contig931	First_Contig931	First_Contig931
First_Contig932
First_Contig933
First_Contig934
First_Contig935	First_Contig935	First_Contig935	First_Contig935
First_Contig936	First_Contig936		First_Contig936	First_Contig936
First_Contig937
First_Contig938
First_Contig939
First_Contig940
First_Contig941
First_Contig942
First_Contig943
First_Contig944
First_Contig945
First_Contig946
First_Contig947
First_Contig948
First_Contig949
First_Contig950
First_Contig951
First_Contig952
First_Contig953
First_Contig954
First_Contig955
First_Contig956
First_Contig957
First_Contig958	First_Contig958		First_Contig958	First_Contig958
First_Contig959	First_Contig959		First_Contig959
First_Contig960	First_Contig960		First_Contig960	First_Contig960
First_Contig961
First_Contig962
First_Contig963
First_Contig964			First_Contig964
First_Contig965	First_Contig965	First_Contig965	First_Contig965	First_Contig965
First_Contig966
First_Contig967	First_Contig967		First_Contig967
First_Contig968
First_Contig969
First_Contig970	First_Contig970		First_Contig970	First_Contig970
First_Contig971
First_Contig972
First_Contig973
First_Contig974
First_Contig975
First_Contig976			First_Contig976
First_Contig977
First_Contig978
First_Contig979
First_Contig980
First_Contig981
First_Contig982
First_Contig983
First_Contig984
First_Contig985
First_Contig986
First_Contig987			First_Contig987
First_Contig988			First_Contig988
First_Contig989
First_Contig990
First_Contig991
First_Contig992
First_Contig993	First_Contig993		First_Contig993	First_Contig993
First_Contig994
First_Contig995
First_Contig996
First_Contig997
First_Contig998	First_Contig998		First_Contig998	First_Contig998
First_Contig999
First_Contig1000
First_Contig1001
First_Contig1002
First_Contig1003
First_Contig1004	First_Contig1004	First_Contig1004	First_Contig1004	First_Contig1004	First_Contig1004
First_Contig1005
First_Contig1006
First_Contig1007
First_Contig1008			First_Contig1008
First_Contig1009
First_Contig1010
First_Contig1011
First_Contig1012
First_Contig1013
First_Contig1014
First_Contig1015
First_Contig1016
First_Contig1017
First_Contig1018	First_Contig1018	First_Contig1018	First_Contig1018	First_Contig1018	First_Contig1018
First_Contig1019
First_Contig1020
First_Contig1021
First_Contig1022			First_Contig1022
First_Contig1023			First_Contig1023
First_Contig1024
First_Contig1025
First_Contig1026
First_Contig1027
First_Contig1028
First_Contig1029			First_Contig1029
First_Contig1030			First_Contig1030
First_Contig1031			First_Contig1031	First_Contig1031
First_Contig1032
First_Contig1033
First_Contig1034
First_Contig1035
First_Contig1036
First_Contig1037
First_Contig1038
First_Contig1039
First_Contig1040			First_Contig1040
First_Contig1041	First_Contig1041		First_Contig1041	First_Contig1041
First_Contig1042
First_Contig1043
First_Contig1044	First_Contig1044		First_Contig1044	First_Contig1044
First_Contig1045			First_Contig1045
First_Contig1046
First_Contig1047
First_Contig1048
First_Contig1049
First_Contig1050
First_Contig1051
First_Contig1052
First_Contig1053	First_Contig1053		First_Contig1053	First_Contig1053	First_Contig1053
First_Contig1054
First_Contig1055
First_Contig1056
First_Contig1057
First_Contig1058	First_Contig1058		First_Contig1058	First_Contig1058
First_Contig1059
First_Contig1060
First_Contig1061
First_Contig1062
First_Contig1063
First_Contig1064
First_Contig1065
First_Contig1066	First_Contig1066			First_Contig1066
First_Contig1067
First_Contig1068
First_Contig1069
First_Contig1070	First_Contig1070	First_Contig1070	First_Contig1070	First_Contig1070
First_Contig1071
First_Contig1072
First_Contig1073
First_Contig1074
First_Contig1075
First_Contig1076			First_Contig1076
First_Contig1077	First_Contig1077		First_Contig1077	First_Contig1077
First_Contig1078	First_Contig1078	First_Contig1078	First_Contig1078	First_Contig1078
First_Contig1079
First_Contig1080
First_Contig1081
First_Contig1082
First_Contig1083
First_Contig1084
First_Contig1085
First_Contig1086
First_Contig1087
First_Contig1088
First_Contig1089
First_Contig1090	First_Contig1090	First_Contig1090	First_Contig1090	First_Contig1090	First_Contig1090
First_Contig1091
First_Contig1092
First_Contig1093
First_Contig1094
First_Contig1095	First_Contig1095	First_Contig1095	First_Contig1095	First_Contig1095
First_Contig1096
First_Contig1097
First_Contig1098			First_Contig1098
First_Contig1099
First_Contig1100
First_Contig1101
First_Contig1102
First_Contig1103
First_Contig1104
First_Contig1105				First_Contig1105
First_Contig1106
First_Contig1107
First_Contig1108
First_Contig1109
First_Contig1110
First_Contig1111	First_Contig1111		First_Contig1111	First_Contig1111
First_Contig1112
First_Contig1113	First_Contig1113		First_Contig1113	First_Contig1113	First_Contig1113
First_Contig1114
First_Contig1115
First_Contig1116	First_Contig1116		First_Contig1116
First_Contig1117
First_Contig1118
First_Contig1119	First_Contig1119		First_Contig1119
First_Contig1120
First_Contig1121			First_Contig1121
First_Contig1122
First_Contig1123
First_Contig1124
First_Contig1125
First_Contig1126
First_Contig1127	First_Contig1127		First_Contig1127	First_Contig1127
First_Contig1128
First_Contig1129
First_Contig1130
First_Contig1131
First_Contig1132
First_Contig1133
First_Contig1134
First_Contig1135
First_Contig1136
First_Contig1137
First_Contig1138
First_Contig1139	First_Contig1139	First_Contig1139	First_Contig1139	First_Contig1139	First_Contig1139
First_Contig1140
First_Contig1141	First_Contig1141		First_Contig1141	First_Contig1141
First_Contig1142
First_Contig1143
First_Contig1144
First_Contig1145
First_Contig1146
First_Contig1147
First_Contig1148
First_Contig1149
First_Contig1150
First_Contig1151
First_Contig1152
First_Contig1153
First_Contig1154	First_Contig1154		First_Contig1154	First_Contig1154
First_Contig1155
First_Contig1156	First_Contig1156		First_Contig1156	First_Contig1156
First_Contig1157
First_Contig1158			First_Contig1158
First_Contig1159	First_Contig1159	First_Contig1159	First_Contig1159	First_Contig1159
First_Contig1160	First_Contig1160	First_Contig1160	First_Contig1160	First_Contig1160	First_Contig1160
First_Contig1161
First_Contig1162	First_Contig1162		First_Contig1162
First_Contig1163
First_Contig1164
First_Contig1165
First_Contig1166
First_Contig1167
First_Contig1168	First_Contig1168		First_Contig1168	First_Contig1168
First_Contig1169
First_Contig1170
First_Contig1171
First_Contig1172
First_Contig1173
First_Contig1174
First_Contig1175	First_Contig1175		First_Contig1175	First_Contig1175
First_Contig1176
First_Contig1177	First_Contig1177		First_Contig1177
First_Contig1178
First_Contig1179
First_Contig1180	First_Contig1180	First_Contig1180	First_Contig1180	First_Contig1180	First_Contig1180
First_Contig1181
First_Contig1182
First_Contig1183
First_Contig1184
First_Contig1185
First_Contig1186
First_Contig1187
First_Contig1188
First_Contig1189
First_Contig1190
First_Contig1191
First_Contig1192
First_Contig1193
First_Contig1194
First_Contig1195
First_Contig1196
First_Contig1197
First_Contig1198
First_Contig1199
First_Contig1200
First_Contig1201
First_Contig1202
First_Contig1203
First_Contig1204
First_Contig1205
First_Contig1206
First_Contig1207	First_Contig1207		First_Contig1207	First_Contig1207
First_Contig1208			First_Contig1208
First_Contig1209			First_Contig1209
First_Contig1210
First_Contig1211
First_Contig1212
First_Contig1213
First_Contig1214
First_Contig1215
First_Contig1216
First_Contig1217
First_Contig1218
First_Contig1219
First_Contig1220
First_Contig1221
First_Contig1222
First_Contig1223
First_Contig1224
First_Contig1225	First_Contig1225	First_Contig1225	First_Contig1225	First_Contig1225	First_Contig1225
First_Contig1226
First_Contig1227	First_Contig1227	First_Contig1227	First_Contig1227	First_Contig1227	First_Contig1227
First_Contig1228
First_Contig1229
First_Contig1230
First_Contig1231
First_Contig1232
First_Contig1233
First_Contig1234
First_Contig1235
First_Contig1236	First_Contig1236	First_Contig1236	First_Contig1236	First_Contig1236	First_Contig1236
First_Contig1237
First_Contig1238
First_Contig1239
First_Contig1240
First_Contig1241
First_Contig1242
First_Contig1243
First_Contig1244
First_Contig1245
First_Contig1246
First_Contig1247
First_Contig1248
First_Contig1249
First_Contig1250
First_Contig1251
First_Contig1252
First_Contig1253
First_Contig1254
First_Contig1255	First_Contig1255		First_Contig1255	First_Contig1255
First_Contig1256
First_Contig1257	First_Contig1257		First_Contig1257	First_Contig1257
First_Contig1258
First_Contig1259
First_Contig1260
First_Contig1261
First_Contig1262	First_Contig1262		First_Contig1262	First_Contig1262
First_Contig1263
First_Contig1264	First_Contig1264	First_Contig1264	First_Contig1264
First_Contig1265
First_Contig1266
First_Contig1267
First_Contig1268
First_Contig1269
First_Contig1270
First_Contig1271
First_Contig1272			First_Contig1272
First_Contig1273	First_Contig1273		First_Contig1273	First_Contig1273
First_Contig1274
First_Contig1275
First_Contig1276
First_Contig1277
First_Contig1278
First_Contig1279
First_Contig1280
First_Contig1281
First_Contig1282
First_Contig1283
First_Contig1284
First_Contig1285
First_Contig1286
First_Contig1287
First_Contig1288
First_Contig1289
First_Contig1290
First_Contig1291	First_Contig1291		First_Contig1291	First_Contig1291
First_Contig1292	First_Contig1292	First_Contig1292	First_Contig1292	First_Contig1292
First_Contig1293
First_Contig1294	First_Contig1294		First_Contig1294	First_Contig1294
First_Contig1295	First_Contig1295		First_Contig1295
First_Contig1296
First_Contig1297
First_Contig1298
First_Contig1299
First_Contig1300
First_Contig1301
First_Contig1302	First_Contig1302	First_Contig1302	First_Contig1302	First_Contig1302	First_Contig1302
First_Contig1303
First_Contig1304
First_Contig1305
First_Contig1306
First_Contig1307
First_Contig1308
First_Contig1309
First_Contig1310
First_Contig1311	First_Contig1311		First_Contig1311
First_Contig1312
First_Contig1313
First_Contig1314
First_Contig1315
First_Contig1316
First_Contig1317
First_Contig1318
First_Contig1319
First_Contig1320	First_Contig1320	First_Contig1320	First_Contig1320
First_Contig1321
First_Contig1322
First_Contig1323
First_Contig1324	First_Contig1324	First_Contig1324	First_Contig1324	First_Contig1324	First_Contig1324
First_Contig1325
First_Contig1326
First_Contig1327
First_Contig1328	First_Contig1328	First_Contig1328	First_Contig1328	First_Contig1328
First_Contig1329	First_Contig1329	First_Contig1329	First_Contig1329	First_Contig1329	First_Contig1329
First_Contig1330
First_Contig1331			First_Contig1331
First_Contig1332
First_Contig1333
First_Contig1334
First_Contig1335
First_Contig1336
First_Contig1337
First_Contig1338
First_Contig1339
First_Contig1340
First_Contig1341
First_Contig1342
First_Contig1343
First_Contig1344
First_Contig1345
First_Contig1346
First_Contig1347
First_Contig1348	First_Contig1348		First_Contig1348	First_Contig1348
First_Contig1349
First_Contig1350	First_Contig1350		First_Contig1350	First_Contig1350
First_Contig1351
First_Contig1352
First_Contig1353	First_Contig1353	First_Contig1353	First_Contig1353	First_Contig1353	First_Contig1353
First_Contig1354
First_Contig1355	First_Contig1355		First_Contig1355
First_Contig1356
First_Contig1357
First_Contig1358
First_Contig1359
First_Contig1360
First_Contig1361	First_Contig1361	First_Contig1361	First_Contig1361	First_Contig1361
First_Contig1362
First_Contig1363
First_Contig1364
First_Contig1365
First_Contig1366
First_Contig1367
First_Contig1368
First_Contig1369
First_Contig1370
First_Contig1371
First_Contig1372
First_Contig1373
First_Contig1374	First_Contig1374	First_Contig1374	First_Contig1374	First_Contig1374
First_Contig1375
First_Contig1376	First_Contig1376	First_Contig1376	First_Contig1376	First_Contig1376	First_Contig1376
First_Contig1377
First_Contig1378
First_Contig1379
First_Contig1380
First_Contig1381			First_Contig1381
First_Contig1382	First_Contig1382
First_Contig1383
First_Contig1384	First_Contig1384	First_Contig1384	First_Contig1384
First_Contig1385
First_Contig1386
First_Contig1387
First_Contig1388
First_Contig1389
First_Contig1390
First_Contig1391
First_Contig1392
First_Contig1393
First_Contig1394
First_Contig1395	First_Contig1395		First_Contig1395
First_Contig1396	First_Contig1396		First_Contig1396	First_Contig1396
First_Contig1397
First_Contig1398
First_Contig1399
First_Contig1400
First_Contig1401			First_Contig1401
First_Contig1402
First_Contig1403
First_Contig1404
First_Contig1405	First_Contig1405		First_Contig1405	First_Contig1405
First_Contig1406
First_Contig1407	First_Contig1407	First_Contig1407	First_Contig1407
First_Contig1408
First_Contig1409
First_Contig1410	First_Contig1410		First_Contig1410	First_Contig1410
First_Contig1411
First_Contig1412
First_Contig1413
First_Contig1414	First_Contig1414	First_Contig1414	First_Contig1414	First_Contig1414
contig_1	contig_1	contig_1	contig_1	contig_1	contig_1
contig_2	contig_2		contig_2	contig_2
contig_3	contig_3	contig_3	contig_3	contig_3	contig_3
contig_4	contig_4	contig_4	contig_4	contig_4	contig_4
contig_5	contig_5		contig_5	contig_5
contig_6	contig_6	contig_6	contig_6	contig_6
contig_7	contig_7	contig_7	contig_7
contig_8
contig_9	contig_9	contig_9	contig_9	contig_9
contig_10
contig_11	contig_11	contig_11	contig_11	contig_11
contig_12	contig_12	contig_12	contig_12	contig_12
contig_13
contig_14	contig_14	contig_14	contig_14	contig_14
contig_15	contig_15	contig_15	contig_15	contig_15
contig_16	contig_16	contig_16	contig_16	contig_16	contig_16
contig_17	contig_17	contig_17	contig_17	contig_17
contig_18	contig_18	contig_18	contig_18	contig_18
contig_19	contig_19		contig_19	contig_19
contig_20	contig_20	contig_20	contig_20	contig_20
contig_21	contig_21		contig_21	contig_21
contig_22	contig_22		contig_22	contig_22	contig_22
contig_23	contig_23	contig_23	contig_23	contig_23	contig_23
contig_24		contig_24	contig_24	contig_24
contig_25	contig_25	contig_25	contig_25	contig_25	contig_25
contig_26	contig_26	contig_26	contig_26	contig_26
contig_27	contig_27	contig_27	contig_27	contig_27	contig_27
contig_28	contig_28	contig_28	contig_28	contig_28	contig_28
contig_29	contig_29	contig_29	contig_29	contig_29	contig_29
contig_30	contig_30	contig_30	contig_30	contig_30	contig_30
contig_31	contig_31	contig_31	contig_31	contig_31
contig_32	contig_32		contig_32
contig_33
contig_35	contig_35	contig_35	contig_35	contig_35	contig_35
contig_36	contig_36	contig_36	contig_36
contig_37	contig_37		contig_37	contig_37
contig_38			contig_38
contig_39	contig_39		contig_39
contig_40	contig_40	contig_40	contig_40	contig_40	contig_40
contig_41
contig_42	contig_42	contig_42	contig_42	contig_42	contig_42
contig_43	contig_43	contig_43	contig_43	contig_43	contig_43
contig_44	contig_44		contig_44
contig_45	contig_45		contig_45
contig_46	contig_46	contig_46	contig_46	contig_46	contig_46
contig_47	contig_47	contig_47	contig_47	contig_47	contig_47
contig_48	contig_48	contig_48	contig_48	contig_48
contig_49	contig_49	contig_49	contig_49	contig_49	contig_49
contig_50	contig_50	contig_50	contig_50	contig_50	contig_50
contig_51	contig_51	contig_51	contig_51	contig_51
contig_52	contig_52		contig_52	contig_52
contig_53	contig_53	contig_53	contig_53	contig_53
contig_54	contig_54	contig_54	contig_54	contig_54	contig_54
contig_55	contig_55		contig_55	contig_55	contig_55
contig_56	contig_56	contig_56	contig_56	contig_56
contig_57	contig_57	contig_57	contig_57	contig_57
contig_58		contig_58	contig_58	contig_58	contig_58
contig_59	contig_59	contig_59	contig_59	contig_59
contig_60
contig_61
contig_62	contig_62	contig_62	contig_62	contig_62	contig_62
contig_63	contig_63	contig_63	contig_63	contig_63
contig_64
contig_65	contig_65	contig_65	contig_65	contig_65
contig_66
contig_67	contig_67	contig_67	contig_67	contig_67
contig_68	contig_68	contig_68	contig_68	contig_68	contig_68
contig_69	contig_69	contig_69	contig_69	contig_69	contig_69
contig_70	contig_70		contig_70	contig_70
contig_71	contig_71	contig_71	contig_71	contig_71
contig_72	contig_72	contig_72	contig_72	contig_72
contig_73	contig_73	contig_73	contig_73	contig_73
contig_74	contig_74	contig_74	contig_74	contig_74
contig_75	contig_75	contig_75	contig_75	contig_75
contig_76
contig_77	contig_77	contig_77	contig_77	contig_77
contig_78	contig_78		contig_78
contig_79	contig_79	contig_79	contig_79	contig_79
contig_80	contig_80	contig_80	contig_80	contig_80	contig_80
contig_81
contig_82
contig_83
contig_84	contig_84	contig_84	contig_84	contig_84
contig_85	contig_85		contig_85	contig_85
contig_86	contig_86		contig_86
contig_87	contig_87		contig_87	contig_87
contig_88			contig_88
contig_89			contig_89
contig_90	contig_90	contig_90	contig_90	contig_90
contig_91	contig_91	contig_91	contig_91	contig_91	contig_91
contig_92	contig_92		contig_92	contig_92
contig_93			contig_93
contig_94	contig_94	contig_94	contig_94	contig_94
contig_95	contig_95	contig_95	contig_95	contig_95
contig_96	contig_96		contig_96	contig_96	contig_96
contig_97	contig_97	contig_97	contig_97	contig_97	contig_97
contig_98	contig_98		contig_98
contig_99	contig_99		contig_99	contig_99
contig_100	contig_100		contig_100	contig_100
contig_101	contig_101		contig_101	contig_101	contig_101
contig_102	contig_102		contig_102		contig_102
contig_103	contig_103		contig_103
contig_104
contig_105	contig_105	contig_105	contig_105	contig_105
contig_106	contig_106	contig_106	contig_106	contig_106
contig_107	contig_107	contig_107	contig_107	contig_107	contig_107
contig_108	contig_108	contig_108	contig_108	contig_108
contig_109	contig_109		contig_109
contig_110	contig_110		contig_110
contig_111	contig_111		contig_111	contig_111	contig_111
contig_112	contig_112		contig_112	contig_112	contig_112
contig_113	contig_113		contig_113	contig_113
contig_114
contig_115
contig_116	contig_116		contig_116	contig_116	contig_116
contig_117	contig_117	contig_117	contig_117	contig_117
contig_118
contig_119	contig_119	contig_119	contig_119	contig_119
contig_120
contig_121
contig_122	contig_122	contig_122	contig_122	contig_122	contig_122
contig_123
contig_124	contig_124	contig_124	contig_124	contig_124
contig_125	contig_125	contig_125	contig_125	contig_125	contig_125
contig_126	contig_126	contig_126	contig_126	contig_126	contig_126
contig_127	contig_127	contig_127	contig_127
contig_128	contig_128	contig_128	contig_128	contig_128
contig_129		contig_129
contig_130			contig_130
contig_131	contig_131	contig_131	contig_131	contig_131
contig_132	contig_132	contig_132	contig_132	contig_132
contig_133	contig_133	contig_133	contig_133	contig_133	contig_133
contig_134
contig_135
contig_136	contig_136		contig_136	contig_136	contig_136
contig_137	contig_137	contig_137	contig_137	contig_137	contig_137
contig_138	contig_138	contig_138	contig_138	contig_138	contig_138
contig_139
contig_140	contig_140		contig_140
contig_141	contig_141	contig_141	contig_141
contig_142	contig_142	contig_142	contig_142	contig_142	contig_142
contig_143			contig_143
contig_144	contig_144		contig_144	contig_144	contig_144
contig_145	contig_145	contig_145	contig_145	contig_145
contig_146
contig_147	contig_147	contig_147	contig_147	contig_147	contig_147
contig_148	contig_148	contig_148	contig_148	contig_148	contig_148
contig_149			contig_149
contig_150	contig_150		contig_150	contig_150
contig_151	contig_151	contig_151	contig_151	contig_151
contig_152	contig_152	contig_152	contig_152	contig_152
contig_153	contig_153	contig_153	contig_153	contig_153
contig_154	contig_154	contig_154	contig_154	contig_154
contig_155	contig_155	contig_155	contig_155	contig_155
contig_156	contig_156	contig_156	contig_156	contig_156	contig_156
contig_157	contig_157	contig_157	contig_157	contig_157
contig_158	contig_158	contig_158	contig_158	contig_158	contig_158
contig_159	contig_159	contig_159	contig_159	contig_159	contig_159
contig_160	contig_160	contig_160	contig_160	contig_160	contig_160
contig_161
contig_162	contig_162	contig_162	contig_162	contig_162
contig_163	contig_163	contig_163	contig_163	contig_163	contig_163
contig_164	contig_164	contig_164	contig_164	contig_164	contig_164
contig_165	contig_165		contig_165	contig_165
contig_166
contig_167	contig_167	contig_167	contig_167	contig_167
contig_168	contig_168	contig_168	contig_168	contig_168	contig_168
contig_169	contig_169		contig_169
contig_170			contig_170
contig_171
contig_174	contig_174	contig_174	contig_174	contig_174
contig_175			contig_175
contig_176	contig_176		contig_176	contig_176
contig_177	contig_177		contig_177	contig_177	contig_177
contig_178	contig_178	contig_178	contig_178
contig_179	contig_179	contig_179	contig_179	contig_179	contig_179
contig_180	contig_180		contig_180	contig_180
contig_181	contig_181		contig_181
contig_182
contig_183
contig_184	contig_184	contig_184	contig_184	contig_184	contig_184
contig_185	contig_185	contig_185	contig_185	contig_185	contig_185
contig_186	contig_186		contig_186	contig_186
contig_187	contig_187	contig_187	contig_187	contig_187
contig_188	contig_188	contig_188	contig_188	contig_188
contig_189	contig_189		contig_189
contig_190	contig_190		contig_190
contig_191	contig_191	contig_191	contig_191	contig_191	contig_191
contig_192	contig_192	contig_192	contig_192	contig_192
contig_193	contig_193		contig_193
contig_194	contig_194	contig_194	contig_194	contig_194	contig_194
contig_195	contig_195	contig_195	contig_195	contig_195
contig_196	contig_196	contig_196	contig_196	contig_196
contig_197		contig_197	contig_197
contig_198			contig_198
contig_199	contig_199	contig_199	contig_199	contig_199	contig_199
contig_200	contig_200		contig_200	contig_200	contig_200
contig_201	contig_201	contig_201	contig_201	contig_201
contig_202	contig_202	contig_202	contig_202	contig_202
contig_203	contig_203		contig_203	contig_203
contig_204	contig_204		contig_204	contig_204	contig_204
contig_205	contig_205	contig_205	contig_205	contig_205
contig_206	contig_206	contig_206	contig_206	contig_206	contig_206
contig_207
contig_208	contig_208	contig_208	contig_208	contig_208	contig_208
contig_209	contig_209	contig_209	contig_209	contig_209
contig_210			contig_210
contig_211	contig_211	contig_211	contig_211	contig_211
contig_212
contig_213	contig_213	contig_213	contig_213
contig_214	contig_214	contig_214	contig_214	contig_214
contig_215	contig_215		contig_215
contig_216	contig_216	contig_216	contig_216	contig_216	contig_216
contig_217
contig_218	contig_218		contig_218	contig_218	contig_218
contig_219	contig_219		contig_219	contig_219	contig_219
contig_220			contig_220	contig_220
contig_221	contig_221	contig_221	contig_221	contig_221
contig_222	contig_222	contig_222	contig_222	contig_222
contig_223	contig_223		contig_223	contig_223	contig_223
contig_225	contig_225	contig_225	contig_225	contig_225	contig_225
contig_226	contig_226	contig_226	contig_226	contig_226	contig_226
contig_227	contig_227	contig_227	contig_227	contig_227
contig_228
contig_229	contig_229	contig_229	contig_229	contig_229
contig_230	contig_230	contig_230	contig_230
contig_231	contig_231	contig_231	contig_231	contig_231	contig_231
contig_232	contig_232		contig_232	contig_232
contig_233	contig_233	contig_233	contig_233	contig_233
contig_234	contig_234	contig_234	contig_234	contig_234
contig_235
contig_236	contig_236		contig_236	contig_236
contig_237	contig_237		contig_237
contig_238	contig_238		contig_238	contig_238
contig_239	contig_239	contig_239	contig_239	contig_239	contig_239
contig_240	contig_240		contig_240	contig_240
contig_241	contig_241	contig_241	contig_241	contig_241
contig_242	contig_242	contig_242	contig_242	contig_242
contig_243	contig_243	contig_243	contig_243	contig_243
contig_244	contig_244	contig_244	contig_244	contig_244	contig_244
contig_245
contig_246	contig_246		contig_246
contig_247	contig_247	contig_247	contig_247	contig_247
contig_248	contig_248	contig_248	contig_248	contig_248
contig_249	contig_249		contig_249	contig_249
contig_250
contig_251	contig_251		contig_251	contig_251
contig_252	contig_252		contig_252	contig_252	contig_252
contig_253	contig_253	contig_253	contig_253	contig_253	contig_253
contig_254
contig_255			contig_255
contig_256	contig_256	contig_256	contig_256	contig_256	contig_256
contig_257	contig_257		contig_257	contig_257
contig_258	contig_258		contig_258	contig_258
contig_259	contig_259	contig_259	contig_259	contig_259
contig_260	contig_260		contig_260	contig_260
contig_261	contig_261	contig_261	contig_261	contig_261	contig_261
contig_262	contig_262	contig_262	contig_262	contig_262
contig_263	contig_263	contig_263	contig_263	contig_263
contig_264	contig_264		contig_264
contig_265	contig_265	contig_265	contig_265	contig_265
contig_266	contig_266	contig_266	contig_266	contig_266	contig_266
contig_267	contig_267	contig_267	contig_267	contig_267
contig_268	contig_268	contig_268	contig_268	contig_268	contig_268
contig_269	contig_269	contig_269	contig_269	contig_269	contig_269
contig_270	contig_270	contig_270	contig_270	contig_270	contig_270
contig_271	contig_271	contig_271	contig_271	contig_271	contig_271
contig_272	contig_272	contig_272	contig_272	contig_272
contig_273	contig_273		contig_273	contig_273
contig_274
contig_275	contig_275	contig_275	contig_275	contig_275	contig_275
contig_276	contig_276		contig_276	contig_276
contig_277	contig_277		contig_277	contig_277	contig_277
contig_278	contig_278	contig_278	contig_278	contig_278
contig_279	contig_279	contig_279	contig_279	contig_279
contig_280	contig_280	contig_280	contig_280	contig_280	contig_280
contig_281	contig_281	contig_281	contig_281	contig_281
contig_282	contig_282		contig_282	contig_282
contig_283	contig_283	contig_283	contig_283	contig_283	contig_283
contig_284	contig_284	contig_284	contig_284	contig_284
contig_285
contig_286
contig_287
contig_288	contig_288	contig_288	contig_288	contig_288
contig_289	contig_289	contig_289	contig_289	contig_289
contig_290	contig_290	contig_290	contig_290	contig_290	contig_290
contig_291	contig_291		contig_291	contig_291	contig_291
contig_292	contig_292	contig_292	contig_292	contig_292
contig_293	contig_293	contig_293	contig_293	contig_293
contig_294	contig_294		contig_294	contig_294
contig_295	contig_295	contig_295	contig_295	contig_295
contig_296	contig_296		contig_296
contig_297	contig_297	contig_297	contig_297	contig_297
contig_298	contig_298	contig_298	contig_298	contig_298	contig_298
contig_299			contig_299	contig_299
contig_300	contig_300		contig_300	contig_300
contig_301	contig_301	contig_301	contig_301	contig_301
contig_302
contig_303	contig_303	contig_303	contig_303	contig_303
contig_304	contig_304	contig_304	contig_304	contig_304
contig_305			contig_305
contig_306	contig_306	contig_306	contig_306	contig_306
contig_307	contig_307		contig_307
contig_308	contig_308		contig_308	contig_308	contig_308
contig_309	contig_309	contig_309	contig_309	contig_309
contig_310	contig_310	contig_310	contig_310	contig_310
contig_311	contig_311	contig_311	contig_311	contig_311	contig_311
contig_313	contig_313	contig_313	contig_313	contig_313
contig_315
contig_318	contig_318	contig_318	contig_318	contig_318	contig_318
contig_319	contig_319	contig_319	contig_319	contig_319	contig_319
contig_320	contig_320	contig_320	contig_320	contig_320	contig_320
contig_321
contig_322
contig_323	contig_323		contig_323	contig_323
contig_324	contig_324	contig_324	contig_324	contig_324
contig_325	contig_325	contig_325	contig_325	contig_325
contig_326	contig_326	contig_326	contig_326	contig_326
contig_327	contig_327	contig_327	contig_327	contig_327	contig_327
contig_328	contig_328		contig_328
contig_329	contig_329		contig_329	contig_329
contig_330	contig_330	contig_330	contig_330	contig_330	contig_330
contig_331	contig_331	contig_331	contig_331	contig_331	contig_331
contig_332
contig_333	contig_333	contig_333	contig_333	contig_333	contig_333
contig_334	contig_334		contig_334	contig_334
contig_335	contig_335	contig_335	contig_335	contig_335	contig_335
contig_336	contig_336	contig_336	contig_336	contig_336
contig_337	contig_337		contig_337	contig_337
contig_338
contig_339	contig_339	contig_339	contig_339	contig_339	contig_339
contig_340	contig_340	contig_340	contig_340	contig_340
contig_341	contig_341	contig_341	contig_341	contig_341
contig_342	contig_342	contig_342	contig_342	contig_342
contig_343
contig_344	contig_344	contig_344	contig_344	contig_344
contig_345
contig_346	contig_346	contig_346	contig_346	contig_346
contig_347	contig_347	contig_347	contig_347	contig_347
contig_349	contig_349	contig_349	contig_349	contig_349	contig_349
contig_350	contig_350		contig_350	contig_350
contig_351	contig_351		contig_351	contig_351
contig_352
contig_353
contig_354	contig_354	contig_354	contig_354	contig_354	contig_354
contig_355	contig_355	contig_355	contig_355	contig_355	contig_355
contig_356	contig_356	contig_356	contig_356	contig_356	contig_356
contig_357
contig_358	contig_358		contig_358
contig_359	contig_359	contig_359	contig_359	contig_359	contig_359
contig_360	contig_360		contig_360	contig_360
contig_361	contig_361		contig_361	contig_361
contig_362	contig_362		contig_362	contig_362
contig_363	contig_363		contig_363	contig_363
contig_364	contig_364	contig_364	contig_364	contig_364	contig_364
contig_365	contig_365	contig_365	contig_365	contig_365
contig_366
contig_367	contig_367	contig_367	contig_367	contig_367
contig_368	contig_368	contig_368	contig_368	contig_368	contig_368
contig_369	contig_369	contig_369	contig_369	contig_369	contig_369
contig_370	contig_370		contig_370	contig_370
contig_371	contig_371	contig_371	contig_371	contig_371	contig_371
contig_372	contig_372	contig_372	contig_372	contig_372	contig_372
contig_373	contig_373	contig_373	contig_373	contig_373
contig_374	contig_374	contig_374	contig_374	contig_374	contig_374
contig_375	contig_375	contig_375	contig_375	contig_375
contig_376	contig_376	contig_376	contig_376	contig_376	contig_376
contig_377	contig_377		contig_377	contig_377
contig_378
contig_379	contig_379	contig_379	contig_379	contig_379
contig_380	contig_380		contig_380	contig_380	contig_380
contig_381	contig_381	contig_381	contig_381	contig_381	contig_381
contig_382	contig_382	contig_382	contig_382	contig_382
contig_383	contig_383	contig_383	contig_383	contig_383	contig_383
contig_384	contig_384	contig_384	contig_384	contig_384	contig_384
contig_385
contig_386
contig_387	contig_387	contig_387	contig_387	contig_387	contig_387
contig_388	contig_388	contig_388	contig_388	contig_388	contig_388
contig_389	contig_389	contig_389	contig_389	contig_389
contig_390	contig_390	contig_390	contig_390	contig_390
contig_391
contig_392
contig_393	contig_393		contig_393
contig_394	contig_394		contig_394
contig_395
contig_396	contig_396	contig_396	contig_396	contig_396	contig_396
contig_397	contig_397	contig_397	contig_397	contig_397
contig_398	contig_398	contig_398	contig_398	contig_398	contig_398
contig_399	contig_399	contig_399	contig_399	contig_399
contig_400	contig_400		contig_400	contig_400
contig_401	contig_401	contig_401	contig_401	contig_401	contig_401
contig_402	contig_402	contig_402	contig_402	contig_402	contig_402
contig_403	contig_403	contig_403	contig_403	contig_403
contig_404	contig_404	contig_404	contig_404	contig_404	contig_404
contig_405	contig_405		contig_405	contig_405
contig_406			contig_406	contig_406
contig_407	contig_407	contig_407	contig_407	contig_407
contig_408	contig_408	contig_408	contig_408	contig_408	contig_408
contig_409	contig_409	contig_409	contig_409		contig_409
contig_410	contig_410	contig_410	contig_410	contig_410	contig_410
contig_411	contig_411		contig_411	contig_411
contig_412	contig_412	contig_412	contig_412	contig_412	contig_412
contig_413	contig_413	contig_413	contig_413	contig_413	contig_413
contig_414
contig_415	contig_415	contig_415	contig_415	contig_415
contig_416	contig_416	contig_416	contig_416	contig_416
contig_417	contig_417	contig_417	contig_417	contig_417	contig_417
contig_418	contig_418	contig_418	contig_418	contig_418	contig_418
contig_419	contig_419	contig_419	contig_419	contig_419
contig_420	contig_420	contig_420	contig_420	contig_420	contig_420
contig_421	contig_421	contig_421	contig_421	contig_421	contig_421
contig_422	contig_422	contig_422	contig_422	contig_422	contig_422
contig_423
contig_424	contig_424		contig_424	contig_424	contig_424
contig_425
contig_426	contig_426	contig_426	contig_426	contig_426	contig_426
contig_427	contig_427	contig_427	contig_427	contig_427
contig_428	contig_428	contig_428	contig_428	contig_428	contig_428
contig_429	contig_429	contig_429	contig_429	contig_429	contig_429
contig_430	contig_430		contig_430
contig_431	contig_431	contig_431	contig_431	contig_431	contig_431
contig_432	contig_432	contig_432	contig_432	contig_432	contig_432
contig_433	contig_433	contig_433	contig_433	contig_433
contig_434	contig_434	contig_434	contig_434	contig_434	contig_434
contig_435	contig_435	contig_435	contig_435	contig_435	contig_435
contig_436	contig_436		contig_436	contig_436
contig_437	contig_437		contig_437	contig_437	contig_437
contig_438	contig_438	contig_438	contig_438	contig_438	contig_438
contig_439
contig_440	contig_440		contig_440	contig_440	contig_440
contig_442	contig_442	contig_442	contig_442
contig_443	contig_443	contig_443	contig_443
contig_444
contig_445	contig_445	contig_445	contig_445	contig_445
contig_446	contig_446	contig_446	contig_446	contig_446	contig_446
contig_447	contig_447	contig_447	contig_447	contig_447	contig_447
contig_448	contig_448	contig_448	contig_448	contig_448	contig_448
contig_449	contig_449	contig_449	contig_449	contig_449	contig_449
contig_450	contig_450	contig_450	contig_450	contig_450
contig_451			contig_451
contig_452	contig_452	contig_452	contig_452	contig_452
contig_453	contig_453		contig_453	contig_453
contig_454	contig_454	contig_454	contig_454	contig_454	contig_454
contig_455
contig_456	contig_456	contig_456	contig_456	contig_456
contig_457	contig_457		contig_457	contig_457
contig_458	contig_458		contig_458	contig_458	contig_458
contig_459	contig_459	contig_459	contig_459	contig_459
contig_460	contig_460	contig_460	contig_460	contig_460
contig_461	contig_461	contig_461	contig_461	contig_461
contig_462	contig_462	contig_462	contig_462	contig_462
contig_463	contig_463	contig_463	contig_463	contig_463	contig_463
contig_464	contig_464		contig_464	contig_464
contig_465	contig_465		contig_465	contig_465
contig_466	contig_466		contig_466	contig_466
contig_467	contig_467	contig_467	contig_467	contig_467	contig_467
contig_468	contig_468		contig_468	contig_468
contig_469	contig_469	contig_469	contig_469	contig_469	contig_469
contig_470	contig_470	contig_470	contig_470	contig_470
contig_471	contig_471	contig_471	contig_471	contig_471
contig_472	contig_472	contig_472	contig_472	contig_472	contig_472
contig_473	contig_473	contig_473	contig_473	contig_473
contig_474	contig_474	contig_474	contig_474	contig_474
contig_475	contig_475	contig_475	contig_475	contig_475
contig_476			contig_476
contig_477	contig_477		contig_477	contig_477
contig_478			contig_478
contig_479	contig_479		contig_479	contig_479
contig_480	contig_480	contig_480	contig_480	contig_480
contig_481			contig_481
contig_482	contig_482	contig_482	contig_482	contig_482
contig_483	contig_483	contig_483	contig_483	contig_483
contig_484	contig_484	contig_484	contig_484	contig_484
contig_485
contig_486	contig_486	contig_486	contig_486	contig_486	contig_486
contig_487	contig_487	contig_487	contig_487	contig_487	contig_487
contig_488	contig_488	contig_488	contig_488	contig_488
contig_489	contig_489		contig_489	contig_489
contig_490	contig_490		contig_490
contig_491	contig_491		contig_491
contig_492	contig_492	contig_492	contig_492	contig_492
contig_493	contig_493	contig_493	contig_493	contig_493
contig_494	contig_494		contig_494	contig_494
contig_495	contig_495		contig_495	contig_495
contig_496	contig_496			contig_496
contig_497	contig_497	contig_497	contig_497	contig_497
contig_498	contig_498	contig_498	contig_498	contig_498
contig_499	contig_499	contig_499	contig_499	contig_499
contig_500
contig_501	contig_501	contig_501	contig_501	contig_501	contig_501
contig_502	contig_502	contig_502	contig_502	contig_502	contig_502
contig_503	contig_503	contig_503	contig_503	contig_503	contig_503
contig_504	contig_504		contig_504	contig_504	contig_504
contig_505	contig_505		contig_505	contig_505	contig_505
contig_506
contig_507	contig_507	contig_507	contig_507	contig_507	contig_507
contig_508	contig_508	contig_508	contig_508	contig_508	contig_508
contig_509	contig_509	contig_509	contig_509	contig_509	contig_509
contig_510	contig_510		contig_510	contig_510
contig_511	contig_511	contig_511	contig_511	contig_511
contig_512	contig_512		contig_512	contig_512
contig_513	contig_513		contig_513	contig_513
contig_514	contig_514	contig_514	contig_514	contig_514
contig_515
contig_516
contig_517
contig_518	contig_518	contig_518	contig_518	contig_518	contig_518
contig_519	contig_519	contig_519	contig_519	contig_519
contig_520	contig_520	contig_520	contig_520
contig_521	contig_521	contig_521	contig_521	contig_521
contig_522	contig_522	contig_522	contig_522	contig_522
contig_523	contig_523	contig_523	contig_523	contig_523
contig_524
contig_525	contig_525	contig_525	contig_525	contig_525	contig_525
contig_526	contig_526	contig_526	contig_526	contig_526
contig_527	contig_527	contig_527	contig_527	contig_527	contig_527
contig_528	contig_528		contig_528	contig_528
contig_529
contig_530	contig_530	contig_530	contig_530	contig_530	contig_530
contig_531	contig_531	contig_531	contig_531	contig_531	contig_531
contig_532	contig_532	contig_532	contig_532	contig_532
contig_533	contig_533	contig_533	contig_533	contig_533	contig_533
contig_534			contig_534	contig_534
contig_535	contig_535		contig_535	contig_535
contig_536	contig_536	contig_536	contig_536	contig_536	contig_536
contig_537	contig_537	contig_537	contig_537	contig_537	contig_537
contig_538	contig_538	contig_538	contig_538	contig_538	contig_538
contig_539	contig_539		contig_539	contig_539
contig_540	contig_540	contig_540	contig_540	contig_540	contig_540
contig_541	contig_541	contig_541	contig_541	contig_541	contig_541
contig_542	contig_542	contig_542	contig_542	contig_542	contig_542
contig_543	contig_543		contig_543
contig_544	contig_544	contig_544	contig_544	contig_544
contig_545
contig_546
contig_547	contig_547	contig_547	contig_547	contig_547
contig_548	contig_548	contig_548	contig_548	contig_548	contig_548
contig_549	contig_549		contig_549	contig_549
contig_551	contig_551	contig_551	contig_551	contig_551	contig_551
contig_552	contig_552	contig_552	contig_552	contig_552
contig_553		contig_553	contig_553		contig_553
contig_554	contig_554	contig_554	contig_554	contig_554	contig_554
contig_555	contig_555	contig_555	contig_555		contig_555
contig_556			contig_556
contig_557	contig_557	contig_557	contig_557	contig_557	contig_557
contig_558	contig_558	contig_558	contig_558	contig_558	contig_558
contig_559	contig_559	contig_559	contig_559	contig_559
contig_560	contig_560	contig_560	contig_560	contig_560	contig_560
contig_561		contig_561	contig_561
contig_562	contig_562	contig_562	contig_562	contig_562
contig_563	contig_563	contig_563	contig_563	contig_563
contig_564	contig_564		contig_564	contig_564
contig_565
contig_566	contig_566	contig_566	contig_566	contig_566	contig_566
contig_567	contig_567		contig_567	contig_567
contig_568	contig_568	contig_568	contig_568	contig_568	contig_568
contig_569	contig_569	contig_569	contig_569	contig_569
contig_570	contig_570		contig_570	contig_570
contig_571	contig_571		contig_571	contig_571	contig_571
contig_572	contig_572	contig_572	contig_572	contig_572	contig_572
contig_573	contig_573	contig_573	contig_573	contig_573	contig_573
contig_574	contig_574	contig_574	contig_574	contig_574
contig_575	contig_575	contig_575	contig_575	contig_575	contig_575
contig_576	contig_576		contig_576	contig_576	contig_576
contig_577	contig_577	contig_577	contig_577	contig_577
contig_578	contig_578	contig_578	contig_578	contig_578	contig_578
contig_579	contig_579		contig_579	contig_579	contig_579
contig_580
contig_581
contig_582	contig_582	contig_582	contig_582	contig_582	contig_582
contig_583	contig_583	contig_583	contig_583	contig_583
[truncated: 99,094 more rows]
