# Supplementary material for: In-depth transcriptome characterization uncovers distinct gene family expansions for Cupressus gigantea important to this long-lived species’ adaptability to environmental cues
Source: BMC Genomics. 2019 Mar 13;20:213. doi: 10.1186/s12864-019-5584-6 (PMC6417167; doi:10.1186/s12864-019-5584-6)
Supplement: Supplementary file 14 — Table S7. Functional enrichment analysis of the specific gene families from C. gigantea. The full list of Gene Ontology (GO) enriched functional categories are shown. (XLSX 108 kb) [file 12864_2019_5584_MOESM14_ESM.xlsx]

## Sheet: S7 fig
supplementary Table 7. Functional enrichment analysis of the specific gene families from C. gigantean
ID	Description	GeneRatio	BgRatio	pvalue	p.adjust	qvalue	geneID	Count
GO:0009862	systemic acquired resistance, salicylic acid mediated signaling pathway	154/3804	444/43701	3.60797e-53	1.90501e-49	1.69423e-49	c105502_g2_i1|m.54630/c107987_g4_i1|m.69426/c105502_g3_i1|m.54636/c106764_g1_i6|m.61458/c99694_g1_i1|m.32627/c108263_g2_i2|m.71163/c108263_g9_i1|m.71179/c103447_g1_i1|m.45220/c108704_g1_i15|m.74335/c108704_g1_i8|m.74316/c75137_g2_i1|m.10137/c100572_g1_i1|m.35189/c100572_g1_i2|m.35191/c13129_g2_i1|m.1262/c72151_g1_i1|m.9375/c108815_g1_i1|m.75059/c107947_g1_i6|m.69108/c107947_g1_i8|m.69112/c111204_…	154
GO:0010449	root meristem growth	143/3804	449/43701	2.07498e-44	5.47795e-41	4.87184e-41	c110461_g2_i9|m.87262/c104829_g2_i1|m.51116/c105120_g2_i1|m.52641/c106293_g4_i2|m.58763/c110461_g2_i5|m.87253/c107987_g6_i1|m.69430/c107987_g5_i1|m.69428/c109451_g8_i2|m.79432/c105668_g5_i1|m.55386/c111074_g2_i1|m.92621/c105881_g9_i1|m.56563/c106764_g1_i6|m.61458/c109590_g2_i3|m.80585/c87419_g1_i1|m.15239/c108263_g9_i1|m.71179/c85870_g2_i1|m.14188/c22275_g1_i1|m.2385/c107901_g3_i1|m.68673/c175781…	143
GO:0009595	detection of biotic stimulus	114/3804	336/43701	1.32346e-38	1.74697e-35	1.55368e-35	c104112_g3_i1|m.47926/c100573_g2_i1|m.35194/c107529_g5_i1|m.66186/c123324_g1_i1|m.96984/c98318_g1_i1|m.29161/c139116_g1_i1|m.98515/c73376_g1_i1|m.9813/c29342_g2_i1|m.3268/c100573_g3_i1|m.35195/c109924_g1_i3|m.82988/c101515_g1_i1|m.37973/c109845_g3_i1|m.82373/c110732_g1_i2|m.89648/c109845_g4_i1|m.82374/c109845_g2_i1|m.82369/c106509_g3_i1|m.59952/c109768_g6_i1|m.81775/c106802_g1_i2|m.61685/c15214_g…	114
GO:0098581	detection of external biotic stimulus	114/3804	336/43701	1.32346e-38	1.74697e-35	1.55368e-35	c104112_g3_i1|m.47926/c100573_g2_i1|m.35194/c107529_g5_i1|m.66186/c123324_g1_i1|m.96984/c98318_g1_i1|m.29161/c139116_g1_i1|m.98515/c73376_g1_i1|m.9813/c29342_g2_i1|m.3268/c100573_g3_i1|m.35195/c109924_g1_i3|m.82988/c101515_g1_i1|m.37973/c109845_g3_i1|m.82373/c110732_g1_i2|m.89648/c109845_g4_i1|m.82374/c109845_g2_i1|m.82369/c106509_g3_i1|m.59952/c109768_g6_i1|m.81775/c106802_g1_i2|m.61685/c15214_g…	114
GO:0016045	detection of bacterium	98/3804	271/43701	5.00912e-36	4.40803e-33	3.9203e-33	c104112_g3_i1|m.47926/c100573_g2_i1|m.35194/c98318_g1_i1|m.29161/c139116_g1_i1|m.98515/c29342_g2_i1|m.3268/c100573_g3_i1|m.35195/c109924_g1_i3|m.82988/c101515_g1_i1|m.37973/c109845_g3_i1|m.82373/c110732_g1_i2|m.89648/c109845_g2_i1|m.82369/c106509_g3_i1|m.59952/c109768_g6_i1|m.81775/c106802_g1_i2|m.61685/c15214_g1_i1|m.1560/c111086_g3_i1|m.92774/c108987_g2_i3|m.76192/c98004_g6_i1|m.28466/c13355_g1…	98
GO:0098543	detection of other organism	98/3804	271/43701	5.00912e-36	4.40803e-33	3.9203e-33	c104112_g3_i1|m.47926/c100573_g2_i1|m.35194/c98318_g1_i1|m.29161/c139116_g1_i1|m.98515/c29342_g2_i1|m.3268/c100573_g3_i1|m.35195/c109924_g1_i3|m.82988/c101515_g1_i1|m.37973/c109845_g3_i1|m.82373/c110732_g1_i2|m.89648/c109845_g2_i1|m.82369/c106509_g3_i1|m.59952/c109768_g6_i1|m.81775/c106802_g1_i2|m.61685/c15214_g1_i1|m.1560/c111086_g3_i1|m.92774/c108987_g2_i3|m.76192/c98004_g6_i1|m.28466/c13355_g1…	98
GO:0010075	regulation of meristem growth	122/3804	406/43701	2.94427e-35	2.22082e-32	1.97509e-32	c110461_g2_i9|m.87262/c104829_g2_i1|m.51116/c105120_g2_i1|m.52641/c106293_g4_i2|m.58763/c110461_g2_i5|m.87253/c107987_g6_i1|m.69430/c107987_g5_i1|m.69428/c109451_g8_i2|m.79432/c105668_g5_i1|m.55386/c111074_g2_i1|m.92621/c105881_g9_i1|m.56563/c106764_g1_i6|m.61458/c109590_g2_i3|m.80585/c87419_g1_i1|m.15239/c108263_g9_i1|m.71179/c85870_g2_i1|m.14188/c22275_g1_i1|m.2385/c107901_g3_i1|m.68673/c175781…	122
GO:0010082	regulation of root meristem growth	91/3804	266/43701	2.08965e-31	1.37917e-28	1.22657e-28	c110461_g2_i9|m.87262/c104829_g2_i1|m.51116/c105120_g2_i1|m.52641/c106293_g4_i2|m.58763/c110461_g2_i5|m.87253/c107987_g6_i1|m.69430/c107987_g5_i1|m.69428/c109451_g8_i2|m.79432/c105668_g5_i1|m.55386/c111074_g2_i1|m.92621/c105881_g9_i1|m.56563/c106764_g1_i6|m.61458/c109590_g2_i3|m.80585/c87419_g1_i1|m.15239/c108263_g9_i1|m.71179/c85870_g2_i1|m.14188/c22275_g1_i1|m.2385/c107901_g3_i1|m.68673/c175781…	91
GO:0032412	regulation of ion transmembrane transporter activity	115/3804	422/43701	4.54813e-29	2.66824e-26	2.37301e-26	c101230_g2_i3|m.37065/c104914_g5_i2|m.51528/c110875_g1_i3|m.90985/c90107_g1_i1|m.17049/c101230_g3_i2|m.37056/c110408_g2_i1|m.86753/c109550_g1_i7|m.80269/c101007_g1_i1|m.36407/c108589_g1_i1|m.73594/c110926_g1_i1|m.91432/c105922_g2_i1|m.56787/c110926_g1_i6|m.91441/c110926_g1_i4|m.91437/c107470_g3_i2|m.65850/c105922_g3_i1|m.56788/c110926_g2_i2|m.91440/c110926_g2_i1|m.91434/c40479_g1_i1|m.4323/c62392…	115
GO:0022898	regulation of transmembrane transporter activity	115/3804	425/43701	9.02336e-29	4.76433e-26	4.23718e-26	c101230_g2_i3|m.37065/c104914_g5_i2|m.51528/c110875_g1_i3|m.90985/c90107_g1_i1|m.17049/c101230_g3_i2|m.37056/c110408_g2_i1|m.86753/c109550_g1_i7|m.80269/c101007_g1_i1|m.36407/c108589_g1_i1|m.73594/c110926_g1_i1|m.91432/c105922_g2_i1|m.56787/c110926_g1_i6|m.91441/c110926_g1_i4|m.91437/c107470_g3_i2|m.65850/c105922_g3_i1|m.56788/c110926_g2_i2|m.91440/c110926_g2_i1|m.91434/c40479_g1_i1|m.4323/c62392…	115
GO:0032409	regulation of transporter activity	115/3804	429/43701	2.22225e-28	1.06668e-25	9.48657e-26	c101230_g2_i3|m.37065/c104914_g5_i2|m.51528/c110875_g1_i3|m.90985/c90107_g1_i1|m.17049/c101230_g3_i2|m.37056/c110408_g2_i1|m.86753/c109550_g1_i7|m.80269/c101007_g1_i1|m.36407/c108589_g1_i1|m.73594/c110926_g1_i1|m.91432/c105922_g2_i1|m.56787/c110926_g1_i6|m.91441/c110926_g1_i4|m.91437/c107470_g3_i2|m.65850/c105922_g3_i1|m.56788/c110926_g2_i2|m.91440/c110926_g2_i1|m.91434/c40479_g1_i1|m.4323/c62392…	115
GO:0052652	cyclic purine nucleotide metabolic process	77/3804	217/43701	5.50095e-28	2.42042e-25	2.15261e-25	c110514_g1_i2|m.87701/c110514_g5_i2|m.87705/c98019_g5_i2|m.28500/c110514_g5_i1|m.87703/c163025_g1_i1|m.100862/c87045_g1_i1|m.15110/c119694_g1_i1|m.96320/c108266_g8_i1|m.71200/c109220_g2_i7|m.77867/c108266_g7_i1|m.71197/c109220_g2_i3|m.77858/c109220_g2_i1|m.77851/c110151_g2_i1|m.84787/c111074_g3_i1|m.92622/c111074_g3_i3|m.92635/c110151_g2_i5|m.84795/c111074_g3_i4|m.92646/c108263_g5_i1|m.71167/c108…	77
GO:1900865	chloroplast RNA modification	114/3804	433/43701	2.09621e-27	8.51386e-25	7.57183e-25	c98822_g2_i1|m.30503/c108091_g6_i1|m.70087/c137764_g1_i1|m.98370/c93335_g1_i1|m.20146/c106654_g9_i1|m.60803/c30419_g1_i1|m.3444/c87097_g3_i1|m.15139/c153008_g1_i1|m.99896/c104973_g9_i1|m.51829/c108091_g2_i1|m.70079/c23543_g1_i1|m.2543/c182109_g1_i1|m.102801/c162128_g1_i1|m.100695/c106654_g4_i1|m.60793/c106654_g4_i2|m.60797/c106556_g3_i1|m.60196/c108091_g9_i1|m.70090/c110588_g8_i1|m.88371/c77685_g…	114
GO:0009190	cyclic nucleotide biosynthetic process	77/3804	222/43701	3.05125e-27	1.15076e-24	1.02343e-24	c110514_g1_i2|m.87701/c110514_g5_i2|m.87705/c98019_g5_i2|m.28500/c110514_g5_i1|m.87703/c163025_g1_i1|m.100862/c87045_g1_i1|m.15110/c119694_g1_i1|m.96320/c108266_g8_i1|m.71200/c109220_g2_i7|m.77867/c108266_g7_i1|m.71197/c109220_g2_i3|m.77858/c109220_g2_i1|m.77851/c110151_g2_i1|m.84787/c111074_g3_i1|m.92622/c111074_g3_i3|m.92635/c110151_g2_i5|m.84795/c111074_g3_i4|m.92646/c108263_g5_i1|m.71167/c108…	77
GO:0006171	cAMP biosynthetic process	73/3804	203/43701	5.0184e-27	1.76648e-24	1.57102e-24	c110514_g1_i2|m.87701/c110514_g5_i2|m.87705/c98019_g5_i2|m.28500/c110514_g5_i1|m.87703/c163025_g1_i1|m.100862/c87045_g1_i1|m.15110/c119694_g1_i1|m.96320/c108266_g8_i1|m.71200/c109220_g2_i7|m.77867/c108266_g7_i1|m.71197/c109220_g2_i3|m.77858/c109220_g2_i1|m.77851/c110151_g2_i1|m.84787/c111074_g3_i1|m.92622/c111074_g3_i3|m.92635/c110151_g2_i5|m.84795/c111074_g3_i4|m.92646/c108263_g5_i1|m.71167/c108…	73
GO:1905421	regulation of plant organ morphogenesis	89/3804	297/43701	5.34249e-26	1.76302e-23	1.56795e-23	c110257_g2_i5|m.85658/c110257_g2_i11|m.85666/c123324_g1_i1|m.96984/c98318_g1_i1|m.29161/c73376_g1_i1|m.9813/c100573_g3_i1|m.35195/c109924_g1_i3|m.82988/c101515_g1_i1|m.37973/c109845_g4_i1|m.82374/c109845_g2_i1|m.82369/c108987_g2_i3|m.76192/c98004_g2_i1|m.28460/c109696_g6_i2|m.81216/c105531_g4_i1|m.54790/c105531_g6_i1|m.54792/c107529_g1_i1|m.66178/c105531_g5_i1|m.54791/c109076_g1_i1|m.76864/c10429…	89
GO:0044426	cell wall part	73/3804	215/43701	2.98308e-25	9.2651e-23	8.23996e-23	c110257_g2_i5|m.85658/c110257_g2_i11|m.85666/c98318_g1_i1|m.29161/c100573_g3_i1|m.35195/c109924_g1_i3|m.82988/c101515_g1_i1|m.37973/c109845_g4_i1|m.82374/c109845_g2_i1|m.82369/c108987_g2_i3|m.76192/c109696_g6_i2|m.81216/c105531_g4_i1|m.54790/c105531_g6_i1|m.54792/c107529_g1_i1|m.66178/c105531_g5_i1|m.54791/c109076_g1_i1|m.76864/c104298_g1_i1|m.48778/c104298_g2_i1|m.48779/c111243_g2_i1|m.94167/c11…	73
GO:0044462	external encapsulating structure part	74/3804	224/43701	9.6955e-25	2.84401e-22	2.52934e-22	c110257_g2_i5|m.85658/c110257_g2_i11|m.85666/c98318_g1_i1|m.29161/c100573_g3_i1|m.35195/c109924_g1_i3|m.82988/c101515_g1_i1|m.37973/c109845_g4_i1|m.82374/c109845_g2_i1|m.82369/c108987_g2_i3|m.76192/c109696_g6_i2|m.81216/c105531_g4_i1|m.54790/c105531_g6_i1|m.54792/c107529_g1_i1|m.66178/c105531_g5_i1|m.54791/c109076_g1_i1|m.76864/c104298_g1_i1|m.48778/c104298_g2_i1|m.48779/c111243_g2_i1|m.94167/c11…	74
GO:0046058	cAMP metabolic process	73/3804	219/43701	1.07623e-24	2.92504e-22	2.60139e-22	c110514_g1_i2|m.87701/c110514_g5_i2|m.87705/c98019_g5_i2|m.28500/c110514_g5_i1|m.87703/c163025_g1_i1|m.100862/c87045_g1_i1|m.15110/c119694_g1_i1|m.96320/c108266_g8_i1|m.71200/c109220_g2_i7|m.77867/c108266_g7_i1|m.71197/c109220_g2_i3|m.77858/c109220_g2_i1|m.77851/c110151_g2_i1|m.84787/c111074_g3_i1|m.92622/c111074_g3_i3|m.92635/c110151_g2_i5|m.84795/c111074_g3_i4|m.92646/c108263_g5_i1|m.71167/c108…	73
GO:0048226	Casparian strip	68/3804	193/43701	1.10797e-24	2.92504e-22	2.60139e-22	c110257_g2_i5|m.85658/c110257_g2_i11|m.85666/c98318_g1_i1|m.29161/c100573_g3_i1|m.35195/c109924_g1_i3|m.82988/c101515_g1_i1|m.37973/c109845_g4_i1|m.82374/c109845_g2_i1|m.82369/c108987_g2_i3|m.76192/c109696_g6_i2|m.81216/c105531_g4_i1|m.54790/c105531_g6_i1|m.54792/c107529_g1_i1|m.66178/c105531_g5_i1|m.54791/c109076_g1_i1|m.76864/c104298_g1_i1|m.48778/c104298_g2_i1|m.48779/c111243_g2_i1|m.94167/c11…	68
GO:0009187	cyclic nucleotide metabolic process	77/3804	243/43701	2.20303e-24	5.53905e-22	4.92618e-22	c110514_g1_i2|m.87701/c110514_g5_i2|m.87705/c98019_g5_i2|m.28500/c110514_g5_i1|m.87703/c163025_g1_i1|m.100862/c87045_g1_i1|m.15110/c119694_g1_i1|m.96320/c108266_g8_i1|m.71200/c109220_g2_i7|m.77867/c108266_g7_i1|m.71197/c109220_g2_i3|m.77858/c109220_g2_i1|m.77851/c110151_g2_i1|m.84787/c111074_g3_i1|m.92622/c111074_g3_i3|m.92635/c110151_g2_i5|m.84795/c111074_g3_i4|m.92646/c108263_g5_i1|m.71167/c108…	77
GO:0042659	regulation of cell fate specification	69/3804	208/43701	2.75735e-23	6.61764e-21	5.88543e-21	c110257_g2_i5|m.85658/c110257_g2_i11|m.85666/c98318_g1_i1|m.29161/c100573_g3_i1|m.35195/c109924_g1_i3|m.82988/c101515_g1_i1|m.37973/c109845_g4_i1|m.82374/c109845_g2_i1|m.82369/c108987_g2_i3|m.76192/c109696_g6_i2|m.81216/c105531_g4_i1|m.54790/c105531_g6_i1|m.54792/c107529_g1_i1|m.66178/c105531_g5_i1|m.54791/c109076_g1_i1|m.76864/c104298_g1_i1|m.48778/c104298_g2_i1|m.48779/c111243_g2_i1|m.94167/c11…	69
GO:0010114	response to red light	109/3804	450/43701	4.25043e-23	9.75751e-21	8.67788e-21	c110461_g2_i9|m.87262/c104829_g2_i1|m.51116/c107987_g4_i1|m.69426/c106293_g4_i2|m.58763/c105120_g3_i1|m.52643/c110461_g2_i5|m.87253/c107987_g4_i2|m.69427/c107987_g6_i1|m.69430/c107987_g5_i1|m.69428/c106346_g1_i1|m.59050/c107987_g4_i4|m.69431/c109451_g8_i2|m.79432/c111074_g2_i1|m.92621/c84894_g1_i1|m.13607/c106862_g5_i1|m.62035/c105881_g7_i2|m.56564/c105881_g8_i1|m.56561/c109590_g2_i3|m.80585/c110…	109
GO:0034765	regulation of ion transmembrane transport	115/3804	490/43701	4.46991e-23	9.83381e-21	8.74573e-21	c101230_g2_i3|m.37065/c104914_g5_i2|m.51528/c110875_g1_i3|m.90985/c90107_g1_i1|m.17049/c101230_g3_i2|m.37056/c110408_g2_i1|m.86753/c109550_g1_i7|m.80269/c101007_g1_i1|m.36407/c108589_g1_i1|m.73594/c110926_g1_i1|m.91432/c105922_g2_i1|m.56787/c110926_g1_i6|m.91441/c110926_g1_i4|m.91437/c107470_g3_i2|m.65850/c105922_g3_i1|m.56788/c110926_g2_i2|m.91440/c110926_g2_i1|m.91434/c40479_g1_i1|m.4323/c62392…	115
GO:0090708	NA	68/3804	206/43701	7.83566e-23	1.65489e-20	1.47178e-20	c110257_g2_i5|m.85658/c110257_g2_i11|m.85666/c98318_g1_i1|m.29161/c100573_g3_i1|m.35195/c109924_g1_i3|m.82988/c101515_g1_i1|m.37973/c109845_g4_i1|m.82374/c109845_g2_i1|m.82369/c108987_g2_i3|m.76192/c109696_g6_i2|m.81216/c105531_g4_i1|m.54790/c105531_g6_i1|m.54792/c107529_g1_i1|m.66178/c105531_g5_i1|m.54791/c109076_g1_i1|m.76864/c104298_g1_i1|m.48778/c104298_g2_i1|m.48779/c111243_g2_i1|m.94167/c11…	68
GO:2000067	regulation of root morphogenesis	69/3804	212/43701	9.49238e-23	1.92768e-20	1.71439e-20	c110257_g2_i5|m.85658/c110257_g2_i11|m.85666/c98318_g1_i1|m.29161/c100573_g3_i1|m.35195/c109924_g1_i3|m.82988/c101515_g1_i1|m.37973/c109845_g4_i1|m.82374/c109845_g2_i1|m.82369/c108987_g2_i3|m.76192/c109696_g6_i2|m.81216/c105531_g4_i1|m.54790/c105531_g6_i1|m.54792/c107529_g1_i1|m.66178/c105531_g5_i1|m.54791/c109076_g1_i1|m.76864/c104298_g1_i1|m.48778/c104298_g2_i1|m.48779/c111243_g2_i1|m.94167/c11…	69
GO:0010359	regulation of anion channel activity	83/3804	295/43701	2.34986e-22	4.59529e-20	4.08684e-20	c100573_g2_i1|m.35194/c98318_g1_i1|m.29161/c139116_g1_i1|m.98515/c29342_g2_i1|m.3268/c100573_g3_i1|m.35195/c109924_g1_i3|m.82988/c101515_g1_i1|m.37973/c109845_g3_i1|m.82373/c110732_g1_i2|m.89648/c109845_g2_i1|m.82369/c111086_g3_i1|m.92774/c108987_g2_i3|m.76192/c98004_g6_i1|m.28466/c13355_g1_i1|m.1308/c111243_g2_i1|m.94167/c100431_g1_i1|m.34834/c95692_g3_i1|m.23818/c110867_g2_i1|m.90948/c106352_g4…	83
GO:0009531	secondary cell wall	68/3804	210/43701	2.6712e-22	5.03711e-20	4.47978e-20	c110257_g2_i5|m.85658/c110257_g2_i11|m.85666/c98318_g1_i1|m.29161/c100573_g3_i1|m.35195/c109924_g1_i3|m.82988/c101515_g1_i1|m.37973/c109845_g4_i1|m.82374/c109845_g2_i1|m.82369/c108987_g2_i3|m.76192/c109696_g6_i2|m.81216/c105531_g4_i1|m.54790/c105531_g6_i1|m.54792/c107529_g1_i1|m.66178/c105531_g5_i1|m.54791/c109076_g1_i1|m.76864/c104298_g1_i1|m.48778/c104298_g2_i1|m.48779/c111243_g2_i1|m.94167/c11…	68
GO:0006313	transposition, DNA-mediated	63/3804	190/43701	2.22541e-21	3.79276e-19	3.37311e-19	c121966_g1_i1|m.96801/c93129_g1_i1|m.19911/c99688_g1_i1|m.32606/c104513_g2_i1|m.49696/c109613_g2_i5|m.80698/c111416_g1_i1|m.95492/c110893_g5_i1|m.91149/c105303_g3_i1|m.53661/c97271_g2_i1|m.26762/c109242_g7_i2|m.77987/c2425_g1_i1|m.132/c96120_g1_i1|m.24541/c168680_g1_i1|m.101429/c25533_g1_i2|m.2739/c106736_g12_i2|m.61252/c23518_g1_i1|m.2537/c61589_g2_i1|m.6099/c107920_g6_i2|m.68876/c62316_g1_i1|m.…	63
GO:0001171	reverse transcription	69/3804	223/43701	2.37048e-21	3.79276e-19	3.37311e-19	c101363_g2_i1|m.37518/c110076_g4_i1|m.84197/c73204_g1_i1|m.9762/c105148_g2_i1|m.52811/c109330_g3_i1|m.78544/c89791_g1_i1|m.16793/c64792_g1_i1|m.6975/c148582_g1_i1|m.99336/c27446_g1_i1|m.2908/c110358_g6_i1|m.86394/c107139_g4_i1|m.63644/c99688_g1_i1|m.32606/c90086_g1_i1|m.17037/c99286_g3_i1|m.31744/c107139_g4_i1|m.63645/c147635_g1_i1|m.99105/c88443_g2_i1|m.15781/c64486_g1_i1|m.6913/c72463_g1_i1|m.9…	69
GO:0009036	Type II site-specific deoxyribonuclease activity	69/3804	223/43701	2.37048e-21	3.79276e-19	3.37311e-19	c101363_g2_i1|m.37518/c110076_g4_i1|m.84197/c73204_g1_i1|m.9762/c105148_g2_i1|m.52811/c109330_g3_i1|m.78544/c89791_g1_i1|m.16793/c64792_g1_i1|m.6975/c148582_g1_i1|m.99336/c27446_g1_i1|m.2908/c110358_g6_i1|m.86394/c107139_g4_i1|m.63644/c99688_g1_i1|m.32606/c90086_g1_i1|m.17037/c99286_g3_i1|m.31744/c107139_g4_i1|m.63645/c147635_g1_i1|m.99105/c88443_g2_i1|m.15781/c64486_g1_i1|m.6913/c72463_g1_i1|m.9…	69
GO:0015666	restriction endodeoxyribonuclease activity	69/3804	223/43701	2.37048e-21	3.79276e-19	3.37311e-19	c101363_g2_i1|m.37518/c110076_g4_i1|m.84197/c73204_g1_i1|m.9762/c105148_g2_i1|m.52811/c109330_g3_i1|m.78544/c89791_g1_i1|m.16793/c64792_g1_i1|m.6975/c148582_g1_i1|m.99336/c27446_g1_i1|m.2908/c110358_g6_i1|m.86394/c107139_g4_i1|m.63644/c99688_g1_i1|m.32606/c90086_g1_i1|m.17037/c99286_g3_i1|m.31744/c107139_g4_i1|m.63645/c147635_g1_i1|m.99105/c88443_g2_i1|m.15781/c64486_g1_i1|m.6913/c72463_g1_i1|m.9…	69
GO:0032199	reverse transcription involved in RNA-mediated transposition	69/3804	223/43701	2.37048e-21	3.79276e-19	3.37311e-19	c101363_g2_i1|m.37518/c110076_g4_i1|m.84197/c73204_g1_i1|m.9762/c105148_g2_i1|m.52811/c109330_g3_i1|m.78544/c89791_g1_i1|m.16793/c64792_g1_i1|m.6975/c148582_g1_i1|m.99336/c27446_g1_i1|m.2908/c110358_g6_i1|m.86394/c107139_g4_i1|m.63644/c99688_g1_i1|m.32606/c90086_g1_i1|m.17037/c99286_g3_i1|m.31744/c107139_g4_i1|m.63645/c147635_g1_i1|m.99105/c88443_g2_i1|m.15781/c64486_g1_i1|m.6913/c72463_g1_i1|m.9…	69
GO:1903959	regulation of anion transmembrane transport	83/3804	305/43701	2.46692e-21	3.83098e-19	3.40709e-19	c100573_g2_i1|m.35194/c98318_g1_i1|m.29161/c139116_g1_i1|m.98515/c29342_g2_i1|m.3268/c100573_g3_i1|m.35195/c109924_g1_i3|m.82988/c101515_g1_i1|m.37973/c109845_g3_i1|m.82373/c110732_g1_i2|m.89648/c109845_g2_i1|m.82369/c111086_g3_i1|m.92774/c108987_g2_i3|m.76192/c98004_g6_i1|m.28466/c13355_g1_i1|m.1308/c111243_g2_i1|m.94167/c100431_g1_i1|m.34834/c95692_g3_i1|m.23818/c110867_g2_i1|m.90948/c106352_g4…	83
GO:0010204	defense response signaling pathway, resistance gene-independent	61/3804	180/43701	2.6862e-21	4.05233e-19	3.60395e-19	c100573_g2_i1|m.35194/c107529_g5_i1|m.66186/c123324_g1_i1|m.96984/c98318_g1_i1|m.29161/c73376_g1_i1|m.9813/c29342_g2_i1|m.3268/c109845_g4_i1|m.82374/c108987_g2_i2|m.76190/c98004_g2_i1|m.28460/c142073_g1_i1|m.98782/c98004_g6_i1|m.28466/c85817_g1_i1|m.14140/c98004_g4_i2|m.28464/c110867_g2_i1|m.90948/c106352_g4_i1|m.59099/c104117_g1_i1|m.47932/c104117_g7_i1|m.47941/c98178_g1_i1|m.28873/c104117_g7_i2…	61
GO:0010453	regulation of cell fate commitment	69/3804	226/43701	5.45987e-21	8.00781e-19	7.12178e-19	c110257_g2_i5|m.85658/c110257_g2_i11|m.85666/c98318_g1_i1|m.29161/c100573_g3_i1|m.35195/c109924_g1_i3|m.82988/c101515_g1_i1|m.37973/c109845_g4_i1|m.82374/c109845_g2_i1|m.82369/c108987_g2_i3|m.76192/c109696_g6_i2|m.81216/c105531_g4_i1|m.54790/c105531_g6_i1|m.54792/c107529_g1_i1|m.66178/c105531_g5_i1|m.54791/c109076_g1_i1|m.76864/c104298_g1_i1|m.48778/c104298_g2_i1|m.48779/c111243_g2_i1|m.94167/c11…	69
GO:0006278	RNA-dependent DNA biosynthetic process	97/3804	399/43701	7.83967e-21	1.11874e-18	9.94958e-19	c109691_g1_i1|m.81172/c110930_g1_i2|m.91466/c111349_g1_i1|m.94968/c106303_g6_i1|m.58801/c106303_g6_i7|m.58806/c60947_g1_i1|m.6037/c105885_g2_i1|m.56583/c82703_g1_i1|m.12456/c105885_g2_i1|m.56584/c80545_g2_i1|m.11667/c62392_g1_i1|m.6368/c110957_g10_i2|m.91664/c110957_g10_i1|m.91663/c62392_g2_i1|m.6369/c101363_g2_i1|m.37518/c110076_g4_i1|m.84197/c73204_g1_i1|m.9762/c105148_g2_i1|m.52811/c109330_g3_…	97
GO:0006833	water transport	79/3804	294/43701	5.16294e-20	7.17377e-18	6.38002e-18	c110257_g2_i5|m.85658/c110257_g2_i11|m.85666/c123324_g1_i1|m.96984/c98318_g1_i1|m.29161/c73376_g1_i1|m.9813/c100573_g3_i1|m.35195/c109924_g1_i3|m.82988/c101515_g1_i1|m.37973/c109845_g4_i1|m.82374/c109845_g2_i1|m.82369/c108987_g2_i3|m.76192/c98004_g2_i1|m.28460/c109696_g6_i2|m.81216/c105531_g4_i1|m.54790/c105531_g6_i1|m.54792/c107529_g1_i1|m.66178/c105531_g5_i1|m.54791/c104298_g1_i1|m.48778/c11504…	79
GO:0042044	fluid transport	79/3804	295/43701	6.45618e-20	8.74068e-18	7.77356e-18	c110257_g2_i5|m.85658/c110257_g2_i11|m.85666/c123324_g1_i1|m.96984/c98318_g1_i1|m.29161/c73376_g1_i1|m.9813/c100573_g3_i1|m.35195/c109924_g1_i3|m.82988/c101515_g1_i1|m.37973/c109845_g4_i1|m.82374/c109845_g2_i1|m.82369/c108987_g2_i3|m.76192/c98004_g2_i1|m.28460/c109696_g6_i2|m.81216/c105531_g4_i1|m.54790/c105531_g6_i1|m.54792/c107529_g1_i1|m.66178/c105531_g5_i1|m.54791/c104298_g1_i1|m.48778/c11504…	79
GO:1903224	regulation of endodermal cell differentiation	54/3804	155/43701	1.1912e-19	1.57238e-17	1.3984e-17	c110257_g2_i5|m.85658/c110257_g2_i11|m.85666/c98318_g1_i1|m.29161/c100573_g3_i1|m.35195/c109924_g1_i3|m.82988/c101515_g1_i1|m.37973/c109845_g4_i1|m.82374/c109845_g2_i1|m.82369/c108987_g2_i3|m.76192/c109696_g6_i2|m.81216/c105531_g6_i1|m.54792/c107529_g1_i1|m.66178/c105531_g5_i1|m.54791/c104298_g1_i1|m.48778/c11504_g1_i1|m.1019/c109916_g2_i4|m.82929/c109916_g2_i2|m.82923/c109916_g2_i3|m.82928/c1099…	54
GO:0044070	regulation of anion transport	87/3804	352/43701	2.51693e-19	3.24132e-17	2.88268e-17	c111174_g4_i2|m.93623/c100573_g2_i1|m.35194/c98318_g1_i1|m.29161/c139116_g1_i1|m.98515/c29342_g2_i1|m.3268/c100573_g3_i1|m.35195/c109924_g1_i3|m.82988/c101515_g1_i1|m.37973/c109845_g3_i1|m.82373/c110732_g1_i2|m.89648/c109845_g2_i1|m.82369/c111086_g3_i1|m.92774/c108987_g2_i3|m.76192/c98004_g6_i1|m.28466/c13355_g1_i1|m.1308/c35192_g2_i1|m.3753/c111243_g2_i1|m.94167/c100431_g1_i1|m.34834/c95692_g3_i…	87
GO:0031425	chloroplast RNA processing	91/3804	379/43701	2.98525e-19	3.75289e-17	3.33765e-17	c106654_g9_i1|m.60803/c13432_g1_i1|m.1313/c98822_g1_i1|m.30502/c153008_g1_i1|m.99896/c165937_g1_i1|m.101211/c124941_g1_i1|m.97148/c108091_g2_i1|m.70079/c69011_g1_i1|m.8115/c23543_g1_i1|m.2543/c182109_g1_i1|m.102801/c110588_g8_i1|m.88371/c180176_g1_i1|m.102626/c109028_g4_i1|m.76573/c104576_g2_i1|m.49955/c87312_g1_i1|m.15213/c151526_g1_i1|m.99737/c76756_g1_i1|m.10552/c31796_g1_i1|m.3582/c1032_g1_i1…	91
GO:1900426	positive regulation of defense response to bacterium	69/3804	244/43701	5.76105e-19	7.07403e-17	6.29132e-17	c107470_g3_i6|m.65857/c84898_g1_i1|m.13616/c110731_g2_i1|m.89636/c108685_g3_i1|m.74186/c111169_g3_i1|m.93563/c108685_g4_i2|m.74190/c108685_g4_i1|m.74187/c110378_g4_i1|m.86543/c108685_g5_i2|m.74192/c109866_g2_i1|m.82528/c106023_g1_i1|m.57225/c106352_g2_i1|m.59097/c106804_g3_i1|m.61716/c106804_g1_i1|m.61714/c106804_g2_i1|m.61715/c164198_g1_i1|m.101020/c108175_g4_i1|m.70621/c104117_g1_i1|m.47932/c10…	69
GO:0016888	endodeoxyribonuclease activity, producing 5'-phosphomonoesters	69/3804	251/43701	3.04707e-18	3.65648e-16	3.25191e-16	c101363_g2_i1|m.37518/c110076_g4_i1|m.84197/c73204_g1_i1|m.9762/c105148_g2_i1|m.52811/c109330_g3_i1|m.78544/c89791_g1_i1|m.16793/c64792_g1_i1|m.6975/c148582_g1_i1|m.99336/c27446_g1_i1|m.2908/c110358_g6_i1|m.86394/c107139_g4_i1|m.63644/c99688_g1_i1|m.32606/c90086_g1_i1|m.17037/c99286_g3_i1|m.31744/c107139_g4_i1|m.63645/c147635_g1_i1|m.99105/c88443_g2_i1|m.15781/c64486_g1_i1|m.6913/c72463_g1_i1|m.9…	69
GO:0030104	water homeostasis	64/3804	224/43701	6.01189e-18	7.05395e-16	6.27346e-16	c110257_g2_i5|m.85658/c110257_g2_i11|m.85666/c98318_g1_i1|m.29161/c100573_g3_i1|m.35195/c109924_g1_i3|m.82988/c101515_g1_i1|m.37973/c109845_g4_i1|m.82374/c109845_g2_i1|m.82369/c108987_g2_i3|m.76192/c109696_g6_i2|m.81216/c105531_g6_i1|m.54792/c107529_g1_i1|m.66178/c105531_g5_i1|m.54791/c104298_g1_i1|m.48778/c11504_g1_i1|m.1019/c109916_g2_i4|m.82929/c109916_g2_i2|m.82923/c109916_g2_i3|m.82928/c1099…	64
GO:0010470	regulation of gastrulation	54/3804	171/43701	1.79344e-17	2.05856e-15	1.83079e-15	c110257_g2_i5|m.85658/c110257_g2_i11|m.85666/c98318_g1_i1|m.29161/c100573_g3_i1|m.35195/c109924_g1_i3|m.82988/c101515_g1_i1|m.37973/c109845_g4_i1|m.82374/c109845_g2_i1|m.82369/c108987_g2_i3|m.76192/c109696_g6_i2|m.81216/c105531_g6_i1|m.54792/c107529_g1_i1|m.66178/c105531_g5_i1|m.54791/c104298_g1_i1|m.48778/c11504_g1_i1|m.1019/c109916_g2_i4|m.82929/c109916_g2_i2|m.82923/c109916_g2_i3|m.82928/c1099…	54
GO:0001708	cell fate specification	98/3804	455/43701	3.56689e-17	4.00705e-15	3.56369e-15	c109691_g4_i1|m.81176/c109536_g2_i4|m.80076/c110257_g2_i5|m.85658/c110257_g2_i11|m.85666/c111090_g1_i1|m.92876/c106561_g1_i1|m.60221/c110876_g2_i4|m.91004/c109369_g2_i1|m.78832/c109141_g4_i2|m.77327/c98318_g1_i1|m.29161/c100573_g3_i1|m.35195/c109924_g1_i3|m.82988/c101515_g1_i1|m.37973/c109845_g4_i1|m.82374/c109845_g2_i1|m.82369/c76736_g2_i1|m.10533/c111246_g1_i4|m.94192/c111251_g1_i1|m.94217/c108…	98
GO:0035987	endodermal cell differentiation	54/3804	176/43701	7.40635e-17	8.14699e-15	7.24556e-15	c110257_g2_i5|m.85658/c110257_g2_i11|m.85666/c98318_g1_i1|m.29161/c100573_g3_i1|m.35195/c109924_g1_i3|m.82988/c101515_g1_i1|m.37973/c109845_g4_i1|m.82374/c109845_g2_i1|m.82369/c108987_g2_i3|m.76192/c109696_g6_i2|m.81216/c105531_g6_i1|m.54792/c107529_g1_i1|m.66178/c105531_g5_i1|m.54791/c104298_g1_i1|m.48778/c11504_g1_i1|m.1019/c109916_g2_i4|m.82929/c109916_g2_i2|m.82923/c109916_g2_i3|m.82928/c1099…	54
GO:0002229	defense response to oomycetes	103/3804	496/43701	7.98066e-17	8.59957e-15	7.64806e-15	c107470_g3_i6|m.65857/c84898_g1_i1|m.13616/c105241_g10_i2|m.53270/c105241_g4_i1|m.53264/c109590_g3_i3|m.80590/c77336_g2_i1|m.10732/c13129_g2_i1|m.1262/c110731_g2_i1|m.89636/c69753_g1_i1|m.8316/c109141_g4_i4|m.77332/c105668_g6_i1|m.55387/c107314_g1_i1|m.64815/c109372_g3_i1|m.78873/c169026_g1_i1|m.101455/c22275_g1_i1|m.2385/c107987_g1_i1|m.69419/c110946_g1_i3|m.91594/c110263_g4_i2|m.85691/c107500_g…	103
GO:0044826	viral genome integration into host DNA	27/3804	50/43701	3.17213e-16	3.34977e-14	2.97913e-14	c106627_g5_i1|m.60652/c93238_g3_i1|m.20049/c80585_g3_i1|m.11680/c91708_g2_i1|m.18593/c110234_g7_i1|m.85469/c137846_g1_i1|m.98382/c90961_g1_i2|m.17881/c106981_g2_i2|m.62738/c51404_g1_i1|m.5408/c110988_g1_i1|m.91949/c77377_g1_i1|m.10750/c59126_g1_i1|m.5767/c100255_g3_i1|m.34346/c120581_g1_i1|m.96525/c97949_g1_i2|m.28359/c110914_g4_i2|m.91336/c96109_g1_i1|m.24532/c99963_g5_i1|m.33435/c8649_g1_i1|m.6…	27
GO:0002833	positive regulation of response to biotic stimulus	73/3804	303/43701	8.05553e-16	8.33984e-14	7.41707e-14	c107470_g3_i6|m.65857/c84898_g1_i1|m.13616/c110731_g2_i1|m.89636/c110206_g2_i2|m.85226/c109768_g6_i1|m.81775/c111238_g2_i3|m.94135/c15214_g1_i1|m.1560/c108685_g3_i1|m.74186/c111169_g3_i1|m.93563/c108685_g4_i2|m.74190/c108685_g4_i1|m.74187/c110378_g4_i1|m.86543/c108685_g5_i2|m.74192/c109866_g2_i1|m.82528/c106023_g1_i1|m.57225/c106352_g2_i1|m.59097/c106804_g3_i1|m.61716/c106804_g1_i1|m.61714/c10680…	73
GO:0030011	maintenance of cell polarity	43/3804	125/43701	1.00806e-15	1.02357e-13	9.10318e-14	c101230_g2_i3|m.37065/c110875_g1_i3|m.90985/c90107_g1_i1|m.17049/c110926_g2_i2|m.91440/c110926_g2_i1|m.91434/c62392_g1_i1|m.6368/c109536_g2_i4|m.80076/c110731_g1_i3|m.89639/c110731_g1_i4|m.89640/c107738_g1_i1|m.67664/c107738_g1_i4|m.67668/c110257_g2_i5|m.85658/c110257_g2_i11|m.85666/c111090_g1_i1|m.92876/c106561_g1_i1|m.60221/c110876_g2_i4|m.91004/c109369_g2_i1|m.78832/c109141_g4_i2|m.77327/c1081…	43
GO:0001706	endoderm formation	54/3804	186/43701	1.05172e-15	1.04775e-13	9.31819e-14	c110257_g2_i5|m.85658/c110257_g2_i11|m.85666/c98318_g1_i1|m.29161/c100573_g3_i1|m.35195/c109924_g1_i3|m.82988/c101515_g1_i1|m.37973/c109845_g4_i1|m.82374/c109845_g2_i1|m.82369/c108987_g2_i3|m.76192/c109696_g6_i2|m.81216/c105531_g6_i1|m.54792/c107529_g1_i1|m.66178/c105531_g5_i1|m.54791/c104298_g1_i1|m.48778/c11504_g1_i1|m.1019/c109916_g2_i4|m.82929/c109916_g2_i2|m.82923/c109916_g2_i3|m.82928/c1099…	54
GO:0035090	maintenance of apical/basal cell polarity	40/3804	110/43701	1.1273e-15	1.08221e-13	9.6247e-14	c101230_g2_i3|m.37065/c110875_g1_i3|m.90985/c90107_g1_i1|m.17049/c110926_g2_i2|m.91440/c110926_g2_i1|m.91434/c62392_g1_i1|m.6368/c109536_g2_i4|m.80076/c110731_g1_i3|m.89639/c110731_g1_i4|m.89640/c107738_g1_i1|m.67664/c107738_g1_i4|m.67668/c110257_g2_i5|m.85658/c110257_g2_i11|m.85666/c111090_g1_i1|m.92876/c106561_g1_i1|m.60221/c110876_g2_i4|m.91004/c109369_g2_i1|m.78832/c109141_g4_i2|m.77327/c1081…	40
GO:0045199	maintenance of epithelial cell apical/basal polarity	40/3804	110/43701	1.1273e-15	1.08221e-13	9.6247e-14	c101230_g2_i3|m.37065/c110875_g1_i3|m.90985/c90107_g1_i1|m.17049/c110926_g2_i2|m.91440/c110926_g2_i1|m.91434/c62392_g1_i1|m.6368/c109536_g2_i4|m.80076/c110731_g1_i3|m.89639/c110731_g1_i4|m.89640/c107738_g1_i1|m.67664/c107738_g1_i4|m.67668/c110257_g2_i5|m.85658/c110257_g2_i11|m.85666/c111090_g1_i1|m.92876/c106561_g1_i1|m.60221/c110876_g2_i4|m.91004/c109369_g2_i1|m.78832/c109141_g4_i2|m.77327/c1081…	40
GO:1990578	perinuclear endoplasmic reticulum membrane	32/3804	73/43701	1.48059e-15	1.39598e-13	1.24152e-13	c111169_g3_i1|m.93563/c108685_g4_i1|m.74187/c109866_g2_i1|m.82528/c106804_g1_i1|m.61714/c106804_g2_i1|m.61715/c164198_g1_i1|m.101020/c104117_g1_i1|m.47932/c104117_g7_i1|m.47941/c98178_g1_i1|m.28873/c104117_g7_i2|m.47942/c100939_g1_i1|m.36239/c100939_g1_i2|m.36240/c106489_g1_i2|m.59785/c102984_g1_i1|m.43076/c110390_g4_i5|m.86604/c116458_g1_i1|m.96179/c61851_g2_i1|m.6188/c109183_g4_i3|m.77656/c1091…	32
GO:0010305	leaf vascular tissue pattern formation	87/3804	404/43701	2.08998e-15	1.93598e-13	1.72177e-13	c108091_g6_i1|m.70087/c137764_g1_i1|m.98370/c106654_g9_i1|m.60803/c87097_g3_i1|m.15139/c153008_g1_i1|m.99896/c104973_g9_i1|m.51829/c108091_g2_i1|m.70079/c182109_g1_i1|m.102801/c162128_g1_i1|m.100695/c106654_g4_i1|m.60793/c106556_g3_i1|m.60196/c110732_g1_i2|m.89648/c108091_g9_i1|m.70090/c110588_g8_i1|m.88371/c102936_g15_i1|m.42930/c103696_g7_i2|m.46222/c108987_g2_i2|m.76190/c98004_g2_i1|m.28460/c1…	87
GO:0009593	detection of chemical stimulus	57/3804	208/43701	2.89104e-15	2.63184e-13	2.34064e-13	c111115_g3_i3|m.93122/c111115_g3_i7|m.93141/c109944_g2_i1|m.83146/c98390_g1_i3|m.29359/c107529_g5_i1|m.66186/c123324_g1_i1|m.96984/c73376_g1_i1|m.9813/c29342_g2_i1|m.3268/c109845_g4_i1|m.82374/c108987_g2_i2|m.76190/c98004_g2_i1|m.28460/c98004_g5_i1|m.28465/c142073_g1_i1|m.98782/c98004_g6_i1|m.28466/c85817_g1_i1|m.14140/c98004_g4_i2|m.28464/c13355_g1_i1|m.1308/c105113_g1_i1|m.52608/c160715_g1_i1|m…	57
GO:0045197	establishment or maintenance of epithelial cell apical/basal polarity	41/3804	118/43701	3.11451e-15	2.78722e-13	2.47883e-13	c101230_g2_i3|m.37065/c110875_g1_i3|m.90985/c90107_g1_i1|m.17049/c110926_g2_i2|m.91440/c110926_g2_i1|m.91434/c62392_g1_i1|m.6368/c109536_g2_i4|m.80076/c110731_g1_i3|m.89639/c110731_g1_i4|m.89640/c107738_g1_i1|m.67664/c107738_g1_i4|m.67668/c110257_g2_i5|m.85658/c110257_g2_i11|m.85666/c111090_g1_i1|m.92876/c106561_g1_i1|m.60221/c110876_g2_i4|m.91004/c109369_g2_i1|m.78832/c109141_g4_i2|m.77327/c1081…	41
GO:0001704	formation of primary germ layer	57/3804	210/43701	4.57595e-15	4.02683e-13	3.58128e-13	c110257_g2_i5|m.85658/c110257_g2_i11|m.85666/c98318_g1_i1|m.29161/c100573_g3_i1|m.35195/c109924_g1_i3|m.82988/c101515_g1_i1|m.37973/c109845_g4_i1|m.82374/c109845_g2_i1|m.82369/c108987_g2_i3|m.76192/c109696_g6_i2|m.81216/c105531_g6_i1|m.54792/c107529_g1_i1|m.66178/c105531_g5_i1|m.54791/c104298_g1_i1|m.48778/c11504_g1_i1|m.1019/c109916_g2_i4|m.82929/c109916_g2_i2|m.82923/c109916_g2_i3|m.82928/c1099…	57
GO:0035088	establishment or maintenance of apical/basal cell polarity	41/3804	122/43701	1.15821e-14	1.00251e-12	8.9159e-13	c101230_g2_i3|m.37065/c110875_g1_i3|m.90985/c90107_g1_i1|m.17049/c110926_g2_i2|m.91440/c110926_g2_i1|m.91434/c62392_g1_i1|m.6368/c109536_g2_i4|m.80076/c110731_g1_i3|m.89639/c110731_g1_i4|m.89640/c107738_g1_i1|m.67664/c107738_g1_i4|m.67668/c110257_g2_i5|m.85658/c110257_g2_i11|m.85666/c111090_g1_i1|m.92876/c106561_g1_i1|m.60221/c110876_g2_i4|m.91004/c109369_g2_i1|m.78832/c109141_g4_i2|m.77327/c1081…	41
GO:0009756	carbohydrate mediated signaling	96/3804	483/43701	1.56153e-14	1.30871e-12	1.16391e-12	c87097_g3_i1|m.15139/c152860_g1_i1|m.99880/c77626_g1_i1|m.10853/c88481_g2_i1|m.15791/c104228_g2_i2|m.48442/c162128_g1_i1|m.100695/c106654_g4_i1|m.60793/c86995_g2_i2|m.15075/c96688_g3_i1|m.25461/c89045_g1_i1|m.16089/c102936_g15_i1|m.42930/c103696_g7_i1|m.46220/c103696_g7_i2|m.46222/c111348_g2_i3|m.94959/c107779_g9_i1|m.67915/c109255_g13_i1|m.78119/c103696_g8_i1|m.46221/c149444_g1_i1|m.99480/c95148…	96
GO:0010182	sugar mediated signaling pathway	96/3804	483/43701	1.56153e-14	1.30871e-12	1.16391e-12	c87097_g3_i1|m.15139/c152860_g1_i1|m.99880/c77626_g1_i1|m.10853/c88481_g2_i1|m.15791/c104228_g2_i2|m.48442/c162128_g1_i1|m.100695/c106654_g4_i1|m.60793/c86995_g2_i2|m.15075/c96688_g3_i1|m.25461/c89045_g1_i1|m.16089/c102936_g15_i1|m.42930/c103696_g7_i1|m.46220/c103696_g7_i2|m.46222/c111348_g2_i3|m.94959/c107779_g9_i1|m.67915/c109255_g13_i1|m.78119/c103696_g8_i1|m.46221/c149444_g1_i1|m.99480/c95148…	96
GO:0030507	spectrin binding	39/3804	113/43701	1.88038e-14	1.55132e-12	1.37967e-12	c101230_g2_i3|m.37065/c111115_g3_i3|m.93122/c111115_g3_i7|m.93141/c104484_g2_i8|m.49566/c104484_g2_i6|m.49556/c104914_g5_i2|m.51528/c110875_g1_i3|m.90985/c124789_g1_i1|m.97139/c90107_g1_i1|m.17049/c101230_g3_i2|m.37056/c110408_g2_i1|m.86753/c109550_g1_i7|m.80269/c109691_g1_i1|m.81172/c101007_g1_i1|m.36407/c108589_g1_i1|m.73594/c110926_g1_i1|m.91432/c105922_g2_i1|m.56787/c110926_g1_i6|m.91441/c110…	39
GO:0052542	defense response by callose deposition	73/3804	326/43701	4.58071e-14	3.72095e-12	3.30924e-12	c105120_g2_i1|m.52641/c107987_g4_i1|m.69426/c106293_g4_i2|m.58763/c105120_g3_i1|m.52643/c111240_g1_i5|m.94161/c103197_g4_i1|m.43950/c105881_g10_i1|m.56566/c105881_g8_i1|m.56561/c106764_g1_i6|m.61458/c106346_g1_i2|m.59052/c110002_g1_i1|m.83590/c109777_g9_i2|m.81848/c110783_g4_i1|m.90165/c109777_g7_i1|m.81845/c96394_g7_i1|m.24975/c100573_g2_i1|m.35194/c139116_g1_i1|m.98515/c29342_g2_i1|m.3268/c1005…	73
GO:0007492	endoderm development	54/3804	204/43701	7.31528e-14	5.85222e-12	5.2047e-12	c110257_g2_i5|m.85658/c110257_g2_i11|m.85666/c98318_g1_i1|m.29161/c100573_g3_i1|m.35195/c109924_g1_i3|m.82988/c101515_g1_i1|m.37973/c109845_g4_i1|m.82374/c109845_g2_i1|m.82369/c108987_g2_i3|m.76192/c109696_g6_i2|m.81216/c105531_g6_i1|m.54792/c107529_g1_i1|m.66178/c105531_g5_i1|m.54791/c104298_g1_i1|m.48778/c11504_g1_i1|m.1019/c109916_g2_i4|m.82929/c109916_g2_i2|m.82923/c109916_g2_i3|m.82928/c1099…	54
GO:0009403	toxin biosynthetic process	44/3804	147/43701	1.37444e-13	1.08314e-11	9.63294e-12	c103825_g1_i1|m.46711/c77916_g1_i1|m.10959/c78819_g3_i1|m.11237/c102046_g1_i1|m.39705/c103790_g1_i1|m.46606/c93405_g1_i1|m.20222/c93324_g1_i1|m.20136/c108175_g4_i1|m.70621/c29263_g1_i1|m.3235/c148853_g1_i1|m.99390/c39930_g1_i1|m.4222/c175676_g1_i1|m.102054/c65162_g1_i1|m.7023/c105245_g12_i1|m.53306/c107464_g5_i1|m.65802/c75972_g1_i1|m.10328/c107464_g7_i1|m.65807/c107464_g2_i1|m.65801/c109563_g2_i…	44
GO:0032103	positive regulation of response to external stimulus	75/3804	349/43701	1.94389e-13	1.50937e-11	1.34236e-11	c107470_g3_i6|m.65857/c84898_g1_i1|m.13616/c110731_g2_i1|m.89636/c110206_g2_i2|m.85226/c109768_g6_i1|m.81775/c111238_g2_i3|m.94135/c15214_g1_i1|m.1560/c108685_g3_i1|m.74186/c111169_g3_i1|m.93563/c108685_g4_i2|m.74190/c108685_g4_i1|m.74187/c110378_g4_i1|m.86543/c108685_g5_i2|m.74192/c109866_g2_i1|m.82528/c106023_g1_i1|m.57225/c106352_g2_i1|m.59097/c106804_g3_i1|m.61716/c106804_g1_i1|m.61714/c10680…	75
GO:0061245	establishment or maintenance of bipolar cell polarity	41/3804	132/43701	2.34272e-13	1.79269e-11	1.59433e-11	c101230_g2_i3|m.37065/c110875_g1_i3|m.90985/c90107_g1_i1|m.17049/c110926_g2_i2|m.91440/c110926_g2_i1|m.91434/c62392_g1_i1|m.6368/c109536_g2_i4|m.80076/c110731_g1_i3|m.89639/c110731_g1_i4|m.89640/c107738_g1_i1|m.67664/c107738_g1_i4|m.67668/c110257_g2_i5|m.85658/c110257_g2_i11|m.85666/c111090_g1_i1|m.92876/c106561_g1_i1|m.60221/c110876_g2_i4|m.91004/c109369_g2_i1|m.78832/c109141_g4_i2|m.77327/c1081…	41
GO:0030017	sarcomere	55/3804	217/43701	3.02406e-13	2.28101e-11	2.02862e-11	c101230_g2_i3|m.37065/c104914_g5_i2|m.51528/c110875_g1_i3|m.90985/c90107_g1_i1|m.17049/c101230_g3_i2|m.37056/c110408_g2_i1|m.86753/c109550_g1_i7|m.80269/c109550_g2_i1|m.80257/c101007_g1_i1|m.36407/c108589_g1_i1|m.73594/c110926_g1_i1|m.91432/c105922_g2_i1|m.56787/c110926_g1_i6|m.91441/c110926_g1_i4|m.91437/c105922_g1_i1|m.56783/c107470_g3_i2|m.65850/c105922_g3_i1|m.56788/c110926_g2_i2|m.91440/c110…	55
GO:0097038	perinuclear endoplasmic reticulum	33/3804	91/43701	3.77496e-13	2.80729e-11	2.49668e-11	c111169_g3_i1|m.93563/c108685_g4_i1|m.74187/c109866_g2_i1|m.82528/c106804_g1_i1|m.61714/c106804_g2_i1|m.61715/c164198_g1_i1|m.101020/c104117_g1_i1|m.47932/c104117_g7_i1|m.47941/c98178_g1_i1|m.28873/c104117_g7_i2|m.47942/c100939_g1_i1|m.36239/c100939_g1_i2|m.36240/c106489_g1_i2|m.59785/c102984_g1_i1|m.43076/c110390_g4_i5|m.86604/c116458_g1_i1|m.96179/c61851_g2_i1|m.6188/c109183_g4_i3|m.77656/c1091…	33
GO:0009152	purine ribonucleotide biosynthetic process	88/3804	452/43701	6.40991e-13	4.7006e-11	4.1805e-11	c110514_g1_i2|m.87701/c110514_g5_i2|m.87705/c98019_g5_i2|m.28500/c110514_g5_i1|m.87703/c163025_g1_i1|m.100862/c87045_g1_i1|m.15110/c119694_g1_i1|m.96320/c108266_g8_i1|m.71200/c109220_g2_i7|m.77867/c108266_g7_i1|m.71197/c109220_g2_i3|m.77858/c109220_g2_i1|m.77851/c110151_g2_i1|m.84787/c111074_g3_i1|m.92622/c111074_g3_i3|m.92635/c110151_g2_i5|m.84795/c111074_g3_i4|m.92646/c108263_g5_i1|m.71167/c108…	88
GO:0031594	neuromuscular junction	37/3804	114/43701	7.54211e-13	5.45511e-11	4.85153e-11	c104914_g5_i2|m.51528/c110875_g1_i3|m.90985/c90107_g1_i1|m.17049/c101230_g3_i2|m.37056/c110408_g2_i1|m.86753/c101007_g1_i1|m.36407/c108589_g1_i1|m.73594/c110926_g1_i1|m.91432/c105922_g2_i1|m.56787/c110926_g1_i4|m.91437/c107470_g3_i2|m.65850/c105922_g3_i1|m.56788/c110926_g2_i2|m.91440/c110926_g2_i1|m.91434/c62392_g1_i1|m.6368/c110957_g10_i2|m.91664/c109536_g2_i4|m.80076/c111005_g1_i6|m.92127/c1107…	37
GO:0044449	contractile fiber part	55/3804	222/43701	8.21299e-13	5.86008e-11	5.21168e-11	c101230_g2_i3|m.37065/c104914_g5_i2|m.51528/c110875_g1_i3|m.90985/c90107_g1_i1|m.17049/c101230_g3_i2|m.37056/c110408_g2_i1|m.86753/c109550_g1_i7|m.80269/c109550_g2_i1|m.80257/c101007_g1_i1|m.36407/c108589_g1_i1|m.73594/c110926_g1_i1|m.91432/c105922_g2_i1|m.56787/c110926_g1_i6|m.91441/c110926_g1_i4|m.91437/c105922_g1_i1|m.56783/c107470_g3_i2|m.65850/c105922_g3_i1|m.56788/c110926_g2_i2|m.91440/c110…	55
GO:0014731	spectrin-associated cytoskeleton	28/3804	69/43701	8.89467e-13	6.20059e-11	5.51452e-11	c101230_g2_i3|m.37065/c104914_g5_i2|m.51528/c110875_g1_i3|m.90985/c90107_g1_i1|m.17049/c101230_g3_i2|m.37056/c110408_g2_i1|m.86753/c101007_g1_i1|m.36407/c108589_g1_i1|m.73594/c110926_g1_i1|m.91432/c105922_g2_i1|m.56787/c110926_g1_i4|m.91437/c107470_g3_i2|m.65850/c107470_g3_i6|m.65857/c105922_g3_i1|m.56788/c110926_g2_i2|m.91440/c110926_g2_i1|m.91434/c62392_g1_i1|m.6368/c110957_g10_i2|m.91664/c1110…	28
GO:0080043	quercetin 3-O-glucosyltransferase activity	66/3804	296/43701	9.04252e-13	6.20059e-11	5.51452e-11	c102313_g1_i1|m.40704/c102313_g1_i2|m.40706/c110635_g1_i1|m.88813/c108342_g2_i2|m.71806/c90929_g1_i1|m.17855/c102440_g3_i3|m.41192/c102440_g3_i2|m.41191/c108342_g1_i2|m.71810/c109900_g1_i1|m.82789/c105756_g1_i1|m.55878/c105756_g1_i2|m.55880/c105756_g1_i3|m.55881/c24214_g1_i1|m.2588/c105756_g1_i4|m.55882/c105756_g2_i1|m.55884/c104537_g1_i2|m.49789/c104843_g2_i1|m.51191/c104843_g3_i1|m.51196/c77782…	66
GO:0080044	quercetin 7-O-glucosyltransferase activity	66/3804	296/43701	9.04252e-13	6.20059e-11	5.51452e-11	c102313_g1_i1|m.40704/c102313_g1_i2|m.40706/c110635_g1_i1|m.88813/c108342_g2_i2|m.71806/c90929_g1_i1|m.17855/c102440_g3_i3|m.41192/c102440_g3_i2|m.41191/c108342_g1_i2|m.71810/c109900_g1_i1|m.82789/c105756_g1_i1|m.55878/c105756_g1_i2|m.55880/c105756_g1_i3|m.55881/c24214_g1_i1|m.2588/c105756_g1_i4|m.55882/c105756_g2_i1|m.55884/c104537_g1_i2|m.49789/c104843_g2_i1|m.51191/c104843_g3_i1|m.51196/c77782…	66
GO:0033037	polysaccharide localization	74/3804	353/43701	1.02813e-12	6.95965e-11	6.18959e-11	c105120_g2_i1|m.52641/c107987_g4_i1|m.69426/c106293_g4_i2|m.58763/c105120_g3_i1|m.52643/c111240_g1_i5|m.94161/c103197_g4_i1|m.43950/c105881_g10_i1|m.56566/c105881_g8_i1|m.56561/c106764_g1_i6|m.61458/c106346_g1_i2|m.59052/c110002_g1_i1|m.83590/c109777_g9_i2|m.81848/c110783_g4_i1|m.90165/c109777_g7_i1|m.81845/c96394_g7_i1|m.24975/c100573_g2_i1|m.35194/c139116_g1_i1|m.98515/c29342_g2_i1|m.3268/c1005…	74
GO:0007369	gastrulation	64/3804	284/43701	1.2033e-12	8.02815e-11	7.13987e-11	c103773_g1_i2|m.46529/c106908_g2_i4|m.62392/c110755_g1_i3|m.89895/c110257_g2_i5|m.85658/c110257_g2_i11|m.85666/c98318_g1_i1|m.29161/c100573_g3_i1|m.35195/c109924_g1_i3|m.82988/c101515_g1_i1|m.37973/c109845_g4_i1|m.82374/c109845_g2_i1|m.82369/c108987_g2_i3|m.76192/c109696_g6_i2|m.81216/c105531_g6_i1|m.54792/c107529_g1_i1|m.66178/c105531_g5_i1|m.54791/c104298_g1_i1|m.48778/c11504_g1_i1|m.1019/c1099…	64
GO:0052545	callose localization	73/3804	347/43701	1.21639e-12	8.02815e-11	7.13987e-11	c105120_g2_i1|m.52641/c107987_g4_i1|m.69426/c106293_g4_i2|m.58763/c105120_g3_i1|m.52643/c111240_g1_i5|m.94161/c103197_g4_i1|m.43950/c105881_g10_i1|m.56566/c105881_g8_i1|m.56561/c106764_g1_i6|m.61458/c106346_g1_i2|m.59052/c110002_g1_i1|m.83590/c109777_g9_i2|m.81848/c110783_g4_i1|m.90165/c109777_g7_i1|m.81845/c96394_g7_i1|m.24975/c100573_g2_i1|m.35194/c139116_g1_i1|m.98515/c29342_g2_i1|m.3268/c1005…	73
GO:2001257	regulation of cation channel activity	31/3804	85/43701	1.6199e-12	1.05594e-10	9.39101e-11	c101230_g2_i3|m.37065/c104914_g5_i2|m.51528/c110875_g1_i3|m.90985/c90107_g1_i1|m.17049/c101230_g3_i2|m.37056/c110408_g2_i1|m.86753/c109550_g1_i7|m.80269/c101007_g1_i1|m.36407/c108589_g1_i1|m.73594/c110926_g1_i1|m.91432/c105922_g2_i1|m.56787/c110926_g1_i6|m.91441/c110926_g1_i4|m.91437/c107470_g3_i2|m.65850/c105922_g3_i1|m.56788/c110926_g2_i2|m.91440/c110926_g2_i1|m.91434/c62392_g1_i1|m.6368/c11095…	31
GO:0046718	viral entry into host cell	29/3804	76/43701	2.23475e-12	1.43896e-10	1.27975e-10	c106627_g5_i1|m.60652/c93238_g3_i1|m.20049/c181763_g1_i1|m.102764/c80585_g3_i1|m.11680/c91708_g2_i1|m.18593/c110234_g7_i1|m.85469/c137846_g1_i1|m.98382/c90961_g1_i2|m.17881/c106981_g2_i2|m.62738/c51404_g1_i1|m.5408/c110988_g1_i1|m.91949/c77377_g1_i1|m.10750/c59126_g1_i1|m.5767/c100255_g3_i1|m.34346/c120581_g1_i1|m.96525/c97949_g1_i2|m.28359/c110914_g4_i2|m.91336/c96109_g1_i1|m.24532/c99963_g5_i1|…	29
GO:2001258	negative regulation of cation channel activity	23/3804	49/43701	2.38645e-12	1.51813e-10	1.35015e-10	c104914_g5_i2|m.51528/c110875_g1_i3|m.90985/c90107_g1_i1|m.17049/c101230_g3_i2|m.37056/c110408_g2_i1|m.86753/c101007_g1_i1|m.36407/c108589_g1_i1|m.73594/c110926_g1_i1|m.91432/c105922_g2_i1|m.56787/c110926_g1_i4|m.91437/c107470_g3_i2|m.65850/c105922_g3_i1|m.56788/c110926_g2_i2|m.91440/c110926_g2_i1|m.91434/c62392_g1_i1|m.6368/c110957_g10_i2|m.91664/c111005_g1_i6|m.92127/c110731_g1_i6|m.89644/c7470…	23
GO:1903817	negative regulation of voltage-gated potassium channel activity	22/3804	45/43701	2.52877e-12	1.58951e-10	1.41364e-10	c104914_g5_i2|m.51528/c110875_g1_i3|m.90985/c90107_g1_i1|m.17049/c101230_g3_i2|m.37056/c110408_g2_i1|m.86753/c101007_g1_i1|m.36407/c108589_g1_i1|m.73594/c110926_g1_i1|m.91432/c105922_g2_i1|m.56787/c110926_g1_i4|m.91437/c107470_g3_i2|m.65850/c105922_g3_i1|m.56788/c110926_g2_i2|m.91440/c110926_g2_i1|m.91434/c62392_g1_i1|m.6368/c110957_g10_i2|m.91664/c111005_g1_i6|m.92127/c110731_g1_i6|m.89644/c7470…	22
GO:0030016	myofibril	55/3804	228/43701	2.59507e-12	1.612e-10	1.43364e-10	c101230_g2_i3|m.37065/c104914_g5_i2|m.51528/c110875_g1_i3|m.90985/c90107_g1_i1|m.17049/c101230_g3_i2|m.37056/c110408_g2_i1|m.86753/c109550_g1_i7|m.80269/c109550_g2_i1|m.80257/c101007_g1_i1|m.36407/c108589_g1_i1|m.73594/c110926_g1_i1|m.91432/c105922_g2_i1|m.56787/c110926_g1_i6|m.91441/c110926_g1_i4|m.91437/c105922_g1_i1|m.56783/c107470_g3_i2|m.65850/c105922_g3_i1|m.56788/c110926_g2_i2|m.91440/c110…	55
GO:0072661	protein targeting to plasma membrane	40/3804	136/43701	3.22282e-12	1.97866e-10	1.75973e-10	c101230_g2_i3|m.37065/c111115_g3_i3|m.93122/c111115_g3_i7|m.93141/c104484_g2_i8|m.49566/c104484_g2_i6|m.49556/c104914_g5_i2|m.51528/c110875_g1_i3|m.90985/c124789_g1_i1|m.97139/c90107_g1_i1|m.17049/c101230_g3_i2|m.37056/c110408_g2_i1|m.86753/c109550_g1_i7|m.80269/c109691_g1_i1|m.81172/c101007_g1_i1|m.36407/c108589_g1_i1|m.73594/c110926_g1_i1|m.91432/c105922_g2_i1|m.56787/c110926_g1_i6|m.91441/c110…	40
GO:1900424	regulation of defense response to bacterium	72/3804	349/43701	4.609e-12	2.79481e-10	2.48557e-10	c107470_g3_i6|m.65857/c84898_g1_i1|m.13616/c110731_g2_i1|m.89636/c108870_g2_i1|m.75435/c108685_g3_i1|m.74186/c111169_g3_i1|m.93563/c108685_g4_i2|m.74190/c108685_g4_i1|m.74187/c110378_g4_i1|m.86543/c108685_g5_i2|m.74192/c109866_g2_i1|m.82528/c106023_g1_i1|m.57225/c106352_g2_i1|m.59097/c106804_g3_i1|m.61716/c106804_g1_i1|m.61714/c106804_g2_i1|m.61715/c164198_g1_i1|m.101020/c108175_g4_i1|m.70621/c10…	72
GO:0006164	purine nucleotide biosynthetic process	88/3804	468/43701	4.65801e-12	2.79481e-10	2.48557e-10	c110514_g1_i2|m.87701/c110514_g5_i2|m.87705/c98019_g5_i2|m.28500/c110514_g5_i1|m.87703/c163025_g1_i1|m.100862/c87045_g1_i1|m.15110/c119694_g1_i1|m.96320/c108266_g8_i1|m.71200/c109220_g2_i7|m.77867/c108266_g7_i1|m.71197/c109220_g2_i3|m.77858/c109220_g2_i1|m.77851/c110151_g2_i1|m.84787/c111074_g3_i1|m.92622/c111074_g3_i3|m.92635/c110151_g2_i5|m.84795/c111074_g3_i4|m.92646/c108263_g5_i1|m.71167/c108…	88
GO:0048281	inflorescence morphogenesis	26/3804	64/43701	5.57932e-12	3.30998e-10	2.94374e-10	c123324_g1_i1|m.96984/c73376_g1_i1|m.9813/c98004_g2_i1|m.28460/c105531_g4_i1|m.54790/c100431_g1_i1|m.34834/c109916_g1_i5|m.82933/c109916_g1_i4|m.82931/c109916_g1_i1|m.82919/c107529_g2_i1|m.66180/c111243_g2_i1|m.94168/c111243_g2_i2|m.94170/c81641_g1_i1|m.11915/c89991_g1_i1|m.16952/c95692_g2_i1|m.23817/c104139_g3_i1|m.48038/c104139_g3_i2|m.48039/c105177_g1_i5|m.52954/c111379_g3_i1|m.95225/c107775_g…	26
GO:0010644	cell communication by electrical coupling	22/3804	47/43701	7.6705e-12	4.45057e-10	3.95814e-10	c104914_g5_i2|m.51528/c110875_g1_i3|m.90985/c90107_g1_i1|m.17049/c101230_g3_i2|m.37056/c110408_g2_i1|m.86753/c101007_g1_i1|m.36407/c108589_g1_i1|m.73594/c110926_g1_i1|m.91432/c105922_g2_i1|m.56787/c110926_g1_i4|m.91437/c107470_g3_i2|m.65850/c105922_g3_i1|m.56788/c110926_g2_i2|m.91440/c110926_g2_i1|m.91434/c62392_g1_i1|m.6368/c110957_g10_i2|m.91664/c111005_g1_i6|m.92127/c110731_g1_i6|m.89644/c7470…	22
GO:0043194	axon initial segment	22/3804	47/43701	7.6705e-12	4.45057e-10	3.95814e-10	c104914_g5_i2|m.51528/c110875_g1_i3|m.90985/c90107_g1_i1|m.17049/c101230_g3_i2|m.37056/c110408_g2_i1|m.86753/c101007_g1_i1|m.36407/c108589_g1_i1|m.73594/c110926_g1_i1|m.91432/c105922_g2_i1|m.56787/c110926_g1_i4|m.91437/c107470_g3_i2|m.65850/c105922_g3_i1|m.56788/c110926_g2_i2|m.91440/c110926_g2_i1|m.91434/c62392_g1_i1|m.6368/c110957_g10_i2|m.91664/c111005_g1_i6|m.92127/c110731_g1_i6|m.89644/c1085…	22
GO:0019012	virion	26/3804	65/43701	8.52777e-12	4.8942e-10	4.35268e-10	c106627_g5_i1|m.60652/c104026_g1_i1|m.47567/c93238_g3_i1|m.20049/c80585_g3_i1|m.11680/c91708_g2_i1|m.18593/c137846_g1_i1|m.98382/c90961_g1_i2|m.17881/c108152_g10_i1|m.70467/c110988_g1_i1|m.91949/c77377_g1_i1|m.10750/c59126_g1_i1|m.5767/c120581_g1_i1|m.96525/c72399_g1_i1|m.9555/c111357_g1_i2|m.95042/c134633_g1_i1|m.97840/c97949_g1_i2|m.28359/c110914_g4_i2|m.91336/c96109_g1_i1|m.24532/c99963_g5_i1|…	26
GO:0004520	endodeoxyribonuclease activity	78/3804	398/43701	9.10302e-12	5.16817e-10	4.59633e-10	c101363_g2_i1|m.37518/c110076_g4_i1|m.84197/c73204_g1_i1|m.9762/c105148_g2_i1|m.52811/c109330_g3_i1|m.78544/c89791_g1_i1|m.16793/c64792_g1_i1|m.6975/c148582_g1_i1|m.99336/c27446_g1_i1|m.2908/c110358_g6_i1|m.86394/c107139_g4_i1|m.63644/c99688_g1_i1|m.32606/c90086_g1_i1|m.17037/c99286_g3_i1|m.31744/c107139_g4_i1|m.63645/c147635_g1_i1|m.99105/c88443_g2_i1|m.15781/c64486_g1_i1|m.6913/c72463_g1_i1|m.9…	78
GO:0043292	contractile fiber	55/3804	235/43701	9.32817e-12	5.23965e-10	4.6599e-10	c101230_g2_i3|m.37065/c104914_g5_i2|m.51528/c110875_g1_i3|m.90985/c90107_g1_i1|m.17049/c101230_g3_i2|m.37056/c110408_g2_i1|m.86753/c109550_g1_i7|m.80269/c109550_g2_i1|m.80257/c101007_g1_i1|m.36407/c108589_g1_i1|m.73594/c110926_g1_i1|m.91432/c105922_g2_i1|m.56787/c110926_g1_i6|m.91441/c110926_g1_i4|m.91437/c105922_g1_i1|m.56783/c107470_g3_i2|m.65850/c105922_g3_i1|m.56788/c110926_g2_i2|m.91440/c110…	55
GO:0032541	cortical endoplasmic reticulum	32/3804	96/43701	1.16751e-11	6.48892e-10	5.77095e-10	c111169_g3_i1|m.93563/c108685_g4_i1|m.74187/c109866_g2_i1|m.82528/c106804_g1_i1|m.61714/c106804_g2_i1|m.61715/c164198_g1_i1|m.101020/c104117_g1_i1|m.47932/c104117_g7_i1|m.47941/c98178_g1_i1|m.28873/c104117_g7_i2|m.47942/c100939_g1_i1|m.36239/c100939_g1_i2|m.36240/c106489_g1_i2|m.59785/c102984_g1_i1|m.43076/c110390_g4_i5|m.86604/c116458_g1_i1|m.96179/c61851_g2_i1|m.6188/c109183_g4_i3|m.77656/c1091…	32
GO:0009404	toxin metabolic process	51/3804	210/43701	1.21546e-11	6.68505e-10	5.94538e-10	c103825_g1_i1|m.46711/c77916_g1_i1|m.10959/c78819_g3_i1|m.11237/c102046_g1_i1|m.39705/c103790_g1_i1|m.46606/c93405_g1_i1|m.20222/c93324_g1_i1|m.20136/c108175_g4_i1|m.70621/c29263_g1_i1|m.3235/c148853_g1_i1|m.99390/c39930_g1_i1|m.4222/c175676_g1_i1|m.102054/c65162_g1_i1|m.7023/c105245_g12_i1|m.53306/c107464_g5_i1|m.65802/c75972_g1_i1|m.10328/c107464_g7_i1|m.65807/c107464_g2_i1|m.65801/c109563_g2_i…	51
GO:1902260	negative regulation of delayed rectifier potassium channel activity	21/3804	44/43701	1.43343e-11	7.80257e-10	6.93925e-10	c104914_g5_i2|m.51528/c110875_g1_i3|m.90985/c90107_g1_i1|m.17049/c101230_g3_i2|m.37056/c110408_g2_i1|m.86753/c101007_g1_i1|m.36407/c108589_g1_i1|m.73594/c110926_g1_i1|m.91432/c105922_g2_i1|m.56787/c110926_g1_i4|m.91437/c107470_g3_i2|m.65850/c105922_g3_i1|m.56788/c110926_g2_i2|m.91440/c110926_g2_i1|m.91434/c62392_g1_i1|m.6368/c110957_g10_i2|m.91664/c111005_g1_i6|m.92127/c110731_g1_i6|m.89644/c7470…	21
GO:0052482	defense response by cell wall thickening	53/3804	226/43701	2.03133e-11	1.08338e-09	9.63506e-10	c100573_g2_i1|m.35194/c139116_g1_i1|m.98515/c29342_g2_i1|m.3268/c100573_g3_i1|m.35195/c109924_g1_i3|m.82988/c101515_g1_i1|m.37973/c109845_g3_i1|m.82373/c110732_g1_i2|m.89648/c109845_g2_i1|m.82369/c111086_g3_i1|m.92774/c108987_g2_i3|m.76192/c98004_g6_i1|m.28466/c13355_g1_i1|m.1308/c111243_g2_i1|m.94167/c100431_g1_i1|m.34834/c95692_g3_i1|m.23818/c106352_g4_i1|m.59099/c104117_g1_i1|m.47932/c111090_g…	53
GO:0052544	defense response by callose deposition in cell wall	53/3804	226/43701	2.03133e-11	1.08338e-09	9.63506e-10	c100573_g2_i1|m.35194/c139116_g1_i1|m.98515/c29342_g2_i1|m.3268/c100573_g3_i1|m.35195/c109924_g1_i3|m.82988/c101515_g1_i1|m.37973/c109845_g3_i1|m.82373/c110732_g1_i2|m.89648/c109845_g2_i1|m.82369/c111086_g3_i1|m.92774/c108987_g2_i3|m.76192/c98004_g6_i1|m.28466/c13355_g1_i1|m.1308/c111243_g2_i1|m.94167/c100431_g1_i1|m.34834/c95692_g3_i1|m.23818/c106352_g4_i1|m.59099/c104117_g1_i1|m.47932/c111090_g…	53
GO:0016554	cytidine to uridine editing	51/3804	213/43701	2.13288e-11	1.12616e-09	1.00155e-09	c84840_g1_i1|m.13584/c98822_g1_i1|m.30502/c87097_g1_i1|m.15137/c182109_g1_i1|m.102801/c88481_g2_i1|m.15791/c104228_g2_i1|m.48441/c104228_g2_i2|m.48442/c82759_g1_i1|m.12487/c106654_g4_i2|m.60797/c106595_g7_i1|m.60437/c108091_g5_i1|m.70086/c108091_g9_i1|m.70090/c110588_g8_i1|m.88371/c74903_g1_i1|m.10053/c149444_g1_i1|m.99480/c104576_g15_i1|m.49963/c21064_g1_i1|m.2317/c107779_g17_i1|m.67926/c103657_…	51
GO:0045995	regulation of embryonic development	62/3804	289/43701	2.46611e-11	1.28922e-09	1.14657e-09	c110257_g2_i5|m.85658/c110257_g2_i11|m.85666/c98318_g1_i1|m.29161/c100573_g3_i1|m.35195/c109924_g1_i3|m.82988/c101515_g1_i1|m.37973/c109845_g4_i1|m.82374/c109845_g2_i1|m.82369/c108987_g2_i3|m.76192/c109696_g6_i2|m.81216/c105531_g6_i1|m.54792/c107529_g1_i1|m.66178/c105531_g5_i1|m.54791/c104298_g1_i1|m.48778/c11504_g1_i1|m.1019/c109916_g2_i4|m.82929/c109916_g2_i2|m.82923/c109916_g2_i3|m.82928/c1099…	62
GO:0010650	positive regulation of cell communication by electrical coupling	20/3804	41/43701	2.63865e-11	1.32686e-09	1.18005e-09	c104914_g5_i2|m.51528/c110875_g1_i3|m.90985/c90107_g1_i1|m.17049/c101230_g3_i2|m.37056/c110408_g2_i1|m.86753/c101007_g1_i1|m.36407/c108589_g1_i1|m.73594/c110926_g1_i1|m.91432/c105922_g2_i1|m.56787/c110926_g1_i4|m.91437/c107470_g3_i2|m.65850/c105922_g3_i1|m.56788/c110926_g2_i2|m.91440/c110926_g2_i1|m.91434/c62392_g1_i1|m.6368/c110957_g10_i2|m.91664/c111005_g1_i6|m.92127/c110731_g1_i6|m.89644/c7470…	20
GO:0033268	node of Ranvier	20/3804	41/43701	2.63865e-11	1.32686e-09	1.18005e-09	c104914_g5_i2|m.51528/c110875_g1_i3|m.90985/c90107_g1_i1|m.17049/c101230_g3_i2|m.37056/c110408_g2_i1|m.86753/c101007_g1_i1|m.36407/c108589_g1_i1|m.73594/c110926_g1_i1|m.91432/c105922_g2_i1|m.56787/c110926_g1_i4|m.91437/c107470_g3_i2|m.65850/c105922_g3_i1|m.56788/c110926_g2_i2|m.91440/c110926_g2_i1|m.91434/c62392_g1_i1|m.6368/c110957_g10_i2|m.91664/c111005_g1_i6|m.92127/c110731_g1_i6|m.89644/c7470…	20
GO:0045760	positive regulation of action potential	20/3804	41/43701	2.63865e-11	1.32686e-09	1.18005e-09	c104914_g5_i2|m.51528/c110875_g1_i3|m.90985/c90107_g1_i1|m.17049/c101230_g3_i2|m.37056/c110408_g2_i1|m.86753/c101007_g1_i1|m.36407/c108589_g1_i1|m.73594/c110926_g1_i1|m.91432/c105922_g2_i1|m.56787/c110926_g1_i4|m.91437/c107470_g3_i2|m.65850/c105922_g3_i1|m.56788/c110926_g2_i2|m.91440/c110926_g2_i1|m.91434/c62392_g1_i1|m.6368/c110957_g10_i2|m.91664/c111005_g1_i6|m.92127/c110731_g1_i6|m.89644/c7470…	20
GO:1900827	positive regulation of membrane depolarization during cardiac muscle cell action potential	20/3804	41/43701	2.63865e-11	1.32686e-09	1.18005e-09	c104914_g5_i2|m.51528/c110875_g1_i3|m.90985/c90107_g1_i1|m.17049/c101230_g3_i2|m.37056/c110408_g2_i1|m.86753/c101007_g1_i1|m.36407/c108589_g1_i1|m.73594/c110926_g1_i1|m.91432/c105922_g2_i1|m.56787/c110926_g1_i4|m.91437/c107470_g3_i2|m.65850/c105922_g3_i1|m.56788/c110926_g2_i2|m.91440/c110926_g2_i1|m.91434/c62392_g1_i1|m.6368/c110957_g10_i2|m.91664/c111005_g1_i6|m.92127/c110731_g1_i6|m.89644/c7470…	20
GO:0016323	basolateral plasma membrane	58/3804	262/43701	2.85677e-11	1.423e-09	1.26555e-09	c101230_g2_i3|m.37065/c110875_g1_i3|m.90985/c90107_g1_i1|m.17049/c101230_g3_i2|m.37056/c110408_g2_i1|m.86753/c109550_g1_i7|m.80269/c101007_g1_i1|m.36407/c108589_g1_i1|m.73594/c110926_g1_i1|m.91432/c105922_g2_i1|m.56787/c110926_g1_i4|m.91437/c105922_g3_i1|m.56788/c110926_g2_i2|m.91440/c110926_g2_i1|m.91434/c62392_g1_i1|m.6368/c110957_g10_i2|m.91664/c154994_g1_i1|m.100054/c109536_g2_i4|m.80076/c110…	58
GO:1902259	regulation of delayed rectifier potassium channel activity	21/3804	46/43701	4.16465e-11	2.05508e-09	1.82769e-09	c104914_g5_i2|m.51528/c110875_g1_i3|m.90985/c90107_g1_i1|m.17049/c101230_g3_i2|m.37056/c110408_g2_i1|m.86753/c101007_g1_i1|m.36407/c108589_g1_i1|m.73594/c110926_g1_i1|m.91432/c105922_g2_i1|m.56787/c110926_g1_i4|m.91437/c107470_g3_i2|m.65850/c105922_g3_i1|m.56788/c110926_g2_i2|m.91440/c110926_g2_i1|m.91434/c62392_g1_i1|m.6368/c110957_g10_i2|m.91664/c111005_g1_i6|m.92127/c110731_g1_i6|m.89644/c7470…	21
GO:2001259	positive regulation of cation channel activity	26/3804	69/43701	4.22598e-11	2.06603e-09	1.83744e-09	c101230_g2_i3|m.37065/c104914_g5_i2|m.51528/c110875_g1_i3|m.90985/c90107_g1_i1|m.17049/c101230_g3_i2|m.37056/c110408_g2_i1|m.86753/c109550_g1_i7|m.80269/c101007_g1_i1|m.36407/c108589_g1_i1|m.73594/c110926_g1_i1|m.91432/c105922_g2_i1|m.56787/c110926_g1_i6|m.91441/c110926_g1_i4|m.91437/c107470_g3_i2|m.65850/c105922_g3_i1|m.56788/c110926_g2_i2|m.91440/c110926_g2_i1|m.91434/c62392_g1_i1|m.6368/c11095…	26
GO:0043902	positive regulation of multi-organism process	86/3804	472/43701	4.44708e-11	2.13659e-09	1.90019e-09	c107470_g3_i6|m.65857/c84898_g1_i1|m.13616/c154994_g1_i1|m.100054/c106627_g5_i1|m.60652/c110731_g2_i1|m.89636/c110206_g2_i2|m.85226/c109768_g6_i1|m.81775/c111238_g2_i3|m.94135/c15214_g1_i1|m.1560/c108685_g3_i1|m.74186/c111169_g3_i1|m.93563/c108685_g4_i2|m.74190/c108685_g4_i1|m.74187/c110378_g4_i1|m.86543/c108685_g5_i2|m.74192/c109866_g2_i1|m.82528/c106023_g1_i1|m.57225/c184345_g1_i1|m.102895/c106…	86
GO:0002240	response to molecule of oomycetes origin	18/3804	34/43701	4.45124e-11	2.13659e-09	1.90019e-09	c107529_g5_i1|m.66186/c123324_g1_i1|m.96984/c73376_g1_i1|m.9813/c29342_g2_i1|m.3268/c109845_g4_i1|m.82374/c108987_g2_i2|m.76190/c98004_g2_i1|m.28460/c142073_g1_i1|m.98782/c98004_g6_i1|m.28466/c85817_g1_i1|m.14140/c98004_g4_i2|m.28464/c105177_g1_i1|m.52951/c105177_g1_i4|m.52953/c91962_g1_i1|m.18805/c107612_g1_i1|m.66762/c111243_g1_i1|m.94166/c138411_g1_i1|m.98439/c99513_g2_i2|m.32286	18
GO:0009729	detection of brassinosteroid stimulus	23/3804	55/43701	4.55121e-11	2.14144e-09	1.9045e-09	c98004_g5_i1|m.28465/c13355_g1_i1|m.1308/c109916_g2_i6|m.82935/c109916_g2_i2|m.82923/c109916_g2_i3|m.82928/c107529_g3_i1|m.66181/c101109_g1_i1|m.36687/c85263_g1_i1|m.13782/c85263_g2_i1|m.13783/c81641_g1_i1|m.11915/c100939_g1_i2|m.36240/c107187_g1_i2|m.63916/c91962_g1_i1|m.18805/c61851_g2_i1|m.6188/c100573_g1_i1|m.35193/c101701_g1_i1|m.38595/c107529_g6_i1|m.66188/c109845_g1_i2|m.82372/c105531_g7_i…	23
GO:1900825	regulation of membrane depolarization during cardiac muscle cell action potential	20/3804	42/43701	4.62356e-11	2.14144e-09	1.9045e-09	c104914_g5_i2|m.51528/c110875_g1_i3|m.90985/c90107_g1_i1|m.17049/c101230_g3_i2|m.37056/c110408_g2_i1|m.86753/c101007_g1_i1|m.36407/c108589_g1_i1|m.73594/c110926_g1_i1|m.91432/c105922_g2_i1|m.56787/c110926_g1_i4|m.91437/c107470_g3_i2|m.65850/c105922_g3_i1|m.56788/c110926_g2_i2|m.91440/c110926_g2_i1|m.91434/c62392_g1_i1|m.6368/c110957_g10_i2|m.91664/c111005_g1_i6|m.92127/c110731_g1_i6|m.89644/c7470…	20
GO:1902307	positive regulation of sodium ion transmembrane transport	20/3804	42/43701	4.62356e-11	2.14144e-09	1.9045e-09	c104914_g5_i2|m.51528/c110875_g1_i3|m.90985/c90107_g1_i1|m.17049/c101230_g3_i2|m.37056/c110408_g2_i1|m.86753/c101007_g1_i1|m.36407/c108589_g1_i1|m.73594/c110926_g1_i1|m.91432/c105922_g2_i1|m.56787/c110926_g1_i4|m.91437/c107470_g3_i2|m.65850/c105922_g3_i1|m.56788/c110926_g2_i2|m.91440/c110926_g2_i1|m.91434/c62392_g1_i1|m.6368/c110957_g10_i2|m.91664/c111005_g1_i6|m.92127/c110731_g1_i6|m.89644/c7470…	20
GO:2000651	positive regulation of sodium ion transmembrane transporter activity	20/3804	42/43701	4.62356e-11	2.14144e-09	1.9045e-09	c104914_g5_i2|m.51528/c110875_g1_i3|m.90985/c90107_g1_i1|m.17049/c101230_g3_i2|m.37056/c110408_g2_i1|m.86753/c101007_g1_i1|m.36407/c108589_g1_i1|m.73594/c110926_g1_i1|m.91432/c105922_g2_i1|m.56787/c110926_g1_i4|m.91437/c107470_g3_i2|m.65850/c105922_g3_i1|m.56788/c110926_g2_i2|m.91440/c110926_g2_i1|m.91434/c62392_g1_i1|m.6368/c110957_g10_i2|m.91664/c111005_g1_i6|m.92127/c110731_g1_i6|m.89644/c7470…	20
GO:0016553	base conversion or substitution editing	51/3804	219/43701	6.3154e-11	2.89959e-09	2.57876e-09	c84840_g1_i1|m.13584/c98822_g1_i1|m.30502/c87097_g1_i1|m.15137/c182109_g1_i1|m.102801/c88481_g2_i1|m.15791/c104228_g2_i1|m.48441/c104228_g2_i2|m.48442/c82759_g1_i1|m.12487/c106654_g4_i2|m.60797/c106595_g7_i1|m.60437/c108091_g5_i1|m.70086/c108091_g9_i1|m.70090/c110588_g8_i1|m.88371/c74903_g1_i1|m.10053/c149444_g1_i1|m.99480/c104576_g15_i1|m.49963/c21064_g1_i1|m.2317/c107779_g17_i1|m.67926/c103657_…	51
GO:0010765	positive regulation of sodium ion transport	20/3804	43/43701	7.93403e-11	3.52031e-09	3.1308e-09	c104914_g5_i2|m.51528/c110875_g1_i3|m.90985/c90107_g1_i1|m.17049/c101230_g3_i2|m.37056/c110408_g2_i1|m.86753/c101007_g1_i1|m.36407/c108589_g1_i1|m.73594/c110926_g1_i1|m.91432/c105922_g2_i1|m.56787/c110926_g1_i4|m.91437/c107470_g3_i2|m.65850/c105922_g3_i1|m.56788/c110926_g2_i2|m.91440/c110926_g2_i1|m.91434/c62392_g1_i1|m.6368/c110957_g10_i2|m.91664/c111005_g1_i6|m.92127/c110731_g1_i6|m.89644/c7470…	20
GO:0071286	cellular response to magnesium ion	20/3804	43/43701	7.93403e-11	3.52031e-09	3.1308e-09	c104914_g5_i2|m.51528/c110875_g1_i3|m.90985/c90107_g1_i1|m.17049/c101230_g3_i2|m.37056/c110408_g2_i1|m.86753/c101007_g1_i1|m.36407/c108589_g1_i1|m.73594/c110926_g1_i1|m.91432/c105922_g2_i1|m.56787/c110926_g1_i4|m.91437/c107470_g3_i2|m.65850/c105922_g3_i1|m.56788/c110926_g2_i2|m.91440/c110926_g2_i1|m.91434/c62392_g1_i1|m.6368/c110957_g10_i2|m.91664/c111005_g1_i6|m.92127/c110731_g1_i6|m.89644/c7470…	20
GO:0090314	positive regulation of protein targeting to membrane	20/3804	43/43701	7.93403e-11	3.52031e-09	3.1308e-09	c104914_g5_i2|m.51528/c110875_g1_i3|m.90985/c90107_g1_i1|m.17049/c101230_g3_i2|m.37056/c110408_g2_i1|m.86753/c101007_g1_i1|m.36407/c108589_g1_i1|m.73594/c110926_g1_i1|m.91432/c105922_g2_i1|m.56787/c110926_g1_i4|m.91437/c107470_g3_i2|m.65850/c105922_g3_i1|m.56788/c110926_g2_i2|m.91440/c110926_g2_i1|m.91434/c62392_g1_i1|m.6368/c110957_g10_i2|m.91664/c111005_g1_i6|m.92127/c110731_g1_i6|m.89644/c7470…	20
GO:0098902	regulation of membrane depolarization during action potential	20/3804	43/43701	7.93403e-11	3.52031e-09	3.1308e-09	c104914_g5_i2|m.51528/c110875_g1_i3|m.90985/c90107_g1_i1|m.17049/c101230_g3_i2|m.37056/c110408_g2_i1|m.86753/c101007_g1_i1|m.36407/c108589_g1_i1|m.73594/c110926_g1_i1|m.91432/c105922_g2_i1|m.56787/c110926_g1_i4|m.91437/c107470_g3_i2|m.65850/c105922_g3_i1|m.56788/c110926_g2_i2|m.91440/c110926_g2_i1|m.91434/c62392_g1_i1|m.6368/c110957_g10_i2|m.91664/c111005_g1_i6|m.92127/c110731_g1_i6|m.89644/c7470…	20
GO:0098900	regulation of action potential	26/3804	71/43701	8.92257e-11	3.92593e-09	3.49154e-09	c101230_g2_i3|m.37065/c104914_g5_i2|m.51528/c110875_g1_i3|m.90985/c90107_g1_i1|m.17049/c101230_g3_i2|m.37056/c110408_g2_i1|m.86753/c109550_g1_i7|m.80269/c101007_g1_i1|m.36407/c108589_g1_i1|m.73594/c110926_g1_i1|m.91432/c105922_g2_i1|m.56787/c110926_g1_i6|m.91441/c110926_g1_i4|m.91437/c107470_g3_i2|m.65850/c105922_g3_i1|m.56788/c110926_g2_i2|m.91440/c110926_g2_i1|m.91434/c62392_g1_i1|m.6368/c11095…	26
GO:0072522	purine-containing compound biosynthetic process	88/3804	495/43701	9.98735e-11	4.35812e-09	3.87591e-09	c110514_g1_i2|m.87701/c110514_g5_i2|m.87705/c98019_g5_i2|m.28500/c110514_g5_i1|m.87703/c163025_g1_i1|m.100862/c87045_g1_i1|m.15110/c119694_g1_i1|m.96320/c108266_g8_i1|m.71200/c109220_g2_i7|m.77867/c108266_g7_i1|m.71197/c109220_g2_i3|m.77858/c109220_g2_i1|m.77851/c110151_g2_i1|m.84787/c111074_g3_i1|m.92622/c111074_g3_i3|m.92635/c110151_g2_i5|m.84795/c111074_g3_i4|m.92646/c108263_g5_i1|m.71167/c108…	88
GO:0052386	cell wall thickening	53/3804	236/43701	1.13765e-10	4.88356e-09	4.34321e-09	c100573_g2_i1|m.35194/c139116_g1_i1|m.98515/c29342_g2_i1|m.3268/c100573_g3_i1|m.35195/c109924_g1_i3|m.82988/c101515_g1_i1|m.37973/c109845_g3_i1|m.82373/c110732_g1_i2|m.89648/c109845_g2_i1|m.82369/c111086_g3_i1|m.92774/c108987_g2_i3|m.76192/c98004_g6_i1|m.28466/c13355_g1_i1|m.1308/c111243_g2_i1|m.94167/c100431_g1_i1|m.34834/c95692_g3_i1|m.23818/c106352_g4_i1|m.59099/c104117_g1_i1|m.47932/c111090_g…	53
GO:0052543	callose deposition in cell wall	53/3804	236/43701	1.13765e-10	4.88356e-09	4.34321e-09	c100573_g2_i1|m.35194/c139116_g1_i1|m.98515/c29342_g2_i1|m.3268/c100573_g3_i1|m.35195/c109924_g1_i3|m.82988/c101515_g1_i1|m.37973/c109845_g3_i1|m.82373/c110732_g1_i2|m.89648/c109845_g2_i1|m.82369/c111086_g3_i1|m.92774/c108987_g2_i3|m.76192/c98004_g6_i1|m.28466/c13355_g1_i1|m.1308/c111243_g2_i1|m.94167/c100431_g1_i1|m.34834/c95692_g3_i1|m.23818/c106352_g4_i1|m.59099/c104117_g1_i1|m.47932/c111090_g…	53
GO:0075732	viral penetration into host nucleus	16/3804	28/43701	1.15803e-10	4.89151e-09	4.35029e-09	c106627_g5_i1|m.60652/c93238_g3_i1|m.20049/c181763_g1_i1|m.102764/c137846_g1_i1|m.98382/c90961_g1_i2|m.17881/c77377_g1_i1|m.10750/c59126_g1_i1|m.5767/c120581_g1_i1|m.96525/c110914_g4_i2|m.91336/c8649_g1_i1|m.697/c112289_g1_i1|m.95753/c102062_g2_i2|m.39768/c90280_g2_i1|m.17213/c110093_g2_i2|m.84318/c116718_g1_i1|m.96204/c134654_g1_i1|m.97841	16
GO:1902594	multi-organism nuclear import	16/3804	28/43701	1.15803e-10	4.89151e-09	4.35029e-09	c106627_g5_i1|m.60652/c93238_g3_i1|m.20049/c181763_g1_i1|m.102764/c137846_g1_i1|m.98382/c90961_g1_i2|m.17881/c77377_g1_i1|m.10750/c59126_g1_i1|m.5767/c120581_g1_i1|m.96525/c110914_g4_i2|m.91336/c8649_g1_i1|m.697/c112289_g1_i1|m.95753/c102062_g2_i2|m.39768/c90280_g2_i1|m.17213/c110093_g2_i2|m.84318/c116718_g1_i1|m.96204/c134654_g1_i1|m.97841	16
GO:0043034	costamere	25/3804	67/43701	1.27605e-10	5.30514e-09	4.71814e-09	c101230_g2_i3|m.37065/c104914_g5_i2|m.51528/c110875_g1_i3|m.90985/c90107_g1_i1|m.17049/c101230_g3_i2|m.37056/c110408_g2_i1|m.86753/c109550_g1_i7|m.80269/c101007_g1_i1|m.36407/c108589_g1_i1|m.73594/c110926_g1_i1|m.91432/c105922_g2_i1|m.56787/c110926_g1_i6|m.91441/c110926_g1_i4|m.91437/c107470_g3_i2|m.65850/c105922_g3_i1|m.56788/c110926_g2_i2|m.91440/c110926_g2_i1|m.91434/c62392_g1_i1|m.6368/c11095…	25
GO:0098901	regulation of cardiac muscle cell action potential	25/3804	67/43701	1.27605e-10	5.30514e-09	4.71814e-09	c101230_g2_i3|m.37065/c104914_g5_i2|m.51528/c110875_g1_i3|m.90985/c90107_g1_i1|m.17049/c101230_g3_i2|m.37056/c110408_g2_i1|m.86753/c109550_g1_i7|m.80269/c101007_g1_i1|m.36407/c108589_g1_i1|m.73594/c110926_g1_i1|m.91432/c105922_g2_i1|m.56787/c110926_g1_i6|m.91441/c110926_g1_i4|m.91437/c107470_g3_i2|m.65850/c105922_g3_i1|m.56788/c110926_g2_i2|m.91440/c110926_g2_i1|m.91434/c62392_g1_i1|m.6368/c11095…	25
GO:0010649	regulation of cell communication by electrical coupling	20/3804	44/43701	1.33512e-10	5.38124e-09	4.78583e-09	c104914_g5_i2|m.51528/c110875_g1_i3|m.90985/c90107_g1_i1|m.17049/c101230_g3_i2|m.37056/c110408_g2_i1|m.86753/c101007_g1_i1|m.36407/c108589_g1_i1|m.73594/c110926_g1_i1|m.91432/c105922_g2_i1|m.56787/c110926_g1_i4|m.91437/c107470_g3_i2|m.65850/c105922_g3_i1|m.56788/c110926_g2_i2|m.91440/c110926_g2_i1|m.91434/c62392_g1_i1|m.6368/c110957_g10_i2|m.91664/c111005_g1_i6|m.92127/c110731_g1_i6|m.89644/c7470…	20
GO:0010960	magnesium ion homeostasis	20/3804	44/43701	1.33512e-10	5.38124e-09	4.78583e-09	c104914_g5_i2|m.51528/c110875_g1_i3|m.90985/c90107_g1_i1|m.17049/c101230_g3_i2|m.37056/c110408_g2_i1|m.86753/c101007_g1_i1|m.36407/c108589_g1_i1|m.73594/c110926_g1_i1|m.91432/c105922_g2_i1|m.56787/c110926_g1_i4|m.91437/c107470_g3_i2|m.65850/c105922_g3_i1|m.56788/c110926_g2_i2|m.91440/c110926_g2_i1|m.91434/c62392_g1_i1|m.6368/c110957_g10_i2|m.91664/c111005_g1_i6|m.92127/c110731_g1_i6|m.89644/c7470…	20
GO:0032026	response to magnesium ion	20/3804	44/43701	1.33512e-10	5.38124e-09	4.78583e-09	c104914_g5_i2|m.51528/c110875_g1_i3|m.90985/c90107_g1_i1|m.17049/c101230_g3_i2|m.37056/c110408_g2_i1|m.86753/c101007_g1_i1|m.36407/c108589_g1_i1|m.73594/c110926_g1_i1|m.91432/c105922_g2_i1|m.56787/c110926_g1_i4|m.91437/c107470_g3_i2|m.65850/c105922_g3_i1|m.56788/c110926_g2_i2|m.91440/c110926_g2_i1|m.91434/c62392_g1_i1|m.6368/c110957_g10_i2|m.91664/c111005_g1_i6|m.92127/c110731_g1_i6|m.89644/c7470…	20
GO:0034112	positive regulation of homotypic cell-cell adhesion	20/3804	44/43701	1.33512e-10	5.38124e-09	4.78583e-09	c104914_g5_i2|m.51528/c110875_g1_i3|m.90985/c90107_g1_i1|m.17049/c101230_g3_i2|m.37056/c110408_g2_i1|m.86753/c101007_g1_i1|m.36407/c108589_g1_i1|m.73594/c110926_g1_i1|m.91432/c105922_g2_i1|m.56787/c110926_g1_i4|m.91437/c107470_g3_i2|m.65850/c105922_g3_i1|m.56788/c110926_g2_i2|m.91440/c110926_g2_i1|m.91434/c62392_g1_i1|m.6368/c110957_g10_i2|m.91664/c111005_g1_i6|m.92127/c110731_g1_i6|m.89644/c7470…	20
GO:0016529	sarcoplasmic reticulum	29/3804	88/43701	1.4468e-10	5.78719e-09	5.14686e-09	c101230_g2_i3|m.37065/c104914_g5_i2|m.51528/c110875_g1_i3|m.90985/c90107_g1_i1|m.17049/c101230_g3_i2|m.37056/c110408_g2_i1|m.86753/c101007_g1_i1|m.36407/c108589_g1_i1|m.73594/c110926_g1_i1|m.91432/c105922_g2_i1|m.56787/c110926_g1_i4|m.91437/c107470_g3_i2|m.65850/c107470_g3_i6|m.65857/c105922_g3_i1|m.56788/c110926_g2_i2|m.91440/c110926_g2_i1|m.91434/c62392_g1_i1|m.6368/c110957_g10_i2|m.91664/c1110…	29
GO:0019043	establishment of viral latency	27/3804	78/43701	1.73638e-10	6.84187e-09	6.08484e-09	c106627_g5_i1|m.60652/c93238_g3_i1|m.20049/c80585_g3_i1|m.11680/c91708_g2_i1|m.18593/c110234_g7_i1|m.85469/c137846_g1_i1|m.98382/c90961_g1_i2|m.17881/c106981_g2_i2|m.62738/c51404_g1_i1|m.5408/c110988_g1_i1|m.91949/c77377_g1_i1|m.10750/c59126_g1_i1|m.5767/c100255_g3_i1|m.34346/c120581_g1_i1|m.96525/c97949_g1_i2|m.28359/c110914_g4_i2|m.91336/c96109_g1_i1|m.24532/c99963_g5_i1|m.33435/c8649_g1_i1|m.6…	27
GO:0075713	establishment of integrated proviral latency	27/3804	78/43701	1.73638e-10	6.84187e-09	6.08484e-09	c106627_g5_i1|m.60652/c93238_g3_i1|m.20049/c80585_g3_i1|m.11680/c91708_g2_i1|m.18593/c110234_g7_i1|m.85469/c137846_g1_i1|m.98382/c90961_g1_i2|m.17881/c106981_g2_i2|m.62738/c51404_g1_i1|m.5408/c110988_g1_i1|m.91949/c77377_g1_i1|m.10750/c59126_g1_i1|m.5767/c100255_g3_i1|m.34346/c120581_g1_i1|m.96525/c97949_g1_i2|m.28359/c110914_g4_i2|m.91336/c96109_g1_i1|m.24532/c99963_g5_i1|m.33435/c8649_g1_i1|m.6…	27
GO:0010618	aerenchyma formation	26/3804	73/43701	1.82467e-10	7.13648e-09	6.34686e-09	c106807_g2_i1|m.61728/c108175_g4_i3|m.70623/c108175_g4_i1|m.70621/c108175_g4_i5|m.70625/c74723_g2_i2|m.10005/c109214_g4_i2|m.77804/c105245_g12_i1|m.53306/c107464_g5_i1|m.65802/c75972_g1_i1|m.10328/c107464_g7_i1|m.65807/c107464_g2_i1|m.65801/c109563_g2_i1|m.80388/c109774_g1_i8|m.81825/c109774_g1_i1|m.81817/c109774_g1_i10|m.81827/c109563_g2_i11|m.80402/c109563_g2_i10|m.80401/c109563_g2_i4|m.80393/c…	26
GO:0045838	positive regulation of membrane potential	20/3804	45/43701	2.2059e-10	8.56409e-09	7.61651e-09	c104914_g5_i2|m.51528/c110875_g1_i3|m.90985/c90107_g1_i1|m.17049/c101230_g3_i2|m.37056/c110408_g2_i1|m.86753/c101007_g1_i1|m.36407/c108589_g1_i1|m.73594/c110926_g1_i1|m.91432/c105922_g2_i1|m.56787/c110926_g1_i4|m.91437/c107470_g3_i2|m.65850/c105922_g3_i1|m.56788/c110926_g2_i2|m.91440/c110926_g2_i1|m.91434/c62392_g1_i1|m.6368/c110957_g10_i2|m.91664/c111005_g1_i6|m.92127/c110731_g1_i6|m.89644/c7470…	20
GO:0086001	cardiac muscle cell action potential	25/3804	69/43701	2.66256e-10	1.02616e-08	9.12616e-09	c101230_g2_i3|m.37065/c104914_g5_i2|m.51528/c110875_g1_i3|m.90985/c90107_g1_i1|m.17049/c101230_g3_i2|m.37056/c110408_g2_i1|m.86753/c109550_g1_i7|m.80269/c101007_g1_i1|m.36407/c108589_g1_i1|m.73594/c110926_g1_i1|m.91432/c105922_g2_i1|m.56787/c110926_g1_i6|m.91441/c110926_g1_i4|m.91437/c107470_g3_i2|m.65850/c105922_g3_i1|m.56788/c110926_g2_i2|m.91440/c110926_g2_i1|m.91434/c62392_g1_i1|m.6368/c11095…	25
GO:0030018	Z disc	40/3804	155/43701	2.71768e-10	1.03981e-08	9.24759e-09	c101230_g2_i3|m.37065/c104914_g5_i2|m.51528/c110875_g1_i3|m.90985/c90107_g1_i1|m.17049/c101230_g3_i2|m.37056/c110408_g2_i1|m.86753/c109550_g1_i7|m.80269/c101007_g1_i1|m.36407/c108589_g1_i1|m.73594/c110926_g1_i1|m.91432/c105922_g2_i1|m.56787/c110926_g1_i6|m.91441/c110926_g1_i4|m.91437/c107470_g3_i2|m.65850/c105922_g3_i1|m.56788/c110926_g2_i2|m.91440/c110926_g2_i1|m.91434/c62392_g1_i1|m.6368/c11095…	40
GO:0070370	cellular heat acclimation	30/3804	96/43701	3.07432e-10	1.1678e-08	1.03859e-08	c108870_g2_i1|m.75435/c123324_g1_i1|m.96984/c73376_g1_i1|m.9813/c98004_g2_i1|m.28460/c105531_g4_i1|m.54790/c100431_g1_i1|m.34834/c109916_g1_i5|m.82933/c109916_g1_i4|m.82931/c109916_g1_i1|m.82919/c107529_g2_i1|m.66180/c111243_g2_i1|m.94168/c111243_g2_i2|m.94170/c81641_g1_i1|m.11915/c89991_g1_i1|m.16952/c95692_g2_i1|m.23817/c104139_g3_i1|m.48038/c104139_g3_i2|m.48039/c105177_g1_i5|m.52954/c111379_g…	30
GO:0014704	intercalated disc	26/3804	75/43701	3.62207e-10	1.36604e-08	1.21489e-08	c101230_g2_i3|m.37065/c104914_g5_i2|m.51528/c110875_g1_i3|m.90985/c90107_g1_i1|m.17049/c101230_g3_i2|m.37056/c110408_g2_i1|m.86753/c109550_g1_i7|m.80269/c101007_g1_i1|m.36407/c108589_g1_i1|m.73594/c110926_g1_i1|m.91432/c105922_g2_i1|m.56787/c110926_g1_i6|m.91441/c110926_g1_i4|m.91437/c107470_g3_i2|m.65850/c105922_g3_i1|m.56788/c110926_g2_i2|m.91440/c110926_g2_i1|m.91434/c62392_g1_i1|m.6368/c11095…	26
GO:0086012	membrane depolarization during cardiac muscle cell action potential	23/3804	60/43701	3.70711e-10	1.38819e-08	1.2346e-08	c101230_g2_i3|m.37065/c104914_g5_i2|m.51528/c110875_g1_i3|m.90985/c90107_g1_i1|m.17049/c101230_g3_i2|m.37056/c110408_g2_i1|m.86753/c109550_g1_i7|m.80269/c101007_g1_i1|m.36407/c108589_g1_i1|m.73594/c110926_g1_i1|m.91432/c105922_g2_i1|m.56787/c110926_g1_i4|m.91437/c107470_g3_i2|m.65850/c105922_g3_i1|m.56788/c110926_g2_i2|m.91440/c110926_g2_i1|m.91434/c62392_g1_i1|m.6368/c110957_g10_i2|m.91664/c1110…	23
GO:1902305	regulation of sodium ion transmembrane transport	20/3804	47/43701	5.72425e-10	2.11357e-08	1.87971e-08	c104914_g5_i2|m.51528/c110875_g1_i3|m.90985/c90107_g1_i1|m.17049/c101230_g3_i2|m.37056/c110408_g2_i1|m.86753/c101007_g1_i1|m.36407/c108589_g1_i1|m.73594/c110926_g1_i1|m.91432/c105922_g2_i1|m.56787/c110926_g1_i4|m.91437/c107470_g3_i2|m.65850/c105922_g3_i1|m.56788/c110926_g2_i2|m.91440/c110926_g2_i1|m.91434/c62392_g1_i1|m.6368/c110957_g10_i2|m.91664/c111005_g1_i6|m.92127/c110731_g1_i6|m.89644/c7470…	20
GO:2000649	regulation of sodium ion transmembrane transporter activity	20/3804	47/43701	5.72425e-10	2.11357e-08	1.87971e-08	c104914_g5_i2|m.51528/c110875_g1_i3|m.90985/c90107_g1_i1|m.17049/c101230_g3_i2|m.37056/c110408_g2_i1|m.86753/c101007_g1_i1|m.36407/c108589_g1_i1|m.73594/c110926_g1_i1|m.91432/c105922_g2_i1|m.56787/c110926_g1_i4|m.91437/c107470_g3_i2|m.65850/c105922_g3_i1|m.56788/c110926_g2_i2|m.91440/c110926_g2_i1|m.91434/c62392_g1_i1|m.6368/c110957_g10_i2|m.91664/c111005_g1_i6|m.92127/c110731_g1_i6|m.89644/c7470…	20
GO:0016328	lateral plasma membrane	32/3804	110/43701	6.20125e-10	2.27379e-08	2.02221e-08	c110875_g1_i3|m.90985/c90107_g1_i1|m.17049/c101230_g3_i2|m.37056/c110408_g2_i1|m.86753/c101007_g1_i1|m.36407/c108589_g1_i1|m.73594/c110926_g1_i1|m.91432/c105922_g2_i1|m.56787/c110926_g1_i4|m.91437/c105922_g3_i1|m.56788/c110926_g2_i2|m.91440/c110926_g2_i1|m.91434/c62392_g1_i1|m.6368/c110957_g10_i2|m.91664/c109536_g2_i4|m.80076/c110731_g1_i6|m.89644/c111090_g1_i1|m.92876/c106561_g1_i1|m.60221/c1108…	32
GO:0019042	viral latency	27/3804	82/43701	6.29956e-10	2.29391e-08	2.0401e-08	c106627_g5_i1|m.60652/c93238_g3_i1|m.20049/c80585_g3_i1|m.11680/c91708_g2_i1|m.18593/c110234_g7_i1|m.85469/c137846_g1_i1|m.98382/c90961_g1_i2|m.17881/c106981_g2_i2|m.62738/c51404_g1_i1|m.5408/c110988_g1_i1|m.91949/c77377_g1_i1|m.10750/c59126_g1_i1|m.5767/c100255_g3_i1|m.34346/c120581_g1_i1|m.96525/c97949_g1_i2|m.28359/c110914_g4_i2|m.91336/c96109_g1_i1|m.24532/c99963_g5_i1|m.33435/c8649_g1_i1|m.6…	27
GO:0016528	sarcoplasm	29/3804	93/43701	6.39269e-10	2.31188e-08	2.05608e-08	c101230_g2_i3|m.37065/c104914_g5_i2|m.51528/c110875_g1_i3|m.90985/c90107_g1_i1|m.17049/c101230_g3_i2|m.37056/c110408_g2_i1|m.86753/c101007_g1_i1|m.36407/c108589_g1_i1|m.73594/c110926_g1_i1|m.91432/c105922_g2_i1|m.56787/c110926_g1_i4|m.91437/c107470_g3_i2|m.65850/c107470_g3_i6|m.65857/c105922_g3_i1|m.56788/c110926_g2_i2|m.91440/c110926_g2_i1|m.91434/c62392_g1_i1|m.6368/c110957_g10_i2|m.91664/c1110…	29
GO:0034109	homotypic cell-cell adhesion	23/3804	62/43701	7.96433e-10	2.86066e-08	2.54414e-08	c104914_g5_i2|m.51528/c110875_g1_i3|m.90985/c90107_g1_i1|m.17049/c101230_g3_i2|m.37056/c110408_g2_i1|m.86753/c101007_g1_i1|m.36407/c108589_g1_i1|m.73594/c110926_g1_i1|m.91432/c105922_g2_i1|m.56787/c110926_g1_i4|m.91437/c107470_g3_i2|m.65850/c105922_g3_i1|m.56788/c110926_g2_i2|m.91440/c110926_g2_i1|m.91434/c62392_g1_i1|m.6368/c110957_g10_i2|m.91664/c111005_g1_i6|m.92127/c110731_g1_i6|m.89644/c1622…	23
GO:0031672	A band	33/3804	117/43701	8.17378e-10	2.91605e-08	2.5934e-08	c101230_g2_i3|m.37065/c110875_g1_i3|m.90985/c90107_g1_i1|m.17049/c101230_g3_i2|m.37056/c109550_g1_i7|m.80269/c110926_g1_i6|m.91441/c110926_g1_i4|m.91437/c105922_g3_i1|m.56788/c110926_g2_i2|m.91440/c110926_g2_i1|m.91434/c62392_g1_i1|m.6368/c154994_g1_i1|m.100054/c110731_g1_i3|m.89639/c110731_g1_i4|m.89640/c110731_g1_i6|m.89644/c107738_g1_i1|m.67664/c107738_g1_i4|m.67668/c15104_g1_i1|m.1551/c8278_g…	33
GO:0006936	muscle contraction	37/3804	142/43701	9.32055e-10	3.30285e-08	2.9374e-08	c101230_g2_i3|m.37065/c110875_g1_i3|m.90985/c101230_g3_i2|m.37056/c109550_g1_i7|m.80269/c110926_g1_i6|m.91441/c110926_g1_i4|m.91437/c105922_g3_i1|m.56788/c154994_g1_i1|m.100054/c111174_g4_i2|m.93623/c110731_g1_i6|m.89644/c107738_g1_i1|m.67664/c107738_g1_i4|m.67668/c35192_g2_i1|m.3753/c15104_g1_i1|m.1551/c72524_g3_i1|m.9634/c8278_g1_i2|m.642/c36762_g1_i1|m.3884/c180099_g1_i1|m.102614/c63845_g2_i1|…	37
GO:0051828	entry into other organism involved in symbiotic interaction	32/3804	112/43701	1.02526e-09	3.60893e-08	3.20961e-08	c106627_g5_i1|m.60652/c93238_g3_i1|m.20049/c181763_g1_i1|m.102764/c80585_g3_i1|m.11680/c91708_g2_i1|m.18593/c110234_g7_i1|m.85469/c137846_g1_i1|m.98382/c90961_g1_i2|m.17881/c106981_g2_i2|m.62738/c51404_g1_i1|m.5408/c110988_g1_i1|m.91949/c77377_g1_i1|m.10750/c59126_g1_i1|m.5767/c39930_g1_i1|m.4222/c175676_g1_i1|m.102054/c65162_g1_i1|m.7023/c100255_g3_i1|m.34346/c120581_g1_i1|m.96525/c97949_g1_i2|m…	32
GO:0002028	regulation of sodium ion transport	20/3804	49/43701	1.39717e-09	4.85332e-08	4.31632e-08	c104914_g5_i2|m.51528/c110875_g1_i3|m.90985/c90107_g1_i1|m.17049/c101230_g3_i2|m.37056/c110408_g2_i1|m.86753/c101007_g1_i1|m.36407/c108589_g1_i1|m.73594/c110926_g1_i1|m.91432/c105922_g2_i1|m.56787/c110926_g1_i4|m.91437/c107470_g3_i2|m.65850/c105922_g3_i1|m.56788/c110926_g2_i2|m.91440/c110926_g2_i1|m.91434/c62392_g1_i1|m.6368/c110957_g10_i2|m.91664/c111005_g1_i6|m.92127/c110731_g1_i6|m.89644/c7470…	20
GO:0034110	regulation of homotypic cell-cell adhesion	20/3804	49/43701	1.39717e-09	4.85332e-08	4.31632e-08	c104914_g5_i2|m.51528/c110875_g1_i3|m.90985/c90107_g1_i1|m.17049/c101230_g3_i2|m.37056/c110408_g2_i1|m.86753/c101007_g1_i1|m.36407/c108589_g1_i1|m.73594/c110926_g1_i1|m.91432/c105922_g2_i1|m.56787/c110926_g1_i4|m.91437/c107470_g3_i2|m.65850/c105922_g3_i1|m.56788/c110926_g2_i2|m.91440/c110926_g2_i1|m.91434/c62392_g1_i1|m.6368/c110957_g10_i2|m.91664/c111005_g1_i6|m.92127/c110731_g1_i6|m.89644/c7470…	20
GO:0004536	deoxyribonuclease activity	78/3804	442/43701	1.59094e-09	5.4903e-08	4.88282e-08	c101363_g2_i1|m.37518/c110076_g4_i1|m.84197/c73204_g1_i1|m.9762/c105148_g2_i1|m.52811/c109330_g3_i1|m.78544/c89791_g1_i1|m.16793/c64792_g1_i1|m.6975/c148582_g1_i1|m.99336/c27446_g1_i1|m.2908/c110358_g6_i1|m.86394/c107139_g4_i1|m.63644/c99688_g1_i1|m.32606/c90086_g1_i1|m.17037/c99286_g3_i1|m.31744/c107139_g4_i1|m.63645/c147635_g1_i1|m.99105/c88443_g2_i1|m.15781/c64486_g1_i1|m.6913/c72463_g1_i1|m.9…	78
GO:0045460	sterigmatocystin metabolic process	16/3804	32/43701	1.63008e-09	5.5528e-08	4.93841e-08	c103825_g1_i1|m.46711/c77916_g1_i1|m.10959/c78819_g3_i1|m.11237/c102046_g1_i1|m.39705/c103790_g1_i1|m.46606/c93405_g1_i1|m.20222/c93324_g1_i1|m.20136/c29263_g1_i1|m.3235/c148853_g1_i1|m.99390/c175676_g1_i1|m.102054/c65162_g1_i1|m.7023/c10575_g1_i1|m.902/c94239_g1_i1|m.21321/c97730_g1_i1|m.27870/c12560_g1_i1|m.1151/c98631_g1_i1|m.29906	16
GO:0045461	sterigmatocystin biosynthetic process	16/3804	32/43701	1.63008e-09	5.5528e-08	4.93841e-08	c103825_g1_i1|m.46711/c77916_g1_i1|m.10959/c78819_g3_i1|m.11237/c102046_g1_i1|m.39705/c103790_g1_i1|m.46606/c93405_g1_i1|m.20222/c93324_g1_i1|m.20136/c29263_g1_i1|m.3235/c148853_g1_i1|m.99390/c175676_g1_i1|m.102054/c65162_g1_i1|m.7023/c10575_g1_i1|m.902/c94239_g1_i1|m.21321/c97730_g1_i1|m.27870/c12560_g1_i1|m.1151/c98631_g1_i1|m.29906	16
GO:0030315	T-tubule	25/3804	75/43701	2.01034e-09	6.80422e-08	6.05136e-08	c101230_g2_i3|m.37065/c104914_g5_i2|m.51528/c110875_g1_i3|m.90985/c90107_g1_i1|m.17049/c101230_g3_i2|m.37056/c110408_g2_i1|m.86753/c109550_g1_i7|m.80269/c101007_g1_i1|m.36407/c108589_g1_i1|m.73594/c110926_g1_i1|m.91432/c105922_g2_i1|m.56787/c110926_g1_i6|m.91441/c110926_g1_i4|m.91437/c107470_g3_i2|m.65850/c105922_g3_i1|m.56788/c110926_g2_i2|m.91440/c110926_g2_i1|m.91434/c62392_g1_i1|m.6368/c11095…	25
GO:1904181	positive regulation of membrane depolarization	20/3804	50/43701	2.13765e-09	7.18903e-08	6.39359e-08	c104914_g5_i2|m.51528/c110875_g1_i3|m.90985/c90107_g1_i1|m.17049/c101230_g3_i2|m.37056/c110408_g2_i1|m.86753/c101007_g1_i1|m.36407/c108589_g1_i1|m.73594/c110926_g1_i1|m.91432/c105922_g2_i1|m.56787/c110926_g1_i4|m.91437/c107470_g3_i2|m.65850/c105922_g3_i1|m.56788/c110926_g2_i2|m.91440/c110926_g2_i1|m.91434/c62392_g1_i1|m.6368/c110957_g10_i2|m.91664/c111005_g1_i6|m.92127/c110731_g1_i6|m.89644/c7470…	20
GO:0009720	detection of hormone stimulus	23/3804	65/43701	2.34102e-09	7.72538e-08	6.8706e-08	c98004_g5_i1|m.28465/c13355_g1_i1|m.1308/c109916_g2_i6|m.82935/c109916_g2_i2|m.82923/c109916_g2_i3|m.82928/c107529_g3_i1|m.66181/c101109_g1_i1|m.36687/c85263_g1_i1|m.13782/c85263_g2_i1|m.13783/c81641_g1_i1|m.11915/c100939_g1_i2|m.36240/c107187_g1_i2|m.63916/c91962_g1_i1|m.18805/c61851_g2_i1|m.6188/c100573_g1_i1|m.35193/c101701_g1_i1|m.38595/c107529_g6_i1|m.66188/c109845_g1_i2|m.82372/c105531_g7_i…	23
GO:0009726	detection of endogenous stimulus	23/3804	65/43701	2.34102e-09	7.72538e-08	6.8706e-08	c98004_g5_i1|m.28465/c13355_g1_i1|m.1308/c109916_g2_i6|m.82935/c109916_g2_i2|m.82923/c109916_g2_i3|m.82928/c107529_g3_i1|m.66181/c101109_g1_i1|m.36687/c85263_g1_i1|m.13782/c85263_g2_i1|m.13783/c81641_g1_i1|m.11915/c100939_g1_i2|m.36240/c107187_g1_i2|m.63916/c91962_g1_i1|m.18805/c61851_g2_i1|m.6188/c100573_g1_i1|m.35193/c101701_g1_i1|m.38595/c107529_g6_i1|m.66188/c109845_g1_i2|m.82372/c105531_g7_i…	23
GO:0086010	membrane depolarization during action potential	23/3804	65/43701	2.34102e-09	7.72538e-08	6.8706e-08	c101230_g2_i3|m.37065/c104914_g5_i2|m.51528/c110875_g1_i3|m.90985/c90107_g1_i1|m.17049/c101230_g3_i2|m.37056/c110408_g2_i1|m.86753/c109550_g1_i7|m.80269/c101007_g1_i1|m.36407/c108589_g1_i1|m.73594/c110926_g1_i1|m.91432/c105922_g2_i1|m.56787/c110926_g1_i4|m.91437/c107470_g3_i2|m.65850/c105922_g3_i1|m.56788/c110926_g2_i2|m.91440/c110926_g2_i1|m.91434/c62392_g1_i1|m.6368/c110957_g10_i2|m.91664/c1110…	23
GO:0044291	cell-cell contact zone	26/3804	81/43701	2.41477e-09	7.91923e-08	7.043e-08	c101230_g2_i3|m.37065/c104914_g5_i2|m.51528/c110875_g1_i3|m.90985/c90107_g1_i1|m.17049/c101230_g3_i2|m.37056/c110408_g2_i1|m.86753/c109550_g1_i7|m.80269/c101007_g1_i1|m.36407/c108589_g1_i1|m.73594/c110926_g1_i1|m.91432/c105922_g2_i1|m.56787/c110926_g1_i6|m.91441/c110926_g1_i4|m.91437/c107470_g3_i2|m.65850/c105922_g3_i1|m.56788/c110926_g2_i2|m.91440/c110926_g2_i1|m.91434/c62392_g1_i1|m.6368/c11095…	26
GO:0010588	cotyledon vascular tissue pattern formation	56/3804	280/43701	3.38525e-09	1.10334e-07	9.81259e-08	c108091_g6_i1|m.70087/c137764_g1_i1|m.98370/c106654_g9_i1|m.60803/c87097_g3_i1|m.15139/c153008_g1_i1|m.99896/c104973_g9_i1|m.51829/c108091_g2_i1|m.70079/c182109_g1_i1|m.102801/c162128_g1_i1|m.100695/c106654_g4_i1|m.60793/c106556_g3_i1|m.60196/c108091_g9_i1|m.70090/c110588_g8_i1|m.88371/c102936_g15_i1|m.42930/c103696_g7_i2|m.46222/c104973_g6_i1|m.51825/c21064_g1_i1|m.2317/c31796_g1_i1|m.3582/c9514…	56
GO:0031674	I band	41/3804	175/43701	3.72439e-09	1.20643e-07	1.07294e-07	c101230_g2_i3|m.37065/c104914_g5_i2|m.51528/c110875_g1_i3|m.90985/c90107_g1_i1|m.17049/c101230_g3_i2|m.37056/c110408_g2_i1|m.86753/c109550_g1_i7|m.80269/c101007_g1_i1|m.36407/c108589_g1_i1|m.73594/c110926_g1_i1|m.91432/c105922_g2_i1|m.56787/c110926_g1_i6|m.91441/c110926_g1_i4|m.91437/c105922_g1_i1|m.56783/c107470_g3_i2|m.65850/c105922_g3_i1|m.56788/c110926_g2_i2|m.91440/c110926_g2_i1|m.91434/c623…	41
GO:0000304	response to singlet oxygen	28/3804	94/43701	3.97964e-09	1.28125e-07	1.13948e-07	c106807_g2_i1|m.61728/c108175_g4_i3|m.70623/c108175_g4_i1|m.70621/c108175_g4_i5|m.70625/c74723_g2_i2|m.10005/c109214_g4_i2|m.77804/c105245_g12_i1|m.53306/c107464_g5_i1|m.65802/c75972_g1_i1|m.10328/c107464_g7_i1|m.65807/c107464_g2_i1|m.65801/c109563_g2_i1|m.80388/c109774_g1_i8|m.81825/c109774_g1_i1|m.81817/c109774_g1_i10|m.81827/c109563_g2_i11|m.80402/c109563_g2_i10|m.80401/c109563_g2_i4|m.80393/c…	28
GO:0030260	entry into host cell	29/3804	101/43701	5.3976e-09	1.71683e-07	1.52687e-07	c106627_g5_i1|m.60652/c93238_g3_i1|m.20049/c181763_g1_i1|m.102764/c80585_g3_i1|m.11680/c91708_g2_i1|m.18593/c110234_g7_i1|m.85469/c137846_g1_i1|m.98382/c90961_g1_i2|m.17881/c106981_g2_i2|m.62738/c51404_g1_i1|m.5408/c110988_g1_i1|m.91949/c77377_g1_i1|m.10750/c59126_g1_i1|m.5767/c100255_g3_i1|m.34346/c120581_g1_i1|m.96525/c97949_g1_i2|m.28359/c110914_g4_i2|m.91336/c96109_g1_i1|m.24532/c99963_g5_i1|…	29
GO:0051806	entry into cell of other organism involved in symbiotic interaction	29/3804	101/43701	5.3976e-09	1.71683e-07	1.52687e-07	c106627_g5_i1|m.60652/c93238_g3_i1|m.20049/c181763_g1_i1|m.102764/c80585_g3_i1|m.11680/c91708_g2_i1|m.18593/c110234_g7_i1|m.85469/c137846_g1_i1|m.98382/c90961_g1_i2|m.17881/c106981_g2_i2|m.62738/c51404_g1_i1|m.5408/c110988_g1_i1|m.91949/c77377_g1_i1|m.10750/c59126_g1_i1|m.5767/c100255_g3_i1|m.34346/c120581_g1_i1|m.96525/c97949_g1_i2|m.28359/c110914_g4_i2|m.91336/c96109_g1_i1|m.24532/c99963_g5_i1|…	29
GO:1901376	organic heteropentacyclic compound metabolic process	26/3804	84/43701	5.75551e-09	1.81971e-07	1.61836e-07	c103825_g1_i1|m.46711/c77916_g1_i1|m.10959/c78819_g3_i1|m.11237/c102046_g1_i1|m.39705/c103790_g1_i1|m.46606/c93405_g1_i1|m.20222/c93324_g1_i1|m.20136/c29263_g1_i1|m.3235/c148853_g1_i1|m.99390/c175676_g1_i1|m.102054/c65162_g1_i1|m.7023/c107214_g1_i14|m.64166/c107214_g1_i8|m.64161/c107214_g1_i7|m.64160/c109635_g8_i1|m.80826/c107530_g1_i11|m.66203/c89265_g1_i1|m.16247/c107530_g1_i8|m.66198/c70219_g1…	26
GO:0048656	anther wall tapetum formation	36/3804	145/43701	6.35291e-09	1.98481e-07	1.7652e-07	c98004_g5_i1|m.28465/c13355_g1_i1|m.1308/c109916_g2_i6|m.82935/c109916_g2_i2|m.82923/c109916_g2_i3|m.82928/c107529_g3_i1|m.66181/c101109_g1_i1|m.36687/c124232_g1_i1|m.97076/c110767_g1_i2|m.89970/c85263_g1_i1|m.13782/c85263_g2_i1|m.13783/c81641_g1_i1|m.11915/c163295_g1_i1|m.100910/c14235_g1_i1|m.1407/c111270_g3_i8|m.94353/c100939_g1_i2|m.36240/c104117_g4_i1|m.47939/c107187_g1_i2|m.63916/c91962_g1_…	36
GO:0048657	anther wall tapetum cell differentiation	36/3804	145/43701	6.35291e-09	1.98481e-07	1.7652e-07	c98004_g5_i1|m.28465/c13355_g1_i1|m.1308/c109916_g2_i6|m.82935/c109916_g2_i2|m.82923/c109916_g2_i3|m.82928/c107529_g3_i1|m.66181/c101109_g1_i1|m.36687/c124232_g1_i1|m.97076/c110767_g1_i2|m.89970/c85263_g1_i1|m.13782/c85263_g2_i1|m.13783/c81641_g1_i1|m.11915/c163295_g1_i1|m.100910/c14235_g1_i1|m.1407/c111270_g3_i8|m.94353/c100939_g1_i2|m.36240/c104117_g4_i1|m.47939/c107187_g1_i2|m.63916/c91962_g1_…	36
GO:0050403	trans-zeatin O-beta-D-glucosyltransferase activity	31/3804	115/43701	8.64926e-09	2.68636e-07	2.38913e-07	c104537_g1_i2|m.49789/c104843_g2_i1|m.51191/c104843_g3_i1|m.51196/c77782_g1_i2|m.10898/c104843_g1_i1|m.51190/c106277_g1_i1|m.58707/c106277_g1_i2|m.58708/c111109_g1_i4|m.93081/c106552_g1_i3|m.60172/c106552_g1_i6|m.60178/c106552_g1_i8|m.60181/c104273_g3_i1|m.48661/c104273_g3_i3|m.48668/c106341_g1_i1|m.59031/c106341_g1_i2|m.59033/c106523_g1_i1|m.60018/c106523_g2_i1|m.60020/c106523_g4_i1|m.60022/c106…	31
GO:0071782	endoplasmic reticulum tubular network	36/3804	147/43701	9.38291e-09	2.88033e-07	2.56164e-07	c111169_g3_i1|m.93563/c108685_g4_i1|m.74187/c109866_g2_i1|m.82528/c106804_g1_i1|m.61714/c106804_g2_i1|m.61715/c164198_g1_i1|m.101020/c104117_g1_i1|m.47932/c104117_g7_i1|m.47941/c98178_g1_i1|m.28873/c104117_g7_i2|m.47942/c100939_g1_i1|m.36239/c100939_g1_i2|m.36240/c106489_g1_i2|m.59785/c102984_g1_i1|m.43076/c110390_g4_i5|m.86604/c116458_g1_i1|m.96179/c61851_g2_i1|m.6188/c109183_g4_i3|m.77656/c1091…	36
GO:0098827	endoplasmic reticulum subcompartment	36/3804	147/43701	9.38291e-09	2.88033e-07	2.56164e-07	c111169_g3_i1|m.93563/c108685_g4_i1|m.74187/c109866_g2_i1|m.82528/c106804_g1_i1|m.61714/c106804_g2_i1|m.61715/c164198_g1_i1|m.101020/c104117_g1_i1|m.47932/c104117_g7_i1|m.47941/c98178_g1_i1|m.28873/c104117_g7_i2|m.47942/c100939_g1_i1|m.36239/c100939_g1_i2|m.36240/c106489_g1_i2|m.59785/c102984_g1_i1|m.43076/c110390_g4_i5|m.86604/c116458_g1_i1|m.96179/c61851_g2_i1|m.6188/c109183_g4_i3|m.77656/c1091…	36
GO:1902025	nitrate import	26/3804	86/43701	1.00011e-08	3.05236e-07	2.71463e-07	c73376_g1_i1|m.9813/c110767_g1_i2|m.89970/c85263_g1_i1|m.13782/c100651_g1_i2|m.35407/c100939_g1_i1|m.36239/c100939_g1_i2|m.36240/c109950_g2_i5|m.83198/c109950_g2_i1|m.83191/c109950_g2_i2|m.83192/c105380_g1_i1|m.54055/c110744_g4_i1|m.89747/c110744_g3_i1|m.89742/c110053_g4_i1|m.84022/c110053_g5_i1|m.84024/c91215_g2_i1|m.18153/c95597_g2_i1|m.23587/c85577_g1_i1|m.13914/c107055_g9_i2|m.63120/c110587_g…	26
GO:0003254	regulation of membrane depolarization	20/3804	54/43701	1.03543e-08	3.14199e-07	2.79434e-07	c104914_g5_i2|m.51528/c110875_g1_i3|m.90985/c90107_g1_i1|m.17049/c101230_g3_i2|m.37056/c110408_g2_i1|m.86753/c101007_g1_i1|m.36407/c108589_g1_i1|m.73594/c110926_g1_i1|m.91432/c105922_g2_i1|m.56787/c110926_g1_i4|m.91437/c107470_g3_i2|m.65850/c105922_g3_i1|m.56788/c110926_g2_i2|m.91440/c110926_g2_i1|m.91434/c62392_g1_i1|m.6368/c110957_g10_i2|m.91664/c111005_g1_i6|m.92127/c110731_g1_i6|m.89644/c7470…	20
GO:0060048	cardiac muscle contraction	24/3804	75/43701	1.05269e-08	3.17612e-07	2.8247e-07	c101230_g2_i3|m.37065/c110875_g1_i3|m.90985/c101230_g3_i2|m.37056/c109550_g1_i7|m.80269/c110926_g1_i6|m.91441/c110926_g1_i4|m.91437/c105922_g3_i1|m.56788/c110731_g1_i6|m.89644/c107738_g1_i1|m.67664/c107738_g1_i4|m.67668/c72524_g3_i1|m.9634/c36762_g1_i1|m.3884/c60241_g1_i1|m.5980/c24515_g1_i1|m.2633/c162075_g1_i1|m.100681/c140384_g1_i1|m.98628/c41934_g1_i1|m.4629/c153397_g1_i1|m.99927/c2238_g2_i1|…	24
GO:0042383	sarcolemma	30/3804	110/43701	1.11242e-08	3.33725e-07	2.968e-07	c101230_g2_i3|m.37065/c104914_g5_i2|m.51528/c110875_g1_i3|m.90985/c90107_g1_i1|m.17049/c101230_g3_i2|m.37056/c110408_g2_i1|m.86753/c109550_g1_i7|m.80269/c101007_g1_i1|m.36407/c108589_g1_i1|m.73594/c110926_g1_i1|m.91432/c105922_g2_i1|m.56787/c110926_g1_i6|m.91441/c110926_g1_i4|m.91437/c107470_g3_i2|m.65850/c105922_g3_i1|m.56788/c110926_g2_i2|m.91440/c110926_g2_i1|m.91434/c62392_g1_i1|m.6368/c11095…	30
GO:0044304	main axon	30/3804	111/43701	1.39794e-08	4.17012e-07	3.70871e-07	c101230_g2_i3|m.37065/c104914_g5_i2|m.51528/c110875_g1_i3|m.90985/c90107_g1_i1|m.17049/c101230_g3_i2|m.37056/c110408_g2_i1|m.86753/c101007_g1_i1|m.36407/c108589_g1_i1|m.73594/c110926_g1_i1|m.91432/c105922_g2_i1|m.56787/c110926_g1_i4|m.91437/c107470_g3_i2|m.65850/c105922_g3_i1|m.56788/c110926_g2_i2|m.91440/c110926_g2_i1|m.91434/c62392_g1_i1|m.6368/c110957_g10_i2|m.91664/c111005_g1_i6|m.92127/c1107…	30
GO:0042025	host cell nucleus	16/3804	36/43701	1.41259e-08	4.19014e-07	3.72652e-07	c106627_g5_i1|m.60652/c93238_g3_i1|m.20049/c80585_g3_i1|m.11680/c91708_g2_i1|m.18593/c137846_g1_i1|m.98382/c90961_g1_i2|m.17881/c77377_g1_i1|m.10750/c59126_g1_i1|m.5767/c120581_g1_i1|m.96525/c110914_g4_i2|m.91336/c8649_g1_i1|m.697/c112289_g1_i1|m.95753/c102062_g2_i2|m.39768/c90280_g2_i1|m.17213/c110093_g2_i2|m.84318/c116718_g1_i1|m.96204	16
GO:0009742	brassinosteroid mediated signaling pathway	77/3804	456/43701	1.47836e-08	4.34236e-07	3.8619e-07	c109924_g1_i3|m.82988/c110732_g1_i2|m.89648/c109845_g2_i1|m.82369/c111169_g3_i1|m.93563/c108987_g2_i2|m.76190/c98004_g2_i1|m.28460/c109696_g6_i2|m.81216/c98004_g1_i1|m.28459/c105531_g5_i1|m.54791/c98004_g5_i1|m.28465/c111174_g2_i8|m.93634/c105064_g1_i3|m.52303/c111174_g2_i1|m.93612/c95692_g1_i1|m.23816/c66735_g1_i1|m.7614/c105531_g2_i1|m.54784/c13355_g1_i1|m.1308/c104298_g4_i1|m.48781/c111243_g2_…	77
GO:0048455	stamen formation	37/3804	156/43701	1.48035e-08	4.34236e-07	3.8619e-07	c98004_g5_i1|m.28465/c13355_g1_i1|m.1308/c109916_g2_i6|m.82935/c109916_g2_i2|m.82923/c109916_g2_i3|m.82928/c107529_g3_i1|m.66181/c101109_g1_i1|m.36687/c124232_g1_i1|m.97076/c110767_g1_i2|m.89970/c85263_g1_i1|m.13782/c85263_g2_i1|m.13783/c81641_g1_i1|m.11915/c163295_g1_i1|m.100910/c14235_g1_i1|m.1407/c111270_g3_i8|m.94353/c100939_g1_i2|m.36240/c104117_g4_i1|m.47939/c107187_g1_i2|m.63916/c91962_g1_…	37
GO:0055075	potassium ion homeostasis	63/3804	345/43701	1.50851e-08	4.4005e-07	3.9136e-07	c110257_g2_i5|m.85658/c110257_g2_i11|m.85666/c98318_g1_i1|m.29161/c100573_g3_i1|m.35195/c109924_g1_i3|m.82988/c101515_g1_i1|m.37973/c109845_g4_i1|m.82374/c109845_g2_i1|m.82369/c108987_g2_i3|m.76192/c109696_g6_i2|m.81216/c105531_g6_i1|m.54792/c107529_g1_i1|m.66178/c105531_g5_i1|m.54791/c104298_g1_i1|m.48778/c11504_g1_i1|m.1019/c109916_g2_i4|m.82929/c109916_g2_i2|m.82923/c109916_g2_i3|m.82928/c1099…	63
GO:0001653	peptide receptor activity	22/3804	66/43701	1.84098e-08	5.34088e-07	4.74993e-07	c73376_g1_i1|m.9813/c29342_g2_i1|m.3268/c110378_g4_i1|m.86543/c108987_g2_i2|m.76190/c109916_g2_i4|m.82929/c85263_g2_i1|m.13783/c98004_g3_i1|m.28462/c91962_g1_i1|m.18805/c111270_g2_i1|m.94344/c107775_g1_i4|m.67898/c104139_g1_i1|m.48032/c107171_g1_i1|m.63835/c109076_g1_i1|m.76865/c107612_g1_i1|m.66762/c109400_g7_i1|m.79111/c111379_g2_i1|m.95222/c110996_g3_i1|m.92032/c110996_g3_i2|m.92041/c149805_g1…	22
GO:0044215	other organism	27/3804	95/43701	2.27883e-08	6.50389e-07	5.78426e-07	c18531_g1_i1|m.2009/c109691_g1_i1|m.81172/c106627_g5_i1|m.60652/c107738_g1_i4|m.67668/c93238_g3_i1|m.20049/c80585_g3_i1|m.11680/c91708_g2_i1|m.18593/c137846_g1_i1|m.98382/c90961_g1_i2|m.17881/c108152_g10_i1|m.70467/c110988_g1_i1|m.91949/c77377_g1_i1|m.10750/c59126_g1_i1|m.5767/c120581_g1_i1|m.96525/c72399_g1_i1|m.9555/c111357_g1_i2|m.95042/c134633_g1_i1|m.97840/c110914_g4_i2|m.91336/c96109_g1_i1|…	27
GO:0044216	other organism cell	27/3804	95/43701	2.27883e-08	6.50389e-07	5.78426e-07	c18531_g1_i1|m.2009/c109691_g1_i1|m.81172/c106627_g5_i1|m.60652/c107738_g1_i4|m.67668/c93238_g3_i1|m.20049/c80585_g3_i1|m.11680/c91708_g2_i1|m.18593/c137846_g1_i1|m.98382/c90961_g1_i2|m.17881/c108152_g10_i1|m.70467/c110988_g1_i1|m.91949/c77377_g1_i1|m.10750/c59126_g1_i1|m.5767/c120581_g1_i1|m.96525/c72399_g1_i1|m.9555/c111357_g1_i2|m.95042/c134633_g1_i1|m.97840/c110914_g4_i2|m.91336/c96109_g1_i1|…	27
GO:0044217	other organism part	27/3804	95/43701	2.27883e-08	6.50389e-07	5.78426e-07	c18531_g1_i1|m.2009/c109691_g1_i1|m.81172/c106627_g5_i1|m.60652/c107738_g1_i4|m.67668/c93238_g3_i1|m.20049/c80585_g3_i1|m.11680/c91708_g2_i1|m.18593/c137846_g1_i1|m.98382/c90961_g1_i2|m.17881/c108152_g10_i1|m.70467/c110988_g1_i1|m.91949/c77377_g1_i1|m.10750/c59126_g1_i1|m.5767/c120581_g1_i1|m.96525/c72399_g1_i1|m.9555/c111357_g1_i2|m.95042/c134633_g1_i1|m.97840/c110914_g4_i2|m.91336/c96109_g1_i1|…	27
GO:0048826	cotyledon morphogenesis	56/3804	295/43701	2.32998e-08	6.61415e-07	5.88232e-07	c108091_g6_i1|m.70087/c137764_g1_i1|m.98370/c106654_g9_i1|m.60803/c87097_g3_i1|m.15139/c153008_g1_i1|m.99896/c104973_g9_i1|m.51829/c108091_g2_i1|m.70079/c182109_g1_i1|m.102801/c162128_g1_i1|m.100695/c106654_g4_i1|m.60793/c106556_g3_i1|m.60196/c108091_g9_i1|m.70090/c110588_g8_i1|m.88371/c102936_g15_i1|m.42930/c103696_g7_i2|m.46222/c104973_g6_i1|m.51825/c21064_g1_i1|m.2317/c31796_g1_i1|m.3582/c9514…	56
GO:0070252	actin-mediated cell contraction	24/3804	78/43701	2.4943e-08	7.04272e-07	6.26347e-07	c101230_g2_i3|m.37065/c110875_g1_i3|m.90985/c101230_g3_i2|m.37056/c109550_g1_i7|m.80269/c110926_g1_i6|m.91441/c110926_g1_i4|m.91437/c105922_g3_i1|m.56788/c110731_g1_i6|m.89644/c107738_g1_i1|m.67664/c107738_g1_i4|m.67668/c15104_g1_i1|m.1551/c72524_g3_i1|m.9634/c36762_g1_i1|m.3884/c180099_g1_i1|m.102614/c63845_g2_i1|m.6737/c60241_g1_i1|m.5980/c24515_g1_i1|m.2633/c162075_g1_i1|m.100681/c153397_g1_i1…	24
GO:0071709	membrane assembly	20/3804	57/43701	3.01756e-08	8.47484e-07	7.53714e-07	c104914_g5_i2|m.51528/c110875_g1_i3|m.90985/c90107_g1_i1|m.17049/c101230_g3_i2|m.37056/c110408_g2_i1|m.86753/c101007_g1_i1|m.36407/c108589_g1_i1|m.73594/c110926_g1_i1|m.91432/c105922_g2_i1|m.56787/c110926_g1_i4|m.91437/c107470_g3_i2|m.65850/c105922_g3_i1|m.56788/c110926_g2_i2|m.91440/c110926_g2_i1|m.91434/c62392_g1_i1|m.6368/c110957_g10_i2|m.91664/c111005_g1_i6|m.92127/c110731_g1_i6|m.89644/c7470…	20
GO:0071367	cellular response to brassinosteroid stimulus	77/3804	464/43701	3.16173e-08	8.83277e-07	7.85546e-07	c109924_g1_i3|m.82988/c110732_g1_i2|m.89648/c109845_g2_i1|m.82369/c111169_g3_i1|m.93563/c108987_g2_i2|m.76190/c98004_g2_i1|m.28460/c109696_g6_i2|m.81216/c98004_g1_i1|m.28459/c105531_g5_i1|m.54791/c98004_g5_i1|m.28465/c111174_g2_i8|m.93634/c105064_g1_i3|m.52303/c111174_g2_i1|m.93612/c95692_g1_i1|m.23816/c66735_g1_i1|m.7614/c105531_g2_i1|m.54784/c13355_g1_i1|m.1308/c104298_g4_i1|m.48781/c111243_g2_…	77
GO:0043267	negative regulation of potassium ion transport	22/3804	68/43701	3.41347e-08	9.38704e-07	8.3484e-07	c104914_g5_i2|m.51528/c110875_g1_i3|m.90985/c90107_g1_i1|m.17049/c101230_g3_i2|m.37056/c110408_g2_i1|m.86753/c101007_g1_i1|m.36407/c108589_g1_i1|m.73594/c110926_g1_i1|m.91432/c105922_g2_i1|m.56787/c110926_g1_i4|m.91437/c107470_g3_i2|m.65850/c105922_g3_i1|m.56788/c110926_g2_i2|m.91440/c110926_g2_i1|m.91434/c62392_g1_i1|m.6368/c110957_g10_i2|m.91664/c111005_g1_i6|m.92127/c110731_g1_i6|m.89644/c7470…	22
GO:1901017	negative regulation of potassium ion transmembrane transporter activity	22/3804	68/43701	3.41347e-08	9.38704e-07	8.3484e-07	c104914_g5_i2|m.51528/c110875_g1_i3|m.90985/c90107_g1_i1|m.17049/c101230_g3_i2|m.37056/c110408_g2_i1|m.86753/c101007_g1_i1|m.36407/c108589_g1_i1|m.73594/c110926_g1_i1|m.91432/c105922_g2_i1|m.56787/c110926_g1_i4|m.91437/c107470_g3_i2|m.65850/c105922_g3_i1|m.56788/c110926_g2_i2|m.91440/c110926_g2_i1|m.91434/c62392_g1_i1|m.6368/c110957_g10_i2|m.91664/c111005_g1_i6|m.92127/c110731_g1_i6|m.89644/c7470…	22
GO:1901380	negative regulation of potassium ion transmembrane transport	22/3804	68/43701	3.41347e-08	9.38704e-07	8.3484e-07	c104914_g5_i2|m.51528/c110875_g1_i3|m.90985/c90107_g1_i1|m.17049/c101230_g3_i2|m.37056/c110408_g2_i1|m.86753/c101007_g1_i1|m.36407/c108589_g1_i1|m.73594/c110926_g1_i1|m.91432/c105922_g2_i1|m.56787/c110926_g1_i4|m.91437/c107470_g3_i2|m.65850/c105922_g3_i1|m.56788/c110926_g2_i2|m.91440/c110926_g2_i1|m.91434/c62392_g1_i1|m.6368/c110957_g10_i2|m.91664/c111005_g1_i6|m.92127/c110731_g1_i6|m.89644/c7470…	22
GO:0044409	entry into host	29/3804	109/43701	3.54019e-08	9.68508e-07	8.61346e-07	c106627_g5_i1|m.60652/c93238_g3_i1|m.20049/c181763_g1_i1|m.102764/c80585_g3_i1|m.11680/c91708_g2_i1|m.18593/c110234_g7_i1|m.85469/c137846_g1_i1|m.98382/c90961_g1_i2|m.17881/c106981_g2_i2|m.62738/c51404_g1_i1|m.5408/c110988_g1_i1|m.91949/c77377_g1_i1|m.10750/c59126_g1_i1|m.5767/c100255_g3_i1|m.34346/c120581_g1_i1|m.96525/c97949_g1_i2|m.28359/c110914_g4_i2|m.91336/c96109_g1_i1|m.24532/c99963_g5_i1|…	29
GO:1901016	regulation of potassium ion transmembrane transporter activity	27/3804	97/43701	3.69689e-08	1.00616e-06	8.94835e-07	c101230_g2_i3|m.37065/c104914_g5_i2|m.51528/c110875_g1_i3|m.90985/c90107_g1_i1|m.17049/c101230_g3_i2|m.37056/c110408_g2_i1|m.86753/c109550_g1_i7|m.80269/c101007_g1_i1|m.36407/c108589_g1_i1|m.73594/c110926_g1_i1|m.91432/c105922_g2_i1|m.56787/c110926_g1_i6|m.91441/c110926_g1_i4|m.91437/c107470_g3_i2|m.65850/c105922_g3_i1|m.56788/c110926_g2_i2|m.91440/c110926_g2_i1|m.91434/c62392_g1_i1|m.6368/c11095…	27
GO:0050502	cis-zeatin O-beta-D-glucosyltransferase activity	29/3804	110/43701	4.40939e-08	1.19393e-06	1.06182e-06	c104537_g1_i2|m.49789/c104843_g2_i1|m.51191/c104843_g3_i1|m.51196/c77782_g1_i2|m.10898/c104843_g1_i1|m.51190/c106277_g1_i1|m.58707/c106277_g1_i2|m.58708/c111109_g1_i4|m.93081/c106552_g1_i3|m.60172/c106552_g1_i6|m.60178/c106552_g1_i8|m.60181/c104273_g3_i1|m.48661/c104273_g3_i3|m.48668/c106341_g1_i1|m.59031/c106341_g1_i2|m.59033/c106523_g1_i1|m.60018/c106523_g2_i1|m.60020/c106523_g4_i1|m.60022/c106…	29
GO:0048654	anther morphogenesis	37/3804	163/43701	5.0757e-08	1.36039e-06	1.20987e-06	c98004_g5_i1|m.28465/c13355_g1_i1|m.1308/c109916_g2_i6|m.82935/c109916_g2_i2|m.82923/c109916_g2_i3|m.82928/c107529_g3_i1|m.66181/c101109_g1_i1|m.36687/c124232_g1_i1|m.97076/c110767_g1_i2|m.89970/c85263_g1_i1|m.13782/c85263_g2_i1|m.13783/c81641_g1_i1|m.11915/c163295_g1_i1|m.100910/c14235_g1_i1|m.1407/c111270_g3_i8|m.94353/c100939_g1_i2|m.36240/c104117_g4_i1|m.47939/c107187_g1_i2|m.63916/c91962_g1_…	37
GO:0048655	anther wall tapetum morphogenesis	37/3804	163/43701	5.0757e-08	1.36039e-06	1.20987e-06	c98004_g5_i1|m.28465/c13355_g1_i1|m.1308/c109916_g2_i6|m.82935/c109916_g2_i2|m.82923/c109916_g2_i3|m.82928/c107529_g3_i1|m.66181/c101109_g1_i1|m.36687/c124232_g1_i1|m.97076/c110767_g1_i2|m.89970/c85263_g1_i1|m.13782/c85263_g2_i1|m.13783/c81641_g1_i1|m.11915/c163295_g1_i1|m.100910/c14235_g1_i1|m.1407/c111270_g3_i8|m.94353/c100939_g1_i2|m.36240/c104117_g4_i1|m.47939/c107187_g1_i2|m.63916/c91962_g1_…	37
GO:0032413	negative regulation of ion transmembrane transporter activity	25/3804	87/43701	5.87012e-08	1.56537e-06	1.39216e-06	c104914_g5_i2|m.51528/c110875_g1_i3|m.90985/c90107_g1_i1|m.17049/c101230_g3_i2|m.37056/c110408_g2_i1|m.86753/c101007_g1_i1|m.36407/c108589_g1_i1|m.73594/c110926_g1_i1|m.91432/c105922_g2_i1|m.56787/c110926_g1_i4|m.91437/c107470_g3_i2|m.65850/c105922_g3_i1|m.56788/c110926_g2_i2|m.91440/c110926_g2_i1|m.91434/c62392_g1_i1|m.6368/c110957_g10_i2|m.91664/c111005_g1_i6|m.92127/c110731_g1_i6|m.89644/c7470…	25
GO:1901378	organic heteropentacyclic compound biosynthetic process	24/3804	82/43701	7.2908e-08	1.93444e-06	1.72041e-06	c103825_g1_i1|m.46711/c77916_g1_i1|m.10959/c78819_g3_i1|m.11237/c102046_g1_i1|m.39705/c103790_g1_i1|m.46606/c93405_g1_i1|m.20222/c93324_g1_i1|m.20136/c29263_g1_i1|m.3235/c148853_g1_i1|m.99390/c175676_g1_i1|m.102054/c65162_g1_i1|m.7023/c107214_g1_i14|m.64166/c107214_g1_i8|m.64161/c107214_g1_i7|m.64160/c109635_g8_i1|m.80826/c107530_g1_i11|m.66203/c89265_g1_i1|m.16247/c107530_g1_i8|m.66198/c10575_g1…	24
GO:0032410	negative regulation of transporter activity	25/3804	88/43701	7.52345e-08	1.98619e-06	1.76643e-06	c104914_g5_i2|m.51528/c110875_g1_i3|m.90985/c90107_g1_i1|m.17049/c101230_g3_i2|m.37056/c110408_g2_i1|m.86753/c101007_g1_i1|m.36407/c108589_g1_i1|m.73594/c110926_g1_i1|m.91432/c105922_g2_i1|m.56787/c110926_g1_i4|m.91437/c107470_g3_i2|m.65850/c105922_g3_i1|m.56788/c110926_g2_i2|m.91440/c110926_g2_i1|m.91434/c62392_g1_i1|m.6368/c110957_g10_i2|m.91664/c111005_g1_i6|m.92127/c110731_g1_i6|m.89644/c7470…	25
GO:0048658	anther wall tapetum development	41/3804	194/43701	8.33882e-08	2.1905e-06	1.94813e-06	c98004_g5_i1|m.28465/c13355_g1_i1|m.1308/c109916_g2_i6|m.82935/c109916_g2_i2|m.82923/c109916_g2_i3|m.82928/c107529_g3_i1|m.66181/c101109_g1_i1|m.36687/c111243_g2_i2|m.94170/c124232_g1_i1|m.97076/c110767_g1_i2|m.89970/c85263_g1_i1|m.13782/c85263_g2_i1|m.13783/c81641_g1_i1|m.11915/c163295_g1_i1|m.100910/c14235_g1_i1|m.1407/c111270_g3_i8|m.94353/c100939_g1_i2|m.36240/c104117_g4_i1|m.47939/c107187_g1…	41
GO:0033647	host intracellular organelle	16/3804	40/43701	8.6637e-08	2.25342e-06	2.00408e-06	c106627_g5_i1|m.60652/c93238_g3_i1|m.20049/c80585_g3_i1|m.11680/c91708_g2_i1|m.18593/c137846_g1_i1|m.98382/c90961_g1_i2|m.17881/c77377_g1_i1|m.10750/c59126_g1_i1|m.5767/c120581_g1_i1|m.96525/c110914_g4_i2|m.91336/c8649_g1_i1|m.697/c112289_g1_i1|m.95753/c102062_g2_i2|m.39768/c90280_g2_i1|m.17213/c110093_g2_i2|m.84318/c116718_g1_i1|m.96204	16
GO:0033648	host intracellular membrane-bounded organelle	16/3804	40/43701	8.6637e-08	2.25342e-06	2.00408e-06	c106627_g5_i1|m.60652/c93238_g3_i1|m.20049/c80585_g3_i1|m.11680/c91708_g2_i1|m.18593/c137846_g1_i1|m.98382/c90961_g1_i2|m.17881/c77377_g1_i1|m.10750/c59126_g1_i1|m.5767/c120581_g1_i1|m.96525/c110914_g4_i2|m.91336/c8649_g1_i1|m.697/c112289_g1_i1|m.95753/c102062_g2_i2|m.39768/c90280_g2_i1|m.17213/c110093_g2_i2|m.84318/c116718_g1_i1|m.96204	16
GO:0051899	membrane depolarization	23/3804	77/43701	8.9474e-08	2.3158e-06	2.05956e-06	c101230_g2_i3|m.37065/c104914_g5_i2|m.51528/c110875_g1_i3|m.90985/c90107_g1_i1|m.17049/c101230_g3_i2|m.37056/c110408_g2_i1|m.86753/c109550_g1_i7|m.80269/c101007_g1_i1|m.36407/c108589_g1_i1|m.73594/c110926_g1_i1|m.91432/c105922_g2_i1|m.56787/c110926_g1_i4|m.91437/c107470_g3_i2|m.65850/c105922_g3_i1|m.56788/c110926_g2_i2|m.91440/c110926_g2_i1|m.91434/c62392_g1_i1|m.6368/c110957_g10_i2|m.91664/c1110…	23
GO:0004383	guanylate cyclase activity	20/3804	61/43701	1.10519e-07	2.84655e-06	2.53159e-06	c110378_g4_i1|m.86543/c108987_g2_i2|m.76190/c85263_g2_i1|m.13783/c91962_g1_i1|m.18805/c111270_g2_i1|m.94344/c107775_g1_i4|m.67898/c107171_g1_i1|m.63835/c104573_g5_i3|m.49951/c105019_g1_i1|m.52026/c109042_g1_i1|m.76677/c109076_g1_i1|m.76865/c107612_g1_i1|m.66762/c109400_g7_i1|m.79111/c111379_g2_i1|m.95222/c110996_g3_i1|m.92032/c110996_g3_i2|m.92041/c149805_g1_i1|m.99540/c94344_g1_i1|m.21469/c86683…	20
GO:0001508	action potential	26/3804	96/43701	1.20096e-07	3.06333e-06	2.72438e-06	c101230_g2_i3|m.37065/c104914_g5_i2|m.51528/c110875_g1_i3|m.90985/c90107_g1_i1|m.17049/c101230_g3_i2|m.37056/c110408_g2_i1|m.86753/c109550_g1_i7|m.80269/c101007_g1_i1|m.36407/c108589_g1_i1|m.73594/c110926_g1_i1|m.91432/c105922_g2_i1|m.56787/c110926_g1_i6|m.91441/c110926_g1_i4|m.91437/c107470_g3_i2|m.65850/c105922_g3_i1|m.56788/c110926_g2_i2|m.91440/c110926_g2_i1|m.91434/c62392_g1_i1|m.6368/c11095…	26
GO:0032414	positive regulation of ion transmembrane transporter activity	26/3804	96/43701	1.20096e-07	3.06333e-06	2.72438e-06	c101230_g2_i3|m.37065/c104914_g5_i2|m.51528/c110875_g1_i3|m.90985/c90107_g1_i1|m.17049/c101230_g3_i2|m.37056/c110408_g2_i1|m.86753/c109550_g1_i7|m.80269/c101007_g1_i1|m.36407/c108589_g1_i1|m.73594/c110926_g1_i1|m.91432/c105922_g2_i1|m.56787/c110926_g1_i6|m.91441/c110926_g1_i4|m.91437/c107470_g3_i2|m.65850/c105922_g3_i1|m.56788/c110926_g2_i2|m.91440/c110926_g2_i1|m.91434/c62392_g1_i1|m.6368/c11095…	26
GO:0033643	host cell part	24/3804	84/43701	1.20923e-07	3.06957e-06	2.72994e-06	c106627_g5_i1|m.60652/c93238_g3_i1|m.20049/c80585_g3_i1|m.11680/c91708_g2_i1|m.18593/c137846_g1_i1|m.98382/c90961_g1_i2|m.17881/c108152_g10_i1|m.70467/c110988_g1_i1|m.91949/c77377_g1_i1|m.10750/c59126_g1_i1|m.5767/c120581_g1_i1|m.96525/c72399_g1_i1|m.9555/c111357_g1_i2|m.95042/c134633_g1_i1|m.97840/c110914_g4_i2|m.91336/c96109_g1_i1|m.24532/c99963_g5_i1|m.33435/c8649_g1_i1|m.697/c112289_g1_i1|m.9…	24
GO:0017046	peptide hormone binding	21/3804	67/43701	1.28698e-07	3.25132e-06	2.89158e-06	c110767_g1_i2|m.89970/c85263_g1_i1|m.13782/c100651_g1_i2|m.35407/c100939_g1_i1|m.36239/c100939_g1_i2|m.36240/c109950_g2_i5|m.83198/c109950_g2_i1|m.83191/c109950_g2_i2|m.83192/c105380_g1_i1|m.54055/c110744_g4_i1|m.89747/c110053_g4_i1|m.84022/c110053_g5_i1|m.84024/c91215_g2_i1|m.18153/c95597_g2_i1|m.23587/c85577_g1_i1|m.13914/c109950_g1_i1|m.83190/c109950_g6_i1|m.83205/c109950_g4_i1|m.83195/c109950…	21
GO:0003012	muscle system process	37/3804	169/43701	1.361e-07	3.42194e-06	3.04332e-06	c101230_g2_i3|m.37065/c110875_g1_i3|m.90985/c101230_g3_i2|m.37056/c109550_g1_i7|m.80269/c110926_g1_i6|m.91441/c110926_g1_i4|m.91437/c105922_g3_i1|m.56788/c154994_g1_i1|m.100054/c111174_g4_i2|m.93623/c110731_g1_i6|m.89644/c107738_g1_i1|m.67664/c107738_g1_i4|m.67668/c35192_g2_i1|m.3753/c15104_g1_i1|m.1551/c72524_g3_i1|m.9634/c8278_g1_i2|m.642/c36762_g1_i1|m.3884/c180099_g1_i1|m.102614/c63845_g2_i1|…	37
GO:0006941	striated muscle contraction	25/3804	91/43701	1.54305e-07	3.84306e-06	3.41784e-06	c101230_g2_i3|m.37065/c110875_g1_i3|m.90985/c101230_g3_i2|m.37056/c109550_g1_i7|m.80269/c110926_g1_i6|m.91441/c110926_g1_i4|m.91437/c105922_g3_i1|m.56788/c110731_g1_i6|m.89644/c107738_g1_i1|m.67664/c107738_g1_i4|m.67668/c72524_g3_i1|m.9634/c36762_g1_i1|m.3884/c60241_g1_i1|m.5980/c24515_g1_i1|m.2633/c162075_g1_i1|m.100681/c140384_g1_i1|m.98628/c41934_g1_i1|m.4629/c153397_g1_i1|m.99927/c8633_g1_i1|…	25
GO:0035637	multicellular organismal signaling	25/3804	91/43701	1.54305e-07	3.84306e-06	3.41784e-06	c101230_g2_i3|m.37065/c110875_g1_i3|m.90985/c90107_g1_i1|m.17049/c101230_g3_i2|m.37056/c110408_g2_i1|m.86753/c109550_g1_i7|m.80269/c101007_g1_i1|m.36407/c108589_g1_i1|m.73594/c110926_g1_i1|m.91432/c105922_g2_i1|m.56787/c110926_g1_i6|m.91441/c110926_g1_i4|m.91437/c105922_g3_i1|m.56788/c110926_g2_i2|m.91440/c110926_g2_i1|m.91434/c62392_g1_i1|m.6368/c110957_g10_i2|m.91664/c110731_g1_i6|m.89644/c1077…	25
GO:0030155	regulation of cell adhesion	53/3804	288/43701	1.55382e-07	3.85172e-06	3.42555e-06	c104914_g5_i2|m.51528/c110875_g1_i3|m.90985/c90107_g1_i1|m.17049/c101230_g3_i2|m.37056/c110408_g2_i1|m.86753/c101007_g1_i1|m.36407/c108589_g1_i1|m.73594/c110926_g1_i1|m.91432/c105922_g2_i1|m.56787/c110926_g1_i4|m.91437/c107470_g3_i2|m.65850/c105922_g3_i1|m.56788/c110926_g2_i2|m.91440/c110926_g2_i1|m.91434/c62392_g1_i1|m.6368/c110957_g10_i2|m.91664/c111005_g1_i6|m.92127/c110731_g1_i6|m.89644/c1233…	53
GO:0048448	stamen morphogenesis	38/3804	177/43701	1.58935e-07	3.92138e-06	3.4875e-06	c98004_g5_i1|m.28465/c13355_g1_i1|m.1308/c109916_g2_i6|m.82935/c109916_g2_i2|m.82923/c109916_g2_i3|m.82928/c107529_g3_i1|m.66181/c101109_g1_i1|m.36687/c124232_g1_i1|m.97076/c110767_g1_i2|m.89970/c85263_g1_i1|m.13782/c85263_g2_i1|m.13783/c81641_g1_i1|m.11915/c163295_g1_i1|m.100910/c14235_g1_i1|m.1407/c111270_g3_i8|m.94353/c100939_g1_i2|m.36240/c104117_g4_i1|m.47939/c107187_g1_i2|m.63916/c91962_g1_…	38
GO:0080046	quercetin 4'-O-glucosyltransferase activity	15/3804	37/43701	1.7764e-07	4.3625e-06	3.8798e-06	c106277_g1_i1|m.58707/c106277_g1_i2|m.58708/c111109_g1_i4|m.93081/c106552_g1_i3|m.60172/c106552_g1_i6|m.60178/c106552_g1_i8|m.60181/c106171_g4_i4|m.57978/c106171_g6_i1|m.57979/c106341_g1_i2|m.59033/c106523_g1_i1|m.60018/c106523_g2_i1|m.60020/c122388_g1_i1|m.96868/c109521_g1_i3|m.79956/c98717_g2_i1|m.30169/c98717_g2_i2|m.30171	15
GO:0010120	camalexin biosynthetic process	26/3804	98/43701	1.87995e-07	4.57425e-06	4.06813e-06	c108175_g4_i1|m.70621/c105245_g12_i1|m.53306/c107464_g5_i1|m.65802/c75972_g1_i1|m.10328/c107464_g7_i1|m.65807/c107464_g2_i1|m.65801/c109563_g2_i1|m.80388/c109774_g1_i8|m.81825/c109774_g1_i1|m.81817/c109774_g1_i10|m.81827/c109563_g2_i11|m.80402/c109563_g2_i10|m.80401/c109563_g2_i4|m.80393/c106807_g1_i1|m.61726/c107361_g1_i3|m.65119/c108175_g4_i4|m.70624/c109214_g2_i3|m.77806/c109214_g5_i1|m.77807/…	26
GO:0052317	camalexin metabolic process	26/3804	98/43701	1.87995e-07	4.57425e-06	4.06813e-06	c108175_g4_i1|m.70621/c105245_g12_i1|m.53306/c107464_g5_i1|m.65802/c75972_g1_i1|m.10328/c107464_g7_i1|m.65807/c107464_g2_i1|m.65801/c109563_g2_i1|m.80388/c109774_g1_i8|m.81825/c109774_g1_i1|m.81817/c109774_g1_i10|m.81827/c109563_g2_i11|m.80402/c109563_g2_i10|m.80401/c109563_g2_i4|m.80393/c106807_g1_i1|m.61726/c107361_g1_i3|m.65119/c108175_g4_i4|m.70624/c109214_g2_i3|m.77806/c109214_g5_i1|m.77807/…	26
GO:0005496	steroid binding	31/3804	131/43701	2.2248e-07	5.38852e-06	4.7923e-06	c98004_g5_i1|m.28465/c95692_g1_i1|m.23816/c66735_g1_i1|m.7614/c105531_g2_i1|m.54784/c13355_g1_i1|m.1308/c104298_g1_i1|m.48778/c109916_g2_i6|m.82935/c109916_g2_i2|m.82923/c109916_g2_i3|m.82928/c107529_g3_i1|m.66181/c101109_g1_i1|m.36687/c85263_g1_i1|m.13782/c85263_g2_i1|m.13783/c81641_g1_i1|m.11915/c100939_g1_i2|m.36240/c107187_g1_i2|m.63916/c91962_g1_i1|m.18805/c61851_g2_i1|m.6188/c100573_g1_i1|m…	31
GO:0009700	indole phytoalexin biosynthetic process	26/3804	99/43701	2.33923e-07	5.61416e-06	4.99298e-06	c108175_g4_i1|m.70621/c105245_g12_i1|m.53306/c107464_g5_i1|m.65802/c75972_g1_i1|m.10328/c107464_g7_i1|m.65807/c107464_g2_i1|m.65801/c109563_g2_i1|m.80388/c109774_g1_i8|m.81825/c109774_g1_i1|m.81817/c109774_g1_i10|m.81827/c109563_g2_i11|m.80402/c109563_g2_i10|m.80401/c109563_g2_i4|m.80393/c106807_g1_i1|m.61726/c107361_g1_i3|m.65119/c108175_g4_i4|m.70624/c109214_g2_i3|m.77806/c109214_g5_i1|m.77807/…	26
GO:0046217	indole phytoalexin metabolic process	26/3804	99/43701	2.33923e-07	5.61416e-06	4.99298e-06	c108175_g4_i1|m.70621/c105245_g12_i1|m.53306/c107464_g5_i1|m.65802/c75972_g1_i1|m.10328/c107464_g7_i1|m.65807/c107464_g2_i1|m.65801/c109563_g2_i1|m.80388/c109774_g1_i8|m.81825/c109774_g1_i1|m.81817/c109774_g1_i10|m.81827/c109563_g2_i11|m.80402/c109563_g2_i10|m.80401/c109563_g2_i4|m.80393/c106807_g1_i1|m.61726/c107361_g1_i3|m.65119/c108175_g4_i4|m.70624/c109214_g2_i3|m.77806/c109214_g5_i1|m.77807/…	26
GO:1904063	negative regulation of cation transmembrane transport	23/3804	81/43701	2.48987e-07	5.94866e-06	5.29046e-06	c104914_g5_i2|m.51528/c110875_g1_i3|m.90985/c90107_g1_i1|m.17049/c101230_g3_i2|m.37056/c110408_g2_i1|m.86753/c101007_g1_i1|m.36407/c108589_g1_i1|m.73594/c110926_g1_i1|m.91432/c105922_g2_i1|m.56787/c110926_g1_i4|m.91437/c107470_g3_i2|m.65850/c105922_g3_i1|m.56788/c110926_g2_i2|m.91440/c110926_g2_i1|m.91434/c62392_g1_i1|m.6368/c110957_g10_i2|m.91664/c111005_g1_i6|m.92127/c110731_g1_i6|m.89644/c7470…	23
GO:0031430	M band	26/3804	100/43701	2.90044e-07	6.89835e-06	6.13507e-06	c101230_g2_i3|m.37065/c110875_g1_i3|m.90985/c90107_g1_i1|m.17049/c101230_g3_i2|m.37056/c109550_g1_i7|m.80269/c110926_g1_i6|m.91441/c110926_g1_i4|m.91437/c105922_g3_i1|m.56788/c110926_g2_i2|m.91440/c110926_g2_i1|m.91434/c62392_g1_i1|m.6368/c154994_g1_i1|m.100054/c110731_g1_i3|m.89639/c110731_g1_i4|m.89640/c110731_g1_i6|m.89644/c107738_g1_i1|m.67664/c107738_g1_i4|m.67668/c33420_g1_i1|m.3683/c107470…	26
GO:0036379	myofilament	12/3804	25/43701	3.28226e-07	7.77145e-06	6.91157e-06	c8278_g1_i2|m.642/c180099_g1_i1|m.102614/c63845_g2_i1|m.6737/c127519_g1_i1|m.97395/c152080_g1_i1|m.99794/c162075_g1_i1|m.100681/c153397_g1_i1|m.99927/c8633_g1_i1|m.695/c131658_g1_i1|m.97629/c153413_g1_i1|m.99932/c174246_g1_i1|m.101760/c41491_g2_i1|m.4550	12
GO:0010353	response to trehalose	20/3804	65/43701	3.57072e-07	8.37929e-06	7.45215e-06	c108175_g4_i1|m.70621/c105245_g12_i1|m.53306/c107464_g5_i1|m.65802/c75972_g1_i1|m.10328/c107464_g7_i1|m.65807/c107464_g2_i1|m.65801/c109563_g2_i1|m.80388/c109774_g1_i8|m.81825/c109774_g1_i1|m.81817/c109774_g1_i10|m.81827/c109563_g2_i11|m.80402/c109563_g2_i10|m.80401/c109563_g2_i4|m.80393/c106807_g1_i1|m.61726/c107361_g1_i3|m.65119/c108175_g4_i4|m.70624/c109214_g2_i3|m.77806/c109214_g5_i1|m.77807/…	20
GO:0071327	cellular response to trehalose stimulus	20/3804	65/43701	3.57072e-07	8.37929e-06	7.45215e-06	c108175_g4_i1|m.70621/c105245_g12_i1|m.53306/c107464_g5_i1|m.65802/c75972_g1_i1|m.10328/c107464_g7_i1|m.65807/c107464_g2_i1|m.65801/c109563_g2_i1|m.80388/c109774_g1_i8|m.81825/c109774_g1_i1|m.81817/c109774_g1_i10|m.81827/c109563_g2_i11|m.80402/c109563_g2_i10|m.80401/c109563_g2_i4|m.80393/c106807_g1_i1|m.61726/c107361_g1_i3|m.65119/c108175_g4_i4|m.70624/c109214_g2_i3|m.77806/c109214_g5_i1|m.77807/…	20
GO:0030049	muscle filament sliding	14/3804	34/43701	3.63158e-07	8.44702e-06	7.51239e-06	c15104_g1_i1|m.1551/c72524_g3_i1|m.9634/c36762_g1_i1|m.3884/c180099_g1_i1|m.102614/c63845_g2_i1|m.6737/c60241_g1_i1|m.5980/c24515_g1_i1|m.2633/c162075_g1_i1|m.100681/c153397_g1_i1|m.99927/c8633_g1_i1|m.695/c131658_g1_i1|m.97629/c153413_g1_i1|m.99932/c174246_g1_i1|m.101760/c41491_g2_i1|m.4550	14
GO:0099612	protein localization to axon	14/3804	34/43701	3.63158e-07	8.44702e-06	7.51239e-06	c110875_g1_i3|m.90985/c90107_g1_i1|m.17049/c101230_g3_i2|m.37056/c101007_g1_i1|m.36407/c108589_g1_i1|m.73594/c110926_g1_i1|m.91432/c105922_g2_i1|m.56787/c110926_g1_i4|m.91437/c110926_g2_i2|m.91440/c110926_g2_i1|m.91434/c62392_g1_i1|m.6368/c110731_g1_i6|m.89644/c74702_g2_i1|m.9996/c110266_g5_i1|m.85714	14
GO:0034763	negative regulation of transmembrane transport	25/3804	95/43701	3.79876e-07	8.75872e-06	7.78961e-06	c104914_g5_i2|m.51528/c110875_g1_i3|m.90985/c90107_g1_i1|m.17049/c101230_g3_i2|m.37056/c110408_g2_i1|m.86753/c101007_g1_i1|m.36407/c108589_g1_i1|m.73594/c110926_g1_i1|m.91432/c105922_g2_i1|m.56787/c110926_g1_i4|m.91437/c107470_g3_i2|m.65850/c105922_g3_i1|m.56788/c110926_g2_i2|m.91440/c110926_g2_i1|m.91434/c62392_g1_i1|m.6368/c110957_g10_i2|m.91664/c111005_g1_i6|m.92127/c110731_g1_i6|m.89644/c7470…	25
GO:0034766	negative regulation of ion transmembrane transport	25/3804	95/43701	3.79876e-07	8.75872e-06	7.78961e-06	c104914_g5_i2|m.51528/c110875_g1_i3|m.90985/c90107_g1_i1|m.17049/c101230_g3_i2|m.37056/c110408_g2_i1|m.86753/c101007_g1_i1|m.36407/c108589_g1_i1|m.73594/c110926_g1_i1|m.91432/c105922_g2_i1|m.56787/c110926_g1_i4|m.91437/c107470_g3_i2|m.65850/c105922_g3_i1|m.56788/c110926_g2_i2|m.91440/c110926_g2_i1|m.91434/c62392_g1_i1|m.6368/c110957_g10_i2|m.91664/c111005_g1_i6|m.92127/c110731_g1_i6|m.89644/c7470…	25
GO:0008093	cytoskeletal adaptor activity	15/3804	39/43701	4.031e-07	9.25378e-06	8.22988e-06	c101230_g2_i3|m.37065/c110875_g1_i3|m.90985/c90107_g1_i1|m.17049/c107470_g3_i6|m.65857/c110926_g2_i2|m.91440/c110926_g2_i1|m.91434/c62392_g1_i1|m.6368/c110731_g1_i3|m.89639/c110731_g1_i4|m.89640/c107738_g1_i1|m.67664/c107738_g1_i4|m.67668/c33420_g1_i1|m.3683/c107470_g3_i1|m.65849/c74702_g2_i1|m.9996/c110266_g5_i1|m.85714	15
GO:2000071	regulation of defense response by callose deposition	20/3804	66/43701	4.70475e-07	1.07537e-05	9.56386e-06	c105120_g2_i1|m.52641/c107987_g4_i1|m.69426/c106293_g4_i2|m.58763/c105120_g3_i1|m.52643/c111240_g1_i5|m.94161/c103197_g4_i1|m.43950/c105881_g10_i1|m.56566/c105881_g8_i1|m.56561/c106764_g1_i6|m.61458/c106346_g1_i2|m.59052/c110002_g1_i1|m.83590/c109777_g9_i2|m.81848/c110783_g4_i1|m.90165/c109777_g7_i1|m.81845/c96394_g7_i1|m.24975/c110315_g1_i2|m.86099/c106764_g1_i1|m.61447/c104296_g1_i1|m.48766/c10…	20
GO:0032411	positive regulation of transporter activity	26/3804	103/43701	5.4171e-07	1.23286e-05	1.09645e-05	c101230_g2_i3|m.37065/c104914_g5_i2|m.51528/c110875_g1_i3|m.90985/c90107_g1_i1|m.17049/c101230_g3_i2|m.37056/c110408_g2_i1|m.86753/c109550_g1_i7|m.80269/c101007_g1_i1|m.36407/c108589_g1_i1|m.73594/c110926_g1_i1|m.91432/c105922_g2_i1|m.56787/c110926_g1_i6|m.91441/c110926_g1_i4|m.91437/c107470_g3_i2|m.65850/c105922_g3_i1|m.56788/c110926_g2_i2|m.91440/c110926_g2_i1|m.91434/c62392_g1_i1|m.6368/c11095…	26
GO:0019028	viral capsid	14/3804	35/43701	5.56658e-07	1.24015e-05	1.10293e-05	c106627_g5_i1|m.60652/c104026_g1_i1|m.47567/c137846_g1_i1|m.98382/c90961_g1_i2|m.17881/c108152_g10_i1|m.70467/c110988_g1_i1|m.91949/c72399_g1_i1|m.9555/c111357_g1_i2|m.95042/c134633_g1_i1|m.97840/c97949_g1_i2|m.28359/c96109_g1_i1|m.24532/c99963_g5_i1|m.33435/c110093_g2_i2|m.84318/c39106_g1_i1|m.4099	14
GO:0030673	axolemma	14/3804	35/43701	5.56658e-07	1.24015e-05	1.10293e-05	c101230_g2_i3|m.37065/c110875_g1_i3|m.90985/c90107_g1_i1|m.17049/c110926_g2_i2|m.91440/c110926_g2_i1|m.91434/c62392_g1_i1|m.6368/c110731_g1_i3|m.89639/c110731_g1_i4|m.89640/c107738_g1_i1|m.67664/c107738_g1_i4|m.67668/c33420_g1_i1|m.3683/c107470_g3_i1|m.65849/c74702_g2_i1|m.9996/c110266_g5_i1|m.85714	14
GO:0032589	neuron projection membrane	14/3804	35/43701	5.56658e-07	1.24015e-05	1.10293e-05	c101230_g2_i3|m.37065/c110875_g1_i3|m.90985/c90107_g1_i1|m.17049/c110926_g2_i2|m.91440/c110926_g2_i1|m.91434/c62392_g1_i1|m.6368/c110731_g1_i3|m.89639/c110731_g1_i4|m.89640/c107738_g1_i1|m.67664/c107738_g1_i4|m.67668/c33420_g1_i1|m.3683/c107470_g3_i1|m.65849/c74702_g2_i1|m.9996/c110266_g5_i1|m.85714	14
GO:0033270	paranode region of axon	14/3804	35/43701	5.56658e-07	1.24015e-05	1.10293e-05	c110875_g1_i3|m.90985/c90107_g1_i1|m.17049/c101230_g3_i2|m.37056/c101007_g1_i1|m.36407/c108589_g1_i1|m.73594/c110926_g1_i1|m.91432/c105922_g2_i1|m.56787/c110926_g1_i4|m.91437/c110926_g2_i2|m.91440/c110926_g2_i1|m.91434/c62392_g1_i1|m.6368/c110731_g1_i6|m.89644/c74702_g2_i1|m.9996/c110266_g5_i1|m.85714	14
GO:0033275	actin-myosin filament sliding	14/3804	35/43701	5.56658e-07	1.24015e-05	1.10293e-05	c15104_g1_i1|m.1551/c72524_g3_i1|m.9634/c36762_g1_i1|m.3884/c180099_g1_i1|m.102614/c63845_g2_i1|m.6737/c60241_g1_i1|m.5980/c24515_g1_i1|m.2633/c162075_g1_i1|m.100681/c153397_g1_i1|m.99927/c8633_g1_i1|m.695/c131658_g1_i1|m.97629/c153413_g1_i1|m.99932/c174246_g1_i1|m.101760/c41491_g2_i1|m.4550	14
GO:0005865	striated muscle thin filament	10/3804	18/43701	5.60903e-07	1.24436e-05	1.10667e-05	c180099_g1_i1|m.102614/c63845_g2_i1|m.6737/c127519_g1_i1|m.97395/c152080_g1_i1|m.99794/c162075_g1_i1|m.100681/c153397_g1_i1|m.99927/c8633_g1_i1|m.695/c131658_g1_i1|m.97629/c174246_g1_i1|m.101760/c41491_g2_i1|m.4550	10
GO:0006942	regulation of striated muscle contraction	20/3804	67/43701	6.15912e-07	1.35211e-05	1.20251e-05	c101230_g2_i3|m.37065/c110875_g1_i3|m.90985/c101230_g3_i2|m.37056/c109550_g1_i7|m.80269/c110926_g1_i6|m.91441/c110926_g1_i4|m.91437/c105922_g3_i1|m.56788/c110731_g1_i6|m.89644/c107738_g1_i1|m.67664/c107738_g1_i4|m.67668/c72524_g3_i1|m.9634/c60241_g1_i1|m.5980/c24515_g1_i1|m.2633/c162075_g1_i1|m.100681/c140384_g1_i1|m.98628/c41934_g1_i1|m.4629/c2238_g2_i1|m.119/c69874_g1_i1|m.8364/c153413_g1_i1|m.…	20
GO:0018995	host	24/3804	91/43701	6.17158e-07	1.35211e-05	1.20251e-05	c106627_g5_i1|m.60652/c93238_g3_i1|m.20049/c80585_g3_i1|m.11680/c91708_g2_i1|m.18593/c137846_g1_i1|m.98382/c90961_g1_i2|m.17881/c108152_g10_i1|m.70467/c110988_g1_i1|m.91949/c77377_g1_i1|m.10750/c59126_g1_i1|m.5767/c120581_g1_i1|m.96525/c72399_g1_i1|m.9555/c111357_g1_i2|m.95042/c134633_g1_i1|m.97840/c110914_g4_i2|m.91336/c96109_g1_i1|m.24532/c99963_g5_i1|m.33435/c8649_g1_i1|m.697/c112289_g1_i1|m.9…	24
GO:0043657	host cell	24/3804	91/43701	6.17158e-07	1.35211e-05	1.20251e-05	c106627_g5_i1|m.60652/c93238_g3_i1|m.20049/c80585_g3_i1|m.11680/c91708_g2_i1|m.18593/c137846_g1_i1|m.98382/c90961_g1_i2|m.17881/c108152_g10_i1|m.70467/c110988_g1_i1|m.91949/c77377_g1_i1|m.10750/c59126_g1_i1|m.5767/c120581_g1_i1|m.96525/c72399_g1_i1|m.9555/c111357_g1_i2|m.95042/c134633_g1_i1|m.97840/c110914_g4_i2|m.91336/c96109_g1_i1|m.24532/c99963_g5_i1|m.33435/c8649_g1_i1|m.697/c112289_g1_i1|m.9…	24
GO:0006937	regulation of muscle contraction	25/3804	98/43701	7.17928e-07	1.56639e-05	1.39307e-05	c101230_g2_i3|m.37065/c110875_g1_i3|m.90985/c101230_g3_i2|m.37056/c109550_g1_i7|m.80269/c110926_g1_i6|m.91441/c110926_g1_i4|m.91437/c105922_g3_i1|m.56788/c154994_g1_i1|m.100054/c110731_g1_i6|m.89644/c107738_g1_i1|m.67664/c107738_g1_i4|m.67668/c72524_g3_i1|m.9634/c60241_g1_i1|m.5980/c24515_g1_i1|m.2633/c46265_g1_i1|m.5024/c162075_g1_i1|m.100681/c140384_g1_i1|m.98628/c41934_g1_i1|m.4629/c153397_g1_…	25
GO:0002230	positive regulation of defense response to virus by host	24/3804	92/43701	7.66358e-07	1.66517e-05	1.48093e-05	c100634_g2_i2|m.35351/c96406_g1_i1|m.24989/c170194_g1_i1|m.101495/c62898_g1_i1|m.6498/c106509_g3_i1|m.59952/c105978_g5_i1|m.57084/c109349_g2_i4|m.78707/c108175_g4_i1|m.70621/c105245_g12_i1|m.53306/c107464_g5_i1|m.65802/c75972_g1_i1|m.10328/c107464_g7_i1|m.65807/c109563_g2_i1|m.80388/c109774_g1_i1|m.81817/c109774_g1_i10|m.81827/c109768_g9_i2|m.81784/c109563_g2_i11|m.80402/c109563_g2_i10|m.80401/c1…	24
GO:0007606	sensory perception of chemical stimulus	20/3804	68/43701	8.01312e-07	1.71989e-05	1.52959e-05	c111115_g3_i3|m.93122/c111115_g3_i7|m.93141/c109944_g2_i1|m.83146/c98390_g1_i3|m.29359/c109536_g2_i4|m.80076/c111090_g1_i1|m.92876/c106561_g1_i1|m.60221/c110876_g2_i4|m.91004/c109369_g2_i1|m.78832/c109141_g4_i2|m.77327/c76736_g2_i1|m.10533/c111246_g1_i4|m.94192/c111251_g1_i1|m.94217/c109336_g2_i2|m.78590/c110699_g3_i1|m.89418/c110876_g2_i2|m.91002/c102673_g2_i4|m.41973/c110428_g2_i1|m.86954/c1059…	20
GO:0080142	regulation of salicylic acid biosynthetic process	20/3804	68/43701	8.01312e-07	1.71989e-05	1.52959e-05	c108175_g4_i1|m.70621/c105245_g12_i1|m.53306/c107464_g5_i1|m.65802/c75972_g1_i1|m.10328/c107464_g7_i1|m.65807/c107464_g2_i1|m.65801/c109563_g2_i1|m.80388/c109774_g1_i8|m.81825/c109774_g1_i1|m.81817/c109774_g1_i10|m.81827/c109563_g2_i11|m.80402/c109563_g2_i10|m.80401/c109563_g2_i4|m.80393/c106807_g1_i1|m.61726/c107361_g1_i3|m.65119/c108175_g4_i4|m.70624/c109214_g2_i3|m.77806/c109214_g5_i1|m.77807/…	20
GO:1900367	positive regulation of defense response to insect	20/3804	68/43701	8.01312e-07	1.71989e-05	1.52959e-05	c108175_g4_i1|m.70621/c105245_g12_i1|m.53306/c107464_g5_i1|m.65802/c75972_g1_i1|m.10328/c107464_g7_i1|m.65807/c107464_g2_i1|m.65801/c109563_g2_i1|m.80388/c109774_g1_i8|m.81825/c109774_g1_i1|m.81817/c109774_g1_i10|m.81827/c109563_g2_i11|m.80402/c109563_g2_i10|m.80401/c109563_g2_i4|m.80393/c106807_g1_i1|m.61726/c107361_g1_i3|m.65119/c108175_g4_i4|m.70624/c109214_g2_i3|m.77806/c109214_g5_i1|m.77807/…	20
GO:0010103	stomatal complex morphogenesis	37/3804	181/43701	8.23491e-07	1.75956e-05	1.56487e-05	c100573_g2_i1|m.35194/c123324_g1_i1|m.96984/c73376_g1_i1|m.9813/c98004_g2_i1|m.28460/c109696_g6_i2|m.81216/c105531_g4_i1|m.54790/c109076_g1_i1|m.76864/c98004_g6_i1|m.28466/c100431_g1_i1|m.34834/c109916_g1_i5|m.82933/c109916_g1_i4|m.82931/c109916_g1_i1|m.82919/c107529_g2_i1|m.66180/c111243_g2_i1|m.94168/c111243_g2_i2|m.94170/c109688_g3_i6|m.81160/c81641_g1_i1|m.11915/c89991_g1_i1|m.16952/c98004_g3…	37
GO:0090313	regulation of protein targeting to membrane	21/3804	74/43701	8.26459e-07	1.75956e-05	1.56487e-05	c104914_g5_i2|m.51528/c110875_g1_i3|m.90985/c90107_g1_i1|m.17049/c101230_g3_i2|m.37056/c110408_g2_i1|m.86753/c101007_g1_i1|m.36407/c108589_g1_i1|m.73594/c110926_g1_i1|m.91432/c105922_g2_i1|m.56787/c110926_g1_i4|m.91437/c107470_g3_i2|m.65850/c105922_g3_i1|m.56788/c110926_g2_i2|m.91440/c110926_g2_i1|m.91434/c62392_g1_i1|m.6368/c110957_g10_i2|m.91664/c111005_g1_i6|m.92127/c110731_g1_i6|m.89644/c7470…	21
GO:0044423	virion part	14/3804	36/43701	8.3778e-07	1.7765e-05	1.57994e-05	c106627_g5_i1|m.60652/c104026_g1_i1|m.47567/c137846_g1_i1|m.98382/c90961_g1_i2|m.17881/c108152_g10_i1|m.70467/c110988_g1_i1|m.91949/c72399_g1_i1|m.9555/c111357_g1_i2|m.95042/c134633_g1_i1|m.97840/c97949_g1_i2|m.28359/c96109_g1_i1|m.24532/c99963_g5_i1|m.33435/c110093_g2_i2|m.84318/c39106_g1_i1|m.4099	14
GO:0019226	transmission of nerve impulse	18/3804	57/43701	8.86166e-07	1.86413e-05	1.65787e-05	c110875_g1_i3|m.90985/c90107_g1_i1|m.17049/c101230_g3_i2|m.37056/c110408_g2_i1|m.86753/c101007_g1_i1|m.36407/c108589_g1_i1|m.73594/c110926_g1_i1|m.91432/c105922_g2_i1|m.56787/c110926_g1_i4|m.91437/c105922_g3_i1|m.56788/c110926_g2_i2|m.91440/c110926_g2_i1|m.91434/c62392_g1_i1|m.6368/c110957_g10_i2|m.91664/c110731_g1_i6|m.89644/c35192_g2_i1|m.3753/c74702_g2_i1|m.9996/c110266_g5_i1|m.85714	18
GO:0019228	neuronal action potential	18/3804	57/43701	8.86166e-07	1.86413e-05	1.65787e-05	c110875_g1_i3|m.90985/c90107_g1_i1|m.17049/c101230_g3_i2|m.37056/c110408_g2_i1|m.86753/c101007_g1_i1|m.36407/c108589_g1_i1|m.73594/c110926_g1_i1|m.91432/c105922_g2_i1|m.56787/c110926_g1_i4|m.91437/c105922_g3_i1|m.56788/c110926_g2_i2|m.91440/c110926_g2_i1|m.91434/c62392_g1_i1|m.6368/c110957_g10_i2|m.91664/c110731_g1_i6|m.89644/c35192_g2_i1|m.3753/c74702_g2_i1|m.9996/c110266_g5_i1|m.85714	18
GO:0016460	myosin II complex	12/3804	27/43701	9.29607e-07	1.94775e-05	1.73224e-05	c15104_g1_i1|m.1551/c72524_g3_i1|m.9634/c8278_g1_i2|m.642/c154915_g1_i1|m.100049/c36762_g1_i1|m.3884/c162256_g1_i1|m.100728/c24515_g1_i1|m.2633/c46265_g1_i1|m.5024/c131658_g1_i1|m.97629/c153413_g1_i1|m.99932/c174246_g1_i1|m.101760/c41491_g2_i1|m.4550	12
GO:0019013	viral nucleocapsid	13/3804	32/43701	1.14593e-06	2.39151e-05	2.1269e-05	c106627_g5_i1|m.60652/c137846_g1_i1|m.98382/c90961_g1_i2|m.17881/c108152_g10_i1|m.70467/c110988_g1_i1|m.91949/c72399_g1_i1|m.9555/c111357_g1_i2|m.95042/c134633_g1_i1|m.97840/c97949_g1_i2|m.28359/c96109_g1_i1|m.24532/c99963_g5_i1|m.33435/c110093_g2_i2|m.84318/c39106_g1_i1|m.4099	13
GO:0003015	heart process	26/3804	107/43701	1.19133e-06	2.44755e-05	2.17674e-05	c101230_g2_i3|m.37065/c110875_g1_i3|m.90985/c101230_g3_i2|m.37056/c109550_g1_i7|m.80269/c110926_g1_i6|m.91441/c110926_g1_i4|m.91437/c105922_g3_i1|m.56788/c110731_g1_i6|m.89644/c107738_g1_i1|m.67664/c107738_g1_i4|m.67668/c72524_g3_i1|m.9634/c36762_g1_i1|m.3884/c60241_g1_i1|m.5980/c24515_g1_i1|m.2633/c127519_g1_i1|m.97395/c152080_g1_i1|m.99794/c162075_g1_i1|m.100681/c140384_g1_i1|m.98628/c41934_g1_…	26
GO:0052314	phytoalexin metabolic process	26/3804	107/43701	1.19133e-06	2.44755e-05	2.17674e-05	c108175_g4_i1|m.70621/c105245_g12_i1|m.53306/c107464_g5_i1|m.65802/c75972_g1_i1|m.10328/c107464_g7_i1|m.65807/c107464_g2_i1|m.65801/c109563_g2_i1|m.80388/c109774_g1_i8|m.81825/c109774_g1_i1|m.81817/c109774_g1_i10|m.81827/c109563_g2_i11|m.80402/c109563_g2_i10|m.80401/c109563_g2_i4|m.80393/c106807_g1_i1|m.61726/c107361_g1_i3|m.65119/c108175_g4_i4|m.70624/c109214_g2_i3|m.77806/c109214_g5_i1|m.77807/…	26
GO:0052315	phytoalexin biosynthetic process	26/3804	107/43701	1.19133e-06	2.44755e-05	2.17674e-05	c108175_g4_i1|m.70621/c105245_g12_i1|m.53306/c107464_g5_i1|m.65802/c75972_g1_i1|m.10328/c107464_g7_i1|m.65807/c107464_g2_i1|m.65801/c109563_g2_i1|m.80388/c109774_g1_i8|m.81825/c109774_g1_i1|m.81817/c109774_g1_i10|m.81827/c109563_g2_i11|m.80402/c109563_g2_i10|m.80401/c109563_g2_i4|m.80393/c106807_g1_i1|m.61726/c107361_g1_i3|m.65119/c108175_g4_i4|m.70624/c109214_g2_i3|m.77806/c109214_g5_i1|m.77807/…	26
GO:0060047	heart contraction	26/3804	107/43701	1.19133e-06	2.44755e-05	2.17674e-05	c101230_g2_i3|m.37065/c110875_g1_i3|m.90985/c101230_g3_i2|m.37056/c109550_g1_i7|m.80269/c110926_g1_i6|m.91441/c110926_g1_i4|m.91437/c105922_g3_i1|m.56788/c110731_g1_i6|m.89644/c107738_g1_i1|m.67664/c107738_g1_i4|m.67668/c72524_g3_i1|m.9634/c36762_g1_i1|m.3884/c60241_g1_i1|m.5980/c24515_g1_i1|m.2633/c127519_g1_i1|m.97395/c152080_g1_i1|m.99794/c162075_g1_i1|m.100681/c140384_g1_i1|m.98628/c41934_g1_…	26
GO:0009647	skotomorphogenesis	23/3804	88/43701	1.24667e-06	2.55133e-05	2.26904e-05	c98004_g5_i1|m.28465/c13355_g1_i1|m.1308/c109916_g2_i6|m.82935/c109916_g2_i2|m.82923/c109916_g2_i3|m.82928/c107529_g3_i1|m.66181/c101109_g1_i1|m.36687/c85263_g1_i1|m.13782/c85263_g2_i1|m.13783/c81641_g1_i1|m.11915/c100939_g1_i2|m.36240/c107187_g1_i2|m.63916/c91962_g1_i1|m.18805/c61851_g2_i1|m.6188/c100573_g1_i1|m.35193/c101701_g1_i1|m.38595/c107529_g6_i1|m.66188/c109845_g1_i2|m.82372/c105531_g7_i…	23
GO:0044091	membrane biogenesis	20/3804	70/43701	1.33244e-06	2.71632e-05	2.41577e-05	c104914_g5_i2|m.51528/c110875_g1_i3|m.90985/c90107_g1_i1|m.17049/c101230_g3_i2|m.37056/c110408_g2_i1|m.86753/c101007_g1_i1|m.36407/c108589_g1_i1|m.73594/c110926_g1_i1|m.91432/c105922_g2_i1|m.56787/c110926_g1_i4|m.91437/c107470_g3_i2|m.65850/c105922_g3_i1|m.56788/c110926_g2_i2|m.91440/c110926_g2_i1|m.91434/c62392_g1_i1|m.6368/c110957_g10_i2|m.91664/c111005_g1_i6|m.92127/c110731_g1_i6|m.89644/c7470…	20
GO:0060581	cell fate commitment involved in pattern specification	17/3804	53/43701	1.38755e-06	2.81779e-05	2.50602e-05	c109691_g4_i1|m.81176/c109536_g2_i4|m.80076/c111090_g1_i1|m.92876/c106561_g1_i1|m.60221/c110876_g2_i4|m.91004/c109369_g2_i1|m.78832/c109141_g4_i2|m.77327/c76736_g2_i1|m.10533/c111246_g1_i4|m.94192/c111251_g1_i1|m.94217/c109336_g2_i2|m.78590/c110699_g3_i1|m.89418/c59668_g1_i1|m.5864/c110876_g2_i2|m.91002/c102673_g2_i4|m.41973/c110428_g2_i1|m.86954/c105930_g2_i1|m.56817	17
GO:0010310	regulation of hydrogen peroxide metabolic process	33/3804	156/43701	1.42457e-06	2.88189e-05	2.56302e-05	c106807_g2_i1|m.61728/c108175_g4_i3|m.70623/c108175_g4_i1|m.70621/c108175_g4_i5|m.70625/c74723_g2_i2|m.10005/c109214_g4_i2|m.77804/c105245_g12_i1|m.53306/c107464_g5_i1|m.65802/c75972_g1_i1|m.10328/c107464_g7_i1|m.65807/c107464_g2_i1|m.65801/c109563_g2_i1|m.80388/c109774_g1_i8|m.81825/c109774_g1_i1|m.81817/c109774_g1_i10|m.81827/c109563_g2_i11|m.80402/c109563_g2_i10|m.80401/c109563_g2_i4|m.80393/c…	33
GO:0045211	postsynaptic membrane	36/3804	178/43701	1.49939e-06	3.02167e-05	2.68734e-05	c101230_g2_i3|m.37065/c104914_g5_i2|m.51528/c110875_g1_i3|m.90985/c90107_g1_i1|m.17049/c109691_g1_i2|m.81174/c101230_g3_i2|m.37056/c110408_g2_i1|m.86753/c109550_g1_i7|m.80269/c101007_g1_i1|m.36407/c108589_g1_i1|m.73594/c110926_g1_i1|m.91432/c105922_g2_i1|m.56787/c110926_g1_i6|m.91441/c110926_g1_i4|m.91437/c107470_g3_i2|m.65850/c105922_g3_i1|m.56788/c110926_g2_i2|m.91440/c110926_g2_i1|m.91434/c623…	36
GO:0042067	establishment of ommatidial planar polarity	16/3804	48/43701	1.58304e-06	3.17813e-05	2.82648e-05	c109536_g2_i4|m.80076/c111090_g1_i1|m.92876/c106561_g1_i1|m.60221/c110876_g2_i4|m.91004/c109369_g2_i1|m.78832/c109141_g4_i2|m.77327/c76736_g2_i1|m.10533/c111246_g1_i4|m.94192/c111251_g1_i1|m.94217/c109336_g2_i2|m.78590/c110699_g3_i1|m.89418/c110876_g2_i2|m.91002/c102673_g2_i4|m.41973/c110428_g2_i1|m.86954/c105930_g2_i1|m.56817/c46858_g1_i1|m.5055	16
GO:0072658	maintenance of protein location in membrane	17/3804	54/43701	1.86107e-06	3.70809e-05	3.2978e-05	c110875_g1_i3|m.90985/c90107_g1_i1|m.17049/c101230_g3_i2|m.37056/c110408_g2_i1|m.86753/c101007_g1_i1|m.36407/c108589_g1_i1|m.73594/c110926_g1_i1|m.91432/c105922_g2_i1|m.56787/c110926_g1_i4|m.91437/c105922_g3_i1|m.56788/c110926_g2_i2|m.91440/c110926_g2_i1|m.91434/c62392_g1_i1|m.6368/c110957_g10_i2|m.91664/c110731_g1_i6|m.89644/c74702_g2_i1|m.9996/c110266_g5_i1|m.85714	17
GO:0072660	maintenance of protein location in plasma membrane	17/3804	54/43701	1.86107e-06	3.70809e-05	3.2978e-05	c110875_g1_i3|m.90985/c90107_g1_i1|m.17049/c101230_g3_i2|m.37056/c110408_g2_i1|m.86753/c101007_g1_i1|m.36407/c108589_g1_i1|m.73594/c110926_g1_i1|m.91432/c105922_g2_i1|m.56787/c110926_g1_i4|m.91437/c105922_g3_i1|m.56788/c110926_g2_i2|m.91440/c110926_g2_i1|m.91434/c62392_g1_i1|m.6368/c110957_g10_i2|m.91664/c110731_g1_i6|m.89644/c74702_g2_i1|m.9996/c110266_g5_i1|m.85714	17
GO:0002238	response to molecule of fungal origin	23/3804	90/43701	1.90309e-06	3.77755e-05	3.35958e-05	c109768_g1_i1|m.81771/c104217_g1_i1|m.48410/c107529_g5_i1|m.66186/c123324_g1_i1|m.96984/c73376_g1_i1|m.9813/c29342_g2_i1|m.3268/c109845_g4_i1|m.82374/c105978_g7_i1|m.57091/c108987_g2_i2|m.76190/c98004_g2_i1|m.28460/c142073_g1_i1|m.98782/c98004_g6_i1|m.28466/c85817_g1_i1|m.14140/c98004_g4_i2|m.28464/c107496_g6_i1|m.66046/c105177_g1_i1|m.52951/c105177_g1_i4|m.52953/c91962_g1_i1|m.18805/c97554_g1_i3…	23
GO:0007043	cell-cell junction assembly	26/3804	110/43701	2.0853e-06	4.12373e-05	3.66746e-05	c101230_g2_i3|m.37065/c110875_g1_i3|m.90985/c109550_g1_i7|m.80269/c110926_g1_i4|m.91437/c105922_g3_i1|m.56788/c109536_g2_i4|m.80076/c110731_g1_i6|m.89644/c107738_g1_i4|m.67668/c111090_g1_i1|m.92876/c106561_g1_i1|m.60221/c110876_g2_i4|m.91004/c109369_g2_i1|m.78832/c109141_g4_i2|m.77327/c70800_g1_i2|m.8707/c76736_g2_i1|m.10533/c111246_g1_i4|m.94192/c106262_g1_i2|m.58648/c111251_g1_i1|m.94217/c10933…	26
GO:0008016	regulation of heart contraction	19/3804	66/43701	2.14713e-06	4.23016e-05	3.76211e-05	c101230_g2_i3|m.37065/c110875_g1_i3|m.90985/c101230_g3_i2|m.37056/c109550_g1_i7|m.80269/c110926_g1_i6|m.91441/c110926_g1_i4|m.91437/c105922_g3_i1|m.56788/c110731_g1_i6|m.89644/c107738_g1_i1|m.67664/c107738_g1_i4|m.67668/c72524_g3_i1|m.9634/c36762_g1_i1|m.3884/c60241_g1_i1|m.5980/c24515_g1_i1|m.2633/c140384_g1_i1|m.98628/c41934_g1_i1|m.4629/c2238_g2_i1|m.119/c69874_g1_i1|m.8364/c153413_g1_i1|m.999…	19
GO:0010087	phloem or xylem histogenesis	74/3804	489/43701	2.20433e-06	4.32672e-05	3.84798e-05	c108091_g6_i1|m.70087/c137764_g1_i1|m.98370/c106654_g9_i1|m.60803/c87097_g3_i1|m.15139/c153008_g1_i1|m.99896/c104973_g9_i1|m.51829/c108091_g2_i1|m.70079/c95691_g1_i3|m.23809/c104033_g1_i4|m.47605/c111345_g1_i2|m.94926/c109586_g1_i2|m.80560/c182109_g1_i1|m.102801/c162128_g1_i1|m.100695/c106654_g4_i1|m.60793/c106556_g3_i1|m.60196/c108091_g9_i1|m.70090/c110588_g8_i1|m.88371/c102936_g15_i1|m.42930/c1…	74
GO:0010232	vascular transport	28/3804	124/43701	2.27189e-06	4.42641e-05	3.93665e-05	c110732_g1_i2|m.89648/c108987_g2_i2|m.76190/c98004_g2_i1|m.28460/c109696_g6_i2|m.81216/c66735_g1_i1|m.7614/c105531_g2_i1|m.54784/c13355_g1_i1|m.1308/c104298_g4_i1|m.48781/c109916_g2_i4|m.82929/c109916_g2_i6|m.82935/c107529_g3_i1|m.66181/c107529_g2_i1|m.66180/c124232_g1_i1|m.97076/c163295_g1_i1|m.100910/c14235_g1_i1|m.1407/c106489_g1_i2|m.59785/c105177_g1_i1|m.52951/c105177_g1_i4|m.52953/c107187_g…	28
GO:0010233	phloem transport	28/3804	124/43701	2.27189e-06	4.42641e-05	3.93665e-05	c110732_g1_i2|m.89648/c108987_g2_i2|m.76190/c98004_g2_i1|m.28460/c109696_g6_i2|m.81216/c66735_g1_i1|m.7614/c105531_g2_i1|m.54784/c13355_g1_i1|m.1308/c104298_g4_i1|m.48781/c109916_g2_i4|m.82929/c109916_g2_i6|m.82935/c107529_g3_i1|m.66181/c107529_g2_i1|m.66180/c124232_g1_i1|m.97076/c163295_g1_i1|m.100910/c14235_g1_i1|m.1407/c106489_g1_i2|m.59785/c105177_g1_i1|m.52951/c105177_g1_i4|m.52953/c107187_g…	28
GO:0022409	positive regulation of cell-cell adhesion	23/3804	91/43701	2.33803e-06	4.44145e-05	3.95002e-05	c104914_g5_i2|m.51528/c110875_g1_i3|m.90985/c90107_g1_i1|m.17049/c101230_g3_i2|m.37056/c110408_g2_i1|m.86753/c101007_g1_i1|m.36407/c108589_g1_i1|m.73594/c110926_g1_i1|m.91432/c105922_g2_i1|m.56787/c110926_g1_i4|m.91437/c107470_g3_i2|m.65850/c105922_g3_i1|m.56788/c110926_g2_i2|m.91440/c110926_g2_i1|m.91434/c62392_g1_i1|m.6368/c110957_g10_i2|m.91664/c111005_g1_i6|m.92127/c110731_g1_i6|m.89644/c7470…	23
GO:0005918	septate junction	15/3804	44/43701	2.42261e-06	4.44145e-05	3.95002e-05	c109536_g2_i4|m.80076/c111090_g1_i1|m.92876/c106561_g1_i1|m.60221/c110876_g2_i4|m.91004/c109369_g2_i1|m.78832/c109141_g4_i2|m.77327/c76736_g2_i1|m.10533/c111246_g1_i4|m.94192/c111251_g1_i1|m.94217/c109336_g2_i2|m.78590/c110699_g3_i1|m.89418/c110876_g2_i2|m.91002/c102673_g2_i4|m.41973/c110428_g2_i1|m.86954/c105930_g2_i1|m.56817	15
GO:0007446	imaginal disc growth	15/3804	44/43701	2.42261e-06	4.44145e-05	3.95002e-05	c109536_g2_i4|m.80076/c111090_g1_i1|m.92876/c106561_g1_i1|m.60221/c110876_g2_i4|m.91004/c109369_g2_i1|m.78832/c109141_g4_i2|m.77327/c76736_g2_i1|m.10533/c111246_g1_i4|m.94192/c111251_g1_i1|m.94217/c109336_g2_i2|m.78590/c110699_g3_i1|m.89418/c110876_g2_i2|m.91002/c102673_g2_i4|m.41973/c110428_g2_i1|m.86954/c105930_g2_i1|m.56817	15
GO:0007464	R3/R4 cell fate commitment	15/3804	44/43701	2.42261e-06	4.44145e-05	3.95002e-05	c109536_g2_i4|m.80076/c111090_g1_i1|m.92876/c106561_g1_i1|m.60221/c110876_g2_i4|m.91004/c109369_g2_i1|m.78832/c109141_g4_i2|m.77327/c76736_g2_i1|m.10533/c111246_g1_i4|m.94192/c111251_g1_i1|m.94217/c109336_g2_i2|m.78590/c110699_g3_i1|m.89418/c110876_g2_i2|m.91002/c102673_g2_i4|m.41973/c110428_g2_i1|m.86954/c105930_g2_i1|m.56817	15
GO:0016327	apicolateral plasma membrane	15/3804	44/43701	2.42261e-06	4.44145e-05	3.95002e-05	c109536_g2_i4|m.80076/c111090_g1_i1|m.92876/c106561_g1_i1|m.60221/c110876_g2_i4|m.91004/c109369_g2_i1|m.78832/c109141_g4_i2|m.77327/c76736_g2_i1|m.10533/c111246_g1_i4|m.94192/c111251_g1_i1|m.94217/c109336_g2_i2|m.78590/c110699_g3_i1|m.89418/c110876_g2_i2|m.91002/c102673_g2_i4|m.41973/c110428_g2_i1|m.86954/c105930_g2_i1|m.56817	15
GO:0016332	establishment or maintenance of polarity of embryonic epithelium	15/3804	44/43701	2.42261e-06	4.44145e-05	3.95002e-05	c109536_g2_i4|m.80076/c111090_g1_i1|m.92876/c106561_g1_i1|m.60221/c110876_g2_i4|m.91004/c109369_g2_i1|m.78832/c109141_g4_i2|m.77327/c76736_g2_i1|m.10533/c111246_g1_i4|m.94192/c111251_g1_i1|m.94217/c109336_g2_i2|m.78590/c110699_g3_i1|m.89418/c110876_g2_i2|m.91002/c102673_g2_i4|m.41973/c110428_g2_i1|m.86954/c105930_g2_i1|m.56817	15
GO:0016334	establishment or maintenance of polarity of follicular epithelium	15/3804	44/43701	2.42261e-06	4.44145e-05	3.95002e-05	c109536_g2_i4|m.80076/c111090_g1_i1|m.92876/c106561_g1_i1|m.60221/c110876_g2_i4|m.91004/c109369_g2_i1|m.78832/c109141_g4_i2|m.77327/c76736_g2_i1|m.10533/c111246_g1_i4|m.94192/c111251_g1_i1|m.94217/c109336_g2_i2|m.78590/c110699_g3_i1|m.89418/c110876_g2_i2|m.91002/c102673_g2_i4|m.41973/c110428_g2_i1|m.86954/c105930_g2_i1|m.56817	15
GO:0016335	morphogenesis of larval imaginal disc epithelium	15/3804	44/43701	2.42261e-06	4.44145e-05	3.95002e-05	c109536_g2_i4|m.80076/c111090_g1_i1|m.92876/c106561_g1_i1|m.60221/c110876_g2_i4|m.91004/c109369_g2_i1|m.78832/c109141_g4_i2|m.77327/c76736_g2_i1|m.10533/c111246_g1_i4|m.94192/c111251_g1_i1|m.94217/c109336_g2_i2|m.78590/c110699_g3_i1|m.89418/c110876_g2_i2|m.91002/c102673_g2_i4|m.41973/c110428_g2_i1|m.86954/c105930_g2_i1|m.56817	15
GO:0016336	establishment or maintenance of polarity of larval imaginal disc epithelium	15/3804	44/43701	2.42261e-06	4.44145e-05	3.95002e-05	c109536_g2_i4|m.80076/c111090_g1_i1|m.92876/c106561_g1_i1|m.60221/c110876_g2_i4|m.91004/c109369_g2_i1|m.78832/c109141_g4_i2|m.77327/c76736_g2_i1|m.10533/c111246_g1_i4|m.94192/c111251_g1_i1|m.94217/c109336_g2_i2|m.78590/c110699_g3_i1|m.89418/c110876_g2_i2|m.91002/c102673_g2_i4|m.41973/c110428_g2_i1|m.86954/c105930_g2_i1|m.56817	15
GO:0030714	anterior/posterior axis specification, follicular epithelium	15/3804	44/43701	2.42261e-06	4.44145e-05	3.95002e-05	c109536_g2_i4|m.80076/c111090_g1_i1|m.92876/c106561_g1_i1|m.60221/c110876_g2_i4|m.91004/c109369_g2_i1|m.78832/c109141_g4_i2|m.77327/c76736_g2_i1|m.10533/c111246_g1_i4|m.94192/c111251_g1_i1|m.94217/c109336_g2_i2|m.78590/c110699_g3_i1|m.89418/c110876_g2_i2|m.91002/c102673_g2_i4|m.41973/c110428_g2_i1|m.86954/c105930_g2_i1|m.56817	15
GO:0044218	other organism cell membrane	15/3804	44/43701	2.42261e-06	4.44145e-05	3.95002e-05	c18531_g1_i1|m.2009/c109691_g1_i1|m.81172/c106627_g5_i1|m.60652/c107738_g1_i4|m.67668/c137846_g1_i1|m.98382/c90961_g1_i2|m.17881/c108152_g10_i1|m.70467/c110988_g1_i1|m.91949/c72399_g1_i1|m.9555/c111357_g1_i2|m.95042/c134633_g1_i1|m.97840/c96109_g1_i1|m.24532/c99963_g5_i1|m.33435/c110093_g2_i2|m.84318/c39106_g1_i1|m.4099	15
GO:0044279	other organism membrane	15/3804	44/43701	2.42261e-06	4.44145e-05	3.95002e-05	c18531_g1_i1|m.2009/c109691_g1_i1|m.81172/c106627_g5_i1|m.60652/c107738_g1_i4|m.67668/c137846_g1_i1|m.98382/c90961_g1_i2|m.17881/c108152_g10_i1|m.70467/c110988_g1_i1|m.91949/c72399_g1_i1|m.9555/c111357_g1_i2|m.95042/c134633_g1_i1|m.97840/c96109_g1_i1|m.24532/c99963_g5_i1|m.33435/c110093_g2_i2|m.84318/c39106_g1_i1|m.4099	15
GO:0045186	zonula adherens assembly	15/3804	44/43701	2.42261e-06	4.44145e-05	3.95002e-05	c109536_g2_i4|m.80076/c111090_g1_i1|m.92876/c106561_g1_i1|m.60221/c110876_g2_i4|m.91004/c109369_g2_i1|m.78832/c109141_g4_i2|m.77327/c76736_g2_i1|m.10533/c111246_g1_i4|m.94192/c111251_g1_i1|m.94217/c109336_g2_i2|m.78590/c110699_g3_i1|m.89418/c110876_g2_i2|m.91002/c102673_g2_i4|m.41973/c110428_g2_i1|m.86954/c105930_g2_i1|m.56817	15
GO:0045198	establishment of epithelial cell apical/basal polarity	15/3804	44/43701	2.42261e-06	4.44145e-05	3.95002e-05	c109536_g2_i4|m.80076/c111090_g1_i1|m.92876/c106561_g1_i1|m.60221/c110876_g2_i4|m.91004/c109369_g2_i1|m.78832/c109141_g4_i2|m.77327/c76736_g2_i1|m.10533/c111246_g1_i4|m.94192/c111251_g1_i1|m.94217/c109336_g2_i2|m.78590/c110699_g3_i1|m.89418/c110876_g2_i2|m.91002/c102673_g2_i4|m.41973/c110428_g2_i1|m.86954/c105930_g2_i1|m.56817	15
GO:0045570	regulation of imaginal disc growth	15/3804	44/43701	2.42261e-06	4.44145e-05	3.95002e-05	c109536_g2_i4|m.80076/c111090_g1_i1|m.92876/c106561_g1_i1|m.60221/c110876_g2_i4|m.91004/c109369_g2_i1|m.78832/c109141_g4_i2|m.77327/c76736_g2_i1|m.10533/c111246_g1_i4|m.94192/c111251_g1_i1|m.94217/c109336_g2_i2|m.78590/c110699_g3_i1|m.89418/c110876_g2_i2|m.91002/c102673_g2_i4|m.41973/c110428_g2_i1|m.86954/c105930_g2_i1|m.56817	15
GO:0045571	negative regulation of imaginal disc growth	15/3804	44/43701	2.42261e-06	4.44145e-05	3.95002e-05	c109536_g2_i4|m.80076/c111090_g1_i1|m.92876/c106561_g1_i1|m.60221/c110876_g2_i4|m.91004/c109369_g2_i1|m.78832/c109141_g4_i2|m.77327/c76736_g2_i1|m.10533/c111246_g1_i4|m.94192/c111251_g1_i1|m.94217/c109336_g2_i2|m.78590/c110699_g3_i1|m.89418/c110876_g2_i2|m.91002/c102673_g2_i4|m.41973/c110428_g2_i1|m.86954/c105930_g2_i1|m.56817	15
GO:0048056	R3/R4 cell differentiation	15/3804	44/43701	2.42261e-06	4.44145e-05	3.95002e-05	c109536_g2_i4|m.80076/c111090_g1_i1|m.92876/c106561_g1_i1|m.60221/c110876_g2_i4|m.91004/c109369_g2_i1|m.78832/c109141_g4_i2|m.77327/c76736_g2_i1|m.10533/c111246_g1_i4|m.94192/c111251_g1_i1|m.94217/c109336_g2_i2|m.78590/c110699_g3_i1|m.89418/c110876_g2_i2|m.91002/c102673_g2_i4|m.41973/c110428_g2_i1|m.86954/c105930_g2_i1|m.56817	15
GO:1903522	regulation of blood circulation	20/3804	73/43701	2.74087e-06	5.00754e-05	4.45348e-05	c101230_g2_i3|m.37065/c110875_g1_i3|m.90985/c101230_g3_i2|m.37056/c109550_g1_i7|m.80269/c110926_g1_i6|m.91441/c110926_g1_i4|m.91437/c105922_g3_i1|m.56788/c110731_g1_i6|m.89644/c107738_g1_i1|m.67664/c107738_g1_i4|m.67668/c35192_g2_i1|m.3753/c72524_g3_i1|m.9634/c36762_g1_i1|m.3884/c60241_g1_i1|m.5980/c24515_g1_i1|m.2633/c140384_g1_i1|m.98628/c41934_g1_i1|m.4629/c2238_g2_i1|m.119/c69874_g1_i1|m.8364…	20
GO:0010521	telomerase inhibitor activity	16/3804	50/43701	2.9212e-06	5.30032e-05	4.71386e-05	c110930_g1_i2|m.91466/c111349_g1_i1|m.94968/c106303_g6_i1|m.58801/c106303_g6_i7|m.58806/c60947_g1_i1|m.6037/c105885_g2_i1|m.56583/c82703_g1_i1|m.12456/c105885_g2_i1|m.56584/c80545_g2_i1|m.11667/c111161_g2_i1|m.93500/c76564_g3_i1|m.10483/c74991_g1_i1|m.10091/c105091_g1_i2|m.52494/c135278_g1_i1|m.98017/c108341_g2_i1|m.71798/c96785_g1_i1|m.25640	16
GO:0030430	host cell cytoplasm	16/3804	50/43701	2.9212e-06	5.30032e-05	4.71386e-05	c106627_g5_i1|m.60652/c93238_g3_i1|m.20049/c80585_g3_i1|m.11680/c91708_g2_i1|m.18593/c137846_g1_i1|m.98382/c90961_g1_i2|m.17881/c77377_g1_i1|m.10750/c59126_g1_i1|m.5767/c120581_g1_i1|m.96525/c110914_g4_i2|m.91336/c8649_g1_i1|m.697/c112289_g1_i1|m.95753/c102062_g2_i2|m.39768/c90280_g2_i1|m.17213/c110093_g2_i2|m.84318/c116718_g1_i1|m.96204	16
GO:0010067	procambium histogenesis	31/3804	147/43701	3.13034e-06	5.66035e-05	5.03405e-05	c111169_g3_i1|m.93563/c108685_g4_i2|m.74190/c104298_g4_i1|m.48781/c104298_g3_i1|m.48780/c111243_g2_i1|m.94168/c111243_g2_i2|m.94170/c109688_g3_i6|m.81160/c107529_g3_i1|m.66182/c100651_g1_i1|m.35405/c100651_g1_i2|m.35407/c105380_g1_i1|m.54055/c110744_g4_i1|m.89747/c110744_g3_i1|m.89742/c111270_g2_i1|m.94344/c109183_g3_i1|m.77645/c109183_g6_i1|m.77650/c110053_g4_i1|m.84022/c110053_g5_i1|m.84024/c91…	31
GO:0044325	ion channel binding	28/3804	126/43701	3.16895e-06	5.71059e-05	5.07874e-05	c101230_g2_i3|m.37065/c104914_g5_i2|m.51528/c110875_g1_i3|m.90985/c90107_g1_i1|m.17049/c101230_g3_i2|m.37056/c110408_g2_i1|m.86753/c109550_g1_i7|m.80269/c101007_g1_i1|m.36407/c108589_g1_i1|m.73594/c110926_g1_i1|m.91432/c105922_g2_i1|m.56787/c110926_g1_i6|m.91441/c110926_g1_i4|m.91437/c107470_g3_i2|m.65850/c105922_g3_i1|m.56788/c110926_g2_i2|m.91440/c110926_g2_i1|m.91434/c62392_g1_i1|m.6368/c11095…	28
GO:0052318	regulation of phytoalexin metabolic process	20/3804	74/43701	3.44991e-06	6.06536e-05	5.39425e-05	c108175_g4_i1|m.70621/c105245_g12_i1|m.53306/c107464_g5_i1|m.65802/c75972_g1_i1|m.10328/c107464_g7_i1|m.65807/c107464_g2_i1|m.65801/c109563_g2_i1|m.80388/c109774_g1_i8|m.81825/c109774_g1_i1|m.81817/c109774_g1_i10|m.81827/c109563_g2_i11|m.80402/c109563_g2_i10|m.80401/c109563_g2_i4|m.80393/c106807_g1_i1|m.61726/c107361_g1_i3|m.65119/c108175_g4_i4|m.70624/c109214_g2_i3|m.77806/c109214_g5_i1|m.77807/…	20
GO:0052319	regulation of phytoalexin biosynthetic process	20/3804	74/43701	3.44991e-06	6.06536e-05	5.39425e-05	c108175_g4_i1|m.70621/c105245_g12_i1|m.53306/c107464_g5_i1|m.65802/c75972_g1_i1|m.10328/c107464_g7_i1|m.65807/c107464_g2_i1|m.65801/c109563_g2_i1|m.80388/c109774_g1_i8|m.81825/c109774_g1_i1|m.81817/c109774_g1_i10|m.81827/c109563_g2_i11|m.80402/c109563_g2_i10|m.80401/c109563_g2_i4|m.80393/c106807_g1_i1|m.61726/c107361_g1_i3|m.65119/c108175_g4_i4|m.70624/c109214_g2_i3|m.77806/c109214_g5_i1|m.77807/…	20
GO:0052320	positive regulation of phytoalexin metabolic process	20/3804	74/43701	3.44991e-06	6.06536e-05	5.39425e-05	c108175_g4_i1|m.70621/c105245_g12_i1|m.53306/c107464_g5_i1|m.65802/c75972_g1_i1|m.10328/c107464_g7_i1|m.65807/c107464_g2_i1|m.65801/c109563_g2_i1|m.80388/c109774_g1_i8|m.81825/c109774_g1_i1|m.81817/c109774_g1_i10|m.81827/c109563_g2_i11|m.80402/c109563_g2_i10|m.80401/c109563_g2_i4|m.80393/c106807_g1_i1|m.61726/c107361_g1_i3|m.65119/c108175_g4_i4|m.70624/c109214_g2_i3|m.77806/c109214_g5_i1|m.77807/…	20
GO:0052322	positive regulation of phytoalexin biosynthetic process	20/3804	74/43701	3.44991e-06	6.06536e-05	5.39425e-05	c108175_g4_i1|m.70621/c105245_g12_i1|m.53306/c107464_g5_i1|m.65802/c75972_g1_i1|m.10328/c107464_g7_i1|m.65807/c107464_g2_i1|m.65801/c109563_g2_i1|m.80388/c109774_g1_i8|m.81825/c109774_g1_i1|m.81817/c109774_g1_i10|m.81827/c109563_g2_i11|m.80402/c109563_g2_i10|m.80401/c109563_g2_i4|m.80393/c106807_g1_i1|m.61726/c107361_g1_i3|m.65119/c108175_g4_i4|m.70624/c109214_g2_i3|m.77806/c109214_g5_i1|m.77807/…	20
GO:1901182	regulation of camalexin biosynthetic process	20/3804	74/43701	3.44991e-06	6.06536e-05	5.39425e-05	c108175_g4_i1|m.70621/c105245_g12_i1|m.53306/c107464_g5_i1|m.65802/c75972_g1_i1|m.10328/c107464_g7_i1|m.65807/c107464_g2_i1|m.65801/c109563_g2_i1|m.80388/c109774_g1_i8|m.81825/c109774_g1_i1|m.81817/c109774_g1_i10|m.81827/c109563_g2_i11|m.80402/c109563_g2_i10|m.80401/c109563_g2_i4|m.80393/c106807_g1_i1|m.61726/c107361_g1_i3|m.65119/c108175_g4_i4|m.70624/c109214_g2_i3|m.77806/c109214_g5_i1|m.77807/…	20
GO:1901183	positive regulation of camalexin biosynthetic process	20/3804	74/43701	3.44991e-06	6.06536e-05	5.39425e-05	c108175_g4_i1|m.70621/c105245_g12_i1|m.53306/c107464_g5_i1|m.65802/c75972_g1_i1|m.10328/c107464_g7_i1|m.65807/c107464_g2_i1|m.65801/c109563_g2_i1|m.80388/c109774_g1_i8|m.81825/c109774_g1_i1|m.81817/c109774_g1_i10|m.81827/c109563_g2_i11|m.80402/c109563_g2_i10|m.80401/c109563_g2_i4|m.80393/c106807_g1_i1|m.61726/c107361_g1_i3|m.65119/c108175_g4_i4|m.70624/c109214_g2_i3|m.77806/c109214_g5_i1|m.77807/…	20
GO:0032211	negative regulation of telomere maintenance via telomerase	18/3804	62/43701	3.45771e-06	6.06536e-05	5.39425e-05	c110930_g1_i2|m.91466/c111349_g1_i1|m.94968/c106303_g6_i1|m.58801/c106303_g6_i7|m.58806/c60947_g1_i1|m.6037/c105885_g2_i1|m.56583/c82703_g1_i1|m.12456/c105885_g2_i1|m.56584/c80545_g2_i1|m.11667/c111161_g2_i1|m.93500/c76564_g3_i1|m.10483/c74991_g1_i1|m.10091/c105091_g1_i2|m.52494/c135278_g1_i1|m.98017/c108341_g2_i1|m.71798/c96785_g1_i1|m.25640/c96124_g1_i2|m.24543/c96124_g1_i3|m.24544	18
GO:0032491	detection of molecule of fungal origin	18/3804	62/43701	3.45771e-06	6.06536e-05	5.39425e-05	c107529_g5_i1|m.66186/c123324_g1_i1|m.96984/c73376_g1_i1|m.9813/c29342_g2_i1|m.3268/c109845_g4_i1|m.82374/c108987_g2_i2|m.76190/c98004_g2_i1|m.28460/c142073_g1_i1|m.98782/c98004_g6_i1|m.28466/c85817_g1_i1|m.14140/c98004_g4_i2|m.28464/c105177_g1_i1|m.52951/c105177_g1_i4|m.52953/c91962_g1_i1|m.18805/c107612_g1_i1|m.66762/c111243_g1_i1|m.94166/c138411_g1_i1|m.98439/c99513_g2_i2|m.32286	18
GO:0007016	cytoskeletal anchoring at plasma membrane	10/3804	21/43701	3.53873e-06	6.1665e-05	5.4842e-05	c110875_g1_i3|m.90985/c101230_g3_i2|m.37056/c110408_g2_i1|m.86753/c110926_g1_i4|m.91437/c105922_g3_i1|m.56788/c110926_g2_i2|m.91440/c110926_g2_i1|m.91434/c110957_g10_i2|m.91664/c110731_g1_i6|m.89644/c74702_g2_i1|m.9996	10
GO:0032982	myosin filament	10/3804	21/43701	3.53873e-06	6.1665e-05	5.4842e-05	c15104_g1_i1|m.1551/c72524_g3_i1|m.9634/c8278_g1_i2|m.642/c154915_g1_i1|m.100049/c36762_g1_i1|m.3884/c184345_g1_i1|m.102895/c162256_g1_i1|m.100728/c131658_g1_i1|m.97629/c153413_g1_i1|m.99932/c41491_g2_i1|m.4550	10
GO:0020002	host cell plasma membrane	12/3804	30/43701	3.60839e-06	6.26721e-05	5.57377e-05	c106627_g5_i1|m.60652/c137846_g1_i1|m.98382/c90961_g1_i2|m.17881/c108152_g10_i1|m.70467/c110988_g1_i1|m.91949/c72399_g1_i1|m.9555/c111357_g1_i2|m.95042/c134633_g1_i1|m.97840/c96109_g1_i1|m.24532/c99963_g5_i1|m.33435/c110093_g2_i2|m.84318/c39106_g1_i1|m.4099	12
GO:0002213	defense response to insect	31/3804	150/43701	4.86512e-06	8.42223e-05	7.49035e-05	c108175_g4_i1|m.70621/c105245_g12_i1|m.53306/c107464_g5_i1|m.65802/c75972_g1_i1|m.10328/c107464_g7_i1|m.65807/c107464_g2_i1|m.65801/c109563_g2_i1|m.80388/c109774_g1_i8|m.81825/c109774_g1_i1|m.81817/c109774_g1_i10|m.81827/c96252_g2_i1|m.24733/c71465_g2_i1|m.9075/c82901_g1_i1|m.12580/c109563_g2_i11|m.80402/c109563_g2_i10|m.80401/c109563_g2_i4|m.80393/c106807_g1_i1|m.61726/c107361_g1_i3|m.65119/c108…	31
GO:0007391	dorsal closure	16/3804	52/43701	5.1966e-06	8.96669e-05	7.97456e-05	c109536_g2_i4|m.80076/c111090_g1_i1|m.92876/c106561_g1_i1|m.60221/c110876_g2_i4|m.91004/c109369_g2_i1|m.78832/c109141_g4_i2|m.77327/c76736_g2_i1|m.10533/c111246_g1_i4|m.94192/c111251_g1_i1|m.94217/c109336_g2_i2|m.78590/c110699_g3_i1|m.89418/c110876_g2_i2|m.91002/c102673_g2_i4|m.41973/c110428_g2_i1|m.86954/c105930_g2_i1|m.56817/c46858_g1_i1|m.5055	16
GO:0034329	cell junction assembly	32/3804	158/43701	5.40069e-06	9.28848e-05	8.26075e-05	c101230_g2_i3|m.37065/c110875_g1_i3|m.90985/c109550_g1_i7|m.80269/c110926_g1_i4|m.91437/c105922_g3_i1|m.56788/c109536_g2_i4|m.80076/c110731_g1_i6|m.89644/c107738_g1_i4|m.67668/c111090_g1_i1|m.92876/c106561_g1_i1|m.60221/c110876_g2_i4|m.91004/c109369_g2_i1|m.78832/c109141_g4_i2|m.77327/c70800_g1_i2|m.8707/c76736_g2_i1|m.10533/c111246_g1_i4|m.94192/c106262_g1_i2|m.58648/c111251_g1_i1|m.94217/c10933…	32
GO:0090002	establishment of protein localization to plasma membrane	42/3804	234/43701	5.48199e-06	9.3977e-05	8.35788e-05	c101230_g2_i3|m.37065/c111115_g3_i3|m.93122/c111115_g3_i7|m.93141/c104484_g2_i8|m.49566/c104484_g2_i6|m.49556/c104914_g5_i2|m.51528/c110875_g1_i3|m.90985/c124789_g1_i1|m.97139/c90107_g1_i1|m.17049/c101230_g3_i2|m.37056/c110408_g2_i1|m.86753/c109550_g1_i7|m.80269/c109691_g1_i1|m.81172/c101007_g1_i1|m.36407/c108589_g1_i1|m.73594/c110926_g1_i1|m.91432/c105922_g2_i1|m.56787/c110926_g1_i6|m.91441/c110…	42
GO:0044806	G-quadruplex DNA unwinding	17/3804	58/43701	5.56353e-06	9.50661e-05	8.45474e-05	c110930_g1_i2|m.91466/c111349_g1_i1|m.94968/c106303_g6_i1|m.58801/c106303_g6_i7|m.58806/c60947_g1_i1|m.6037/c105885_g2_i1|m.56583/c82703_g1_i1|m.12456/c105885_g2_i1|m.56584/c80545_g2_i1|m.11667/c111161_g2_i1|m.93500/c76564_g3_i1|m.10483/c74991_g1_i1|m.10091/c105091_g1_i2|m.52494/c135278_g1_i1|m.98017/c103875_g3_i1|m.46926/c108341_g2_i1|m.71798/c96785_g1_i1|m.25640	17
GO:0043385	mycotoxin metabolic process	8/3804	14/43701	6.07813e-06	0.000103524	9.20698e-05	c39930_g1_i1|m.4222/c175676_g1_i1|m.102054/c65162_g1_i1|m.7023/c70219_g1_i1|m.8579/c145734_g1_i1|m.98958/c10575_g1_i1|m.902/c98271_g1_i2|m.29054/c97730_g1_i1|m.27870	8
GO:0001737	establishment of imaginal disc-derived wing hair orientation	15/3804	47/43701	6.15927e-06	0.000103901	9.24046e-05	c109536_g2_i4|m.80076/c111090_g1_i1|m.92876/c106561_g1_i1|m.60221/c110876_g2_i4|m.91004/c109369_g2_i1|m.78832/c109141_g4_i2|m.77327/c76736_g2_i1|m.10533/c111246_g1_i4|m.94192/c111251_g1_i1|m.94217/c109336_g2_i2|m.78590/c110699_g3_i1|m.89418/c110876_g2_i2|m.91002/c102673_g2_i4|m.41973/c110428_g2_i1|m.86954/c105930_g2_i1|m.56817	15
GO:0007318	pole plasm protein localization	15/3804	47/43701	6.15927e-06	0.000103901	9.24046e-05	c109536_g2_i4|m.80076/c111090_g1_i1|m.92876/c106561_g1_i1|m.60221/c110876_g2_i4|m.91004/c109369_g2_i1|m.78832/c109141_g4_i2|m.77327/c76736_g2_i1|m.10533/c111246_g1_i4|m.94192/c111251_g1_i1|m.94217/c109336_g2_i2|m.78590/c110699_g3_i1|m.89418/c110876_g2_i2|m.91002/c102673_g2_i4|m.41973/c110428_g2_i1|m.86954/c105930_g2_i1|m.56817	15
GO:0072002	Malpighian tubule development	15/3804	47/43701	6.15927e-06	0.000103901	9.24046e-05	c109536_g2_i4|m.80076/c111090_g1_i1|m.92876/c106561_g1_i1|m.60221/c110876_g2_i4|m.91004/c109369_g2_i1|m.78832/c109141_g4_i2|m.77327/c76736_g2_i1|m.10533/c111246_g1_i4|m.94192/c111251_g1_i1|m.94217/c109336_g2_i2|m.78590/c110699_g3_i1|m.89418/c110876_g2_i2|m.91002/c102673_g2_i4|m.41973/c110428_g2_i1|m.86954/c105930_g2_i1|m.56817	15
GO:0080151	positive regulation of salicylic acid mediated signaling pathway	21/3804	83/43701	6.21957e-06	0.000104584	9.3012e-05	c108175_g4_i1|m.70621/c105245_g12_i1|m.53306/c107464_g5_i1|m.65802/c75972_g1_i1|m.10328/c107464_g7_i1|m.65807/c107464_g2_i1|m.65801/c109563_g2_i1|m.80388/c109774_g1_i8|m.81825/c109774_g1_i1|m.81817/c109774_g1_i10|m.81827/c109563_g2_i11|m.80402/c109563_g2_i10|m.80401/c109563_g2_i4|m.80393/c106807_g1_i1|m.61726/c107361_g1_i3|m.65119/c108175_g4_i4|m.70624/c109214_g2_i3|m.77806/c109214_g5_i1|m.77807/…	21
GO:0042438	melanin biosynthetic process	9/3804	18/43701	6.66488e-06	0.000111716	9.93551e-05	c29263_g1_i1|m.3235/c70216_g1_i1|m.8576/c7983_g1_i1|m.576/c113010_g1_i1|m.95875/c176746_g1_i1|m.102216/c181448_g1_i1|m.102732/c48192_g1_i1|m.5139/c71669_g2_i1|m.9211/c97621_g1_i1|m.27632	9
GO:0007608	sensory perception of smell	16/3804	53/43701	6.84376e-06	0.000114351	0.000101699	c109536_g2_i4|m.80076/c111090_g1_i1|m.92876/c106561_g1_i1|m.60221/c110876_g2_i4|m.91004/c109369_g2_i1|m.78832/c109141_g4_i2|m.77327/c76736_g2_i1|m.10533/c111246_g1_i4|m.94192/c111251_g1_i1|m.94217/c109336_g2_i2|m.78590/c110699_g3_i1|m.89418/c110876_g2_i2|m.91002/c102673_g2_i4|m.41973/c110428_g2_i1|m.86954/c105930_g2_i1|m.56817/c91093_g2_i1|m.18007	16
GO:0050505	hydroquinone glucosyltransferase activity	13/3804	37/43701	7.75533e-06	0.000129174	0.000114881	c105756_g1_i1|m.55878/c105756_g1_i2|m.55880/c105756_g1_i3|m.55881/c24214_g1_i1|m.2588/c105756_g1_i4|m.55882/c105756_g2_i1|m.55884/c106171_g2_i1|m.57973/c106171_g4_i1|m.57974/c24214_g2_i1|m.2589/c106171_g4_i3|m.57977/c106171_g4_i2|m.57976/c106171_g4_i4|m.57978/c106171_g6_i1|m.57979	13
GO:0002168	instar larval development	15/3804	48/43701	8.23938e-06	0.00013595	0.000120907	c109536_g2_i4|m.80076/c111090_g1_i1|m.92876/c106561_g1_i1|m.60221/c110876_g2_i4|m.91004/c109369_g2_i1|m.78832/c109141_g4_i2|m.77327/c76736_g2_i1|m.10533/c111246_g1_i4|m.94192/c111251_g1_i1|m.94217/c109336_g2_i2|m.78590/c110699_g3_i1|m.89418/c110876_g2_i2|m.91002/c102673_g2_i4|m.41973/c110428_g2_i1|m.86954/c105930_g2_i1|m.56817	15
GO:0030859	polarized epithelial cell differentiation	15/3804	48/43701	8.23938e-06	0.00013595	0.000120907	c109536_g2_i4|m.80076/c111090_g1_i1|m.92876/c106561_g1_i1|m.60221/c110876_g2_i4|m.91004/c109369_g2_i1|m.78832/c109141_g4_i2|m.77327/c76736_g2_i1|m.10533/c111246_g1_i4|m.94192/c111251_g1_i1|m.94217/c109336_g2_i2|m.78590/c110699_g3_i1|m.89418/c110876_g2_i2|m.91002/c102673_g2_i4|m.41973/c110428_g2_i1|m.86954/c105930_g2_i1|m.56817	15
GO:0035089	establishment of apical/basal cell polarity	15/3804	48/43701	8.23938e-06	0.00013595	0.000120907	c109536_g2_i4|m.80076/c111090_g1_i1|m.92876/c106561_g1_i1|m.60221/c110876_g2_i4|m.91004/c109369_g2_i1|m.78832/c109141_g4_i2|m.77327/c76736_g2_i1|m.10533/c111246_g1_i4|m.94192/c111251_g1_i1|m.94217/c109336_g2_i2|m.78590/c110699_g3_i1|m.89418/c110876_g2_i2|m.91002/c102673_g2_i4|m.41973/c110428_g2_i1|m.86954/c105930_g2_i1|m.56817	15
GO:1904357	negative regulation of telomere maintenance via telomere lengthening	22/3804	91/43701	8.37899e-06	0.000137823	0.000122573	c110930_g1_i2|m.91466/c111349_g1_i1|m.94968/c106303_g6_i1|m.58801/c106303_g6_i7|m.58806/c60947_g1_i1|m.6037/c105885_g2_i1|m.56583/c82703_g1_i1|m.12456/c105885_g2_i1|m.56584/c80545_g2_i1|m.11667/c62392_g1_i1|m.6368/c110957_g10_i2|m.91664/c110957_g10_i1|m.91663/c62392_g2_i1|m.6369/c111161_g2_i1|m.93500/c76564_g3_i1|m.10483/c74991_g1_i1|m.10091/c105091_g1_i2|m.52494/c135278_g1_i1|m.98017/c108341_g2_…	22
GO:0007009	plasma membrane organization	51/3804	311/43701	8.63938e-06	0.000141664	0.00012599	c101230_g2_i3|m.37065/c111115_g3_i3|m.93122/c111115_g3_i7|m.93141/c104484_g2_i8|m.49566/c104484_g2_i6|m.49556/c104914_g5_i2|m.51528/c110875_g1_i3|m.90985/c124789_g1_i1|m.97139/c90107_g1_i1|m.17049/c101230_g3_i2|m.37056/c110408_g2_i1|m.86753/c109550_g1_i7|m.80269/c109691_g1_i1|m.81172/c101007_g1_i1|m.36407/c108589_g1_i1|m.73594/c110926_g1_i1|m.91432/c105922_g2_i1|m.56787/c110926_g1_i6|m.91441/c110…	51
GO:0048544	recognition of pollen	49/3804	295/43701	8.99792e-06	0.000147087	0.000130812	c105315_g1_i3|m.53711/c66266_g1_i1|m.7288/c91794_g1_i1|m.18669/c111189_g2_i1|m.93788/c105964_g1_i1|m.57006/c107381_g1_i1|m.65261/c96357_g1_i1|m.24886/c86837_g2_i1|m.14956/c106894_g3_i1|m.62282/c110873_g1_i1|m.90965/c93280_g1_i1|m.20091/c97651_g1_i1|m.27689/c109343_g2_i2|m.78632/c109343_g2_i1|m.78625/c109343_g2_i3|m.78633/c109343_g3_i1|m.78628/c110943_g4_i1|m.91584/c62772_g1_i1|m.6470/c92858_g2_i1…	49
GO:0016849	phosphorus-oxygen lyase activity	21/3804	85/43701	9.29063e-06	0.000150937	0.000134236	c110378_g4_i1|m.86543/c108987_g2_i2|m.76190/c110861_g2_i3|m.90870/c85263_g2_i1|m.13783/c91962_g1_i1|m.18805/c111270_g2_i1|m.94344/c107775_g1_i4|m.67898/c107171_g1_i1|m.63835/c104573_g5_i3|m.49951/c105019_g1_i1|m.52026/c109042_g1_i1|m.76677/c109076_g1_i1|m.76865/c107612_g1_i1|m.66762/c109400_g7_i1|m.79111/c111379_g2_i1|m.95222/c110996_g3_i1|m.92032/c110996_g3_i2|m.92041/c149805_g1_i1|m.99540/c9434…	21
GO:2000279	negative regulation of DNA biosynthetic process	21/3804	85/43701	9.29063e-06	0.000150937	0.000134236	c105922_g1_i1|m.56783/c110930_g1_i2|m.91466/c111349_g1_i1|m.94968/c106303_g6_i1|m.58801/c106303_g6_i7|m.58806/c60947_g1_i1|m.6037/c105885_g2_i1|m.56583/c82703_g1_i1|m.12456/c105885_g2_i1|m.56584/c80545_g2_i1|m.11667/c111161_g2_i1|m.93500/c76564_g3_i1|m.10483/c74991_g1_i1|m.10091/c105091_g1_i2|m.52494/c135278_g1_i1|m.98017/c108341_g2_i1|m.71798/c96785_g1_i1|m.25640/c109682_g3_i2|m.81110/c109682_g3…	21
GO:0097060	synaptic membrane	36/3804	193/43701	1.03246e-05	0.00016722	0.000148718	c101230_g2_i3|m.37065/c104914_g5_i2|m.51528/c110875_g1_i3|m.90985/c90107_g1_i1|m.17049/c109691_g1_i2|m.81174/c101230_g3_i2|m.37056/c110408_g2_i1|m.86753/c109550_g1_i7|m.80269/c101007_g1_i1|m.36407/c108589_g1_i1|m.73594/c110926_g1_i1|m.91432/c105922_g2_i1|m.56787/c110926_g1_i6|m.91441/c110926_g1_i4|m.91437/c107470_g3_i2|m.65850/c105922_g3_i1|m.56788/c110926_g2_i2|m.91440/c110926_g2_i1|m.91434/c623…	36
GO:0001752	compound eye photoreceptor fate commitment	15/3804	49/43701	1.09211e-05	0.00017421	0.000154934	c109536_g2_i4|m.80076/c111090_g1_i1|m.92876/c106561_g1_i1|m.60221/c110876_g2_i4|m.91004/c109369_g2_i1|m.78832/c109141_g4_i2|m.77327/c76736_g2_i1|m.10533/c111246_g1_i4|m.94192/c111251_g1_i1|m.94217/c109336_g2_i2|m.78590/c110699_g3_i1|m.89418/c110876_g2_i2|m.91002/c102673_g2_i4|m.41973/c110428_g2_i1|m.86954/c105930_g2_i1|m.56817	15
GO:0016333	morphogenesis of follicular epithelium	15/3804	49/43701	1.09211e-05	0.00017421	0.000154934	c109536_g2_i4|m.80076/c111090_g1_i1|m.92876/c106561_g1_i1|m.60221/c110876_g2_i4|m.91004/c109369_g2_i1|m.78832/c109141_g4_i2|m.77327/c76736_g2_i1|m.10533/c111246_g1_i4|m.94192/c111251_g1_i1|m.94217/c109336_g2_i2|m.78590/c110699_g3_i1|m.89418/c110876_g2_i2|m.91002/c102673_g2_i4|m.41973/c110428_g2_i1|m.86954/c105930_g2_i1|m.56817	15
GO:0042706	eye photoreceptor cell fate commitment	15/3804	49/43701	1.09211e-05	0.00017421	0.000154934	c109536_g2_i4|m.80076/c111090_g1_i1|m.92876/c106561_g1_i1|m.60221/c110876_g2_i4|m.91004/c109369_g2_i1|m.78832/c109141_g4_i2|m.77327/c76736_g2_i1|m.10533/c111246_g1_i4|m.94192/c111251_g1_i1|m.94217/c109336_g2_i2|m.78590/c110699_g3_i1|m.89418/c110876_g2_i2|m.91002/c102673_g2_i4|m.41973/c110428_g2_i1|m.86954/c105930_g2_i1|m.56817	15
GO:0046552	photoreceptor cell fate commitment	15/3804	49/43701	1.09211e-05	0.00017421	0.000154934	c109536_g2_i4|m.80076/c111090_g1_i1|m.92876/c106561_g1_i1|m.60221/c110876_g2_i4|m.91004/c109369_g2_i1|m.78832/c109141_g4_i2|m.77327/c76736_g2_i1|m.10533/c111246_g1_i4|m.94192/c111251_g1_i1|m.94217/c109336_g2_i2|m.78590/c110699_g3_i1|m.89418/c110876_g2_i2|m.91002/c102673_g2_i4|m.41973/c110428_g2_i1|m.86954/c105930_g2_i1|m.56817	15
GO:0090162	establishment of epithelial cell polarity	15/3804	49/43701	1.09211e-05	0.00017421	0.000154934	c109536_g2_i4|m.80076/c111090_g1_i1|m.92876/c106561_g1_i1|m.60221/c110876_g2_i4|m.91004/c109369_g2_i1|m.78832/c109141_g4_i2|m.77327/c76736_g2_i1|m.10533/c111246_g1_i4|m.94192/c111251_g1_i1|m.94217/c109336_g2_i2|m.78590/c110699_g3_i1|m.89418/c110876_g2_i2|m.91002/c102673_g2_i4|m.41973/c110428_g2_i1|m.86954/c105930_g2_i1|m.56817	15
GO:0001944	vasculature development	70/3804	476/43701	1.09808e-05	0.000174635	0.000155312	c109691_g4_i1|m.81176/c123324_g1_i1|m.96984/c73376_g1_i1|m.9813/c111169_g3_i1|m.93563/c108685_g4_i2|m.74190/c98004_g2_i1|m.28460/c105531_g4_i1|m.54790/c59668_g1_i1|m.5864/c104298_g4_i1|m.48781/c104298_g3_i1|m.48780/c27213_g1_i1|m.2893/c66462_g1_i1|m.7378/c97669_g2_i1|m.27725/c100431_g1_i1|m.34834/c109916_g1_i5|m.82933/c109916_g1_i4|m.82931/c109916_g1_i1|m.82919/c107529_g2_i1|m.66180/c111243_g2_i1…	70
GO:2000068	regulation of defense response to insect	21/3804	86/43701	1.12902e-05	0.000179015	0.000159208	c108175_g4_i1|m.70621/c105245_g12_i1|m.53306/c107464_g5_i1|m.65802/c75972_g1_i1|m.10328/c107464_g7_i1|m.65807/c107464_g2_i1|m.65801/c109563_g2_i1|m.80388/c109774_g1_i8|m.81825/c109774_g1_i1|m.81817/c109774_g1_i10|m.81827/c109563_g2_i11|m.80402/c109563_g2_i10|m.80401/c109563_g2_i4|m.80393/c106807_g1_i1|m.61726/c107361_g1_i3|m.65119/c108175_g4_i4|m.70624/c109214_g2_i3|m.77806/c109214_g5_i1|m.77807/…	21
GO:0010148	transpiration	26/3804	120/43701	1.13514e-05	0.000179447	0.000159592	c123324_g1_i1|m.96984/c73376_g1_i1|m.9813/c98004_g2_i1|m.28460/c105531_g4_i1|m.54790/c100431_g1_i1|m.34834/c109916_g1_i5|m.82933/c109916_g1_i4|m.82931/c109916_g1_i1|m.82919/c107529_g2_i1|m.66180/c111243_g2_i1|m.94168/c111243_g2_i2|m.94170/c81641_g1_i1|m.11915/c89991_g1_i1|m.16952/c95692_g2_i1|m.23817/c104139_g3_i1|m.48038/c104139_g3_i2|m.48039/c105177_g1_i5|m.52954/c111379_g3_i1|m.95225/c107775_g…	26
GO:0035316	non-sensory hair organization	16/3804	55/43701	1.15945e-05	0.0001822	0.00016204	c109536_g2_i4|m.80076/c111090_g1_i1|m.92876/c106561_g1_i1|m.60221/c110876_g2_i4|m.91004/c109369_g2_i1|m.78832/c109141_g4_i2|m.77327/c76736_g2_i1|m.10533/c111246_g1_i4|m.94192/c111251_g1_i1|m.94217/c109336_g2_i2|m.78590/c110699_g3_i1|m.89418/c110876_g2_i2|m.91002/c24515_g1_i1|m.2633/c102673_g2_i4|m.41973/c110428_g2_i1|m.86954/c105930_g2_i1|m.56817	16
GO:0035317	imaginal disc-derived wing hair organization	16/3804	55/43701	1.15945e-05	0.0001822	0.00016204	c109536_g2_i4|m.80076/c111090_g1_i1|m.92876/c106561_g1_i1|m.60221/c110876_g2_i4|m.91004/c109369_g2_i1|m.78832/c109141_g4_i2|m.77327/c76736_g2_i1|m.10533/c111246_g1_i4|m.94192/c111251_g1_i1|m.94217/c109336_g2_i2|m.78590/c110699_g3_i1|m.89418/c110876_g2_i2|m.91002/c24515_g1_i1|m.2633/c102673_g2_i4|m.41973/c110428_g2_i1|m.86954/c105930_g2_i1|m.56817	16
GO:0006582	melanin metabolic process	9/3804	19/43701	1.16812e-05	0.000183017	0.000162767	c29263_g1_i1|m.3235/c70216_g1_i1|m.8576/c7983_g1_i1|m.576/c113010_g1_i1|m.95875/c176746_g1_i1|m.102216/c181448_g1_i1|m.102732/c48192_g1_i1|m.5139/c71669_g2_i1|m.9211/c97621_g1_i1|m.27632	9
GO:0071932	replication fork reversal	8/3804	15/43701	1.20251e-05	0.000187848	0.000167064	c110930_g1_i2|m.91466/c105885_g2_i1|m.56583/c82703_g1_i1|m.12456/c111161_g2_i1|m.93500/c76564_g3_i1|m.10483/c74991_g1_i1|m.10091/c105091_g1_i2|m.52494/c135278_g1_i1|m.98017	8
GO:0035725	sodium ion transmembrane transport	20/3804	80/43701	1.24411e-05	0.000193773	0.000172333	c104914_g5_i2|m.51528/c110875_g1_i3|m.90985/c90107_g1_i1|m.17049/c101230_g3_i2|m.37056/c110408_g2_i1|m.86753/c101007_g1_i1|m.36407/c108589_g1_i1|m.73594/c110926_g1_i1|m.91432/c105922_g2_i1|m.56787/c110926_g1_i4|m.91437/c107470_g3_i2|m.65850/c105922_g3_i1|m.56788/c110926_g2_i2|m.91440/c110926_g2_i1|m.91434/c62392_g1_i1|m.6368/c110957_g10_i2|m.91664/c111005_g1_i6|m.92127/c110731_g1_i6|m.89644/c7470…	20
GO:0009944	polarity specification of adaxial/abaxial axis	33/3804	172/43701	1.28987e-05	0.00020031	0.000178146	c123324_g1_i1|m.96984/c73376_g1_i1|m.9813/c98004_g2_i1|m.28460/c105531_g4_i1|m.54790/c100431_g1_i1|m.34834/c109916_g1_i5|m.82933/c109916_g1_i4|m.82931/c109916_g1_i1|m.82919/c107529_g2_i1|m.66180/c111243_g2_i1|m.94168/c111243_g2_i2|m.94170/c81641_g1_i1|m.11915/c89991_g1_i1|m.16952/c95692_g2_i1|m.23817/c103418_g4_i4|m.45024/c104139_g3_i1|m.48038/c104139_g3_i2|m.48039/c105177_g1_i5|m.52954/c111379_g…	33
GO:1901379	regulation of potassium ion transmembrane transport	27/3804	128/43701	1.30722e-05	0.000202409	0.000180013	c101230_g2_i3|m.37065/c104914_g5_i2|m.51528/c110875_g1_i3|m.90985/c90107_g1_i1|m.17049/c101230_g3_i2|m.37056/c110408_g2_i1|m.86753/c109550_g1_i7|m.80269/c101007_g1_i1|m.36407/c108589_g1_i1|m.73594/c110926_g1_i1|m.91432/c105922_g2_i1|m.56787/c110926_g1_i6|m.91441/c110926_g1_i4|m.91437/c107470_g3_i2|m.65850/c105922_g3_i1|m.56788/c110926_g2_i2|m.91440/c110926_g2_i1|m.91434/c62392_g1_i1|m.6368/c11095…	27
GO:0006898	receptor-mediated endocytosis	52/3804	324/43701	1.31582e-05	0.000203143	0.000180666	c109691_g4_i1|m.81176/c100573_g2_i1|m.35194/c139116_g1_i1|m.98515/c29342_g2_i1|m.3268/c100573_g3_i1|m.35195/c109924_g1_i3|m.82988/c101515_g1_i1|m.37973/c109845_g3_i1|m.82373/c110732_g1_i2|m.89648/c109845_g2_i1|m.82369/c111086_g3_i1|m.92774/c108987_g2_i3|m.76192/c98004_g6_i1|m.28466/c13355_g1_i1|m.1308/c59668_g1_i1|m.5864/c111243_g2_i1|m.94167/c100431_g1_i1|m.34834/c95692_g3_i1|m.23818/c106352_g4_…	52
GO:0043141	ATP-dependent 5'-3' DNA helicase activity	19/3804	74/43701	1.34921e-05	0.000207691	0.000184711	c110930_g1_i2|m.91466/c111349_g1_i1|m.94968/c106303_g6_i1|m.58801/c106303_g6_i7|m.58806/c60947_g1_i1|m.6037/c105885_g2_i1|m.56583/c82703_g1_i1|m.12456/c105885_g2_i1|m.56584/c80545_g2_i1|m.11667/c111161_g2_i1|m.93500/c76564_g3_i1|m.10483/c74991_g1_i1|m.10091/c103388_g16_i1|m.44820/c103679_g3_i4|m.46161/c103679_g3_i1|m.46158/c105091_g1_i2|m.52494/c135278_g1_i1|m.98017/c108341_g2_i1|m.71798/c96785_g…	19
GO:0019991	septate junction assembly	15/3804	50/43701	1.43496e-05	0.00022025	0.00019588	c109536_g2_i4|m.80076/c111090_g1_i1|m.92876/c106561_g1_i1|m.60221/c110876_g2_i4|m.91004/c109369_g2_i1|m.78832/c109141_g4_i2|m.77327/c76736_g2_i1|m.10533/c111246_g1_i4|m.94192/c111251_g1_i1|m.94217/c109336_g2_i2|m.78590/c110699_g3_i1|m.89418/c110876_g2_i2|m.91002/c102673_g2_i4|m.41973/c110428_g2_i1|m.86954/c105930_g2_i1|m.56817	15
GO:0048449	floral organ formation	44/3804	260/43701	1.56153e-05	0.000238983	0.00021254	c110575_g1_i23|m.88250/c98004_g5_i1|m.28465/c13355_g1_i1|m.1308/c109916_g2_i6|m.82935/c109916_g2_i2|m.82923/c109916_g2_i3|m.82928/c107529_g3_i1|m.66181/c101109_g1_i1|m.36687/c124232_g1_i1|m.97076/c110767_g1_i2|m.89970/c85263_g1_i1|m.13782/c85263_g2_i1|m.13783/c81641_g1_i1|m.11915/c163295_g1_i1|m.100910/c14235_g1_i1|m.1407/c111270_g3_i8|m.94353/c100939_g1_i2|m.36240/c104117_g4_i1|m.47939/c107187_g…	44
GO:0005536	glucose binding	12/3804	34/43701	1.64418e-05	0.000250904	0.000223143	c97592_g1_i1|m.27581/c101546_g4_i1|m.38064/c85995_g1_i1|m.14293/c105113_g1_i1|m.52608/c160715_g1_i1|m.100361/c90723_g1_i1|m.17652/c71581_g1_i1|m.9161/c147336_g1_i1|m.99021/c110406_g2_i2|m.86744/c110406_g2_i4|m.86746/c92742_g1_i1|m.19526/c948_g1_i1|m.55	12
GO:0009975	cyclase activity	21/3804	88/43701	1.64914e-05	0.000250936	0.000223171	c110378_g4_i1|m.86543/c108987_g2_i2|m.76190/c110861_g2_i3|m.90870/c85263_g2_i1|m.13783/c91962_g1_i1|m.18805/c111270_g2_i1|m.94344/c107775_g1_i4|m.67898/c107171_g1_i1|m.63835/c104573_g5_i3|m.49951/c105019_g1_i1|m.52026/c109042_g1_i1|m.76677/c109076_g1_i1|m.76865/c107612_g1_i1|m.66762/c109400_g7_i1|m.79111/c111379_g2_i1|m.95222/c110996_g3_i1|m.92032/c110996_g3_i2|m.92041/c149805_g1_i1|m.99540/c9434…	21
GO:0009943	adaxial/abaxial axis specification	33/3804	174/43701	1.65515e-05	0.000251126	0.00022334	c123324_g1_i1|m.96984/c73376_g1_i1|m.9813/c98004_g2_i1|m.28460/c105531_g4_i1|m.54790/c100431_g1_i1|m.34834/c109916_g1_i5|m.82933/c109916_g1_i4|m.82931/c109916_g1_i1|m.82919/c107529_g2_i1|m.66180/c111243_g2_i1|m.94168/c111243_g2_i2|m.94170/c81641_g1_i1|m.11915/c89991_g1_i1|m.16952/c95692_g2_i1|m.23817/c103418_g4_i4|m.45024/c104139_g3_i1|m.48038/c104139_g3_i2|m.48039/c105177_g1_i5|m.52954/c111379_g…	33
GO:0048825	cotyledon development	56/3804	361/43701	1.7335e-05	0.000262261	0.000233243	c108091_g6_i1|m.70087/c137764_g1_i1|m.98370/c106654_g9_i1|m.60803/c87097_g3_i1|m.15139/c153008_g1_i1|m.99896/c104973_g9_i1|m.51829/c108091_g2_i1|m.70079/c182109_g1_i1|m.102801/c162128_g1_i1|m.100695/c106654_g4_i1|m.60793/c106556_g3_i1|m.60196/c108091_g9_i1|m.70090/c110588_g8_i1|m.88371/c102936_g15_i1|m.42930/c103696_g7_i2|m.46222/c104973_g6_i1|m.51825/c21064_g1_i1|m.2317/c31796_g1_i1|m.3582/c9514…	56
GO:0004714	transmembrane receptor protein tyrosine kinase activity	32/3804	167/43701	1.77734e-05	0.000268125	0.000238458	c109866_g2_i1|m.82528/c87006_g3_i1|m.15089/c95692_g1_i1|m.23816/c66735_g1_i1|m.7614/c105531_g2_i1|m.54784/c13355_g1_i1|m.1308/c104298_g1_i1|m.48778/c109916_g2_i3|m.82928/c107529_g3_i1|m.66181/c101109_g1_i1|m.36687/c106352_g4_i1|m.59099/c109950_g2_i5|m.83198/c109950_g2_i1|m.83191/c107187_g1_i2|m.63916/c91962_g1_i1|m.18805/c109767_g3_i1|m.81759/c101701_g1_i1|m.38595/c107529_g6_i1|m.66188/c103953_g1…	32
GO:0090257	regulation of muscle system process	26/3804	123/43701	1.80182e-05	0.000271042	0.000241053	c101230_g2_i3|m.37065/c110875_g1_i3|m.90985/c101230_g3_i2|m.37056/c109550_g1_i7|m.80269/c110926_g1_i6|m.91441/c110926_g1_i4|m.91437/c105922_g3_i1|m.56788/c154994_g1_i1|m.100054/c110731_g1_i6|m.89644/c107738_g1_i1|m.67664/c107738_g1_i4|m.67668/c72524_g3_i1|m.9634/c60241_g1_i1|m.5980/c24515_g1_i1|m.2633/c46265_g1_i1|m.5024/c162075_g1_i1|m.100681/c140384_g1_i1|m.98628/c41934_g1_i1|m.4629/c153397_g1_…	26
GO:0002027	regulation of heart rate	15/3804	51/43701	1.86981e-05	0.000279678	0.000248732	c101230_g2_i3|m.37065/c110875_g1_i3|m.90985/c101230_g3_i2|m.37056/c109550_g1_i7|m.80269/c110926_g1_i6|m.91441/c110926_g1_i4|m.91437/c105922_g3_i1|m.56788/c110731_g1_i6|m.89644/c107738_g1_i1|m.67664/c107738_g1_i4|m.67668/c72524_g3_i1|m.9634/c36762_g1_i1|m.3884/c140384_g1_i1|m.98628/c41934_g1_i1|m.4629/c153413_g1_i1|m.99932	15
GO:0051974	negative regulation of telomerase activity	15/3804	51/43701	1.86981e-05	0.000279678	0.000248732	c110930_g1_i2|m.91466/c111349_g1_i1|m.94968/c106303_g6_i1|m.58801/c106303_g6_i7|m.58806/c60947_g1_i1|m.6037/c105885_g2_i1|m.56583/c105885_g2_i1|m.56584/c80545_g2_i1|m.11667/c111161_g2_i1|m.93500/c76564_g3_i1|m.10483/c74991_g1_i1|m.10091/c105091_g1_i2|m.52494/c135278_g1_i1|m.98017/c108341_g2_i1|m.71798/c96785_g1_i1|m.25640	15
GO:0031256	leading edge membrane	16/3804	57/43701	1.90803e-05	0.000282989	0.000251677	c101230_g2_i3|m.37065/c110875_g1_i3|m.90985/c90107_g1_i1|m.17049/c110926_g2_i2|m.91440/c110926_g2_i1|m.91434/c62392_g1_i1|m.6368/c110731_g1_i3|m.89639/c110731_g1_i4|m.89640/c107738_g1_i1|m.67664/c107738_g1_i4|m.67668/c33420_g1_i1|m.3683/c107470_g3_i1|m.65849/c74702_g2_i1|m.9996/c110266_g5_i1|m.85714/c2238_g2_i1|m.119/c69874_g1_i1|m.8364	16
GO:0033646	host intracellular part	16/3804	57/43701	1.90803e-05	0.000282989	0.000251677	c106627_g5_i1|m.60652/c93238_g3_i1|m.20049/c80585_g3_i1|m.11680/c91708_g2_i1|m.18593/c137846_g1_i1|m.98382/c90961_g1_i2|m.17881/c77377_g1_i1|m.10750/c59126_g1_i1|m.5767/c120581_g1_i1|m.96525/c110914_g4_i2|m.91336/c8649_g1_i1|m.697/c112289_g1_i1|m.95753/c102062_g2_i2|m.39768/c90280_g2_i1|m.17213/c110093_g2_i2|m.84318/c116718_g1_i1|m.96204	16
GO:0043656	intracellular region of host	16/3804	57/43701	1.90803e-05	0.000282989	0.000251677	c106627_g5_i1|m.60652/c93238_g3_i1|m.20049/c80585_g3_i1|m.11680/c91708_g2_i1|m.18593/c137846_g1_i1|m.98382/c90961_g1_i2|m.17881/c77377_g1_i1|m.10750/c59126_g1_i1|m.5767/c120581_g1_i1|m.96525/c110914_g4_i2|m.91336/c8649_g1_i1|m.697/c112289_g1_i1|m.95753/c102062_g2_i2|m.39768/c90280_g2_i1|m.17213/c110093_g2_i2|m.84318/c116718_g1_i1|m.96204	16
GO:0039660	structural constituent of virion	9/3804	20/43701	1.9593e-05	0.000289779	0.000257716	c106627_g5_i1|m.60652/c108152_g10_i1|m.70467/c110988_g1_i1|m.91949/c72399_g1_i1|m.9555/c111357_g1_i2|m.95042/c134633_g1_i1|m.97840/c96109_g1_i1|m.24532/c99963_g5_i1|m.33435/c39106_g1_i1|m.4099	9
GO:0000276	mitochondrial proton-transporting ATP synthase complex, coupling factor F(o)	7/3804	12/43701	2.01149e-05	0.000296666	0.000263841	c12978_g1_i1|m.1231/c13157_g1_i1|m.1270/c7695_g1_i1|m.549/c155575_g1_i1|m.100111/c85648_g1_i1|m.13991/c174266_g1_i1|m.101766/c76511_g1_i1|m.10469	7
GO:1904064	positive regulation of cation transmembrane transport	26/3804	124/43701	2.09274e-05	0.000307791	0.000273735	c101230_g2_i3|m.37065/c104914_g5_i2|m.51528/c110875_g1_i3|m.90985/c90107_g1_i1|m.17049/c101230_g3_i2|m.37056/c110408_g2_i1|m.86753/c109550_g1_i7|m.80269/c101007_g1_i1|m.36407/c108589_g1_i1|m.73594/c110926_g1_i1|m.91432/c105922_g2_i1|m.56787/c110926_g1_i6|m.91441/c110926_g1_i4|m.91437/c107470_g3_i2|m.65850/c105922_g3_i1|m.56788/c110926_g2_i2|m.91440/c110926_g2_i1|m.91434/c62392_g1_i1|m.6368/c11095…	26
GO:0002764	immune response-regulating signaling pathway	60/3804	398/43701	2.1392e-05	0.000313749	0.000279034	c109550_g2_i1|m.80257/c3651_g2_i1|m.296/c154994_g1_i1|m.100054/c111174_g4_i2|m.93623/c100573_g2_i1|m.35194/c98318_g1_i1|m.29161/c160547_g1_i1|m.100294/c106262_g1_i2|m.58648/c98004_g6_i1|m.28466/c15104_g1_i1|m.1551/c110867_g2_i1|m.90948/c106352_g4_i1|m.59099/c104117_g1_i1|m.47932/c104117_g7_i1|m.47941/c98178_g1_i1|m.28873/c104117_g7_i2|m.47942/c110767_g1_i1|m.89968/c109924_g1_i2|m.82987/c100651_g1…	60
GO:0042048	olfactory behavior	18/3804	70/43701	2.20675e-05	0.000322759	0.000287047	c109536_g2_i4|m.80076/c111090_g1_i1|m.92876/c106561_g1_i1|m.60221/c110876_g2_i4|m.91004/c109369_g2_i1|m.78832/c109141_g4_i2|m.77327/c76736_g2_i1|m.10533/c111246_g1_i4|m.94192/c111251_g1_i1|m.94217/c109336_g2_i2|m.78590/c110699_g3_i1|m.89418/c110876_g2_i2|m.91002/c102673_g2_i4|m.41973/c110428_g2_i1|m.86954/c103875_g2_i1|m.46925/c103875_g3_i1|m.46926/c105930_g2_i1|m.56817/c140384_g1_i1|m.98628	18
GO:0005859	muscle myosin complex	10/3804	25/43701	2.36776e-05	0.000345353	0.000307141	c15104_g1_i1|m.1551/c72524_g3_i1|m.9634/c8278_g1_i2|m.642/c154915_g1_i1|m.100049/c36762_g1_i1|m.3884/c46265_g1_i1|m.5024/c131658_g1_i1|m.97629/c153413_g1_i1|m.99932/c174246_g1_i1|m.101760/c41491_g2_i1|m.4550	10
GO:0090548	response to nitrate starvation	16/3804	58/43701	2.42296e-05	0.00035243	0.000313435	c73376_g1_i1|m.9813/c109950_g2_i5|m.83198/c109950_g2_i1|m.83191/c109950_g2_i2|m.83192/c110744_g4_i1|m.89747/c110744_g3_i1|m.89742/c110053_g4_i1|m.84022/c110053_g5_i1|m.84024/c91215_g2_i1|m.18153/c85577_g1_i1|m.13914/c107055_g9_i2|m.63120/c110587_g2_i2|m.88367/c109950_g1_i1|m.83190/c109950_g4_i1|m.83195/c109950_g4_i2|m.83202/c110744_g2_i1|m.89741	16
GO:0001578	microtubule bundle formation	23/3804	104/43701	2.51163e-05	0.000364324	0.000324013	c98004_g5_i1|m.28465/c13355_g1_i1|m.1308/c109916_g2_i6|m.82935/c109916_g2_i2|m.82923/c109916_g2_i3|m.82928/c107529_g3_i1|m.66181/c101109_g1_i1|m.36687/c85263_g1_i1|m.13782/c85263_g2_i1|m.13783/c81641_g1_i1|m.11915/c100939_g1_i2|m.36240/c107187_g1_i2|m.63916/c91962_g1_i1|m.18805/c61851_g2_i1|m.6188/c100573_g1_i1|m.35193/c101701_g1_i1|m.38595/c107529_g6_i1|m.66188/c109845_g1_i2|m.82372/c105531_g7_i…	23
GO:0007635	chemosensory behavior	18/3804	71/43701	2.71713e-05	0.000393053	0.000349563	c109536_g2_i4|m.80076/c111090_g1_i1|m.92876/c106561_g1_i1|m.60221/c110876_g2_i4|m.91004/c109369_g2_i1|m.78832/c109141_g4_i2|m.77327/c76736_g2_i1|m.10533/c111246_g1_i4|m.94192/c111251_g1_i1|m.94217/c109336_g2_i2|m.78590/c110699_g3_i1|m.89418/c110876_g2_i2|m.91002/c102673_g2_i4|m.41973/c110428_g2_i1|m.86954/c103875_g2_i1|m.46925/c103875_g3_i1|m.46926/c105930_g2_i1|m.56817/c140384_g1_i1|m.98628	18
GO:0001700	embryonic development via the syncytial blastoderm	17/3804	65/43701	2.918e-05	0.000420957	0.00037438	c109536_g2_i4|m.80076/c111090_g1_i1|m.92876/c106561_g1_i1|m.60221/c110876_g2_i4|m.91004/c109369_g2_i1|m.78832/c109141_g4_i2|m.77327/c76736_g2_i1|m.10533/c111246_g1_i4|m.94192/c111251_g1_i1|m.94217/c109336_g2_i2|m.78590/c110699_g3_i1|m.89418/c110876_g2_i2|m.91002/c24515_g1_i1|m.2633/c102673_g2_i4|m.41973/c110428_g2_i1|m.86954/c105930_g2_i1|m.56817/c46858_g1_i1|m.5055	17
GO:0051176	positive regulation of sulfur metabolic process	24/3804	112/43701	2.93933e-05	0.000422879	0.000376089	c108175_g4_i1|m.70621/c148853_g1_i1|m.99390/c39930_g1_i1|m.4222/c175676_g1_i1|m.102054/c65162_g1_i1|m.7023/c105245_g12_i1|m.53306/c107464_g5_i1|m.65802/c75972_g1_i1|m.10328/c107464_g7_i1|m.65807/c107464_g2_i1|m.65801/c109563_g2_i1|m.80388/c109774_g1_i8|m.81825/c109774_g1_i1|m.81817/c109774_g1_i10|m.81827/c109563_g2_i11|m.80402/c109563_g2_i10|m.80401/c109563_g2_i4|m.80393/c106807_g1_i1|m.61726/c10…	24
GO:0055117	regulation of cardiac muscle contraction	14/3804	47/43701	3.01183e-05	0.000431762	0.000383989	c101230_g2_i3|m.37065/c110875_g1_i3|m.90985/c101230_g3_i2|m.37056/c109550_g1_i7|m.80269/c110926_g1_i6|m.91441/c110926_g1_i4|m.91437/c105922_g3_i1|m.56788/c110731_g1_i6|m.89644/c107738_g1_i1|m.67664/c107738_g1_i4|m.67668/c140384_g1_i1|m.98628/c41934_g1_i1|m.4629/c2238_g2_i1|m.119/c69874_g1_i1|m.8364	14
GO:0065001	specification of axis polarity	33/3804	179/43701	3.01743e-05	0.000431762	0.000383989	c123324_g1_i1|m.96984/c73376_g1_i1|m.9813/c98004_g2_i1|m.28460/c105531_g4_i1|m.54790/c100431_g1_i1|m.34834/c109916_g1_i5|m.82933/c109916_g1_i4|m.82931/c109916_g1_i1|m.82919/c107529_g2_i1|m.66180/c111243_g2_i1|m.94168/c111243_g2_i2|m.94170/c81641_g1_i1|m.11915/c89991_g1_i1|m.16952/c95692_g2_i1|m.23817/c103418_g4_i4|m.45024/c104139_g3_i1|m.48038/c104139_g3_i2|m.48039/c105177_g1_i5|m.52954/c111379_g…	33
GO:0010268	brassinosteroid homeostasis	34/3804	187/43701	3.10509e-05	0.000443105	0.000394077	c98004_g5_i1|m.28465/c13355_g1_i1|m.1308/c109916_g2_i6|m.82935/c109916_g2_i2|m.82923/c109916_g2_i3|m.82928/c107529_g3_i1|m.66181/c101109_g1_i1|m.36687/c85263_g1_i1|m.13782/c85263_g2_i1|m.13783/c81641_g1_i1|m.11915/c100939_g1_i2|m.36240/c106047_g12_i1|m.57335/c106047_g12_i4|m.57338/c106047_g12_i2|m.57336/c107187_g1_i2|m.63916/c91962_g1_i1|m.18805/c61851_g2_i1|m.6188/c100573_g1_i1|m.35193/c101701_g…	34
GO:0009625	response to insect	20/3804	85/43701	3.23382e-05	0.000460231	0.000409308	c108175_g4_i1|m.70621/c105245_g12_i1|m.53306/c107464_g5_i1|m.65802/c75972_g1_i1|m.10328/c107464_g7_i1|m.65807/c107464_g2_i1|m.65801/c109563_g2_i1|m.80388/c109774_g1_i8|m.81825/c109774_g1_i1|m.81817/c109774_g1_i10|m.81827/c109563_g2_i11|m.80402/c109563_g2_i10|m.80401/c109563_g2_i4|m.80393/c106807_g1_i1|m.61726/c107361_g1_i3|m.65119/c108175_g4_i4|m.70624/c109214_g2_i3|m.77806/c109214_g5_i1|m.77807/…	20
GO:0034330	cell junction organization	32/3804	172/43701	3.27759e-05	0.000465206	0.000413733	c101230_g2_i3|m.37065/c110875_g1_i3|m.90985/c109550_g1_i7|m.80269/c110926_g1_i4|m.91437/c105922_g3_i1|m.56788/c109536_g2_i4|m.80076/c110731_g1_i6|m.89644/c107738_g1_i4|m.67668/c111090_g1_i1|m.92876/c106561_g1_i1|m.60221/c110876_g2_i4|m.91004/c109369_g2_i1|m.78832/c109141_g4_i2|m.77327/c70800_g1_i2|m.8707/c76736_g2_i1|m.10533/c111246_g1_i4|m.94192/c106262_g1_i2|m.58648/c111251_g1_i1|m.94217/c10933…	32
GO:0015706	nitrate transport	28/3804	142/43701	3.37545e-05	0.000476709	0.000423963	c73376_g1_i1|m.9813/c110767_g1_i2|m.89970/c85263_g1_i1|m.13782/c100651_g1_i2|m.35407/c100939_g1_i1|m.36239/c100939_g1_i2|m.36240/c109950_g2_i5|m.83198/c109950_g2_i1|m.83191/c109950_g2_i2|m.83192/c105380_g1_i1|m.54055/c110744_g4_i1|m.89747/c110744_g3_i1|m.89742/c110053_g4_i1|m.84022/c110053_g5_i1|m.84024/c91215_g2_i1|m.18153/c95597_g2_i1|m.23587/c85577_g1_i1|m.13914/c107055_g9_i2|m.63120/c110587_g…	28
GO:1902290	positive regulation of defense response to oomycetes	21/3804	92/43701	3.37669e-05	0.000476709	0.000423963	c107470_g3_i6|m.65857/c84898_g1_i1|m.13616/c110731_g2_i1|m.89636/c106023_g1_i1|m.57225/c108175_g4_i1|m.70621/c105245_g12_i1|m.53306/c107464_g5_i1|m.65802/c75972_g1_i1|m.10328/c107464_g7_i1|m.65807/c109563_g2_i1|m.80388/c109774_g1_i1|m.81817/c109774_g1_i10|m.81827/c109563_g2_i11|m.80402/c109563_g2_i10|m.80401/c109563_g2_i4|m.80393/c106807_g1_i1|m.61726/c107361_g1_i3|m.65119/c108175_g4_i4|m.70624/c…	21
GO:1900378	positive regulation of secondary metabolite biosynthetic process	24/3804	113/43701	3.42675e-05	0.000482486	0.000429101	c108175_g4_i1|m.70621/c148853_g1_i1|m.99390/c39930_g1_i1|m.4222/c175676_g1_i1|m.102054/c65162_g1_i1|m.7023/c105245_g12_i1|m.53306/c107464_g5_i1|m.65802/c75972_g1_i1|m.10328/c107464_g7_i1|m.65807/c107464_g2_i1|m.65801/c109563_g2_i1|m.80388/c109774_g1_i8|m.81825/c109774_g1_i1|m.81817/c109774_g1_i10|m.81827/c109563_g2_i11|m.80402/c109563_g2_i10|m.80401/c109563_g2_i4|m.80393/c106807_g1_i1|m.61726/c10…	24
GO:0007124	pseudohyphal growth	11/3804	31/43701	3.49479e-05	0.000489456	0.0004353	c82167_g1_i1|m.12143/c93910_g1_i1|m.20801/c85947_g1_i1|m.14251/c103418_g4_i4|m.45024/c163418_g1_i1|m.100927/c99196_g1_i1|m.31537/c73312_g2_i1|m.9783/c11731_g1_i1|m.1043/c20707_g1_i1|m.2306/c76798_g1_i1|m.10570/c82736_g1_i1|m.12475	11
GO:0055008	cardiac muscle tissue morphogenesis	11/3804	31/43701	3.49479e-05	0.000489456	0.0004353	c105922_g1_i1|m.56783/c72524_g3_i1|m.9634/c36762_g1_i1|m.3884/c60241_g1_i1|m.5980/c24515_g1_i1|m.2633/c162075_g1_i1|m.100681/c153397_g1_i1|m.99927/c131658_g1_i1|m.97629/c153413_g1_i1|m.99932/c174246_g1_i1|m.101760/c41491_g2_i1|m.4550	11
GO:0043139	5'-3' DNA helicase activity	19/3804	79/43701	3.64803e-05	0.000509567	0.000453185	c110930_g1_i2|m.91466/c111349_g1_i1|m.94968/c106303_g6_i1|m.58801/c106303_g6_i7|m.58806/c60947_g1_i1|m.6037/c105885_g2_i1|m.56583/c82703_g1_i1|m.12456/c105885_g2_i1|m.56584/c80545_g2_i1|m.11667/c111161_g2_i1|m.93500/c76564_g3_i1|m.10483/c74991_g1_i1|m.10091/c103388_g16_i1|m.44820/c103679_g3_i4|m.46161/c103679_g3_i1|m.46158/c105091_g1_i2|m.52494/c135278_g1_i1|m.98017/c108341_g2_i1|m.71798/c96785_g…	19
GO:2000021	regulation of ion homeostasis	30/3804	158/43701	3.82615e-05	0.000533036	0.000474058	c101230_g2_i3|m.37065/c104914_g5_i2|m.51528/c110875_g1_i3|m.90985/c90107_g1_i1|m.17049/c101230_g3_i2|m.37056/c110408_g2_i1|m.86753/c109550_g1_i7|m.80269/c101007_g1_i1|m.36407/c108589_g1_i1|m.73594/c110926_g1_i1|m.91432/c105922_g2_i1|m.56787/c110926_g1_i6|m.91441/c110926_g1_i4|m.91437/c107470_g3_i2|m.65850/c105922_g3_i1|m.56788/c110926_g2_i2|m.91440/c110926_g2_i1|m.91434/c62392_g1_i1|m.6368/c11095…	30
GO:0072358	cardiovascular system development	70/3804	495/43701	3.9952e-05	0.000555123	0.000493701	c109691_g4_i1|m.81176/c123324_g1_i1|m.96984/c73376_g1_i1|m.9813/c111169_g3_i1|m.93563/c108685_g4_i2|m.74190/c98004_g2_i1|m.28460/c105531_g4_i1|m.54790/c59668_g1_i1|m.5864/c104298_g4_i1|m.48781/c104298_g3_i1|m.48780/c27213_g1_i1|m.2893/c66462_g1_i1|m.7378/c97669_g2_i1|m.27725/c100431_g1_i1|m.34834/c109916_g1_i5|m.82933/c109916_g1_i4|m.82931/c109916_g1_i1|m.82919/c107529_g2_i1|m.66180/c111243_g2_i1…	70
GO:1902288	regulation of defense response to oomycetes	21/3804	93/43701	4.00674e-05	0.000555265	0.000493827	c107470_g3_i6|m.65857/c84898_g1_i1|m.13616/c110731_g2_i1|m.89636/c106023_g1_i1|m.57225/c108175_g4_i1|m.70621/c105245_g12_i1|m.53306/c107464_g5_i1|m.65802/c75972_g1_i1|m.10328/c107464_g7_i1|m.65807/c109563_g2_i1|m.80388/c109774_g1_i1|m.81817/c109774_g1_i10|m.81827/c109563_g2_i11|m.80402/c109563_g2_i10|m.80401/c109563_g2_i4|m.80393/c106807_g1_i1|m.61726/c107361_g1_i3|m.65119/c108175_g4_i4|m.70624/c…	21
GO:0048663	neuron fate commitment	17/3804	67/43701	4.45191e-05	0.000615343	0.000547258	c109691_g4_i1|m.81176/c109536_g2_i4|m.80076/c111090_g1_i1|m.92876/c106561_g1_i1|m.60221/c110876_g2_i4|m.91004/c109369_g2_i1|m.78832/c109141_g4_i2|m.77327/c76736_g2_i1|m.10533/c111246_g1_i4|m.94192/c111251_g1_i1|m.94217/c109336_g2_i2|m.78590/c110699_g3_i1|m.89418/c59668_g1_i1|m.5864/c110876_g2_i2|m.91002/c102673_g2_i4|m.41973/c110428_g2_i1|m.86954/c105930_g2_i1|m.56817	17
GO:0034644	cellular response to UV	41/3804	247/43701	4.70202e-05	0.000648216	0.000576493	c105241_g10_i2|m.53270/c105241_g4_i1|m.53264/c109590_g3_i3|m.80590/c77336_g2_i1|m.10732/c13129_g2_i1|m.1262/c69753_g1_i1|m.8316/c109141_g4_i4|m.77332/c105668_g6_i1|m.55387/c107314_g1_i1|m.64815/c109372_g3_i1|m.78873/c169026_g1_i1|m.101455/c22275_g1_i1|m.2385/c107987_g1_i1|m.69419/c110946_g1_i3|m.91594/c110263_g4_i2|m.85691/c107500_g3_i2|m.66069/c83090_g2_i1|m.12695/c110885_g3_i1|m.91060/c100962_g…	41
GO:0060415	muscle tissue morphogenesis	11/3804	32/43701	4.90714e-05	0.000674731	0.000600075	c105922_g1_i1|m.56783/c72524_g3_i1|m.9634/c36762_g1_i1|m.3884/c60241_g1_i1|m.5980/c24515_g1_i1|m.2633/c162075_g1_i1|m.100681/c153397_g1_i1|m.99927/c131658_g1_i1|m.97629/c153413_g1_i1|m.99932/c174246_g1_i1|m.101760/c41491_g2_i1|m.4550	11
GO:0090406	pollen tube	52/3804	340/43701	4.96252e-05	0.000680575	0.000605272	c109845_g4_i1|m.82374/c108685_g4_i2|m.74190/c98004_g1_i1|m.28459/c101332_g5_i1|m.37410/c104098_g2_i5|m.47870/c108697_g1_i1|m.74263/c109841_g6_i1|m.82328/c17960_g1_i1|m.1884/c104298_g4_i1|m.48781/c104298_g3_i1|m.48780/c109916_g1_i1|m.82919/c109688_g3_i6|m.81160/c100651_g1_i1|m.35405/c100651_g1_i2|m.35407/c104457_g4_i1|m.49414/c105853_g2_i6|m.56414/c106489_g2_i1|m.59786/c106489_g2_i2|m.59787/c14738…	52
GO:0045169	fusome	15/3804	55/43701	4.99648e-05	0.000682425	0.000606917	c109536_g2_i4|m.80076/c111090_g1_i1|m.92876/c106561_g1_i1|m.60221/c110876_g2_i4|m.91004/c109369_g2_i1|m.78832/c109141_g4_i2|m.77327/c76736_g2_i1|m.10533/c111246_g1_i4|m.94192/c111251_g1_i1|m.94217/c109336_g2_i2|m.78590/c110699_g3_i1|m.89418/c110876_g2_i2|m.91002/c102673_g2_i4|m.41973/c110428_g2_i1|m.86954/c105930_g2_i1|m.56817	15
GO:0009875	pollen-pistil interaction	50/3804	323/43701	5.00186e-05	0.000682425	0.000606917	c105315_g1_i3|m.53711/c66266_g1_i1|m.7288/c91794_g1_i1|m.18669/c111189_g2_i1|m.93788/c105964_g1_i1|m.57006/c107381_g1_i1|m.65261/c96357_g1_i1|m.24886/c86837_g2_i1|m.14956/c106894_g3_i1|m.62282/c110873_g1_i1|m.90965/c93280_g1_i1|m.20091/c97651_g1_i1|m.27689/c109343_g2_i2|m.78632/c109343_g2_i1|m.78625/c109343_g2_i3|m.78633/c109343_g3_i1|m.78628/c110943_g4_i1|m.91584/c62772_g1_i1|m.6470/c92858_g2_i1…	50
GO:0010065	primary meristem tissue development	31/3804	168/43701	5.07538e-05	0.000690671	0.000614251	c111169_g3_i1|m.93563/c108685_g4_i2|m.74190/c104298_g4_i1|m.48781/c104298_g3_i1|m.48780/c111243_g2_i1|m.94168/c111243_g2_i2|m.94170/c109688_g3_i6|m.81160/c107529_g3_i1|m.66182/c100651_g1_i1|m.35405/c100651_g1_i2|m.35407/c105380_g1_i1|m.54055/c110744_g4_i1|m.89747/c110744_g3_i1|m.89742/c111270_g2_i1|m.94344/c109183_g3_i1|m.77645/c109183_g6_i1|m.77650/c110053_g4_i1|m.84022/c110053_g5_i1|m.84024/c91…	31
GO:0071497	cellular response to freezing	10/3804	27/43701	5.19463e-05	0.000705081	0.000627066	c107128_g1_i7|m.63566/c107128_g1_i9|m.63570/c105358_g1_i1|m.53918/c98879_g1_i3|m.30683/c107127_g4_i1|m.63550/c98144_g2_i1|m.28789/c100166_g1_i1|m.34077/c102833_g2_i2|m.42530/c70829_g1_i1|m.8716/c70829_g1_i2|m.8718	10
GO:0050691	regulation of defense response to virus by host	24/3804	116/43701	5.35512e-05	0.000725001	0.000644782	c100634_g2_i2|m.35351/c96406_g1_i1|m.24989/c170194_g1_i1|m.101495/c62898_g1_i1|m.6498/c106509_g3_i1|m.59952/c105978_g5_i1|m.57084/c109349_g2_i4|m.78707/c108175_g4_i1|m.70621/c105245_g12_i1|m.53306/c107464_g5_i1|m.65802/c75972_g1_i1|m.10328/c107464_g7_i1|m.65807/c109563_g2_i1|m.80388/c109774_g1_i1|m.81817/c109774_g1_i10|m.81827/c109768_g9_i2|m.81784/c109563_g2_i11|m.80402/c109563_g2_i10|m.80401/c1…	24
GO:0045216	cell-cell junction organization	31/3804	169/43701	5.70344e-05	0.000770183	0.000684965	c101230_g2_i3|m.37065/c110875_g1_i3|m.90985/c109550_g1_i7|m.80269/c110926_g1_i4|m.91437/c105922_g3_i1|m.56788/c109536_g2_i4|m.80076/c110731_g1_i6|m.89644/c107738_g1_i4|m.67668/c111090_g1_i1|m.92876/c106561_g1_i1|m.60221/c110876_g2_i4|m.91004/c109369_g2_i1|m.78832/c109141_g4_i2|m.77327/c70800_g1_i2|m.8707/c76736_g2_i1|m.10533/c111246_g1_i4|m.94192/c106262_g1_i2|m.58648/c111251_g1_i1|m.94217/c10933…	31
GO:0010880	regulation of release of sequestered calcium ion into cytosol by sarcoplasmic reticulum	13/3804	44/43701	6.3287e-05	0.00084811	0.00075427	c101230_g2_i3|m.37065/c110875_g1_i3|m.90985/c101230_g3_i2|m.37056/c109550_g1_i7|m.80269/c110926_g1_i6|m.91441/c110926_g1_i4|m.91437/c105922_g3_i1|m.56788/c110731_g1_i6|m.89644/c107738_g1_i1|m.67664/c107738_g1_i4|m.67668/c61719_g2_i1|m.6146/c140384_g1_i1|m.98628/c41934_g1_i1|m.4629	13
GO:0014808	release of sequestered calcium ion into cytosol by sarcoplasmic reticulum	13/3804	44/43701	6.3287e-05	0.00084811	0.00075427	c101230_g2_i3|m.37065/c110875_g1_i3|m.90985/c101230_g3_i2|m.37056/c109550_g1_i7|m.80269/c110926_g1_i6|m.91441/c110926_g1_i4|m.91437/c105922_g3_i1|m.56788/c110731_g1_i6|m.89644/c107738_g1_i1|m.67664/c107738_g1_i4|m.67668/c61719_g2_i1|m.6146/c140384_g1_i1|m.98628/c41934_g1_i1|m.4629	13
GO:1903514	calcium ion transport from endoplasmic reticulum to cytosol	13/3804	44/43701	6.3287e-05	0.00084811	0.00075427	c101230_g2_i3|m.37065/c110875_g1_i3|m.90985/c101230_g3_i2|m.37056/c109550_g1_i7|m.80269/c110926_g1_i6|m.91441/c110926_g1_i4|m.91437/c105922_g3_i1|m.56788/c110731_g1_i6|m.89644/c107738_g1_i1|m.67664/c107738_g1_i4|m.67668/c61719_g2_i1|m.6146/c140384_g1_i1|m.98628/c41934_g1_i1|m.4629	13
GO:2000022	regulation of jasmonic acid mediated signaling pathway	28/3804	147/43701	6.42914e-05	0.000859389	0.000764301	c110575_g1_i14|m.88242/c110575_g1_i22|m.88249/c110575_g1_i23|m.88250/c82345_g1_i1|m.12255/c108175_g4_i1|m.70621/c105245_g12_i1|m.53306/c107464_g5_i1|m.65802/c75972_g1_i1|m.10328/c107464_g7_i1|m.65807/c107464_g2_i1|m.65801/c109563_g2_i1|m.80388/c109774_g1_i8|m.81825/c109774_g1_i1|m.81817/c109774_g1_i10|m.81827/c109563_g2_i11|m.80402/c109563_g2_i10|m.80401/c109563_g2_i4|m.80393/c106807_g1_i1|m.6172…	28
GO:0043297	apical junction assembly	17/3804	69/43701	6.65892e-05	0.000887856	0.000789618	c109536_g2_i4|m.80076/c111090_g1_i1|m.92876/c106561_g1_i1|m.60221/c110876_g2_i4|m.91004/c109369_g2_i1|m.78832/c109141_g4_i2|m.77327/c76736_g2_i1|m.10533/c111246_g1_i4|m.94192/c111251_g1_i1|m.94217/c109336_g2_i2|m.78590/c110699_g3_i1|m.89418/c110876_g2_i2|m.91002/c102673_g2_i4|m.41973/c110428_g2_i1|m.86954/c105930_g2_i1|m.56817/c140384_g1_i1|m.98628/c41934_g1_i1|m.4629	17
GO:0008307	structural constituent of muscle	11/3804	33/43701	6.78302e-05	0.000899858	0.000800292	c8278_g1_i2|m.642/c36762_g1_i1|m.3884/c180099_g1_i1|m.102614/c63845_g2_i1|m.6737/c60241_g1_i1|m.5980/c24515_g1_i1|m.2633/c46265_g1_i1|m.5024/c131658_g1_i1|m.97629/c153413_g1_i1|m.99932/c174246_g1_i1|m.101760/c41491_g2_i1|m.4550	11
GO:0048644	muscle organ morphogenesis	11/3804	33/43701	6.78302e-05	0.000899858	0.000800292	c105922_g1_i1|m.56783/c72524_g3_i1|m.9634/c36762_g1_i1|m.3884/c60241_g1_i1|m.5980/c24515_g1_i1|m.2633/c162075_g1_i1|m.100681/c153397_g1_i1|m.99927/c131658_g1_i1|m.97629/c153413_g1_i1|m.99932/c174246_g1_i1|m.101760/c41491_g2_i1|m.4550	11
GO:0007117	budding cell bud growth	7/3804	14/43701	7.45024e-05	0.000983432	0.000874619	c185948_g1_i1|m.102930/c82167_g1_i1|m.12143/c93910_g1_i1|m.20801/c85947_g1_i1|m.14251/c127810_g1_i1|m.97419/c62195_g3_i1|m.6306/c134240_g1_i1|m.97758	7
GO:0097371	MDM2/MDM4 family protein binding	7/3804	14/43701	7.45024e-05	0.000983432	0.000874619	c102507_g1_i3|m.41360/c102507_g1_i4|m.41361/c108812_g3_i2|m.75039/c32709_g1_i1|m.3646/c103318_g1_i1|m.44478/c89915_g1_i1|m.16889/c54597_g1_i1|m.5558	7
GO:1901019	regulation of calcium ion transmembrane transporter activity	14/3804	51/43701	8.17384e-05	0.00107621	0.000957132	c101230_g2_i3|m.37065/c110875_g1_i3|m.90985/c101230_g3_i2|m.37056/c109550_g1_i7|m.80269/c110926_g1_i6|m.91441/c110926_g1_i4|m.91437/c105922_g3_i1|m.56788/c111174_g4_i2|m.93623/c110731_g1_i6|m.89644/c107738_g1_i1|m.67664/c107738_g1_i4|m.67668/c61719_g2_i1|m.6146/c140384_g1_i1|m.98628/c41934_g1_i1|m.4629	14
GO:0070296	sarcoplasmic reticulum calcium ion transport	13/3804	45/43701	8.19387e-05	0.00107621	0.000957132	c101230_g2_i3|m.37065/c110875_g1_i3|m.90985/c101230_g3_i2|m.37056/c109550_g1_i7|m.80269/c110926_g1_i6|m.91441/c110926_g1_i4|m.91437/c105922_g3_i1|m.56788/c110731_g1_i6|m.89644/c107738_g1_i1|m.67664/c107738_g1_i4|m.67668/c61719_g2_i1|m.6146/c140384_g1_i1|m.98628/c41934_g1_i1|m.4629	13
GO:0009697	salicylic acid biosynthetic process	25/3804	127/43701	8.91433e-05	0.00116793	0.0010387	c108175_g4_i1|m.70621/c105245_g12_i1|m.53306/c107464_g5_i1|m.65802/c75972_g1_i1|m.10328/c107464_g7_i1|m.65807/c107464_g2_i1|m.65801/c109563_g2_i1|m.80388/c109774_g1_i8|m.81825/c109774_g1_i1|m.81817/c109774_g1_i10|m.81827/c109563_g2_i11|m.80402/c109563_g2_i10|m.80401/c109563_g2_i4|m.80393/c106807_g1_i1|m.61726/c107361_g1_i3|m.65119/c108175_g4_i4|m.70624/c109214_g2_i3|m.77806/c109214_g5_i1|m.77807/…	25
GO:0047213	anthocyanidin 3-O-glucosyltransferase activity	11/3804	34/43701	9.24072e-05	0.0012077	0.00107407	c102313_g1_i1|m.40704/c102313_g1_i2|m.40706/c110635_g1_i1|m.88813/c90929_g1_i1|m.17855/c102440_g3_i3|m.41192/c102440_g3_i2|m.41191/c109900_g1_i1|m.82789/c105756_g1_i1|m.55878/c24214_g2_i1|m.2589/c107507_g1_i1|m.66104/c107507_g1_i3|m.66105	11
GO:0061162	establishment of monopolar cell polarity	15/3804	58/43701	9.72866e-05	0.00126521	0.00112522	c109536_g2_i4|m.80076/c111090_g1_i1|m.92876/c106561_g1_i1|m.60221/c110876_g2_i4|m.91004/c109369_g2_i1|m.78832/c109141_g4_i2|m.77327/c76736_g2_i1|m.10533/c111246_g1_i4|m.94192/c111251_g1_i1|m.94217/c109336_g2_i2|m.78590/c110699_g3_i1|m.89418/c110876_g2_i2|m.91002/c102673_g2_i4|m.41973/c110428_g2_i1|m.86954/c105930_g2_i1|m.56817	15
GO:0061339	establishment or maintenance of monopolar cell polarity	15/3804	58/43701	9.72866e-05	0.00126521	0.00112522	c109536_g2_i4|m.80076/c111090_g1_i1|m.92876/c106561_g1_i1|m.60221/c110876_g2_i4|m.91004/c109369_g2_i1|m.78832/c109141_g4_i2|m.77327/c76736_g2_i1|m.10533/c111246_g1_i4|m.94192/c111251_g1_i1|m.94217/c109336_g2_i2|m.78590/c110699_g3_i1|m.89418/c110876_g2_i2|m.91002/c102673_g2_i4|m.41973/c110428_g2_i1|m.86954/c105930_g2_i1|m.56817	15
GO:0050826	response to freezing	17/3804	71/43701	9.77748e-05	0.00126843	0.00112808	c107470_g3_i6|m.65857/c84898_g1_i1|m.13616/c110731_g2_i1|m.89636/c106023_g1_i1|m.57225/c107128_g1_i7|m.63566/c107128_g1_i9|m.63570/c105358_g1_i1|m.53918/c98879_g1_i3|m.30683/c107127_g4_i1|m.63550/c110266_g5_i1|m.85714/c98144_g2_i1|m.28789/c100166_g1_i1|m.34077/c102833_g2_i2|m.42530/c60192_g1_i1|m.5967/c72467_g2_i1|m.9587/c70829_g1_i1|m.8716/c70829_g1_i2|m.8718	17
GO:0043271	negative regulation of ion transport	25/3804	128/43701	0.000101725	0.00131343	0.0011681	c104914_g5_i2|m.51528/c110875_g1_i3|m.90985/c90107_g1_i1|m.17049/c101230_g3_i2|m.37056/c110408_g2_i1|m.86753/c101007_g1_i1|m.36407/c108589_g1_i1|m.73594/c110926_g1_i1|m.91432/c105922_g2_i1|m.56787/c110926_g1_i4|m.91437/c107470_g3_i2|m.65850/c105922_g3_i1|m.56788/c110926_g2_i2|m.91440/c110926_g2_i1|m.91434/c62392_g1_i1|m.6368/c110957_g10_i2|m.91664/c111005_g1_i6|m.92127/c110731_g1_i6|m.89644/c7470…	25
GO:0010881	regulation of cardiac muscle contraction by regulation of the release of sequestered calcium ion	12/3804	40/43701	0.000102238	0.00131343	0.0011681	c101230_g2_i3|m.37065/c110875_g1_i3|m.90985/c101230_g3_i2|m.37056/c109550_g1_i7|m.80269/c110926_g1_i6|m.91441/c110926_g1_i4|m.91437/c105922_g3_i1|m.56788/c110731_g1_i6|m.89644/c107738_g1_i1|m.67664/c107738_g1_i4|m.67668/c140384_g1_i1|m.98628/c41934_g1_i1|m.4629	12
GO:0010882	regulation of cardiac muscle contraction by calcium ion signaling	12/3804	40/43701	0.000102238	0.00131343	0.0011681	c101230_g2_i3|m.37065/c110875_g1_i3|m.90985/c101230_g3_i2|m.37056/c109550_g1_i7|m.80269/c110926_g1_i6|m.91441/c110926_g1_i4|m.91437/c105922_g3_i1|m.56788/c110731_g1_i6|m.89644/c107738_g1_i1|m.67664/c107738_g1_i4|m.67668/c140384_g1_i1|m.98628/c41934_g1_i1|m.4629	12
GO:0033644	host cell membrane	12/3804	40/43701	0.000102238	0.00131343	0.0011681	c106627_g5_i1|m.60652/c137846_g1_i1|m.98382/c90961_g1_i2|m.17881/c108152_g10_i1|m.70467/c110988_g1_i1|m.91949/c72399_g1_i1|m.9555/c111357_g1_i2|m.95042/c134633_g1_i1|m.97840/c96109_g1_i1|m.24532/c99963_g5_i1|m.33435/c110093_g2_i2|m.84318/c39106_g1_i1|m.4099	12
GO:0005753	mitochondrial proton-transporting ATP synthase complex	9/3804	24/43701	0.00011056	0.00141688	0.00126011	c12978_g1_i1|m.1231/c13157_g1_i1|m.1270/c7695_g1_i1|m.549/c155575_g1_i1|m.100111/c85648_g1_i1|m.13991/c174266_g1_i1|m.101766/c134463_g1_i1|m.97797/c137966_g1_i1|m.98398/c76511_g1_i1|m.10469	9
GO:0030048	actin filament-based movement	25/3804	129/43701	0.000115867	0.00148131	0.00131741	c101230_g2_i3|m.37065/c110875_g1_i3|m.90985/c101230_g3_i2|m.37056/c109550_g1_i7|m.80269/c110926_g1_i6|m.91441/c110926_g1_i4|m.91437/c105922_g3_i1|m.56788/c110731_g1_i6|m.89644/c107738_g1_i1|m.67664/c107738_g1_i4|m.67668/c15104_g1_i1|m.1551/c72524_g3_i1|m.9634/c36762_g1_i1|m.3884/c180099_g1_i1|m.102614/c63845_g2_i1|m.6737/c60241_g1_i1|m.5980/c24515_g1_i1|m.2633/c162075_g1_i1|m.100681/c105010_g2_i2…	25
GO:0003229	ventricular cardiac muscle tissue development	7/3804	15/43701	0.00012917	0.00164342	0.00146158	c72524_g3_i1|m.9634/c36762_g1_i1|m.3884/c60241_g1_i1|m.5980/c24515_g1_i1|m.2633/c162075_g1_i1|m.100681/c153397_g1_i1|m.99927/c153413_g1_i1|m.99932	7
GO:0055010	ventricular cardiac muscle tissue morphogenesis	7/3804	15/43701	0.00012917	0.00164342	0.00146158	c72524_g3_i1|m.9634/c36762_g1_i1|m.3884/c60241_g1_i1|m.5980/c24515_g1_i1|m.2633/c162075_g1_i1|m.100681/c153397_g1_i1|m.99927/c153413_g1_i1|m.99932	7
GO:1903115	regulation of actin filament-based movement	13/3804	47/43701	0.000133858	0.00169897	0.00151099	c101230_g2_i3|m.37065/c110875_g1_i3|m.90985/c101230_g3_i2|m.37056/c109550_g1_i7|m.80269/c110926_g1_i6|m.91441/c110926_g1_i4|m.91437/c105922_g3_i1|m.56788/c110731_g1_i6|m.89644/c107738_g1_i1|m.67664/c107738_g1_i4|m.67668/c153397_g1_i1|m.99927/c131658_g1_i1|m.97629/c153413_g1_i1|m.99932	13
GO:0005200	structural constituent of cytoskeleton	32/3804	185/43701	0.000138818	0.0017577	0.00156322	c101230_g2_i3|m.37065/c110875_g1_i3|m.90985/c90107_g1_i1|m.17049/c101230_g3_i2|m.37056/c110408_g2_i1|m.86753/c109550_g1_i7|m.80269/c101007_g1_i1|m.36407/c108589_g1_i1|m.73594/c110926_g1_i1|m.91432/c105922_g2_i1|m.56787/c110926_g1_i4|m.91437/c105922_g3_i1|m.56788/c110926_g2_i2|m.91440/c110926_g2_i1|m.91434/c62392_g1_i1|m.6368/c110957_g10_i2|m.91664/c110731_g1_i3|m.89639/c110731_g1_i4|m.89640/c1107…	32
GO:0034333	adherens junction assembly	20/3804	94/43701	0.000145397	0.00183659	0.00163338	c109536_g2_i4|m.80076/c111090_g1_i1|m.92876/c106561_g1_i1|m.60221/c110876_g2_i4|m.91004/c109369_g2_i1|m.78832/c109141_g4_i2|m.77327/c76736_g2_i1|m.10533/c111246_g1_i4|m.94192/c111251_g1_i1|m.94217/c109336_g2_i2|m.78590/c110699_g3_i1|m.89418/c110876_g2_i2|m.91002/c102673_g2_i4|m.41973/c110428_g2_i1|m.86954/c105930_g2_i1|m.56817/c108469_g4_i1|m.72706/c110223_g2_i5|m.85316/c110223_g2_i9|m.85322/c468…	20
GO:0007163	establishment or maintenance of cell polarity	51/3804	346/43701	0.00015005	0.00189084	0.00168163	c101230_g2_i3|m.37065/c110875_g1_i3|m.90985/c90107_g1_i1|m.17049/c110926_g2_i2|m.91440/c110926_g2_i1|m.91434/c62392_g1_i1|m.6368/c109536_g2_i4|m.80076/c110731_g1_i3|m.89639/c110731_g1_i4|m.89640/c107738_g1_i1|m.67664/c107738_g1_i4|m.67668/c110257_g2_i5|m.85658/c110257_g2_i11|m.85666/c111090_g1_i1|m.92876/c106561_g1_i1|m.60221/c110876_g2_i4|m.91004/c109369_g2_i1|m.78832/c109141_g4_i2|m.77327/c1081…	51
GO:0072659	protein localization to plasma membrane	42/3804	269/43701	0.000157538	0.00198048	0.00176135	c101230_g2_i3|m.37065/c111115_g3_i3|m.93122/c111115_g3_i7|m.93141/c104484_g2_i8|m.49566/c104484_g2_i6|m.49556/c104914_g5_i2|m.51528/c110875_g1_i3|m.90985/c124789_g1_i1|m.97139/c90107_g1_i1|m.17049/c101230_g3_i2|m.37056/c110408_g2_i1|m.86753/c109550_g1_i7|m.80269/c109691_g1_i1|m.81172/c101007_g1_i1|m.36407/c108589_g1_i1|m.73594/c110926_g1_i1|m.91432/c105922_g2_i1|m.56787/c110926_g1_i6|m.91441/c110…	42
GO:0060320	rejection of self pollen	8/3804	20/43701	0.000158147	0.00198341	0.00176395	c66266_g1_i1|m.7288/c109343_g2_i2|m.78632/c109343_g2_i1|m.78625/c109343_g3_i1|m.78628/c99641_g2_i1|m.32532/c99641_g2_i2|m.32533/c111033_g1_i2|m.92365/c111033_g3_i3|m.92370	8
GO:0050275	scopoletin glucosyltransferase activity	13/3804	48/43701	0.000169044	0.00211505	0.00188103	c106277_g1_i1|m.58707/c111109_g1_i4|m.93081/c110030_g2_i2|m.83820/c106552_g1_i3|m.60172/c106552_g1_i6|m.60178/c106552_g1_i8|m.60181/c106341_g1_i1|m.59031/c106341_g1_i2|m.59033/c107507_g1_i3|m.66105/c109521_g1_i3|m.79956/c109521_g3_i1|m.79954/c98717_g2_i1|m.30169/c98717_g2_i2|m.30171	13
GO:0098794	postsynapse	41/3804	262/43701	0.000178125	0.00222341	0.0019774	c101230_g2_i3|m.37065/c104914_g5_i2|m.51528/c110875_g1_i3|m.90985/c90107_g1_i1|m.17049/c109691_g1_i2|m.81174/c101230_g3_i2|m.37056/c110408_g2_i1|m.86753/c109550_g1_i7|m.80269/c101007_g1_i1|m.36407/c108589_g1_i1|m.73594/c110926_g1_i1|m.91432/c105922_g2_i1|m.56787/c110926_g1_i6|m.91441/c110926_g1_i4|m.91437/c107470_g3_i2|m.65850/c105922_g3_i1|m.56788/c110926_g2_i2|m.91440/c110926_g2_i1|m.91434/c623…	41
GO:1904062	regulation of cation transmembrane transport	31/3804	180/43701	0.000189538	0.00236028	0.00209913	c101230_g2_i3|m.37065/c104914_g5_i2|m.51528/c110875_g1_i3|m.90985/c90107_g1_i1|m.17049/c101230_g3_i2|m.37056/c110408_g2_i1|m.86753/c109550_g1_i7|m.80269/c101007_g1_i1|m.36407/c108589_g1_i1|m.73594/c110926_g1_i1|m.91432/c105922_g2_i1|m.56787/c110926_g1_i6|m.91441/c110926_g1_i4|m.91437/c107470_g3_i2|m.65850/c105922_g3_i1|m.56788/c110926_g2_i2|m.91440/c110926_g2_i1|m.91434/c62392_g1_i1|m.6368/c11095…	31
GO:0007315	pole plasm assembly	16/3804	68/43701	0.000192937	0.00239696	0.00213174	c109536_g2_i4|m.80076/c111090_g1_i1|m.92876/c106561_g1_i1|m.60221/c110876_g2_i4|m.91004/c109369_g2_i1|m.78832/c109141_g4_i2|m.77327/c76736_g2_i1|m.10533/c111246_g1_i4|m.94192/c111251_g1_i1|m.94217/c109336_g2_i2|m.78590/c110699_g3_i1|m.89418/c110876_g2_i2|m.91002/c102673_g2_i4|m.41973/c110428_g2_i1|m.86954/c105930_g2_i1|m.56817/c140384_g1_i1|m.98628	16
GO:0034332	adherens junction organization	20/3804	96/43701	0.000196505	0.00243555	0.00216607	c109536_g2_i4|m.80076/c111090_g1_i1|m.92876/c106561_g1_i1|m.60221/c110876_g2_i4|m.91004/c109369_g2_i1|m.78832/c109141_g4_i2|m.77327/c76736_g2_i1|m.10533/c111246_g1_i4|m.94192/c111251_g1_i1|m.94217/c109336_g2_i2|m.78590/c110699_g3_i1|m.89418/c110876_g2_i2|m.91002/c102673_g2_i4|m.41973/c110428_g2_i1|m.86954/c105930_g2_i1|m.56817/c108469_g4_i1|m.72706/c110223_g2_i5|m.85316/c110223_g2_i9|m.85322/c468…	20
GO:0038180	nerve growth factor signaling pathway	10/3804	31/43701	0.000197513	0.00244231	0.00217208	c103773_g8_i2|m.46545/c109550_g1_i9|m.80276/c111025_g2_i8|m.92308/c101230_g3_i2|m.37056/c110408_g2_i1|m.86753/c109550_g1_i7|m.80269/c106908_g2_i1|m.62388/c98135_g2_i3|m.28780/c110606_g1_i5|m.88551/c35192_g2_i1|m.3753	10
GO:0008105	asymmetric protein localization	18/3804	82/43701	0.000202805	0.00250189	0.00222507	c109536_g2_i4|m.80076/c111090_g1_i1|m.92876/c106561_g1_i1|m.60221/c110876_g2_i4|m.91004/c109369_g2_i1|m.78832/c109141_g4_i2|m.77327/c160547_g1_i1|m.100294/c76736_g2_i1|m.10533/c111246_g1_i4|m.94192/c106262_g1_i2|m.58648/c111251_g1_i1|m.94217/c109336_g2_i2|m.78590/c110699_g3_i1|m.89418/c110876_g2_i2|m.91002/c102673_g2_i4|m.41973/c4159_g1_i1|m.350/c110428_g2_i1|m.86954/c105930_g2_i1|m.56817	18
GO:0009798	axis specification	53/3804	368/43701	0.000204074	0.00251168	0.00223377	c109536_g2_i4|m.80076/c111090_g1_i1|m.92876/c106561_g1_i1|m.60221/c110876_g2_i4|m.91004/c109369_g2_i1|m.78832/c109141_g4_i2|m.77327/c123324_g1_i1|m.96984/c73376_g1_i1|m.9813/c76736_g2_i1|m.10533/c111246_g1_i4|m.94192/c111251_g1_i1|m.94217/c98004_g2_i1|m.28460/c105531_g4_i1|m.54790/c109336_g2_i2|m.78590/c110699_g3_i1|m.89418/c100431_g1_i1|m.34834/c109916_g1_i5|m.82933/c109916_g1_i4|m.82931/c109916…	53
GO:0003208	cardiac ventricle morphogenesis	7/3804	16/43701	0.000212364	0.00259555	0.00230837	c72524_g3_i1|m.9634/c36762_g1_i1|m.3884/c60241_g1_i1|m.5980/c24515_g1_i1|m.2633/c162075_g1_i1|m.100681/c153397_g1_i1|m.99927/c153413_g1_i1|m.99932	7
GO:0014866	skeletal myofibril assembly	7/3804	16/43701	0.000212364	0.00259555	0.00230837	c109550_g2_i1|m.80257/c8278_g1_i2|m.642/c36762_g1_i1|m.3884/c184345_g1_i1|m.102895/c131658_g1_i1|m.97629/c174246_g1_i1|m.101760/c41491_g2_i1|m.4550	7
GO:0045263	proton-transporting ATP synthase complex, coupling factor F(o)	7/3804	16/43701	0.000212364	0.00259555	0.00230837	c12978_g1_i1|m.1231/c13157_g1_i1|m.1270/c7695_g1_i1|m.549/c155575_g1_i1|m.100111/c85648_g1_i1|m.13991/c174266_g1_i1|m.101766/c76511_g1_i1|m.10469	7
GO:0010286	heat acclimation	37/3804	231/43701	0.000224042	0.00273197	0.00242969	c108870_g2_i1|m.75435/c123324_g1_i1|m.96984/c73376_g1_i1|m.9813/c98004_g2_i1|m.28460/c105531_g4_i1|m.54790/c100431_g1_i1|m.34834/c109916_g1_i5|m.82933/c109916_g1_i4|m.82931/c109916_g1_i1|m.82919/c107529_g2_i1|m.66180/c111243_g2_i1|m.94168/c111243_g2_i2|m.94170/c107128_g1_i7|m.63566/c81641_g1_i1|m.11915/c89991_g1_i1|m.16952/c95692_g2_i1|m.23817/c104139_g3_i1|m.48038/c104139_g3_i2|m.48039/c105177_g…	37
GO:0007528	neuromuscular junction development	20/3804	97/43701	0.000227523	0.00276802	0.00246175	c104914_g5_i2|m.51528/c110875_g1_i3|m.90985/c90107_g1_i1|m.17049/c101230_g3_i2|m.37056/c110408_g2_i1|m.86753/c101007_g1_i1|m.36407/c108589_g1_i1|m.73594/c110926_g1_i1|m.91432/c105922_g2_i1|m.56787/c110926_g1_i4|m.91437/c107470_g3_i2|m.65850/c105922_g3_i1|m.56788/c110926_g2_i2|m.91440/c110926_g2_i1|m.91434/c62392_g1_i1|m.6368/c110957_g10_i2|m.91664/c111005_g1_i6|m.92127/c110731_g1_i6|m.89644/c7470…	20
GO:0000036	ACP phosphopantetheine attachment site binding involved in fatty acid biosynthetic process	8/3804	21/43701	0.000236001	0.00285145	0.00253595	c102184_g1_i1|m.40178/c102184_g1_i2|m.40179/c73635_g1_i1|m.9850/c94271_g1_i1|m.21352/c90785_g1_i1|m.17705/c90785_g1_i2|m.17712/c94271_g2_i1|m.21353/c94271_g2_i2|m.21354	8
GO:0044620	ACP phosphopantetheine attachment site binding	8/3804	21/43701	0.000236001	0.00285145	0.00253595	c102184_g1_i1|m.40178/c102184_g1_i2|m.40179/c73635_g1_i1|m.9850/c94271_g1_i1|m.21352/c90785_g1_i1|m.17705/c90785_g1_i2|m.17712/c94271_g2_i1|m.21353/c94271_g2_i2|m.21354	8
GO:0051192	prosthetic group binding	8/3804	21/43701	0.000236001	0.00285145	0.00253595	c102184_g1_i1|m.40178/c102184_g1_i2|m.40179/c73635_g1_i1|m.9850/c94271_g1_i1|m.21352/c90785_g1_i1|m.17705/c90785_g1_i2|m.17712/c94271_g2_i1|m.21353/c94271_g2_i2|m.21354	8
GO:0010582	floral meristem determinacy	14/3804	56/43701	0.000242529	0.00292363	0.00260015	c110575_g1_i23|m.88250/c66877_g1_i1|m.7632/c96792_g1_i2|m.25655/c94959_g1_i2|m.22463/c94959_g1_i4|m.22465/c101562_g1_i1|m.38151/c105130_g2_i1|m.52732/c105130_g3_i1|m.52734/c108642_g1_i12|m.73938/c108642_g1_i2|m.73932/c108707_g4_i1|m.74347/c98413_g1_i1|m.29402/c98413_g1_i2|m.29403/c56364_g1_i1|m.5642	14
GO:0043386	mycotoxin biosynthetic process	6/3804	12/43701	0.000252196	0.00303324	0.00269763	c39930_g1_i1|m.4222/c175676_g1_i1|m.102054/c65162_g1_i1|m.7023/c10575_g1_i1|m.902/c98271_g1_i2|m.29054/c97730_g1_i1|m.27870	6
GO:0045785	positive regulation of cell adhesion	27/3804	151/43701	0.000255753	0.00306904	0.00272946	c104914_g5_i2|m.51528/c110875_g1_i3|m.90985/c90107_g1_i1|m.17049/c101230_g3_i2|m.37056/c110408_g2_i1|m.86753/c101007_g1_i1|m.36407/c108589_g1_i1|m.73594/c110926_g1_i1|m.91432/c105922_g2_i1|m.56787/c110926_g1_i4|m.91437/c107470_g3_i2|m.65850/c105922_g3_i1|m.56788/c110926_g2_i2|m.91440/c110926_g2_i1|m.91434/c62392_g1_i1|m.6368/c110957_g10_i2|m.91664/c111005_g1_i6|m.92127/c110731_g1_i6|m.89644/c1111…	27
GO:0072001	renal system development	30/3804	175/43701	0.00025874	0.00309784	0.00275508	c103773_g1_i2|m.46529/c109691_g4_i1|m.81176/c110408_g2_i1|m.86753/c106908_g2_i4|m.62392/c110606_g1_i5|m.88551/c110606_g1_i9|m.88557/c110606_g1_i8|m.88555/c110233_g1_i1|m.85431/c110755_g1_i3|m.89895/c109536_g2_i4|m.80076/c107738_g2_i1|m.67667/c111090_g1_i1|m.92876/c106561_g1_i1|m.60221/c110876_g2_i4|m.91004/c109369_g2_i1|m.78832/c109141_g4_i2|m.77327/c76736_g2_i1|m.10533/c111246_g1_i4|m.94192/c111…	30
GO:1900057	positive regulation of leaf senescence	18/3804	84/43701	0.00027868	0.00332903	0.00296068	c108175_g4_i1|m.70621/c105245_g12_i1|m.53306/c107464_g5_i1|m.65802/c75972_g1_i1|m.10328/c107464_g7_i1|m.65807/c109563_g2_i1|m.80388/c109774_g1_i1|m.81817/c109774_g1_i10|m.81827/c109563_g2_i11|m.80402/c109563_g2_i10|m.80401/c109563_g2_i4|m.80393/c106807_g1_i1|m.61726/c107361_g1_i3|m.65119/c108175_g4_i4|m.70624/c109214_g2_i3|m.77806/c109214_g5_i1|m.77807/c19181_g1_i1|m.2145/c54399_g1_i1|m.5552	18
GO:0036309	protein localization to M-band	11/3804	38/43701	0.000280536	0.00334363	0.00297367	c101230_g2_i3|m.37065/c110875_g1_i3|m.90985/c101230_g3_i2|m.37056/c109550_g1_i7|m.80269/c110926_g1_i6|m.91441/c110926_g1_i4|m.91437/c105922_g3_i1|m.56788/c110731_g1_i6|m.89644/c107738_g1_i1|m.67664/c107738_g1_i4|m.67668/c131658_g1_i1|m.97629	11
GO:2000031	regulation of salicylic acid mediated signaling pathway	26/3804	144/43701	0.000281183	0.0033438	0.00297382	c107470_g3_i6|m.65857/c84898_g1_i1|m.13616/c110731_g2_i1|m.89636/c106023_g1_i1|m.57225/c108175_g4_i1|m.70621/c105245_g12_i1|m.53306/c107464_g5_i1|m.65802/c75972_g1_i1|m.10328/c107464_g7_i1|m.65807/c107464_g2_i1|m.65801/c109563_g2_i1|m.80388/c109774_g1_i8|m.81825/c109774_g1_i1|m.81817/c109774_g1_i10|m.81827/c109563_g2_i11|m.80402/c109563_g2_i10|m.80401/c109563_g2_i4|m.80393/c106807_g1_i1|m.61726/c…	26
GO:0032845	negative regulation of homeostatic process	37/3804	234/43701	0.000290644	0.00344854	0.00306697	c101230_g2_i3|m.37065/c110875_g1_i3|m.90985/c101230_g3_i2|m.37056/c109550_g1_i7|m.80269/c110926_g1_i6|m.91441/c110926_g1_i4|m.91437/c105922_g3_i1|m.56788/c110930_g1_i2|m.91466/c111349_g1_i1|m.94968/c106303_g6_i1|m.58801/c106303_g6_i7|m.58806/c60947_g1_i1|m.6037/c105885_g2_i1|m.56583/c82703_g1_i1|m.12456/c105885_g2_i1|m.56584/c80545_g2_i1|m.11667/c62392_g1_i1|m.6368/c110957_g10_i2|m.91664/c110957_…	37
GO:0015969	guanosine tetraphosphate metabolic process	18/3804	85/43701	0.000325115	0.0038489	0.00342303	c111115_g3_i3|m.93122/c111115_g3_i7|m.93141/c104484_g2_i8|m.49566/c104484_g2_i6|m.49556/c104914_g5_i2|m.51528/c111025_g2_i8|m.92308/c98135_g2_i3|m.28780/c110606_g1_i5|m.88551/c110606_g1_i8|m.88555/c110233_g1_i3|m.85434/c110957_g7_i3|m.91660/c110957_g7_i1|m.91658/c62392_g1_i1|m.6368/c182945_g1_i1|m.102852/c110957_g10_i1|m.91663/c107738_g1_i1|m.67664/c110731_g2_i1|m.89636/c38564_g2_i1|m.4038	18
GO:0007028	cytoplasm organization	16/3804	71/43701	0.000327313	0.00386625	0.00343846	c109536_g2_i4|m.80076/c111090_g1_i1|m.92876/c106561_g1_i1|m.60221/c110876_g2_i4|m.91004/c109369_g2_i1|m.78832/c109141_g4_i2|m.77327/c76736_g2_i1|m.10533/c111246_g1_i4|m.94192/c111251_g1_i1|m.94217/c109336_g2_i2|m.78590/c110699_g3_i1|m.89418/c110876_g2_i2|m.91002/c102673_g2_i4|m.41973/c110428_g2_i1|m.86954/c105930_g2_i1|m.56817/c140384_g1_i1|m.98628	16
GO:0033267	axon part	32/3804	194/43701	0.000337268	0.00397495	0.00353514	c101230_g2_i3|m.37065/c104914_g5_i2|m.51528/c110875_g1_i3|m.90985/c90107_g1_i1|m.17049/c109691_g1_i2|m.81174/c101230_g3_i2|m.37056/c110408_g2_i1|m.86753/c101007_g1_i1|m.36407/c108589_g1_i1|m.73594/c110926_g1_i1|m.91432/c105922_g2_i1|m.56787/c110926_g1_i4|m.91437/c107470_g3_i2|m.65850/c105922_g3_i1|m.56788/c110926_g2_i2|m.91440/c110926_g2_i1|m.91434/c62392_g1_i1|m.6368/c110957_g10_i2|m.91664/c1110…	32
GO:0009277	fungal-type cell wall	12/3804	45/43701	0.000349326	0.00409876	0.00364525	c102740_g1_i1|m.42213/c120530_g1_i1|m.96505/c113132_g1_i1|m.95892/c96944_g1_i1|m.25902/c4159_g1_i1|m.350/c18911_g1_i1|m.2088/c62404_g1_i2|m.6372/c62404_g1_i1|m.6370/c182293_g1_i1|m.102816/c90303_g2_i2|m.17251/c135211_g1_i1|m.98001/c70054_g1_i1|m.8450	12
GO:1903779	regulation of cardiac conduction	12/3804	45/43701	0.000349326	0.00409876	0.00364525	c101230_g2_i3|m.37065/c110875_g1_i3|m.90985/c101230_g3_i2|m.37056/c109550_g1_i7|m.80269/c110926_g1_i6|m.91441/c110926_g1_i4|m.91437/c105922_g3_i1|m.56788/c110731_g1_i6|m.89644/c107738_g1_i1|m.67664/c107738_g1_i4|m.67668/c140384_g1_i1|m.98628/c41934_g1_i1|m.4629	12
GO:1901021	positive regulation of calcium ion transmembrane transporter activity	11/3804	39/43701	0.000360223	0.00421725	0.00375063	c101230_g2_i3|m.37065/c110875_g1_i3|m.90985/c101230_g3_i2|m.37056/c109550_g1_i7|m.80269/c110926_g1_i6|m.91441/c110926_g1_i4|m.91437/c105922_g3_i1|m.56788/c110731_g1_i6|m.89644/c107738_g1_i1|m.67664/c107738_g1_i4|m.67668/c61719_g2_i1|m.6146	11
GO:0010374	stomatal complex development	44/3804	297/43701	0.00036555	0.00426713	0.00379499	c100573_g2_i1|m.35194/c123324_g1_i1|m.96984/c73376_g1_i1|m.9813/c98004_g2_i1|m.28460/c109696_g6_i2|m.81216/c105531_g4_i1|m.54790/c109076_g1_i1|m.76864/c98004_g6_i1|m.28466/c111174_g2_i1|m.93612/c100431_g1_i1|m.34834/c109916_g1_i5|m.82933/c109916_g1_i4|m.82931/c109916_g1_i1|m.82919/c107529_g2_i1|m.66180/c111243_g2_i1|m.94168/c111243_g2_i2|m.94170/c109688_g3_i6|m.81160/c81641_g1_i1|m.11915/c89991_g…	44
GO:0022407	regulation of cell-cell adhesion	23/3804	123/43701	0.0003661	0.00426713	0.00379499	c104914_g5_i2|m.51528/c110875_g1_i3|m.90985/c90107_g1_i1|m.17049/c101230_g3_i2|m.37056/c110408_g2_i1|m.86753/c101007_g1_i1|m.36407/c108589_g1_i1|m.73594/c110926_g1_i1|m.91432/c105922_g2_i1|m.56787/c110926_g1_i4|m.91437/c107470_g3_i2|m.65850/c105922_g3_i1|m.56788/c110926_g2_i2|m.91440/c110926_g2_i1|m.91434/c62392_g1_i1|m.6368/c110957_g10_i2|m.91664/c111005_g1_i6|m.92127/c110731_g1_i6|m.89644/c7470…	23
GO:0042178	xenobiotic catabolic process	15/3804	65/43701	0.000378934	0.00440698	0.00391937	c105756_g1_i1|m.55878/c105756_g1_i2|m.55880/c105756_g1_i3|m.55881/c24214_g1_i1|m.2588/c105756_g1_i4|m.55882/c105756_g2_i1|m.55884/c106171_g2_i1|m.57973/c106171_g4_i1|m.57974/c67767_g3_i1|m.7852/c61719_g2_i1|m.6146/c95139_g2_i1|m.22766/c106171_g4_i3|m.57977/c106171_g4_i2|m.57976/c106171_g4_i4|m.57978/c106171_g6_i1|m.57979	15
GO:0009646	response to absence of light	33/3804	205/43701	0.000432336	0.005017	0.00446189	c100634_g2_i2|m.35351/c96406_g1_i1|m.24989/c170194_g1_i1|m.101495/c62898_g1_i1|m.6498/c106509_g3_i1|m.59952/c105978_g5_i1|m.57084/c109349_g2_i4|m.78707/c98004_g5_i1|m.28465/c13355_g1_i1|m.1308/c109916_g2_i6|m.82935/c109916_g2_i2|m.82923/c109916_g2_i3|m.82928/c107529_g3_i1|m.66181/c101109_g1_i1|m.36687/c85263_g1_i1|m.13782/c85263_g2_i1|m.13783/c81641_g1_i1|m.11915/c100939_g1_i2|m.36240/c109768_g9_…	33
GO:0047381	dodecanoyl-[acyl-carrier-protein] hydrolase activity	6/3804	13/43701	0.000433829	0.00502328	0.00446748	c102184_g1_i1|m.40178/c102184_g1_i2|m.40179/c73635_g1_i1|m.9850/c94271_g1_i1|m.21352/c94271_g2_i1|m.21353/c94271_g2_i2|m.21354	6
GO:0010337	regulation of salicylic acid metabolic process	22/3804	117/43701	0.000448465	0.00518139	0.00460809	c108175_g4_i1|m.70621/c105245_g12_i1|m.53306/c107464_g5_i1|m.65802/c75972_g1_i1|m.10328/c107464_g7_i1|m.65807/c107464_g2_i1|m.65801/c109563_g2_i1|m.80388/c109774_g1_i8|m.81825/c109774_g1_i1|m.81817/c109774_g1_i10|m.81827/c109563_g2_i11|m.80402/c109563_g2_i10|m.80401/c109563_g2_i4|m.80393/c106807_g1_i1|m.61726/c107361_g1_i3|m.65119/c108175_g4_i4|m.70624/c109214_g2_i3|m.77806/c109214_g5_i1|m.77807/…	22
GO:0034767	positive regulation of ion transmembrane transport	26/3804	149/43701	0.000486229	0.00560543	0.00498522	c101230_g2_i3|m.37065/c104914_g5_i2|m.51528/c110875_g1_i3|m.90985/c90107_g1_i1|m.17049/c101230_g3_i2|m.37056/c110408_g2_i1|m.86753/c109550_g1_i7|m.80269/c101007_g1_i1|m.36407/c108589_g1_i1|m.73594/c110926_g1_i1|m.91432/c105922_g2_i1|m.56787/c110926_g1_i6|m.91441/c110926_g1_i4|m.91437/c107470_g3_i2|m.65850/c105922_g3_i1|m.56788/c110926_g2_i2|m.91440/c110926_g2_i1|m.91434/c62392_g1_i1|m.6368/c11095…	26
GO:0010048	vernalization response	18/3804	88/43701	0.000506925	0.0058313	0.00518609	c2391_g1_i1|m.123/c93674_g1_i2|m.20476/c99993_g1_i4|m.33542/c99993_g1_i3|m.33541/c105064_g1_i3|m.52303/c105064_g1_i10|m.52316/c105064_g1_i12|m.52320/c105064_g1_i4|m.52305/c115204_g1_i1|m.96072/c109990_g1_i1|m.83495/c109990_g1_i2|m.83496/c100693_g1_i5|m.35528/c101176_g1_i1|m.36895/c101176_g1_i2|m.36896/c84247_g2_i2|m.13273/c94959_g1_i4|m.22465/c103544_g1_i11|m.45688/c103544_g1_i8|m.45680	18
GO:0061326	renal tubule development	15/3804	67/43701	0.000535285	0.00613256	0.00545402	c109536_g2_i4|m.80076/c111090_g1_i1|m.92876/c106561_g1_i1|m.60221/c110876_g2_i4|m.91004/c109369_g2_i1|m.78832/c109141_g4_i2|m.77327/c76736_g2_i1|m.10533/c111246_g1_i4|m.94192/c111251_g1_i1|m.94217/c109336_g2_i2|m.78590/c110699_g3_i1|m.89418/c110876_g2_i2|m.91002/c102673_g2_i4|m.41973/c110428_g2_i1|m.86954/c105930_g2_i1|m.56817	15
GO:0043266	regulation of potassium ion transport	27/3804	158/43701	0.000537825	0.00613256	0.00545402	c101230_g2_i3|m.37065/c104914_g5_i2|m.51528/c110875_g1_i3|m.90985/c90107_g1_i1|m.17049/c101230_g3_i2|m.37056/c110408_g2_i1|m.86753/c109550_g1_i7|m.80269/c101007_g1_i1|m.36407/c108589_g1_i1|m.73594/c110926_g1_i1|m.91432/c105922_g2_i1|m.56787/c110926_g1_i6|m.91441/c110926_g1_i4|m.91437/c107470_g3_i2|m.65850/c105922_g3_i1|m.56788/c110926_g2_i2|m.91440/c110926_g2_i1|m.91434/c62392_g1_i1|m.6368/c11095…	27
GO:0061337	cardiac conduction	12/3804	47/43701	0.000538922	0.00613256	0.00545402	c101230_g2_i3|m.37065/c110875_g1_i3|m.90985/c101230_g3_i2|m.37056/c109550_g1_i7|m.80269/c110926_g1_i6|m.91441/c110926_g1_i4|m.91437/c105922_g3_i1|m.56788/c110731_g1_i6|m.89644/c107738_g1_i1|m.67664/c107738_g1_i4|m.67668/c140384_g1_i1|m.98628/c41934_g1_i1|m.4629	12
GO:0070783	growth of unicellular organism as a thread of attached cells	12/3804	47/43701	0.000538922	0.00613256	0.00545402	c82167_g1_i1|m.12143/c93910_g1_i1|m.20801/c85947_g1_i1|m.14251/c103418_g4_i4|m.45024/c163418_g1_i1|m.100927/c99196_g1_i1|m.31537/c73312_g2_i1|m.9783/c4159_g1_i1|m.350/c11731_g1_i1|m.1043/c20707_g1_i1|m.2306/c76798_g1_i1|m.10570/c82736_g1_i1|m.12475	12
GO:0086065	cell communication involved in cardiac conduction	12/3804	47/43701	0.000538922	0.00613256	0.00545402	c101230_g2_i3|m.37065/c110875_g1_i3|m.90985/c101230_g3_i2|m.37056/c109550_g1_i7|m.80269/c110926_g1_i6|m.91441/c110926_g1_i4|m.91437/c105922_g3_i1|m.56788/c110731_g1_i6|m.89644/c107738_g1_i1|m.67664/c107738_g1_i4|m.67668/c140384_g1_i1|m.98628/c41934_g1_i1|m.4629	12
GO:0038179	neurotrophin signaling pathway	10/3804	35/43701	0.000591982	0.00672186	0.00597812	c103773_g8_i2|m.46545/c109550_g1_i9|m.80276/c111025_g2_i8|m.92308/c101230_g3_i2|m.37056/c110408_g2_i1|m.86753/c109550_g1_i7|m.80269/c106908_g2_i1|m.62388/c98135_g2_i3|m.28780/c110606_g1_i5|m.88551/c35192_g2_i1|m.3753	10
GO:0007314	oocyte anterior/posterior axis specification	16/3804	75/43701	0.000626615	0.00708464	0.00630075	c109536_g2_i4|m.80076/c111090_g1_i1|m.92876/c106561_g1_i1|m.60221/c110876_g2_i4|m.91004/c109369_g2_i1|m.78832/c109141_g4_i2|m.77327/c76736_g2_i1|m.10533/c111246_g1_i4|m.94192/c111251_g1_i1|m.94217/c109336_g2_i2|m.78590/c110699_g3_i1|m.89418/c110876_g2_i2|m.91002/c102673_g2_i4|m.41973/c110428_g2_i1|m.86954/c105930_g2_i1|m.56817/c140384_g1_i1|m.98628	16
GO:0008358	maternal determination of anterior/posterior axis, embryo	16/3804	75/43701	0.000626615	0.00708464	0.00630075	c109536_g2_i4|m.80076/c111090_g1_i1|m.92876/c106561_g1_i1|m.60221/c110876_g2_i4|m.91004/c109369_g2_i1|m.78832/c109141_g4_i2|m.77327/c76736_g2_i1|m.10533/c111246_g1_i4|m.94192/c111251_g1_i1|m.94217/c109336_g2_i2|m.78590/c110699_g3_i1|m.89418/c110876_g2_i2|m.91002/c102673_g2_i4|m.41973/c110428_g2_i1|m.86954/c105930_g2_i1|m.56817/c140384_g1_i1|m.98628	16
GO:0015798	myo-inositol transport	8/3804	24/43701	0.000672873	0.00759139	0.00675143	c101332_g5_i1|m.37410/c104098_g2_i5|m.47870/c108697_g1_i1|m.74263/c109841_g6_i1|m.82328/c17960_g1_i1|m.1884/c105557_g1_i1|m.54891/c76798_g1_i1|m.10570/c82736_g1_i1|m.12475	8
GO:0050680	negative regulation of epithelial cell proliferation	21/3804	113/43701	0.000701405	0.00787273	0.00700165	c109536_g2_i4|m.80076/c111090_g1_i1|m.92876/c106561_g1_i1|m.60221/c110876_g2_i4|m.91004/c109369_g2_i1|m.78832/c109141_g4_i2|m.77327/c76736_g2_i1|m.10533/c111246_g1_i4|m.94192/c111251_g1_i1|m.94217/c109336_g2_i2|m.78590/c110699_g3_i1|m.89418/c110876_g2_i2|m.91002/c102673_g2_i4|m.41973/c110428_g2_i1|m.86954/c102636_g1_i1|m.41801/c102636_g1_i3|m.41810/c105930_g2_i1|m.56817/c107357_g4_i1|m.65075/c107…	21
GO:0030241	skeletal muscle myosin thick filament assembly	6/3804	14/43701	0.000703324	0.00787273	0.00700165	c8278_g1_i2|m.642/c36762_g1_i1|m.3884/c184345_g1_i1|m.102895/c131658_g1_i1|m.97629/c174246_g1_i1|m.101760/c41491_g2_i1|m.4550	6
GO:0060972	left/right pattern formation	6/3804	14/43701	0.000703324	0.00787273	0.00700165	c110408_g2_i1|m.86753/c110606_g1_i5|m.88551/c110606_g1_i9|m.88557/c110606_g1_i8|m.88555/c110233_g1_i1|m.85431/c107738_g2_i1|m.67667	6
GO:0007472	wing disc morphogenesis	17/3804	83/43701	0.000705266	0.00787273	0.00700165	c109536_g2_i4|m.80076/c111090_g1_i1|m.92876/c106561_g1_i1|m.60221/c110876_g2_i4|m.91004/c109369_g2_i1|m.78832/c109141_g4_i2|m.77327/c76736_g2_i1|m.10533/c111246_g1_i4|m.94192/c111251_g1_i1|m.94217/c109336_g2_i2|m.78590/c110699_g3_i1|m.89418/c110876_g2_i2|m.91002/c24515_g1_i1|m.2633/c102673_g2_i4|m.41973/c110428_g2_i1|m.86954/c105930_g2_i1|m.56817/c140384_g1_i1|m.98628	17
GO:0007476	imaginal disc-derived wing morphogenesis	17/3804	83/43701	0.000705266	0.00787273	0.00700165	c109536_g2_i4|m.80076/c111090_g1_i1|m.92876/c106561_g1_i1|m.60221/c110876_g2_i4|m.91004/c109369_g2_i1|m.78832/c109141_g4_i2|m.77327/c76736_g2_i1|m.10533/c111246_g1_i4|m.94192/c111251_g1_i1|m.94217/c109336_g2_i2|m.78590/c110699_g3_i1|m.89418/c110876_g2_i2|m.91002/c24515_g1_i1|m.2633/c102673_g2_i4|m.41973/c110428_g2_i1|m.86954/c105930_g2_i1|m.56817/c140384_g1_i1|m.98628	17
GO:0009861	jasmonic acid and ethylene-dependent systemic resistance	25/3804	145/43701	0.000740221	0.0082455	0.00733317	c105531_g4_i1|m.54790/c107529_g1_i1|m.66178/c105522_g2_i1|m.54733/c105522_g2_i3|m.54738/c105522_g2_i4|m.54740/c105522_g2_i7|m.54746/c104139_g3_i2|m.48039/c110303_g1_i11|m.86022/c110303_g1_i17|m.86040/c110303_g1_i4|m.86001/c105522_g9_i1|m.54749/c110303_g1_i3|m.85999/c106430_g5_i2|m.59404/c106430_g1_i1|m.59395/c106430_g1_i5|m.59399/c106430_g1_i6|m.59400/c100573_g1_i1|m.35193/c106430_g6_i10|m.59420/…	25
GO:0008037	cell recognition	49/3804	352/43701	0.000749833	0.00832969	0.00740804	c105315_g1_i3|m.53711/c66266_g1_i1|m.7288/c91794_g1_i1|m.18669/c111189_g2_i1|m.93788/c105964_g1_i1|m.57006/c107381_g1_i1|m.65261/c96357_g1_i1|m.24886/c86837_g2_i1|m.14956/c106894_g3_i1|m.62282/c110873_g1_i1|m.90965/c93280_g1_i1|m.20091/c97651_g1_i1|m.27689/c109343_g2_i2|m.78632/c109343_g2_i1|m.78625/c109343_g2_i3|m.78633/c109343_g3_i1|m.78628/c110943_g4_i1|m.91584/c62772_g1_i1|m.6470/c92858_g2_i1…	49
GO:0034605	cellular response to heat	48/3804	343/43701	0.000750934	0.00832969	0.00740804	c98390_g1_i3|m.29359/c108870_g2_i1|m.75435/c123324_g1_i1|m.96984/c73376_g1_i1|m.9813/c98004_g2_i1|m.28460/c100079_g1_i1|m.33781/c65338_g1_i1|m.7067/c165935_g1_i1|m.101210/c8936_g1_i1|m.742/c152482_g1_i1|m.99831/c91762_g2_i1|m.18639/c69320_g1_i1|m.8175/c105531_g4_i1|m.54790/c35192_g2_i1|m.3753/c100431_g1_i1|m.34834/c109916_g1_i5|m.82933/c109916_g1_i4|m.82931/c109916_g1_i1|m.82919/c107529_g2_i1|m.6…	48
GO:0055001	muscle cell development	28/3804	170/43701	0.000782987	0.00866702	0.00770805	c101230_g2_i3|m.37065/c110875_g1_i3|m.90985/c101230_g3_i2|m.37056/c109550_g1_i7|m.80269/c109550_g2_i1|m.80257/c110926_g1_i6|m.91441/c110926_g1_i4|m.91437/c105922_g3_i1|m.56788/c154994_g1_i1|m.100054/c110731_g1_i6|m.89644/c107738_g1_i1|m.67664/c107738_g1_i4|m.67668/c8278_g1_i2|m.642/c36762_g1_i1|m.3884/c184345_g1_i1|m.102895/c110534_g1_i2|m.87929/c60241_g1_i1|m.5980/c24515_g1_i1|m.2633/c46265_g1_i…	28
GO:0006805	xenobiotic metabolic process	22/3804	122/43701	0.000809483	0.0089229	0.00793562	c105756_g1_i1|m.55878/c105756_g1_i2|m.55880/c105756_g1_i3|m.55881/c24214_g1_i1|m.2588/c105756_g1_i4|m.55882/c105756_g2_i1|m.55884/c106171_g2_i1|m.57973/c106171_g4_i1|m.57974/c135692_g1_i1|m.98095/c70219_g1_i1|m.8579/c145734_g1_i1|m.98958/c67767_g3_i1|m.7852/c61719_g2_i1|m.6146/c95139_g2_i1|m.22766/c106171_g4_i3|m.57977/c106171_g4_i2|m.57976/c106171_g4_i4|m.57978/c106171_g6_i1|m.57979/c108212_g1_i…	22
GO:0071466	cellular response to xenobiotic stimulus	22/3804	122/43701	0.000809483	0.0089229	0.00793562	c105756_g1_i1|m.55878/c105756_g1_i2|m.55880/c105756_g1_i3|m.55881/c24214_g1_i1|m.2588/c105756_g1_i4|m.55882/c105756_g2_i1|m.55884/c106171_g2_i1|m.57973/c106171_g4_i1|m.57974/c135692_g1_i1|m.98095/c70219_g1_i1|m.8579/c145734_g1_i1|m.98958/c67767_g3_i1|m.7852/c61719_g2_i1|m.6146/c95139_g2_i1|m.22766/c106171_g4_i3|m.57977/c106171_g4_i2|m.57976/c106171_g4_i4|m.57978/c106171_g6_i1|m.57979/c108212_g1_i…	22
GO:0042562	hormone binding	25/3804	146/43701	0.000820521	0.00902573	0.00802707	c110767_g1_i2|m.89970/c85263_g1_i1|m.13782/c100651_g1_i2|m.35407/c100939_g1_i1|m.36239/c100939_g1_i2|m.36240/c109950_g2_i5|m.83198/c109950_g2_i1|m.83191/c109950_g2_i2|m.83192/c105380_g1_i1|m.54055/c110744_g4_i1|m.89747/c110053_g4_i1|m.84022/c110053_g5_i1|m.84024/c91215_g2_i1|m.18153/c95597_g2_i1|m.23587/c104025_g1_i1|m.47565/c99159_g1_i1|m.31458/c106803_g2_i2|m.61696/c106803_g2_i5|m.61697/c85577_…	25
GO:1990778	protein localization to cell periphery	42/3804	291/43701	0.000836919	0.00918697	0.00817047	c101230_g2_i3|m.37065/c111115_g3_i3|m.93122/c111115_g3_i7|m.93141/c104484_g2_i8|m.49566/c104484_g2_i6|m.49556/c104914_g5_i2|m.51528/c110875_g1_i3|m.90985/c124789_g1_i1|m.97139/c90107_g1_i1|m.17049/c101230_g3_i2|m.37056/c110408_g2_i1|m.86753/c109550_g1_i7|m.80269/c109691_g1_i1|m.81172/c101007_g1_i1|m.36407/c108589_g1_i1|m.73594/c110926_g1_i1|m.91432/c105922_g2_i1|m.56787/c110926_g1_i6|m.91441/c110…	42
GO:0030239	myofibril assembly	16/3804	77/43701	0.000848511	0.00929489	0.00826645	c109550_g2_i1|m.80257/c154994_g1_i1|m.100054/c8278_g1_i2|m.642/c36762_g1_i1|m.3884/c184345_g1_i1|m.102895/c60241_g1_i1|m.5980/c24515_g1_i1|m.2633/c46265_g1_i1|m.5024/c33420_g1_i1|m.3683/c127872_g1_i1|m.97428/c127519_g1_i1|m.97395/c152080_g1_i1|m.99794/c131658_g1_i1|m.97629/c153413_g1_i1|m.99932/c174246_g1_i1|m.101760/c41491_g2_i1|m.4550	16
GO:0042545	cell wall modification	62/3804	474/43701	0.000861981	0.0094229	0.0083803	c100573_g2_i1|m.35194/c139116_g1_i1|m.98515/c29342_g2_i1|m.3268/c100573_g3_i1|m.35195/c109924_g1_i3|m.82988/c101515_g1_i1|m.37973/c109845_g3_i1|m.82373/c110732_g1_i2|m.89648/c109845_g2_i1|m.82369/c111086_g3_i1|m.92774/c108987_g2_i3|m.76192/c98004_g6_i1|m.28466/c13355_g1_i1|m.1308/c111243_g2_i1|m.94167/c100431_g1_i1|m.34834/c95692_g3_i1|m.23818/c106352_g4_i1|m.59099/c104117_g1_i1|m.47932/c111090_g…	62
GO:0009955	adaxial/abaxial pattern specification	36/3804	239/43701	0.000873294	0.00952684	0.00847273	c123324_g1_i1|m.96984/c73376_g1_i1|m.9813/c98004_g2_i1|m.28460/c105531_g4_i1|m.54790/c100431_g1_i1|m.34834/c109916_g1_i5|m.82933/c109916_g1_i4|m.82931/c109916_g1_i1|m.82919/c107529_g2_i1|m.66180/c111243_g2_i1|m.94168/c111243_g2_i2|m.94170/c81641_g1_i1|m.11915/c89991_g1_i1|m.16952/c95692_g2_i1|m.23817/c103418_g4_i4|m.45024/c104139_g3_i1|m.48038/c104139_g3_i2|m.48039/c105177_g1_i5|m.52954/c111379_g…	36
GO:0036371	protein localization to T-tubule	10/3804	37/43701	0.000956278	0.0103044	0.00916425	c101230_g2_i3|m.37065/c110875_g1_i3|m.90985/c101230_g3_i2|m.37056/c109550_g1_i7|m.80269/c110926_g1_i6|m.91441/c110926_g1_i4|m.91437/c105922_g3_i1|m.56788/c110731_g1_i6|m.89644/c107738_g1_i1|m.67664/c107738_g1_i4|m.67668	10
GO:0086015	SA node cell action potential	10/3804	37/43701	0.000956278	0.0103044	0.00916425	c101230_g2_i3|m.37065/c110875_g1_i3|m.90985/c101230_g3_i2|m.37056/c109550_g1_i7|m.80269/c110926_g1_i6|m.91441/c110926_g1_i4|m.91437/c105922_g3_i1|m.56788/c110731_g1_i6|m.89644/c107738_g1_i1|m.67664/c107738_g1_i4|m.67668	10
GO:0086018	SA node cell to atrial cardiac muscle cell signalling	10/3804	37/43701	0.000956278	0.0103044	0.00916425	c101230_g2_i3|m.37065/c110875_g1_i3|m.90985/c101230_g3_i2|m.37056/c109550_g1_i7|m.80269/c110926_g1_i6|m.91441/c110926_g1_i4|m.91437/c105922_g3_i1|m.56788/c110731_g1_i6|m.89644/c107738_g1_i1|m.67664/c107738_g1_i4|m.67668	10
GO:0086070	SA node cell to atrial cardiac muscle cell communication	10/3804	37/43701	0.000956278	0.0103044	0.00916425	c101230_g2_i3|m.37065/c110875_g1_i3|m.90985/c101230_g3_i2|m.37056/c109550_g1_i7|m.80269/c110926_g1_i6|m.91441/c110926_g1_i4|m.91437/c105922_g3_i1|m.56788/c110731_g1_i6|m.89644/c107738_g1_i1|m.67664/c107738_g1_i4|m.67668	10
GO:0086091	regulation of heart rate by cardiac conduction	10/3804	37/43701	0.000956278	0.0103044	0.00916425	c101230_g2_i3|m.37065/c110875_g1_i3|m.90985/c101230_g3_i2|m.37056/c109550_g1_i7|m.80269/c110926_g1_i6|m.91441/c110926_g1_i4|m.91437/c105922_g3_i1|m.56788/c110731_g1_i6|m.89644/c107738_g1_i1|m.67664/c107738_g1_i4|m.67668	10
GO:0098907	regulation of SA node cell action potential	10/3804	37/43701	0.000956278	0.0103044	0.00916425	c101230_g2_i3|m.37065/c110875_g1_i3|m.90985/c101230_g3_i2|m.37056/c109550_g1_i7|m.80269/c110926_g1_i6|m.91441/c110926_g1_i4|m.91437/c105922_g3_i1|m.56788/c110731_g1_i6|m.89644/c107738_g1_i1|m.67664/c107738_g1_i4|m.67668	10
GO:0071324	cellular response to disaccharide stimulus	20/3804	108/43701	0.000971897	0.0104514	0.00929496	c108175_g4_i1|m.70621/c105245_g12_i1|m.53306/c107464_g5_i1|m.65802/c75972_g1_i1|m.10328/c107464_g7_i1|m.65807/c107464_g2_i1|m.65801/c109563_g2_i1|m.80388/c109774_g1_i8|m.81825/c109774_g1_i1|m.81817/c109774_g1_i10|m.81827/c109563_g2_i11|m.80402/c109563_g2_i10|m.80401/c109563_g2_i4|m.80393/c106807_g1_i1|m.61726/c107361_g1_i3|m.65119/c108175_g4_i4|m.70624/c109214_g2_i3|m.77806/c109214_g5_i1|m.77807/…	20
GO:0006612	protein targeting to membrane	41/3804	285/43701	0.0010205	0.0109477	0.00973642	c101230_g2_i3|m.37065/c111115_g3_i3|m.93122/c111115_g3_i7|m.93141/c104484_g2_i8|m.49566/c104484_g2_i6|m.49556/c104914_g5_i2|m.51528/c110875_g1_i3|m.90985/c124789_g1_i1|m.97139/c90107_g1_i1|m.17049/c101230_g3_i2|m.37056/c110408_g2_i1|m.86753/c109550_g1_i7|m.80269/c109691_g1_i1|m.81172/c101007_g1_i1|m.36407/c108589_g1_i1|m.73594/c110926_g1_i1|m.91432/c105922_g2_i1|m.56787/c110926_g1_i6|m.91441/c110…	41
GO:0048444	floral organ morphogenesis	49/3804	357/43701	0.0010222	0.0109477	0.00973642	c110575_g1_i23|m.88250/c98004_g5_i1|m.28465/c13355_g1_i1|m.1308/c109916_g2_i6|m.82935/c109916_g2_i2|m.82923/c109916_g2_i3|m.82928/c107529_g3_i1|m.66181/c101109_g1_i1|m.36687/c124232_g1_i1|m.97076/c110767_g1_i2|m.89970/c85263_g1_i1|m.13782/c85263_g2_i1|m.13783/c81641_g1_i1|m.11915/c163295_g1_i1|m.100910/c14235_g1_i1|m.1407/c111270_g3_i8|m.94353/c100939_g1_i2|m.36240/c104117_g4_i1|m.47939/c107187_g…	49
GO:0010083	regulation of vegetative meristem growth	6/3804	15/43701	0.00108609	0.011585	0.0103032	c106523_g1_i1|m.60018/c106523_g2_i1|m.60020/c106523_g4_i1|m.60022/c106523_g7_i1|m.60024/c106552_g1_i5|m.60177/c122388_g1_i1|m.96868	6
GO:0050404	zeatin O-beta-D-xylosyltransferase activity	6/3804	15/43701	0.00108609	0.011585	0.0103032	c106523_g1_i1|m.60018/c106523_g2_i1|m.60020/c106523_g4_i1|m.60022/c106523_g7_i1|m.60024/c106552_g1_i5|m.60177/c122388_g1_i1|m.96868	6
GO:0043270	positive regulation of ion transport	31/3804	199/43701	0.0011032	0.0117438	0.0104444	c101230_g2_i3|m.37065/c104914_g5_i2|m.51528/c110875_g1_i3|m.90985/c90107_g1_i1|m.17049/c101230_g3_i2|m.37056/c110408_g2_i1|m.86753/c109550_g1_i7|m.80269/c101007_g1_i1|m.36407/c108589_g1_i1|m.73594/c110926_g1_i1|m.91432/c105922_g2_i1|m.56787/c110926_g1_i6|m.91441/c110926_g1_i4|m.91437/c107470_g3_i2|m.65850/c105922_g3_i1|m.56788/c110926_g2_i2|m.91440/c110926_g2_i1|m.91434/c62392_g1_i1|m.6368/c11095…	31
GO:0031426	polycistronic mRNA processing	15/3804	72/43701	0.00118264	0.012564	0.0111739	c106654_g9_i1|m.60803/c98822_g1_i1|m.30502/c96688_g5_i1|m.25462/c109255_g14_i1|m.78120/c111276_g6_i1|m.94434/c94785_g2_i1|m.22209/c120317_g1_i1|m.96448/c107850_g6_i2|m.68356/c107850_g6_i3|m.68358/c109415_g1_i5|m.79187/c109415_g1_i6|m.79189/c110753_g3_i1|m.89880/c48283_g1_i1|m.5142/c48283_g1_i2|m.5143/c63850_g2_i2|m.6739	15
GO:0033292	T-tubule organization	10/3804	38/43701	0.00119762	0.0126722	0.01127	c101230_g2_i3|m.37065/c110875_g1_i3|m.90985/c101230_g3_i2|m.37056/c109550_g1_i7|m.80269/c110926_g1_i6|m.91441/c110926_g1_i4|m.91437/c105922_g3_i1|m.56788/c110731_g1_i6|m.89644/c107738_g1_i1|m.67664/c107738_g1_i4|m.67668	10
GO:0098910	regulation of atrial cardiac muscle cell action potential	10/3804	38/43701	0.00119762	0.0126722	0.01127	c101230_g2_i3|m.37065/c110875_g1_i3|m.90985/c101230_g3_i2|m.37056/c109550_g1_i7|m.80269/c110926_g1_i6|m.91441/c110926_g1_i4|m.91437/c105922_g3_i1|m.56788/c110731_g1_i6|m.89644/c107738_g1_i1|m.67664/c107738_g1_i4|m.67668	10
GO:0030638	polyketide metabolic process	8/3804	26/43701	0.00122091	0.0128928	0.0114663	c135692_g1_i1|m.98095/c70219_g1_i1|m.8579/c145734_g1_i1|m.98958/c104870_g1_i2|m.51309/c28952_g2_i1|m.3113/c80541_g1_i1|m.11666/c181448_g1_i1|m.102732/c48192_g1_i1|m.5139	8
GO:0009986	cell surface	47/3804	342/43701	0.00124314	0.0131013	0.0116517	c104914_g5_i2|m.51528/c110875_g1_i3|m.90985/c90107_g1_i1|m.17049/c101230_g3_i2|m.37056/c110408_g2_i1|m.86753/c101007_g1_i1|m.36407/c108589_g1_i1|m.73594/c110926_g1_i1|m.91432/c105922_g2_i1|m.56787/c110926_g1_i4|m.91437/c107470_g3_i2|m.65850/c105922_g3_i1|m.56788/c110926_g2_i2|m.91440/c110926_g2_i1|m.91434/c62392_g1_i1|m.6368/c110957_g10_i2|m.91664/c111005_g1_i6|m.92127/c110731_g1_i6|m.89644/c1630…	47
GO:0035315	hair cell differentiation	18/3804	95/43701	0.00129769	0.013649	0.0121388	c109691_g4_i1|m.81176/c109536_g2_i4|m.80076/c111090_g1_i1|m.92876/c106561_g1_i1|m.60221/c110876_g2_i4|m.91004/c109369_g2_i1|m.78832/c109141_g4_i2|m.77327/c76736_g2_i1|m.10533/c111246_g1_i4|m.94192/c111251_g1_i1|m.94217/c109336_g2_i2|m.78590/c110699_g3_i1|m.89418/c59668_g1_i1|m.5864/c110876_g2_i2|m.91002/c24515_g1_i1|m.2633/c102673_g2_i4|m.41973/c110428_g2_i1|m.86954/c105930_g2_i1|m.56817	18
GO:0001736	establishment of planar polarity	26/3804	159/43701	0.0013138	0.013791	0.0122651	c103773_g1_i2|m.46529/c109550_g2_i1|m.80257/c106908_g2_i4|m.62392/c110755_g1_i3|m.89895/c3651_g2_i1|m.296/c154994_g1_i1|m.100054/c109536_g2_i4|m.80076/c111090_g1_i1|m.92876/c106561_g1_i1|m.60221/c110876_g2_i4|m.91004/c109369_g2_i1|m.78832/c109141_g4_i2|m.77327/c76736_g2_i1|m.10533/c111246_g1_i4|m.94192/c111251_g1_i1|m.94217/c109336_g2_i2|m.78590/c110699_g3_i1|m.89418/c110876_g2_i2|m.91002/c24515_…	26
GO:0042743	hydrogen peroxide metabolic process	47/3804	343/43701	0.00132129	0.0138421	0.0123105	c100701_g1_i1|m.35547/c103825_g1_i1|m.46711/c77916_g1_i1|m.10959/c78819_g3_i1|m.11237/c102046_g1_i1|m.39705/c103790_g1_i1|m.46606/c121465_g1_i1|m.96717/c93405_g1_i1|m.20222/c93324_g1_i1|m.20136/c126029_g1_i1|m.97278/c51288_g1_i1|m.5398/c106807_g2_i1|m.61728/c108175_g4_i3|m.70623/c108175_g4_i1|m.70621/c108175_g4_i5|m.70625/c74723_g2_i2|m.10005/c109214_g4_i2|m.77804/c105245_g12_i1|m.53306/c107464_g…	47
GO:0007004	telomere maintenance via telomerase	28/3804	176/43701	0.00135095	0.0141248	0.0125619	c109691_g1_i1|m.81172/c110930_g1_i2|m.91466/c111349_g1_i1|m.94968/c106303_g6_i1|m.58801/c106303_g6_i7|m.58806/c60947_g1_i1|m.6037/c105885_g2_i1|m.56583/c82703_g1_i1|m.12456/c105885_g2_i1|m.56584/c80545_g2_i1|m.11667/c62392_g1_i1|m.6368/c110957_g10_i2|m.91664/c110957_g10_i1|m.91663/c62392_g2_i1|m.6369/c111161_g2_i1|m.93500/c76564_g3_i1|m.10483/c74991_g1_i1|m.10091/c124578_g1_i1|m.97119/c105091_g1_…	28
GO:0001725	stress fiber	7/3804	21/43701	0.00146268	0.0152326	0.0135472	c72524_g3_i1|m.9634/c36762_g1_i1|m.3884/c63845_g2_i1|m.6737/c162256_g1_i1|m.100728/c24515_g1_i1|m.2633/c46265_g1_i1|m.5024/c174246_g1_i1|m.101760	7
GO:0097517	contractile actin filament bundle	7/3804	21/43701	0.00146268	0.0152326	0.0135472	c72524_g3_i1|m.9634/c36762_g1_i1|m.3884/c63845_g2_i1|m.6737/c162256_g1_i1|m.100728/c24515_g1_i1|m.2633/c46265_g1_i1|m.5024/c174246_g1_i1|m.101760	7
GO:0034035	purine ribonucleoside bisphosphate metabolic process	18/3804	96/43701	0.00146935	0.0152556	0.0135677	c111115_g3_i3|m.93122/c111115_g3_i7|m.93141/c104484_g2_i8|m.49566/c104484_g2_i6|m.49556/c104914_g5_i2|m.51528/c111025_g2_i8|m.92308/c98135_g2_i3|m.28780/c110606_g1_i5|m.88551/c110606_g1_i8|m.88555/c110233_g1_i3|m.85434/c110957_g7_i3|m.91660/c110957_g7_i1|m.91658/c62392_g1_i1|m.6368/c182945_g1_i1|m.102852/c110957_g10_i1|m.91663/c107738_g1_i1|m.67664/c110731_g2_i1|m.89636/c38564_g2_i1|m.4038	18
GO:0046222	aflatoxin metabolic process	5/3804	11/43701	0.00147067	0.0152556	0.0135677	c70219_g1_i1|m.8579/c145734_g1_i1|m.98958/c10575_g1_i1|m.902/c98271_g1_i2|m.29054/c97730_g1_i1|m.27870	5
GO:1901018	positive regulation of potassium ion transmembrane transporter activity	10/3804	39/43701	0.00148637	0.0153883	0.0136857	c101230_g2_i3|m.37065/c110875_g1_i3|m.90985/c101230_g3_i2|m.37056/c109550_g1_i7|m.80269/c110926_g1_i6|m.91441/c110926_g1_i4|m.91437/c105922_g3_i1|m.56788/c110731_g1_i6|m.89644/c107738_g1_i1|m.67664/c107738_g1_i4|m.67668	10
GO:0009696	salicylic acid metabolic process	34/3804	229/43701	0.00153001	0.0158091	0.0140599	c108175_g4_i1|m.70621/c105245_g12_i1|m.53306/c107464_g5_i1|m.65802/c75972_g1_i1|m.10328/c107464_g7_i1|m.65807/c107464_g2_i1|m.65801/c109563_g2_i1|m.80388/c109774_g1_i8|m.81825/c109774_g1_i1|m.81817/c109774_g1_i10|m.81827/c105766_g4_i1|m.55954/c109563_g2_i11|m.80402/c109563_g2_i10|m.80401/c109563_g2_i4|m.80393/c106807_g1_i1|m.61726/c107361_g1_i3|m.65119/c108175_g4_i4|m.70624/c109214_g2_i3|m.77806/…	34
GO:0010448	vegetative meristem growth	6/3804	16/43701	0.00161033	0.0165742	0.0147403	c106523_g1_i1|m.60018/c106523_g2_i1|m.60020/c106523_g4_i1|m.60022/c106523_g7_i1|m.60024/c106552_g1_i5|m.60177/c122388_g1_i1|m.96868	6
GO:0016297	acyl-[acyl-carrier-protein] hydrolase activity	6/3804	16/43701	0.00161033	0.0165742	0.0147403	c102184_g1_i1|m.40178/c102184_g1_i2|m.40179/c73635_g1_i1|m.9850/c94271_g1_i1|m.21352/c94271_g2_i1|m.21353/c94271_g2_i2|m.21354	6
GO:0045214	sarcomere organization	12/3804	53/43701	0.0016874	0.0173336	0.0154157	c154994_g1_i1|m.100054/c8278_g1_i2|m.642/c36762_g1_i1|m.3884/c184345_g1_i1|m.102895/c33420_g1_i1|m.3683/c127872_g1_i1|m.97428/c127519_g1_i1|m.97395/c152080_g1_i1|m.99794/c131658_g1_i1|m.97629/c153413_g1_i1|m.99932/c174246_g1_i1|m.101760/c41491_g2_i1|m.4550	12
GO:0007351	tripartite regional subdivision	16/3804	82/43701	0.00171135	0.0175115	0.0155739	c109536_g2_i4|m.80076/c111090_g1_i1|m.92876/c106561_g1_i1|m.60221/c110876_g2_i4|m.91004/c109369_g2_i1|m.78832/c109141_g4_i2|m.77327/c76736_g2_i1|m.10533/c111246_g1_i4|m.94192/c111251_g1_i1|m.94217/c109336_g2_i2|m.78590/c110699_g3_i1|m.89418/c110876_g2_i2|m.91002/c102673_g2_i4|m.41973/c110428_g2_i1|m.86954/c105930_g2_i1|m.56817/c140384_g1_i1|m.98628	16
GO:0008595	anterior/posterior axis specification, embryo	16/3804	82/43701	0.00171135	0.0175115	0.0155739	c109536_g2_i4|m.80076/c111090_g1_i1|m.92876/c106561_g1_i1|m.60221/c110876_g2_i4|m.91004/c109369_g2_i1|m.78832/c109141_g4_i2|m.77327/c76736_g2_i1|m.10533/c111246_g1_i4|m.94192/c111251_g1_i1|m.94217/c109336_g2_i2|m.78590/c110699_g3_i1|m.89418/c110876_g2_i2|m.91002/c102673_g2_i4|m.41973/c110428_g2_i1|m.86954/c105930_g2_i1|m.56817/c140384_g1_i1|m.98628	16
GO:0034764	positive regulation of transmembrane transport	26/3804	162/43701	0.00172809	0.0176486	0.0156959	c101230_g2_i3|m.37065/c104914_g5_i2|m.51528/c110875_g1_i3|m.90985/c90107_g1_i1|m.17049/c101230_g3_i2|m.37056/c110408_g2_i1|m.86753/c109550_g1_i7|m.80269/c101007_g1_i1|m.36407/c108589_g1_i1|m.73594/c110926_g1_i1|m.91432/c105922_g2_i1|m.56787/c110926_g1_i6|m.91441/c110926_g1_i4|m.91437/c107470_g3_i2|m.65850/c105922_g3_i1|m.56788/c110926_g2_i2|m.91440/c110926_g2_i1|m.91434/c62392_g1_i1|m.6368/c11095…	26
GO:0043001	Golgi to plasma membrane protein transport	17/3804	90/43701	0.00180615	0.0184102	0.0163732	c110875_g1_i3|m.90985/c90107_g1_i1|m.17049/c101230_g3_i2|m.37056/c110408_g2_i1|m.86753/c101007_g1_i1|m.36407/c108589_g1_i1|m.73594/c110926_g1_i1|m.91432/c105922_g2_i1|m.56787/c110926_g1_i4|m.91437/c105922_g3_i1|m.56788/c110926_g2_i2|m.91440/c110926_g2_i1|m.91434/c62392_g1_i1|m.6368/c110957_g10_i2|m.91664/c110731_g1_i6|m.89644/c74702_g2_i1|m.9996/c110266_g5_i1|m.85714	17
GO:0086002	cardiac muscle cell action potential involved in contraction	10/3804	40/43701	0.00182913	0.0185016	0.0164545	c101230_g2_i3|m.37065/c110875_g1_i3|m.90985/c101230_g3_i2|m.37056/c109550_g1_i7|m.80269/c110926_g1_i6|m.91441/c110926_g1_i4|m.91437/c105922_g3_i1|m.56788/c110731_g1_i6|m.89644/c107738_g1_i1|m.67664/c107738_g1_i4|m.67668	10
GO:0086014	atrial cardiac muscle cell action potential	10/3804	40/43701	0.00182913	0.0185016	0.0164545	c101230_g2_i3|m.37065/c110875_g1_i3|m.90985/c101230_g3_i2|m.37056/c109550_g1_i7|m.80269/c110926_g1_i6|m.91441/c110926_g1_i4|m.91437/c105922_g3_i1|m.56788/c110731_g1_i6|m.89644/c107738_g1_i1|m.67664/c107738_g1_i4|m.67668	10
GO:0086026	atrial cardiac muscle cell to AV node cell signaling	10/3804	40/43701	0.00182913	0.0185016	0.0164545	c101230_g2_i3|m.37065/c110875_g1_i3|m.90985/c101230_g3_i2|m.37056/c109550_g1_i7|m.80269/c110926_g1_i6|m.91441/c110926_g1_i4|m.91437/c105922_g3_i1|m.56788/c110731_g1_i6|m.89644/c107738_g1_i1|m.67664/c107738_g1_i4|m.67668	10
GO:0086066	atrial cardiac muscle cell to AV node cell communication	10/3804	40/43701	0.00182913	0.0185016	0.0164545	c101230_g2_i3|m.37065/c110875_g1_i3|m.90985/c101230_g3_i2|m.37056/c109550_g1_i7|m.80269/c110926_g1_i6|m.91441/c110926_g1_i4|m.91437/c105922_g3_i1|m.56788/c110731_g1_i6|m.89644/c107738_g1_i1|m.67664/c107738_g1_i4|m.67668	10
GO:0001738	morphogenesis of a polarized epithelium	26/3804	163/43701	0.00188905	0.019071	0.0169609	c103773_g1_i2|m.46529/c109550_g2_i1|m.80257/c106908_g2_i4|m.62392/c110755_g1_i3|m.89895/c3651_g2_i1|m.296/c154994_g1_i1|m.100054/c109536_g2_i4|m.80076/c111090_g1_i1|m.92876/c106561_g1_i1|m.60221/c110876_g2_i4|m.91004/c109369_g2_i1|m.78832/c109141_g4_i2|m.77327/c76736_g2_i1|m.10533/c111246_g1_i4|m.94192/c111251_g1_i1|m.94217/c109336_g2_i2|m.78590/c110699_g3_i1|m.89418/c110876_g2_i2|m.91002/c24515_…	26
GO:0051170	nuclear import	56/3804	433/43701	0.00191329	0.0192581	0.0171273	c18531_g1_i1|m.2009/c109550_g2_i1|m.80257/c3651_g2_i1|m.296/c154994_g1_i1|m.100054/c106627_g5_i1|m.60652/c93238_g3_i1|m.20049/c105064_g1_i3|m.52303/c105064_g1_i10|m.52316/c105064_g1_i12|m.52320/c105064_g1_i4|m.52305/c181763_g1_i1|m.102764/c137846_g1_i1|m.98382/c90961_g1_i2|m.17881/c77377_g1_i1|m.10750/c59126_g1_i1|m.5767/c120581_g1_i1|m.96525/c100693_g1_i5|m.35528/c101176_g1_i1|m.36895/c101176_g1…	56
GO:0010022	meristem determinacy	14/3804	68/43701	0.00191487	0.0192581	0.0171273	c110575_g1_i23|m.88250/c66877_g1_i1|m.7632/c96792_g1_i2|m.25655/c94959_g1_i2|m.22463/c94959_g1_i4|m.22465/c101562_g1_i1|m.38151/c105130_g2_i1|m.52732/c105130_g3_i1|m.52734/c108642_g1_i12|m.73938/c108642_g1_i2|m.73932/c108707_g4_i1|m.74347/c98413_g1_i1|m.29402/c98413_g1_i2|m.29403/c56364_g1_i1|m.5642	14
GO:0007309	oocyte axis specification	16/3804	83/43701	0.00195161	0.0195791	0.0174127	c109536_g2_i4|m.80076/c111090_g1_i1|m.92876/c106561_g1_i1|m.60221/c110876_g2_i4|m.91004/c109369_g2_i1|m.78832/c109141_g4_i2|m.77327/c76736_g2_i1|m.10533/c111246_g1_i4|m.94192/c111251_g1_i1|m.94217/c109336_g2_i2|m.78590/c110699_g3_i1|m.89418/c110876_g2_i2|m.91002/c102673_g2_i4|m.41973/c110428_g2_i1|m.86954/c105930_g2_i1|m.56817/c140384_g1_i1|m.98628	16
GO:0048832	specification of organ number	11/3804	47/43701	0.00195791	0.0195791	0.0174127	c87006_g3_i1|m.15089/c98004_g5_i1|m.28465/c105177_g1_i5|m.52954/c107187_g1_i2|m.63916/c109183_g6_i1|m.77650/c107529_g6_i1|m.66187/c111169_g6_i1|m.93569/c109688_g6_i1|m.81162/c109916_g3_i1|m.82939/c109950_g4_i1|m.83195/c86683_g1_i2|m.14821	11
GO:0048833	specification of floral organ number	11/3804	47/43701	0.00195791	0.0195791	0.0174127	c87006_g3_i1|m.15089/c98004_g5_i1|m.28465/c105177_g1_i5|m.52954/c107187_g1_i2|m.63916/c109183_g6_i1|m.77650/c107529_g6_i1|m.66187/c111169_g6_i1|m.93569/c109688_g6_i1|m.81162/c109916_g3_i1|m.82939/c109950_g4_i1|m.83195/c86683_g1_i2|m.14821	11
GO:0003206	cardiac chamber morphogenesis	7/3804	22/43701	0.00198537	0.0197788	0.0175903	c72524_g3_i1|m.9634/c36762_g1_i1|m.3884/c60241_g1_i1|m.5980/c24515_g1_i1|m.2633/c162075_g1_i1|m.100681/c153397_g1_i1|m.99927/c153413_g1_i1|m.99932	7
GO:0005366	myo-inositol:proton symporter activity	7/3804	22/43701	0.00198537	0.0197788	0.0175903	c101332_g5_i1|m.37410/c104098_g2_i5|m.47870/c108697_g1_i1|m.74263/c109841_g6_i1|m.82328/c17960_g1_i1|m.1884/c105557_g1_i1|m.54891/c76798_g1_i1|m.10570	7
GO:0015791	polyol transport	8/3804	28/43701	0.00207571	0.0206399	0.0183562	c101332_g5_i1|m.37410/c104098_g2_i5|m.47870/c108697_g1_i1|m.74263/c109841_g6_i1|m.82328/c17960_g1_i1|m.1884/c105557_g1_i1|m.54891/c76798_g1_i1|m.10570/c82736_g1_i1|m.12475	8
GO:0005923	bicellular tight junction	15/3804	76/43701	0.00209012	0.0207051	0.0184142	c109536_g2_i4|m.80076/c111090_g1_i1|m.92876/c106561_g1_i1|m.60221/c110876_g2_i4|m.91004/c109369_g2_i1|m.78832/c109141_g4_i2|m.77327/c76736_g2_i1|m.10533/c111246_g1_i4|m.94192/c111251_g1_i1|m.94217/c109336_g2_i2|m.78590/c110699_g3_i1|m.89418/c110876_g2_i2|m.91002/c102673_g2_i4|m.41973/c110428_g2_i1|m.86954/c105930_g2_i1|m.56817	15
GO:0070160	occluding junction	15/3804	76/43701	0.00209012	0.0207051	0.0184142	c109536_g2_i4|m.80076/c111090_g1_i1|m.92876/c106561_g1_i1|m.60221/c110876_g2_i4|m.91004/c109369_g2_i1|m.78832/c109141_g4_i2|m.77327/c76736_g2_i1|m.10533/c111246_g1_i4|m.94192/c111251_g1_i1|m.94217/c109336_g2_i2|m.78590/c110699_g3_i1|m.89418/c110876_g2_i2|m.91002/c102673_g2_i4|m.41973/c110428_g2_i1|m.86954/c105930_g2_i1|m.56817	15
GO:0009410	response to xenobiotic stimulus	22/3804	131/43701	0.00210336	0.0207584	0.0184616	c105756_g1_i1|m.55878/c105756_g1_i2|m.55880/c105756_g1_i3|m.55881/c24214_g1_i1|m.2588/c105756_g1_i4|m.55882/c105756_g2_i1|m.55884/c106171_g2_i1|m.57973/c106171_g4_i1|m.57974/c135692_g1_i1|m.98095/c70219_g1_i1|m.8579/c145734_g1_i1|m.98958/c67767_g3_i1|m.7852/c61719_g2_i1|m.6146/c95139_g2_i1|m.22766/c106171_g4_i3|m.57977/c106171_g4_i2|m.57976/c106171_g4_i4|m.57978/c106171_g6_i1|m.57979/c108212_g1_i…	22
GO:0032205	negative regulation of telomere maintenance	22/3804	131/43701	0.00210336	0.0207584	0.0184616	c110930_g1_i2|m.91466/c111349_g1_i1|m.94968/c106303_g6_i1|m.58801/c106303_g6_i7|m.58806/c60947_g1_i1|m.6037/c105885_g2_i1|m.56583/c82703_g1_i1|m.12456/c105885_g2_i1|m.56584/c80545_g2_i1|m.11667/c62392_g1_i1|m.6368/c110957_g10_i2|m.91664/c110957_g10_i1|m.91663/c62392_g2_i1|m.6369/c111161_g2_i1|m.93500/c76564_g3_i1|m.10483/c74991_g1_i1|m.10091/c105091_g1_i2|m.52494/c135278_g1_i1|m.98017/c108341_g2_…	22
GO:0000002	mitochondrial genome maintenance	16/3804	84/43701	0.00221939	0.021822	0.0194075	c110930_g1_i2|m.91466/c111349_g1_i1|m.94968/c106303_g6_i1|m.58801/c106303_g6_i7|m.58806/c60947_g1_i1|m.6037/c105885_g2_i1|m.56583/c82703_g1_i1|m.12456/c105885_g2_i1|m.56584/c80545_g2_i1|m.11667/c111161_g2_i1|m.93500/c76564_g3_i1|m.10483/c74991_g1_i1|m.10091/c105091_g1_i2|m.52494/c135278_g1_i1|m.98017/c108341_g2_i1|m.71798/c96785_g1_i1|m.25640	16
GO:0007308	oocyte construction	16/3804	84/43701	0.00221939	0.021822	0.0194075	c109536_g2_i4|m.80076/c111090_g1_i1|m.92876/c106561_g1_i1|m.60221/c110876_g2_i4|m.91004/c109369_g2_i1|m.78832/c109141_g4_i2|m.77327/c76736_g2_i1|m.10533/c111246_g1_i4|m.94192/c111251_g1_i1|m.94217/c109336_g2_i2|m.78590/c110699_g3_i1|m.89418/c110876_g2_i2|m.91002/c102673_g2_i4|m.41973/c110428_g2_i1|m.86954/c105930_g2_i1|m.56817/c140384_g1_i1|m.98628	16
GO:0086019	cell-cell signaling involved in cardiac conduction	10/3804	41/43701	0.00223298	0.0219147	0.01949	c101230_g2_i3|m.37065/c110875_g1_i3|m.90985/c101230_g3_i2|m.37056/c109550_g1_i7|m.80269/c110926_g1_i6|m.91441/c110926_g1_i4|m.91437/c105922_g3_i1|m.56788/c110731_g1_i6|m.89644/c107738_g1_i1|m.67664/c107738_g1_i4|m.67668	10
GO:0007164	establishment of tissue polarity	26/3804	165/43701	0.00224972	0.0220381	0.0195997	c103773_g1_i2|m.46529/c109550_g2_i1|m.80257/c106908_g2_i4|m.62392/c110755_g1_i3|m.89895/c3651_g2_i1|m.296/c154994_g1_i1|m.100054/c109536_g2_i4|m.80076/c111090_g1_i1|m.92876/c106561_g1_i1|m.60221/c110876_g2_i4|m.91004/c109369_g2_i1|m.78832/c109141_g4_i2|m.77327/c76736_g2_i1|m.10533/c111246_g1_i4|m.94192/c111251_g1_i1|m.94217/c109336_g2_i2|m.78590/c110699_g3_i1|m.89418/c110876_g2_i2|m.91002/c24515_…	26
GO:0051117	ATPase binding	23/3804	140/43701	0.0022688	0.0221838	0.0197292	c101230_g2_i3|m.37065/c110875_g1_i3|m.90985/c90107_g1_i1|m.17049/c101230_g3_i2|m.37056/c109550_g1_i7|m.80269/c110926_g1_i6|m.91441/c110926_g1_i4|m.91437/c107470_g3_i6|m.65857/c105922_g3_i1|m.56788/c110926_g2_i2|m.91440/c110926_g2_i1|m.91434/c62392_g1_i1|m.6368/c110731_g1_i3|m.89639/c110731_g1_i4|m.89640/c110731_g1_i6|m.89644/c107738_g1_i1|m.67664/c107738_g1_i4|m.67668/c33420_g1_i1|m.3683/c107470_…	23
GO:0030600	feruloyl esterase activity	5/3804	12/43701	0.002341	0.0227003	0.0201886	c17262_g2_i1|m.1797/c67767_g1_i1|m.7851/c67767_g3_i1|m.7852/c7990_g1_i1|m.578/c7990_g1_i2|m.579	5
GO:0045105	intermediate filament polymerization or depolymerization	5/3804	12/43701	0.002341	0.0227003	0.0201886	c110876_g2_i4|m.91004/c70800_g1_i2|m.8707/c111246_g1_i4|m.94192/c106262_g1_i2|m.58648/c110699_g3_i1|m.89418	5
GO:0045108	regulation of intermediate filament polymerization or depolymerization	5/3804	12/43701	0.002341	0.0227003	0.0201886	c110876_g2_i4|m.91004/c70800_g1_i2|m.8707/c111246_g1_i4|m.94192/c106262_g1_i2|m.58648/c110699_g3_i1|m.89418	5
GO:0055003	cardiac myofibril assembly	5/3804	12/43701	0.002341	0.0227003	0.0201886	c60241_g1_i1|m.5980/c24515_g1_i1|m.2633/c131658_g1_i1|m.97629/c174246_g1_i1|m.101760/c41491_g2_i1|m.4550	5
GO:0010451	floral meristem growth	11/3804	48/43701	0.00234311	0.0227003	0.0201886	c87006_g3_i1|m.15089/c98004_g5_i1|m.28465/c66877_g1_i1|m.7632/c105177_g1_i5|m.52954/c107187_g1_i2|m.63916/c109183_g6_i1|m.77650/c107529_g6_i1|m.66187/c111169_g6_i1|m.93569/c109688_g6_i1|m.81162/c109950_g4_i1|m.83195/c86683_g1_i2|m.14821	11
GO:0044057	regulation of system process	28/3804	183/43701	0.00243474	0.0235447	0.0209396	c101230_g2_i3|m.37065/c110875_g1_i3|m.90985/c101230_g3_i2|m.37056/c109550_g1_i7|m.80269/c110926_g1_i6|m.91441/c110926_g1_i4|m.91437/c105922_g3_i1|m.56788/c154994_g1_i1|m.100054/c110731_g1_i6|m.89644/c107738_g1_i1|m.67664/c107738_g1_i4|m.67668/c35192_g2_i1|m.3753/c72524_g3_i1|m.9634/c36762_g1_i1|m.3884/c60241_g1_i1|m.5980/c24515_g1_i1|m.2633/c46265_g1_i1|m.5024/c162075_g1_i1|m.100681/c140384_g1_i1…	28
GO:0005365	myo-inositol transmembrane transporter activity	9/3804	35/43701	0.00248226	0.0239604	0.0213093	c101332_g5_i1|m.37410/c104098_g2_i5|m.47870/c108697_g1_i1|m.74263/c109841_g6_i1|m.82328/c17960_g1_i1|m.1884/c105557_g1_i1|m.54891/c86841_g1_i1|m.14958/c76798_g1_i1|m.10570/c82736_g1_i1|m.12475	9
GO:0016711	flavonoid 3'-monooxygenase activity	14/3804	70/43701	0.00254846	0.0245545	0.0218376	c103016_g4_i1|m.43177/c104983_g1_i1|m.51856/c109845_g1_i1|m.82367/c108549_g1_i2|m.73234/c103016_g2_i3|m.43175/c105137_g8_i2|m.52761/c105137_g9_i1|m.52764/c105224_g1_i1|m.53186/c105224_g1_i2|m.53188/c80470_g1_i1|m.11643/c103802_g1_i2|m.46653/c104002_g1_i2|m.47480/c104002_g1_i7|m.47483/c108243_g7_i1|m.71033	14
GO:0001751	compound eye photoreceptor cell differentiation	17/3804	93/43701	0.00259915	0.0249973	0.0222314	c109536_g2_i4|m.80076/c111090_g1_i1|m.92876/c106561_g1_i1|m.60221/c110876_g2_i4|m.91004/c109369_g2_i1|m.78832/c109141_g4_i2|m.77327/c76736_g2_i1|m.10533/c111246_g1_i4|m.94192/c111251_g1_i1|m.94217/c109336_g2_i2|m.78590/c110699_g3_i1|m.89418/c110876_g2_i2|m.91002/c102673_g2_i4|m.41973/c33420_g1_i1|m.3683/c127872_g1_i1|m.97428/c110428_g2_i1|m.86954/c105930_g2_i1|m.56817	17
GO:0007114	cell budding	7/3804	23/43701	0.00264159	0.0252589	0.0224641	c185948_g1_i1|m.102930/c82167_g1_i1|m.12143/c93910_g1_i1|m.20801/c85947_g1_i1|m.14251/c127810_g1_i1|m.97419/c62195_g3_i1|m.6306/c134240_g1_i1|m.97758	7
GO:0086016	AV node cell action potential	8/3804	29/43701	0.00265028	0.0252589	0.0224641	c101230_g2_i3|m.37065/c101230_g3_i2|m.37056/c110926_g1_i6|m.91441/c110926_g1_i4|m.91437/c105922_g3_i1|m.56788/c110731_g1_i6|m.89644/c107738_g1_i1|m.67664/c107738_g1_i4|m.67668	8
GO:0086027	AV node cell to bundle of His cell signaling	8/3804	29/43701	0.00265028	0.0252589	0.0224641	c101230_g2_i3|m.37065/c101230_g3_i2|m.37056/c110926_g1_i6|m.91441/c110926_g1_i4|m.91437/c105922_g3_i1|m.56788/c110731_g1_i6|m.89644/c107738_g1_i1|m.67664/c107738_g1_i4|m.67668	8
GO:0086067	AV node cell to bundle of His cell communication	8/3804	29/43701	0.00265028	0.0252589	0.0224641	c101230_g2_i3|m.37065/c101230_g3_i2|m.37056/c110926_g1_i6|m.91441/c110926_g1_i4|m.91437/c105922_g3_i1|m.56788/c110731_g1_i6|m.89644/c107738_g1_i1|m.67664/c107738_g1_i4|m.67668	8
GO:0098904	regulation of AV node cell action potential	8/3804	29/43701	0.00265028	0.0252589	0.0224641	c101230_g2_i3|m.37065/c101230_g3_i2|m.37056/c110926_g1_i6|m.91441/c110926_g1_i4|m.91437/c105922_g3_i1|m.56788/c110731_g1_i6|m.89644/c107738_g1_i1|m.67664/c107738_g1_i4|m.67668	8
GO:0086004	regulation of cardiac muscle cell contraction	10/3804	42/43701	0.00270544	0.0257382	0.0228904	c101230_g2_i3|m.37065/c110875_g1_i3|m.90985/c101230_g3_i2|m.37056/c109550_g1_i7|m.80269/c110926_g1_i6|m.91441/c110926_g1_i4|m.91437/c105922_g3_i1|m.56788/c110731_g1_i6|m.89644/c107738_g1_i1|m.67664/c107738_g1_i4|m.67668	10
GO:0031032	actomyosin structure organization	19/3804	110/43701	0.00295345	0.0279968	0.0248991	c109550_g2_i1|m.80257/c154994_g1_i1|m.100054/c8278_g1_i2|m.642/c36762_g1_i1|m.3884/c184345_g1_i1|m.102895/c162256_g1_i1|m.100728/c60241_g1_i1|m.5980/c24515_g1_i1|m.2633/c46265_g1_i1|m.5024/c33420_g1_i1|m.3683/c127872_g1_i1|m.97428/c96944_g1_i1|m.25902/c127519_g1_i1|m.97395/c152080_g1_i1|m.99794/c121784_g1_i1|m.96774/c131658_g1_i1|m.97629/c153413_g1_i1|m.99932/c174246_g1_i1|m.101760/c41491_g2_i1|m…	19
GO:0051972	regulation of telomerase activity	19/3804	110/43701	0.00295345	0.0279968	0.0248991	c110930_g1_i2|m.91466/c111349_g1_i1|m.94968/c106303_g6_i1|m.58801/c106303_g6_i7|m.58806/c60947_g1_i1|m.6037/c105885_g2_i1|m.56583/c105885_g2_i1|m.56584/c80545_g2_i1|m.11667/c110957_g10_i1|m.91663/c62392_g2_i1|m.6369/c111161_g2_i1|m.93500/c76564_g3_i1|m.10483/c74991_g1_i1|m.10091/c105091_g1_i2|m.52494/c135278_g1_i1|m.98017/c108341_g2_i1|m.71798/c96785_g1_i1|m.25640/c2238_g2_i1|m.119/c69874_g1_i1|m…	19
GO:0010229	inflorescence development	26/3804	169/43701	0.00314942	0.029801	0.0265036	c123324_g1_i1|m.96984/c73376_g1_i1|m.9813/c98004_g2_i1|m.28460/c105531_g4_i1|m.54790/c100431_g1_i1|m.34834/c109916_g1_i5|m.82933/c109916_g1_i4|m.82931/c109916_g1_i1|m.82919/c107529_g2_i1|m.66180/c111243_g2_i1|m.94168/c111243_g2_i2|m.94170/c81641_g1_i1|m.11915/c89991_g1_i1|m.16952/c95692_g2_i1|m.23817/c104139_g3_i1|m.48038/c104139_g3_i2|m.48039/c105177_g1_i5|m.52954/c111379_g3_i1|m.95225/c107775_g…	26
GO:0102160	cyanidin-3-O-glucoside 2-O-glucuronosyltransferase activity	6/3804	18/43701	0.00320714	0.0302928	0.0269411	c108342_g2_i2|m.71806/c90929_g1_i1|m.17855/c102440_g3_i3|m.41192/c102440_g3_i2|m.41191/c108342_g1_i2|m.71810/c106907_g2_i3|m.62386	6
GO:0048653	anther development	45/3804	340/43701	0.00323796	0.0305293	0.0271514	c98004_g5_i1|m.28465/c13355_g1_i1|m.1308/c109916_g2_i6|m.82935/c109916_g2_i2|m.82923/c109916_g2_i3|m.82928/c107529_g3_i1|m.66181/c101109_g1_i1|m.36687/c111243_g2_i2|m.94170/c124232_g1_i1|m.97076/c110767_g1_i2|m.89970/c85263_g1_i1|m.13782/c85263_g2_i1|m.13783/c81641_g1_i1|m.11915/c163295_g1_i1|m.100910/c14235_g1_i1|m.1407/c111270_g3_i8|m.94353/c100939_g1_i2|m.36240/c104117_g4_i1|m.47939/c107187_g1…	45
GO:0015459	potassium channel regulator activity	10/3804	43/43701	0.0032545	0.0305761	0.027193	c101230_g2_i3|m.37065/c101230_g3_i2|m.37056/c110926_g1_i6|m.91441/c110926_g1_i4|m.91437/c105922_g3_i1|m.56788/c110731_g1_i6|m.89644/c107738_g1_i1|m.67664/c107738_g1_i4|m.67668/c14437_g2_i1|m.1436/c80565_g1_i1|m.11673	10
GO:0086003	cardiac muscle cell contraction	10/3804	43/43701	0.0032545	0.0305761	0.027193	c101230_g2_i3|m.37065/c110875_g1_i3|m.90985/c101230_g3_i2|m.37056/c109550_g1_i7|m.80269/c110926_g1_i6|m.91441/c110926_g1_i4|m.91437/c105922_g3_i1|m.56788/c110731_g1_i6|m.89644/c107738_g1_i1|m.67664/c107738_g1_i4|m.67668	10
GO:0046425	regulation of JAK-STAT cascade	18/3804	103/43701	0.00329368	0.0308345	0.0274228	c109536_g2_i4|m.80076/c111090_g1_i1|m.92876/c106561_g1_i1|m.60221/c110876_g2_i4|m.91004/c109369_g2_i1|m.78832/c109141_g4_i2|m.77327/c76736_g2_i1|m.10533/c111246_g1_i4|m.94192/c111251_g1_i1|m.94217/c109336_g2_i2|m.78590/c110699_g3_i1|m.89418/c110876_g2_i2|m.91002/c102673_g2_i4|m.41973/c33420_g1_i1|m.3683/c127872_g1_i1|m.97428/c95634_g1_i1|m.23657/c110428_g2_i1|m.86954/c105930_g2_i1|m.56817	18
GO:1904892	regulation of STAT cascade	18/3804	103/43701	0.00329368	0.0308345	0.0274228	c109536_g2_i4|m.80076/c111090_g1_i1|m.92876/c106561_g1_i1|m.60221/c110876_g2_i4|m.91004/c109369_g2_i1|m.78832/c109141_g4_i2|m.77327/c76736_g2_i1|m.10533/c111246_g1_i4|m.94192/c111251_g1_i1|m.94217/c109336_g2_i2|m.78590/c110699_g3_i1|m.89418/c110876_g2_i2|m.91002/c102673_g2_i4|m.41973/c33420_g1_i1|m.3683/c127872_g1_i1|m.97428/c95634_g1_i1|m.23657/c110428_g2_i1|m.86954/c105930_g2_i1|m.56817	18
GO:0046933	proton-transporting ATP synthase activity, rotational mechanism	8/3804	30/43701	0.00334182	0.0312298	0.0277743	c12978_g1_i1|m.1231/c13157_g1_i1|m.1270/c7695_g1_i1|m.549/c155575_g1_i1|m.100111/c85648_g1_i1|m.13991/c174266_g1_i1|m.101766/c134463_g1_i1|m.97797/c137966_g1_i1|m.98398	8
GO:0003009	skeletal muscle contraction	7/3804	24/43701	0.00345224	0.0322046	0.0286413	c72524_g3_i1|m.9634/c162075_g1_i1|m.100681/c153397_g1_i1|m.99927/c8633_g1_i1|m.695/c2238_g2_i1|m.119/c69874_g1_i1|m.8364/c41491_g2_i1|m.4550	7
GO:0043296	apical junction complex	15/3804	80/43701	0.00351294	0.0327131	0.0290935	c109536_g2_i4|m.80076/c111090_g1_i1|m.92876/c106561_g1_i1|m.60221/c110876_g2_i4|m.91004/c109369_g2_i1|m.78832/c109141_g4_i2|m.77327/c76736_g2_i1|m.10533/c111246_g1_i4|m.94192/c111251_g1_i1|m.94217/c109336_g2_i2|m.78590/c110699_g3_i1|m.89418/c110876_g2_i2|m.91002/c102673_g2_i4|m.41973/c110428_g2_i1|m.86954/c105930_g2_i1|m.56817	15
GO:0039657	suppression by virus of host gene expression	5/3804	13/43701	0.00353298	0.0327841	0.0291567	c106627_g5_i1|m.60652/c137846_g1_i1|m.98382/c90961_g1_i2|m.17881/c97949_g1_i2|m.28359/c110093_g2_i2|m.84318	5
GO:0097493	structural molecule activity conferring elasticity	5/3804	13/43701	0.00353298	0.0327841	0.0291567	c110648_g4_i1|m.88940/c131658_g1_i1|m.97629/c153413_g1_i1|m.99932/c174246_g1_i1|m.101760/c41491_g2_i1|m.4550	5
GO:0035220	wing disc development	19/3804	112/43701	0.00363271	0.0336503	0.0299271	c109691_g1_i1|m.81172/c62392_g2_i1|m.6369/c109536_g2_i4|m.80076/c111090_g1_i1|m.92876/c106561_g1_i1|m.60221/c110876_g2_i4|m.91004/c109369_g2_i1|m.78832/c109141_g4_i2|m.77327/c76736_g2_i1|m.10533/c111246_g1_i4|m.94192/c111251_g1_i1|m.94217/c109336_g2_i2|m.78590/c110699_g3_i1|m.89418/c110876_g2_i2|m.91002/c24515_g1_i1|m.2633/c102673_g2_i4|m.41973/c110428_g2_i1|m.86954/c105930_g2_i1|m.56817/c140384_…	19
GO:0035120	post-embryonic appendage morphogenesis	17/3804	96/43701	0.00366266	0.0338684	0.030121	c109536_g2_i4|m.80076/c111090_g1_i1|m.92876/c106561_g1_i1|m.60221/c110876_g2_i4|m.91004/c109369_g2_i1|m.78832/c109141_g4_i2|m.77327/c76736_g2_i1|m.10533/c111246_g1_i4|m.94192/c111251_g1_i1|m.94217/c109336_g2_i2|m.78590/c110699_g3_i1|m.89418/c110876_g2_i2|m.91002/c24515_g1_i1|m.2633/c102673_g2_i4|m.41973/c110428_g2_i1|m.86954/c105930_g2_i1|m.56817/c140384_g1_i1|m.98628	17
GO:0045259	proton-transporting ATP synthase complex	9/3804	37/43701	0.00373302	0.0344586	0.0306459	c12978_g1_i1|m.1231/c13157_g1_i1|m.1270/c7695_g1_i1|m.549/c155575_g1_i1|m.100111/c85648_g1_i1|m.13991/c174266_g1_i1|m.101766/c134463_g1_i1|m.97797/c137966_g1_i1|m.98398/c76511_g1_i1|m.10469	9
GO:0035114	imaginal disc-derived appendage morphogenesis	17/3804	97/43701	0.00408826	0.0376719	0.0335037	c109536_g2_i4|m.80076/c111090_g1_i1|m.92876/c106561_g1_i1|m.60221/c110876_g2_i4|m.91004/c109369_g2_i1|m.78832/c109141_g4_i2|m.77327/c76736_g2_i1|m.10533/c111246_g1_i4|m.94192/c111251_g1_i1|m.94217/c109336_g2_i2|m.78590/c110699_g3_i1|m.89418/c110876_g2_i2|m.91002/c24515_g1_i1|m.2633/c102673_g2_i4|m.41973/c110428_g2_i1|m.86954/c105930_g2_i1|m.56817/c140384_g1_i1|m.98628	17
GO:0097546	ciliary base	8/3804	31/43701	0.00416543	0.0383161	0.0340766	c110408_g2_i1|m.86753/c110606_g1_i5|m.88551/c110606_g1_i9|m.88557/c110606_g1_i8|m.88555/c110233_g1_i1|m.85431/c107738_g2_i1|m.67667/c140384_g1_i1|m.98628/c41934_g1_i1|m.4629	8
GO:0048029	monosaccharide binding	14/3804	74/43701	0.00433421	0.0397634	0.0353637	c101546_g4_i3|m.38066/c97592_g1_i1|m.27581/c101546_g4_i1|m.38064/c85995_g1_i1|m.14293/c105113_g1_i1|m.52608/c160715_g1_i1|m.100361/c90723_g1_i1|m.17652/c71581_g1_i1|m.9161/c147336_g1_i1|m.99021/c102486_g1_i1|m.41303/c110406_g2_i2|m.86744/c110406_g2_i4|m.86746/c92742_g1_i1|m.19526/c948_g1_i1|m.55	14
GO:0048013	ephrin receptor signaling pathway	6/3804	19/43701	0.00434568	0.0397634	0.0353637	c105922_g3_i1|m.56788/c40479_g1_i1|m.4323/c94737_g2_i1|m.22113/c162256_g1_i1|m.100728/c33420_g1_i1|m.3683/c93830_g1_i2|m.20701	6
GO:0097543	ciliary inversin compartment	6/3804	19/43701	0.00434568	0.0397634	0.0353637	c110408_g2_i1|m.86753/c110606_g1_i5|m.88551/c110606_g1_i9|m.88557/c110606_g1_i8|m.88555/c110233_g1_i1|m.85431/c107738_g2_i1|m.67667	6
GO:0048546	digestive tract morphogenesis	12/3804	59/43701	0.00435288	0.0397634	0.0353637	c103773_g1_i2|m.46529/c109691_g4_i1|m.81176/c106908_g2_i4|m.62392/c110755_g1_i3|m.89895/c110876_g2_i4|m.91004/c70800_g1_i2|m.8707/c111246_g1_i4|m.94192/c106262_g1_i2|m.58648/c110699_g3_i1|m.89418/c59668_g1_i1|m.5864/c98372_g2_i1|m.29286/c98372_g2_i6|m.29292	12
GO:0042641	actomyosin	7/3804	25/43701	0.00443913	0.0404812	0.0360021	c72524_g3_i1|m.9634/c36762_g1_i1|m.3884/c63845_g2_i1|m.6737/c162256_g1_i1|m.100728/c24515_g1_i1|m.2633/c46265_g1_i1|m.5024/c174246_g1_i1|m.101760	7
GO:0007411	axon guidance	16/3804	90/43701	0.00454557	0.0413803	0.0368018	c110875_g1_i3|m.90985/c90107_g1_i1|m.17049/c101230_g3_i2|m.37056/c101007_g1_i1|m.36407/c108589_g1_i1|m.73594/c110926_g1_i1|m.91432/c105922_g2_i1|m.56787/c110926_g1_i4|m.91437/c110926_g2_i2|m.91440/c110926_g2_i1|m.91434/c62392_g1_i1|m.6368/c110731_g1_i6|m.89644/c110731_g2_i1|m.89636/c74702_g2_i1|m.9996/c110266_g5_i1|m.85714/c109761_g1_i6|m.81722	16
GO:0016459	myosin complex	14/3804	75/43701	0.00491083	0.0446286	0.0396906	c15104_g1_i1|m.1551/c72524_g3_i1|m.9634/c8278_g1_i2|m.642/c154915_g1_i1|m.100049/c36762_g1_i1|m.3884/c184345_g1_i1|m.102895/c162256_g1_i1|m.100728/c60241_g1_i1|m.5980/c24515_g1_i1|m.2633/c46265_g1_i1|m.5024/c131658_g1_i1|m.97629/c153413_g1_i1|m.99932/c174246_g1_i1|m.101760/c41491_g2_i1|m.4550	14
GO:0000771	agglutination involved in conjugation	5/3804	14/43701	0.00510502	0.0462341	0.0411185	c97592_g1_i1|m.27581/c101546_g4_i1|m.38064/c85995_g1_i1|m.14293/c110406_g2_i2|m.86744/c110406_g2_i4|m.86746	5
GO:0039656	modulation by virus of host gene expression	5/3804	14/43701	0.00510502	0.0462341	0.0411185	c106627_g5_i1|m.60652/c137846_g1_i1|m.98382/c90961_g1_i2|m.17881/c97949_g1_i2|m.28359/c110093_g2_i2|m.84318	5
GO:0086036	regulation of cardiac muscle cell membrane potential	8/3804	32/43701	0.00513678	0.0464422	0.0413035	c101230_g2_i3|m.37065/c101230_g3_i2|m.37056/c110926_g1_i6|m.91441/c110926_g1_i4|m.91437/c105922_g3_i1|m.56788/c110731_g1_i6|m.89644/c107738_g1_i1|m.67664/c107738_g1_i4|m.67668	8
GO:0010080	regulation of floral meristem growth	10/3804	46/43701	0.00544709	0.0490796	0.0436491	c87006_g3_i1|m.15089/c98004_g5_i1|m.28465/c105177_g1_i5|m.52954/c107187_g1_i2|m.63916/c109183_g6_i1|m.77650/c107529_g6_i1|m.66187/c111169_g6_i1|m.93569/c109688_g6_i1|m.81162/c109950_g4_i1|m.83195/c86683_g1_i2|m.14821	10
GO:0051447	negative regulation of meiotic cell cycle	10/3804	46/43701	0.00544709	0.0490796	0.0436491	c105113_g1_i1|m.52608/c160715_g1_i1|m.100361/c90723_g1_i1|m.17652/c71581_g1_i1|m.9161/c147336_g1_i1|m.99021/c163418_g1_i1|m.100927/c99196_g1_i1|m.31537/c73312_g2_i1|m.9783/c140384_g1_i1|m.98628/c41934_g1_i1|m.4629	10
GO:0010225	response to UV-C	21/3804	133/43701	0.00550197	0.0494897	0.0440138	c108175_g4_i1|m.70621/c105245_g12_i1|m.53306/c107464_g5_i1|m.65802/c75972_g1_i1|m.10328/c107464_g7_i1|m.65807/c107464_g2_i1|m.65801/c109563_g2_i1|m.80388/c109774_g1_i8|m.81825/c109774_g1_i1|m.81817/c109774_g1_i10|m.81827/c109563_g2_i11|m.80402/c109563_g2_i10|m.80401/c109563_g2_i4|m.80393/c106807_g1_i1|m.61726/c107361_g1_i3|m.65119/c108175_g4_i4|m.70624/c109214_g2_i3|m.77806/c109214_g5_i1|m.77807/…	21
