# Supplementary material for: In-depth transcriptome characterization uncovers distinct gene family expansions for Cupressus gigantea important to this long-lived species’ adaptability to environmental cues
Source: BMC Genomics. 2019 Mar 13;20:213. doi: 10.1186/s12864-019-5584-6 (PMC6417167; doi:10.1186/s12864-019-5584-6)
Supplement: Supplementary file 15 — Figure S8. Multiple sequence alignment (MSA) of the USPA-like domains of the putative USPA protein. The annotation was done based on conserved features of 1MJH secondary structure (five β strands and four α helices). (PDF 6074 kb) [file 12864_2019_5584_MOESM15_ESM.pdf]

|               | β1 |   |   |   |   | α1 |   |   |   |   | β2 |   |   |   |   | α2 |   |   |   |   | β3 |   |   |   |   | α3 |   |   |   |   | β4 |   |   |   |   | α4 |   |   |   |   | β5 |   |   |   |   |     |   |   |   |   |     |   |   |   |   |   |   |   |   |   |   |   |   |   |   |   |   |   |   |   |   |   |   |   |   |   |   |   |   |   |   |   |   |   |   |   |   |   |   |   |   |   |   |   |   |   |   |   |   |   |   |   |   |   |   |   |   |   |   |   |   |   |   |   |   |
|---------------|----|---|---|---|---|----|---|---|---|---|----|---|---|---|---|----|---|---|---|---|----|---|---|---|---|----|---|---|---|---|----|---|---|---|---|----|---|---|---|---|----|---|---|---|---|-----|---|---|---|---|-----|---|---|---|---|---|---|---|---|---|---|---|---|---|---|---|---|---|---|---|---|---|---|---|---|---|---|---|---|---|---|---|---|---|---|---|---|---|---|---|---|---|---|---|---|---|---|---|---|---|---|---|---|---|---|---|---|---|---|---|---|---|---|---|---|
|               | 10 |   |   |   |   | 20 |   |   |   |   | 30 |   |   |   |   | 40 |   |   |   |   | 50 |   |   |   |   | 60 |   |   |   |   | 70 |   |   |   |   | 80 |   |   |   |   | 90 |   |   |   |   | 100 |   |   |   |   | 110 |   |   |   |   |   |   |   |   |   |   |   |   |   |   |   |   |   |   |   |   |   |   |   |   |   |   |   |   |   |   |   |   |   |   |   |   |   |   |   |   |   |   |   |   |   |   |   |   |   |   |   |   |   |   |   |   |   |   |   |   |   |   |   |   |
| c100574_g1.i1 | K  | I | V | G | V | A  | L | D | F | S | P  | N | G | E | Y | A  | L | E | W | A | L  | Q | N | L | D | K  | V | Y | V | I | H  | V | K | H | A | L  | V | E | Q | L | R  | T | A | A | E | -   | - | E | K | G | -   | - | V | I | Y | V | K | V | Y | W | G | D | P | K | Q | K | L | C | S | A | V | T | D | L | G | L | N | L | L | V | V | G | Y | R | G | L | G | V | L | - | K | R | V | S | V | S | D | - | - | Y | V | V | S | N | A | C | P | V | T | V | V | K | S | P |   |
| c100574_g1.i2 | K  | I | V | G | V | A  | L | D | F | S | P  | N | G | E | Y | A  | L | E | W | A | L  | Q | N | L | D | K  | V | Y | V | I | H  | V | K | H | A | L  | V | E | Q | L | R  | T | A | A | E | -   | - | E | K | G | -   | - | V | I | Y | V | K | V | Y | W | G | D | P | K | Q | K | L | C | S | A | V | T | D | L | G | L | N | L | L | V | V | G | Y | R | G | L | G | V | L | - | K | R | V | S | V | S | D | - | - | Y | V | V | S | N | A | C | P | V | T | V | V | K | S | P |   |
| c100717_g1.i3 | R  | V | I | L | V | G  | M | D | E | S | E  | S | E | S | V | H  | A | L | Q | W | A  | L | S | H | L | D  | R | L | I | I | I  | H | V | T | R | K  | L | F | A | T | A  | M | E | K | C | N   | - | - | E | K | H   | - | - | V | Y | E | T | K | A | V | N | G | D | A | K | D | V | L | C | N | A | I | K | D | C | N | A | D | M | L | V | L | G | S | H | G | N | G | P | I | - | K | R | L | S | V | S | E | - | - | H | C | V | R | H | A | C | P | V | I | V | V | K | N | H |
| c101166_g3.i1 | K  | C | V | V | V | A  | V | D | G | S | E  | S | E | S | M | R  | A | L | E | W | A  | L | D | N | I | G  | T | F | V | V | L  | H | V | T | E | A  | I | M | T | H | A  | L | D | I | C | S   | - | - | Q | R | D   | - | - | A | V | E | K | K | V | V | I | G | E | P | K | E | L | I | C | E | T | S | K | L | Q | A | D | L | L | V | M | G | S | H | S | Y | G | A | L | - | K | R | M | S | V | S | N | - | - | Y | C | L | N | N | A | C | P | V | T | I | V | K | S | S |   |
| c101625_g2.i3 | R  | K | I | M | V | A  | V | D | E | S | E  | S | E | S | M | Y  | A | L | S | W | A  | L | D | F | L | D  | T | L | V | L | L  | R | A | T | E | N  | V | L | E | K | A  | K | R | I | C | T   | - | - | G | K | N   | - | - | V | V | E | T | R | V | S | V | G | D | A | R | D | V | I | S | E | E | A | E | K | V | E | P | D | L | L | V | M | G | S | H | G | Y | G | A | I | - | K | R | A | S | V | S | D | - | - | Y | C | A | H | N | G | C | P | V | L | I | V | K | H | P |
| c101625_g2.i4 | R  | K | I | M | V | A  | V | D | E | S | E  | S | E | S | M | Y  | A | L | S | W | A  | L | D | F | L | D  | T | L | V | L | L  | R | A | T | E | N  | V | L | E | K | A  | K | R | I | C | T   | - | - | G | K | N   | - | - | V | V | E | T | R | V | S | V | G | D | A | R | D | V | I | S | E | E | A | E | K | V | E | P | D | L | L | V | M | G | S | H | G | Y | G | A | I | - | K | R | A | S | V | S | D | - | - | Y | C | A | H | N | G | C | P | V | L | I | V | K | H | P |
| c101625_g2.i5 | R  | K | I | M | V | A  | V | D | E | S | E  | S | E | S | M | Y  | A | L | S | W | A  | L | D | F | L | D  | T | L | V | L | L  | R | A | T | E | N  | V | L | E | K | A  | K | R | I | C | T   | - | - | G | K | N   | - | - | V | V | E | T | R | V | S | V | G | D | A | R | D | V | I | S | E | E | A | E | K | V | E | P | D | L | L | V | M | G | S | H | G | Y | G | A | I | - | K | R | A | S | V | S | D | - | - | Y | C | A | H | N | G | C | P | V | L | I | V | K | H | P |
| c101733_g1.i1 | T  | R | I | V | I | A  | V | N | Q | S | S  | S | S | S | K | N  | A | F | E | W | A  | I | K | K | L | F  | K | L | Y | I | L  | H | V | S | I | H  | L | L | E | Y | F  | V | R | W | C | S   | - | - | E | I | G   | - | - | L | C | E | A | W | I | K | I | G | D | P | K | E | V | I | C | N | E | V | K | R | L | R | P | D | I | L | V | V | G | S | R | G | L | N | R | L | - | E | M | V | S | V | S | E | - | - | F | C | S | K | H | A | C | L | V | I | M | I | K | R | K |
| c101733_g1.i2 | T  | R | I | V | I | A  | V | N | Q | S | S  | S | S | S | K | N  | A | F | E | W | A  | I | K | K | L | F  | K | L | Y | I | L  | H | V | S | I | H  | L | L | E | Y | F  | V | R | W | C | S   | - | - | E | I | G   | - | - | L | C | E | A | W | I | K | I | G | D | P | K | E | V | I | C | N | E | V | K | R | L | R | P | D | I | L | V | V | G | S | R | G | L | N | R | L | - | E | M | V | S | V | S | E | - | - | F | C | S | K | H | A | C | L | V | I | V | K | R | K |   |
| c101733_g1.i3 | T  | R | I | V | I | A  | V | N | Q | S | S  | S | S | S | K | N  | A | F | E | W | A  | I | K | K | L | F  | K | L | Y | I | L  | H | V | S | I | H  | L | L | E | Y | F  | V | R | W | C | S   | - | - | E | I | G   | - | - | L | C | E | A | W | I | K | I | G | D | P | K | E | V | I | C | N | E | V | K | R | L | R | P | D | I | L | V | V | G | S | R | G | L | N | R | L | - | E | M | V | S | V | S | E | - | - | F | C | S | K | H | A | C | L | V | I | V | K | R | K |   |
| c103092_g1.i1 | R  | R | I | M | I | A  | V | D | E | S | E  | S | E | S | M | Y  | A | L | E | W | A  | L | D | N | L | D  | R | I | I | V | V  | H | A | T | E | R  | V | L | S | I | A  | K | A | I | C | D   | - | - | Q | R | N   | - | - | V | I | E | T | K | M | A | T | G | D | P | R | Y | A | I | C | E | A | A | E | K | L | N | V | N | L | I | V | G | S | R | G | Y | G | A | I | - | K | R | A | S | V | S | D | - | - | Y | C | A | H | A | C | P | V | L | I | V | K | R | Q |   |   |
| c104737_g1.i3 | K  | N | V | M | V | V  | D | A | S | P | E  | A | K | I | A | M  | L | W | A | L | T  | N |   |   |   |    |   |   |   |   |    |   |   |   |   |    |   |   |   |   |    |   |   |   |   |     |   |   |   |   |     |   |   |   |   |   |   |   |   |   |   |   |   |   |   |   |   |   |   |   |   |   |   |   |   |   |   |   |   |   |   |   |   |   |   |   |   |   |   |   |   |   |   |   |   |   |   |   |   |   |   |   |   |   |   |   |   |   |   |   |   |   |   |   |   |
